# Supplementary material for: Sensitive Detection of Cell-Free Tumour DNA Using Optimised Targeted Sequencing Can Predict Prognosis in Gastro-Oesophageal Cancer
Source: Cancers (Basel). 2023 Feb 11;15(4):1160. doi: 10.3390/cancers15041160 (PMC9954085; doi:10.3390/cancers15041160)

# Supplementary figure S6

1D and 2D plots and concentration graphs from  
Quantasoft for ddPCR on 12 patients

ddPCR; digital droplet PCR, pre; diagnostic plasma sample, post; plasma sample from after surgery,  
NK; negative control (wild type), NTC; no template control, pos ctrl; positive control (from tissue  
DNA)

**P28 Final- pre and post**

**Gene targets :** TP53,p.R273H, c.818G>A and KRAS p.G13D, c.38G>A

**Protocol :** Exp 12

**Assays:** 0.7X TP53,p.R273H mut (FAM) and 1X dark probe for TP53,p.R273H  
0.3X KRAS p.G13D mut (FAM) and 1X KRAS WT p.G13D (HEX)

**Annealing temp:** 60°C

0.7X TP53,  
p.R273H

0.3X KRAS  
p.G13D

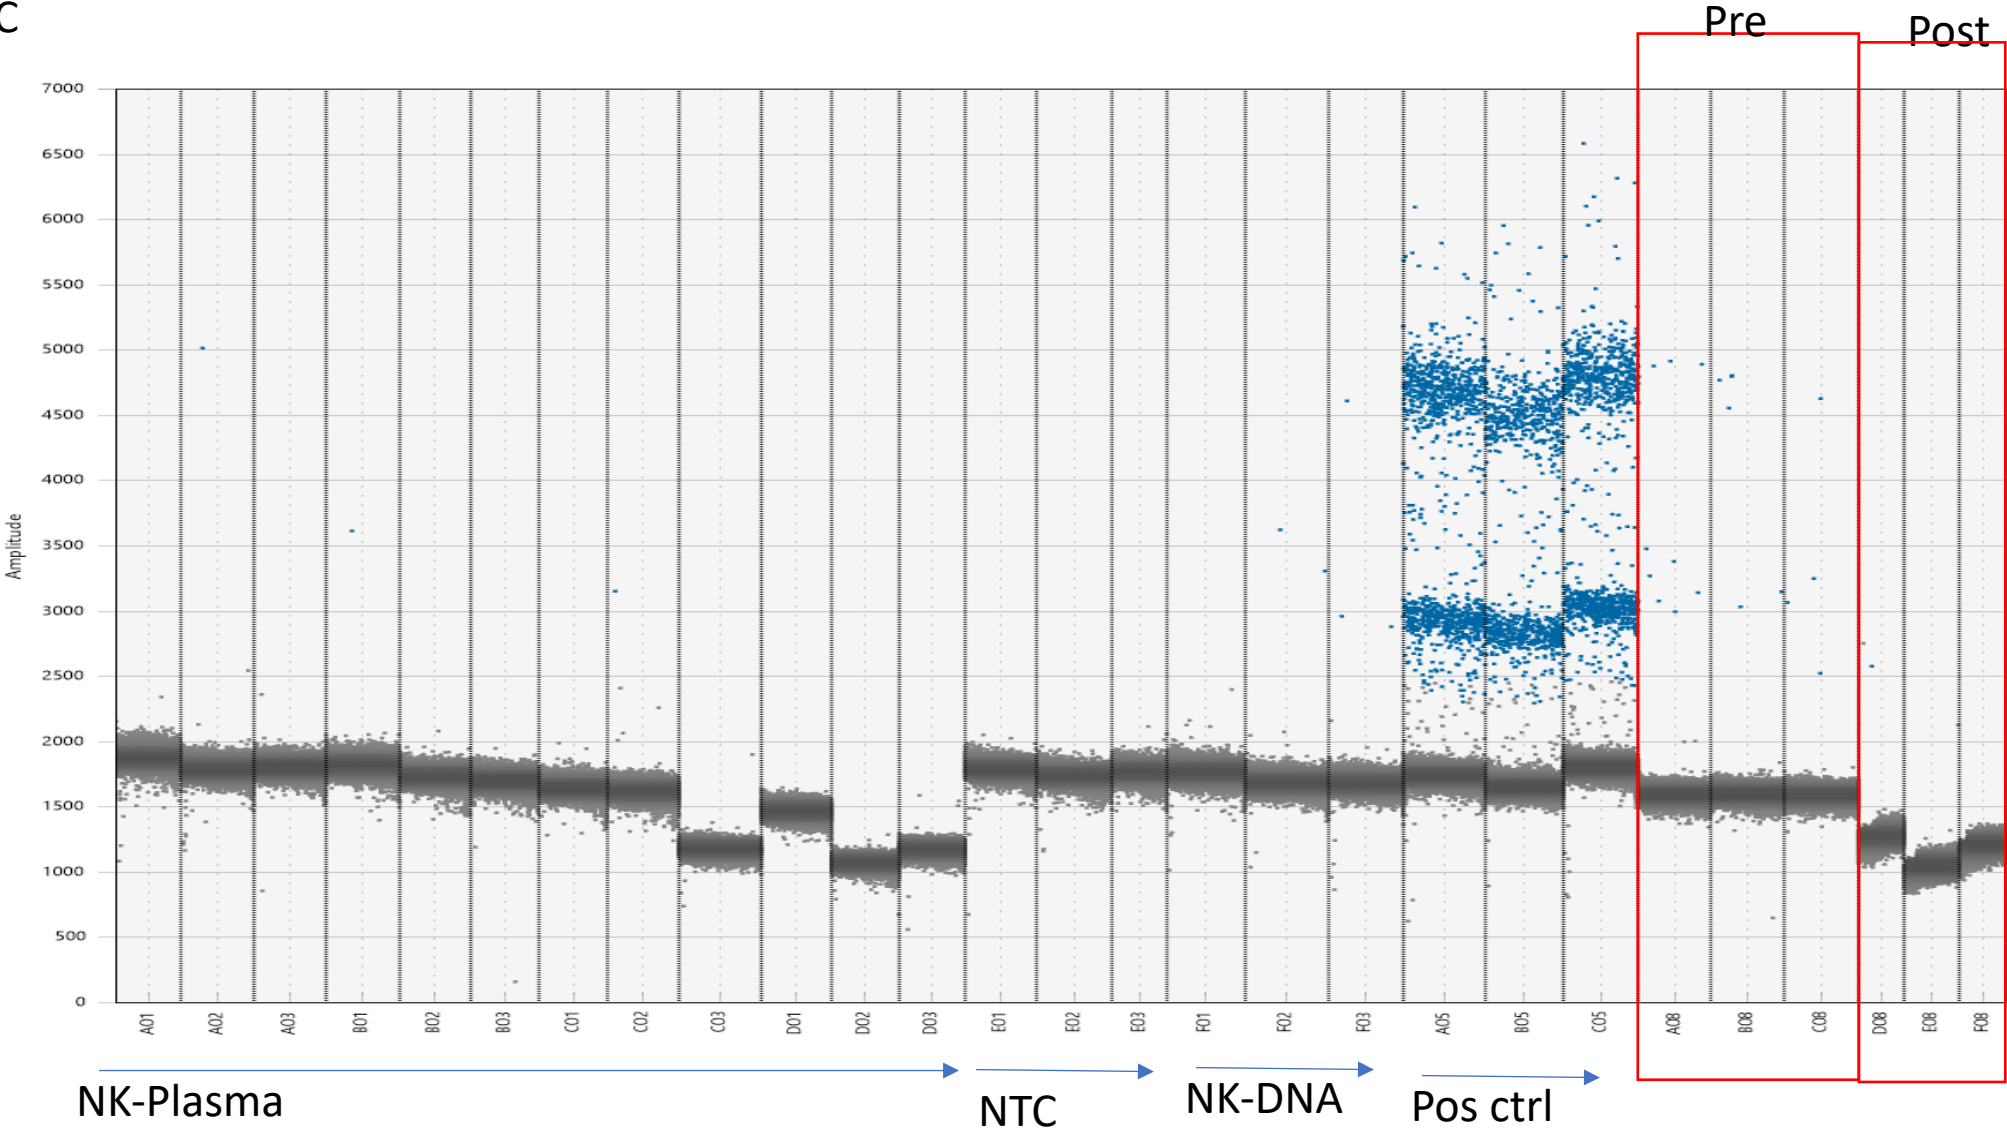

**P28 Final- pre and post**

**Gene targets :** TP53,p.R273H, c.818G>A and KRAS p.G13D, c.38G>A

**Assays:** 1X dark probe for TP53,p.R273H and 1X KRAS WT p.G13D (HEX)

**Annealing temp:** 60°C

**Protocol :** Exp 12

Pre Post

KRAS WT  
p.G13D

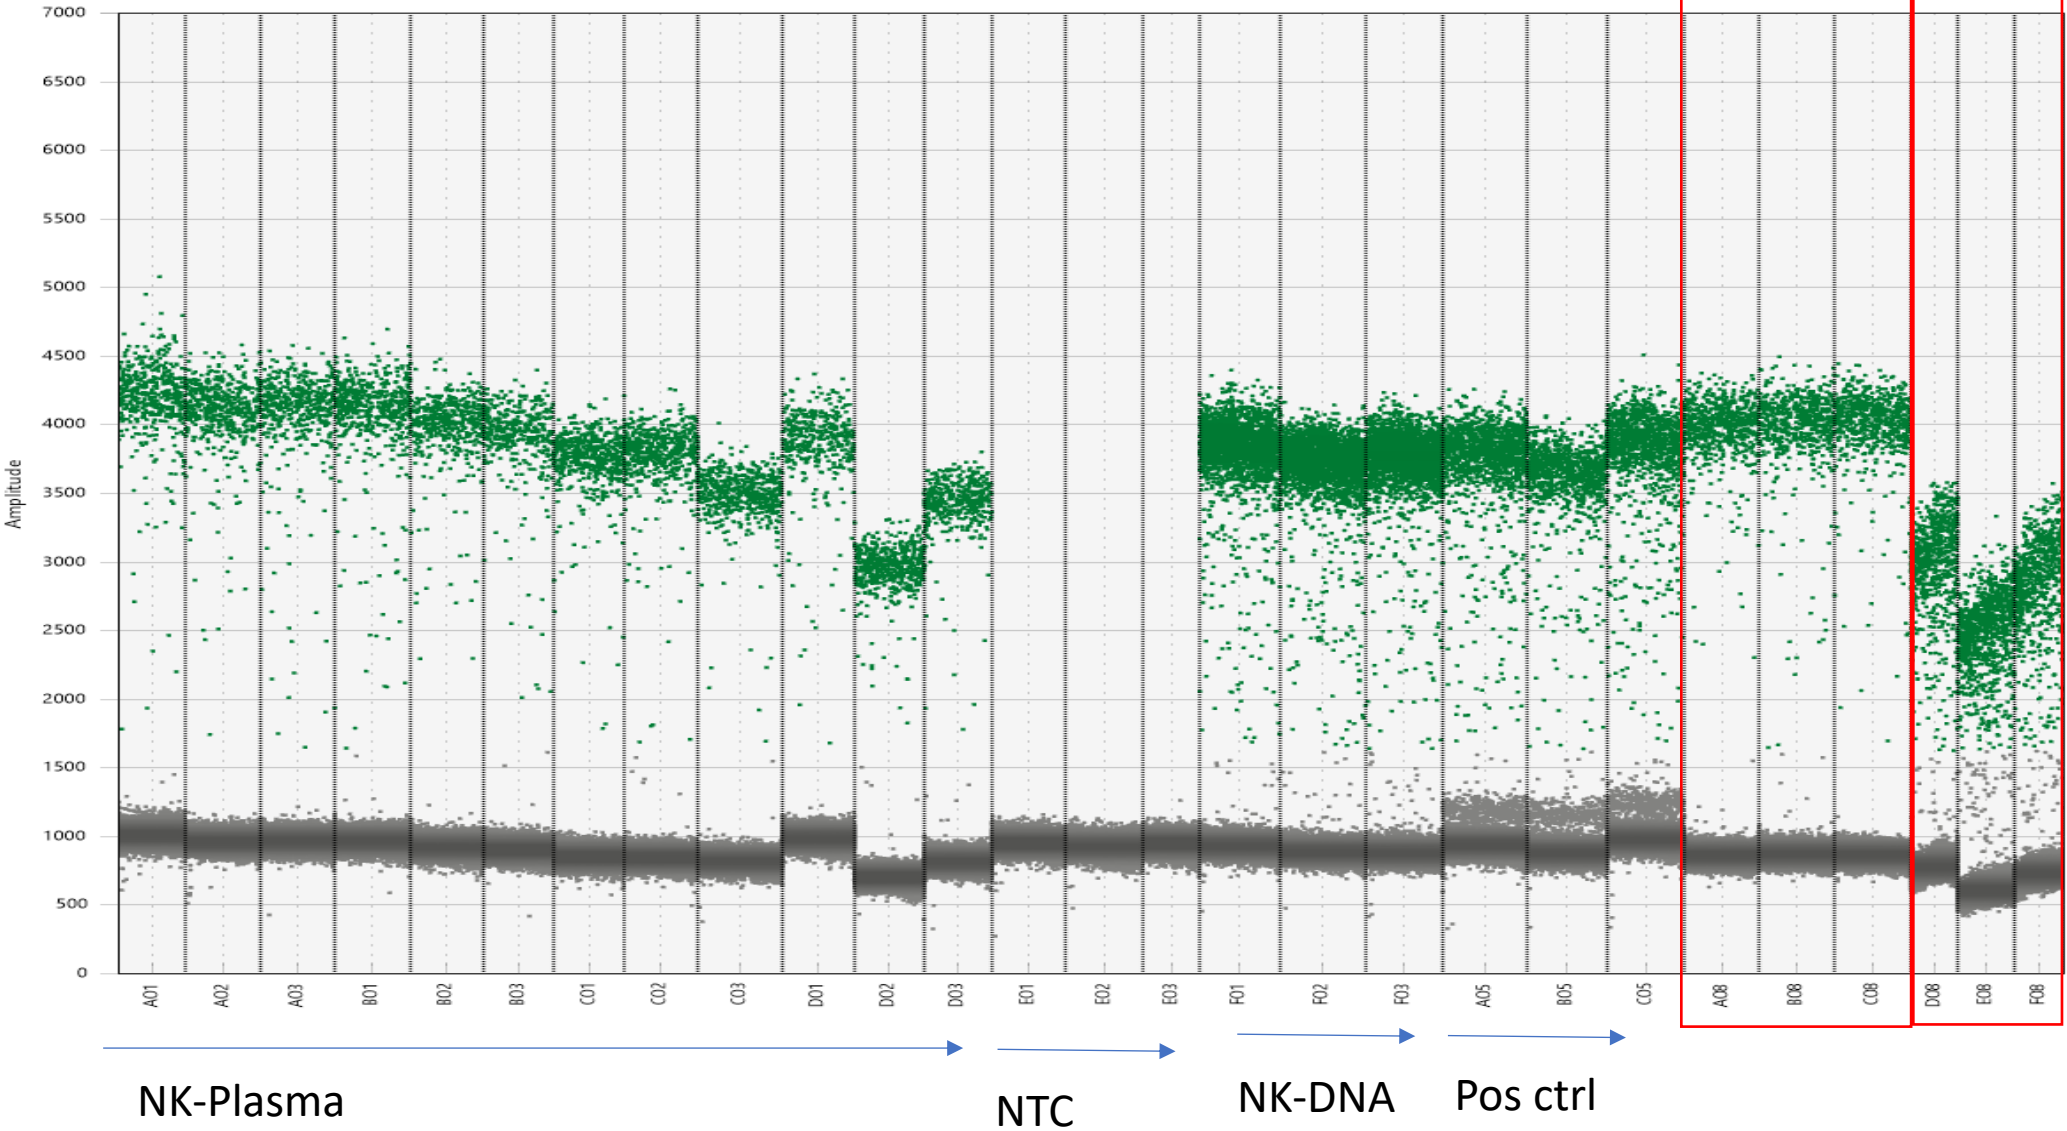

**P28 Final- fp1 and fp2**

**Gene targets :** TP53,p.R273H, c.818G>A and KRAS p.G13D, c.38G>A

**Assays:** 0.7X TP53,p.R273H mut (FAM) and 1X dark probe for TP53,p.R273H  
0.3X KRAS p.G13D mut (FAM) and 1X KRAS WT p.G13D (HEX)

**Protocol :** Exp 12

**Annealing temp:** 60°C

0.7X TP53,  
p.R273H

0.3X KRAS  
p.G13D

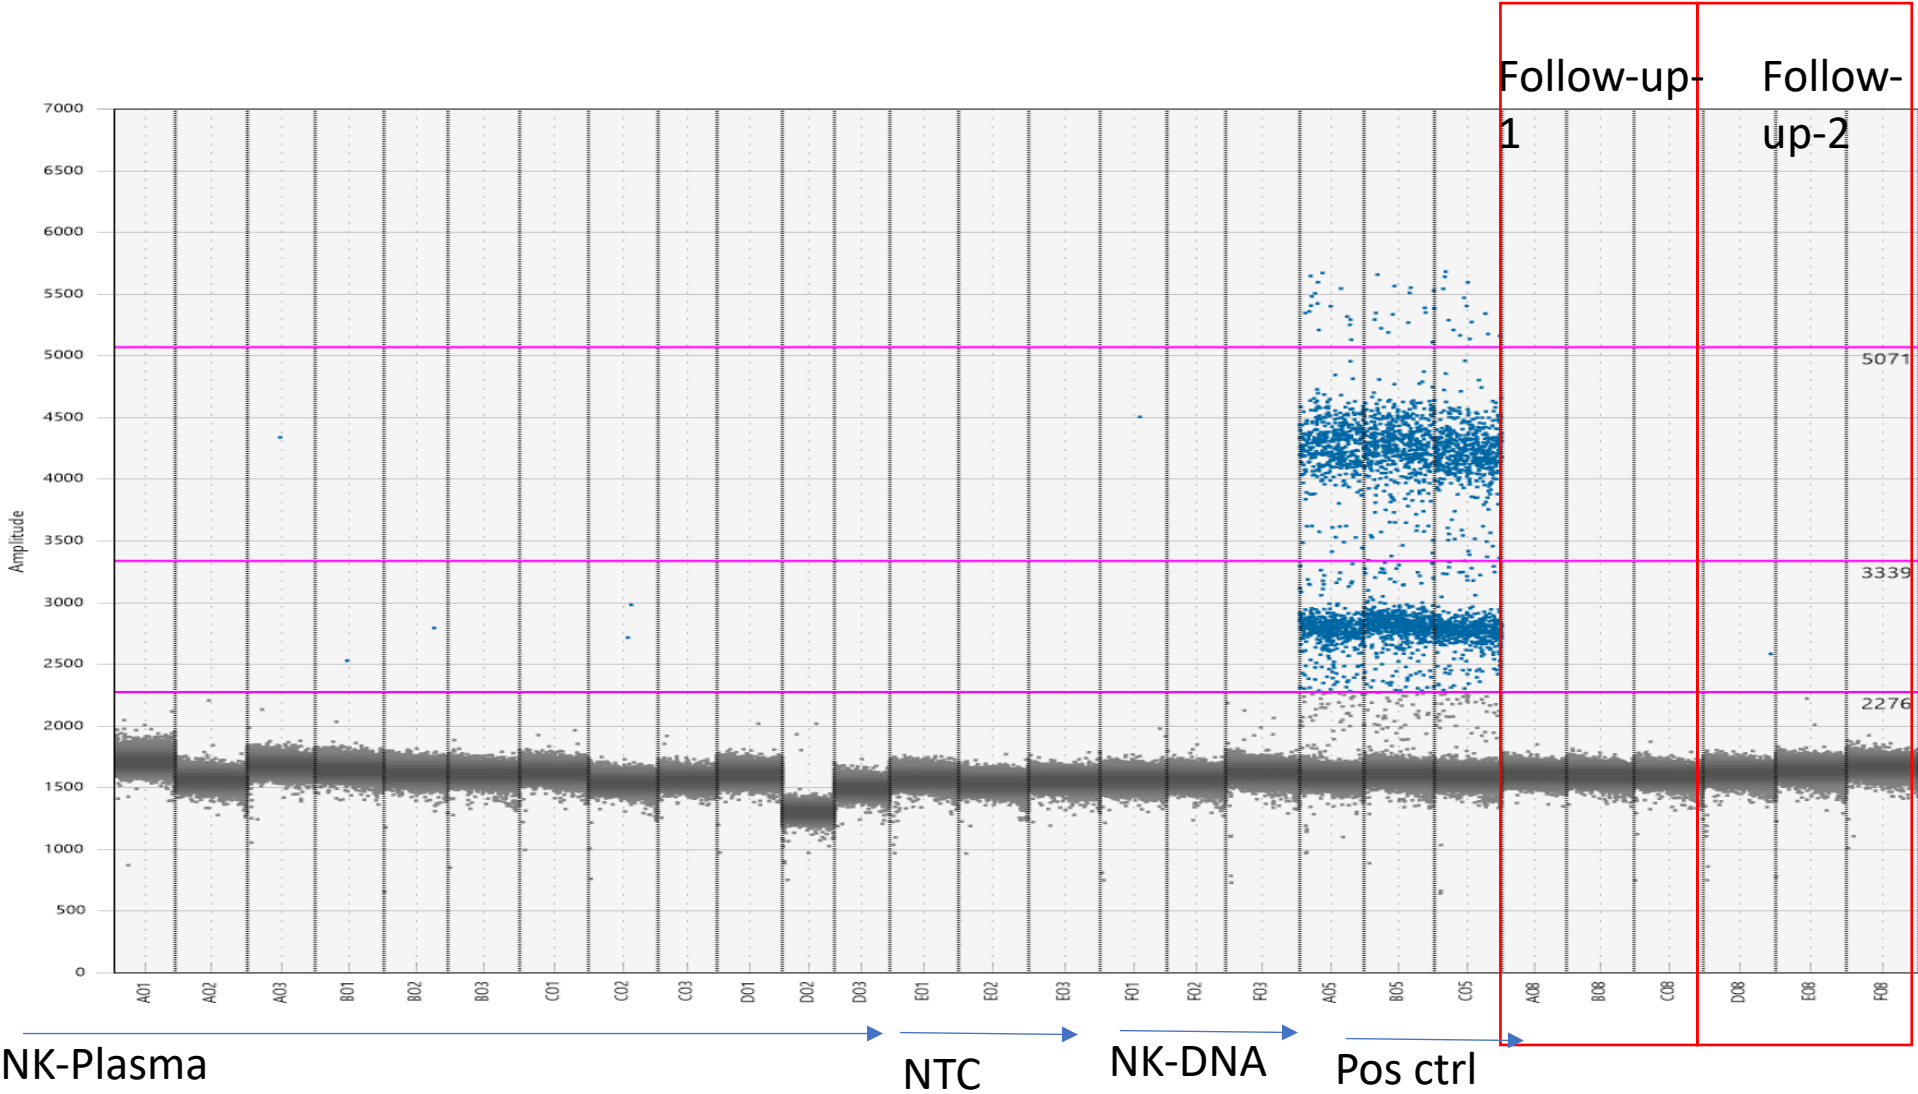

# P28 Final- fp1 and fp2- WT

Gene targets : TP53,p.R273H, c.818G>A and KRAS p.G13D, c.38G>A

Assays: 1X dark probe for TP53,p.R273H and 1X KRAS WT p.G13D (HEX)

Protocol : Exp 12

Annealing temp: 60°C

KRAS WT  
p.G13D  
(HEX)

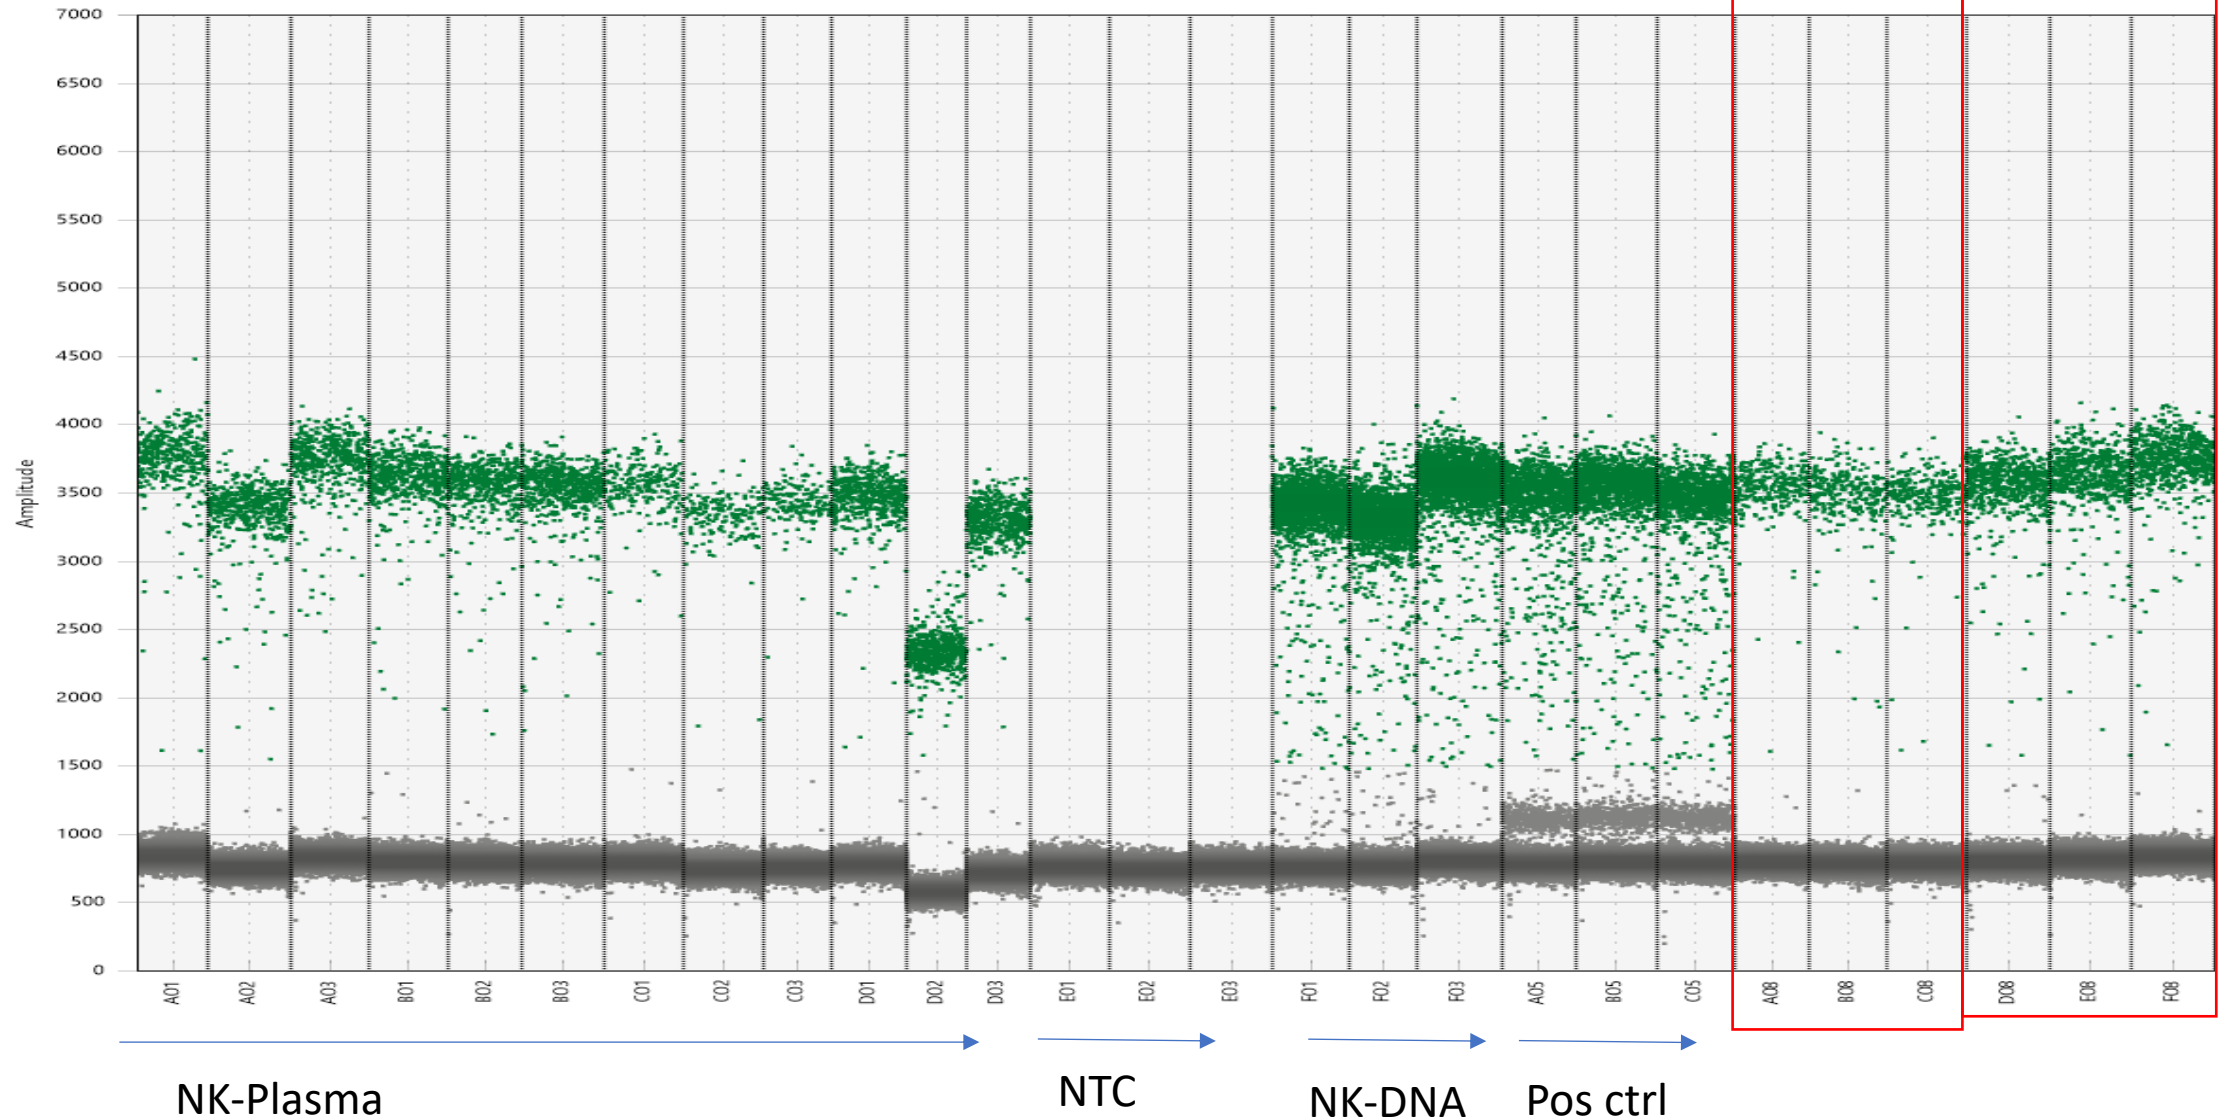

Positive – control

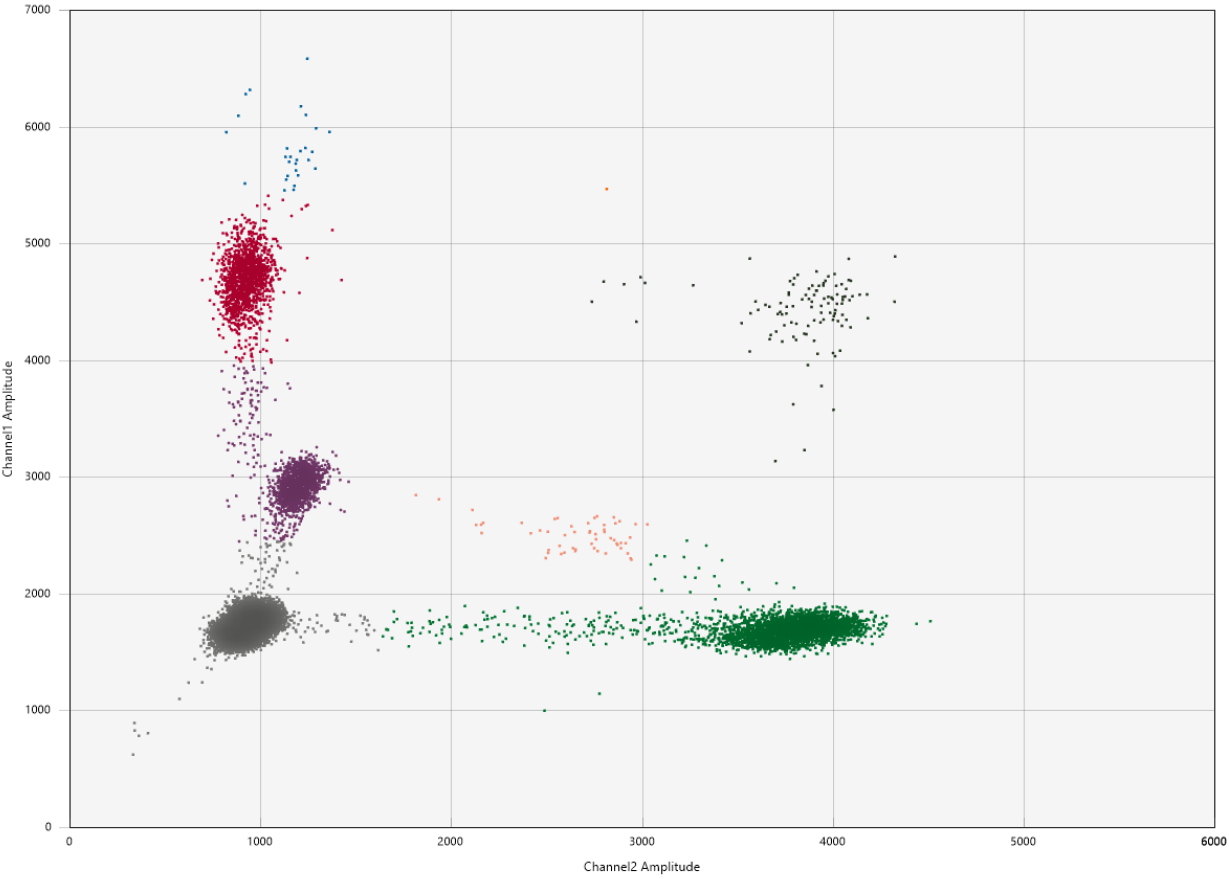

NK-Plasma

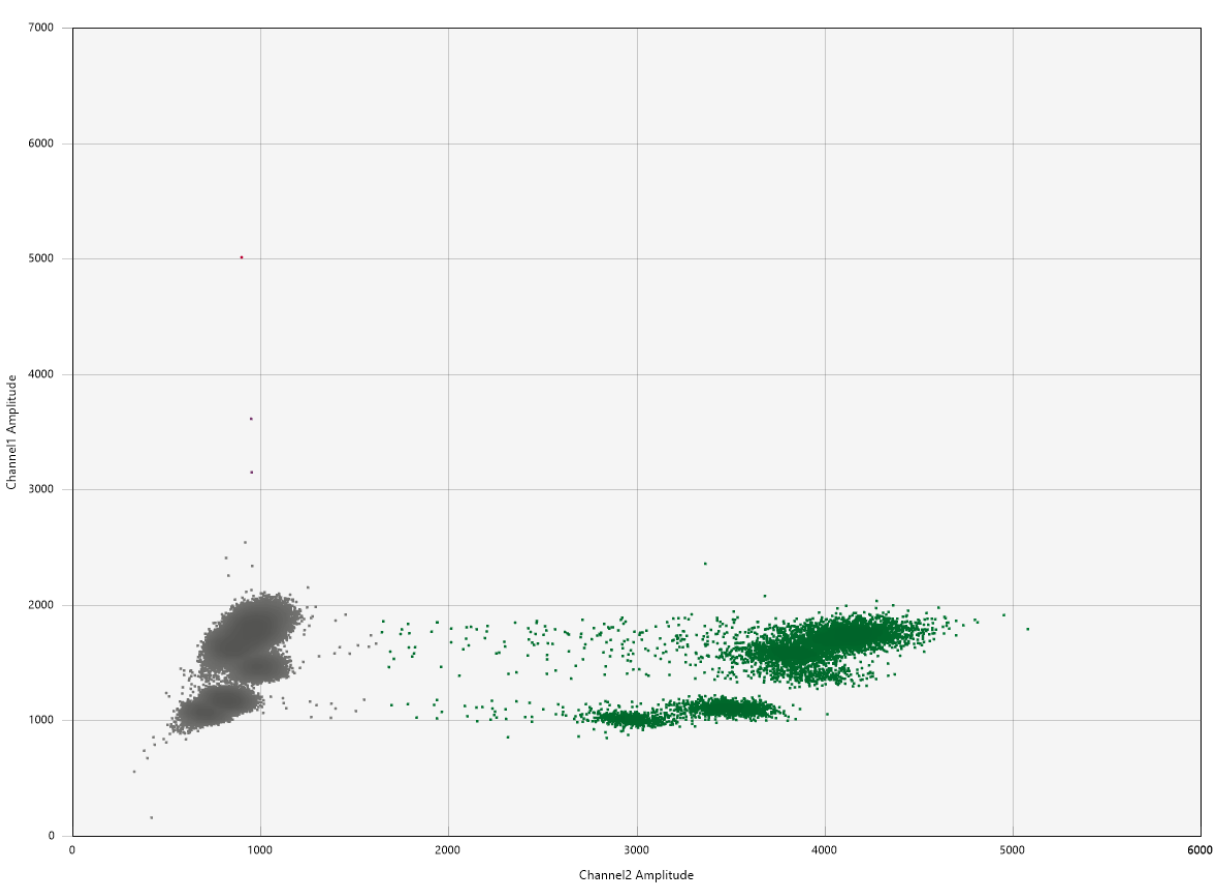

Pre-surgery

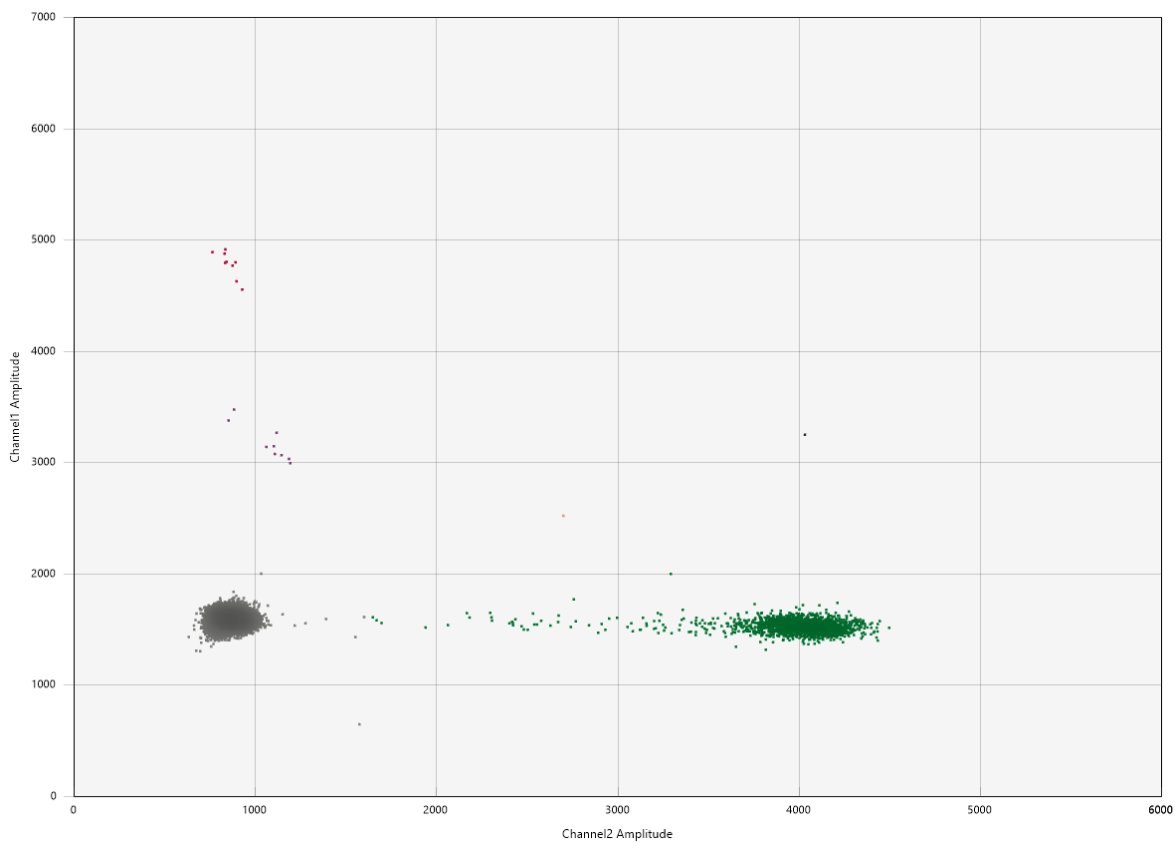

Post-surgery

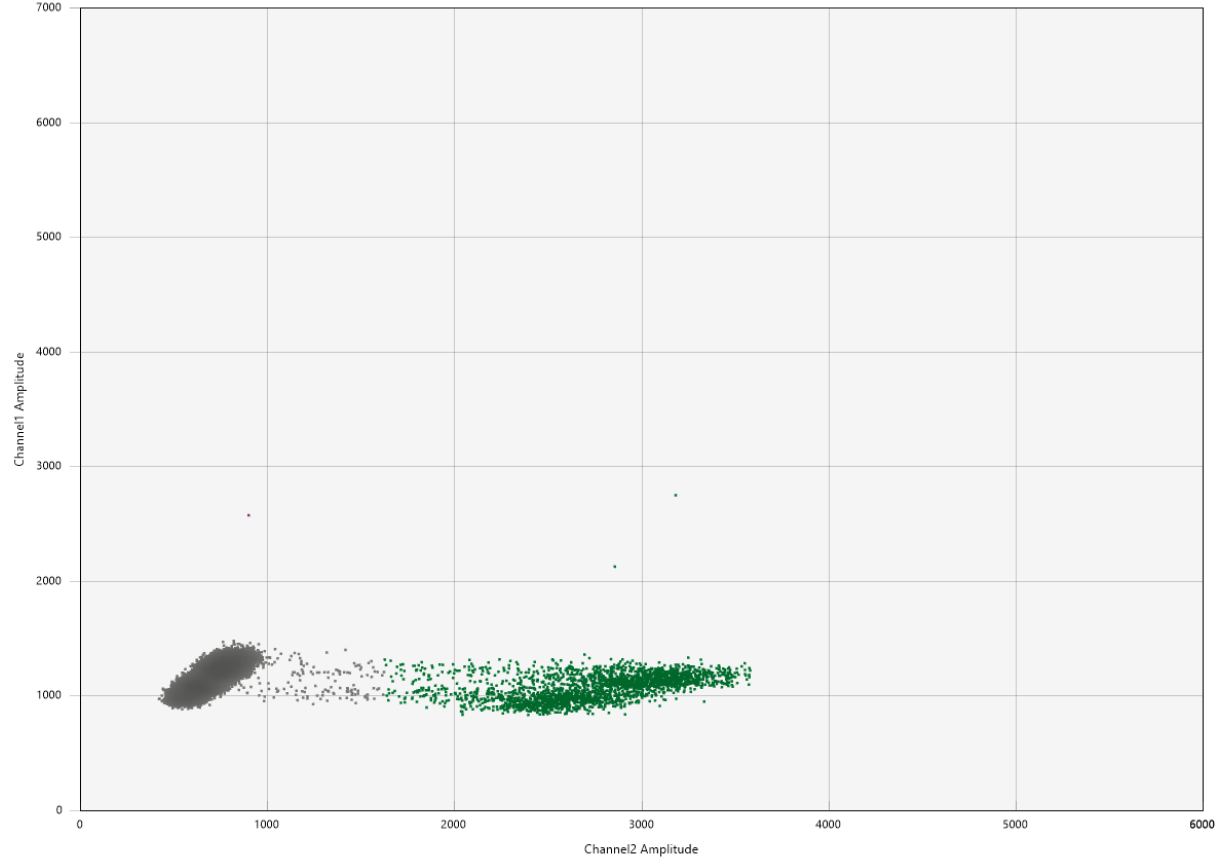

Follow-up 1

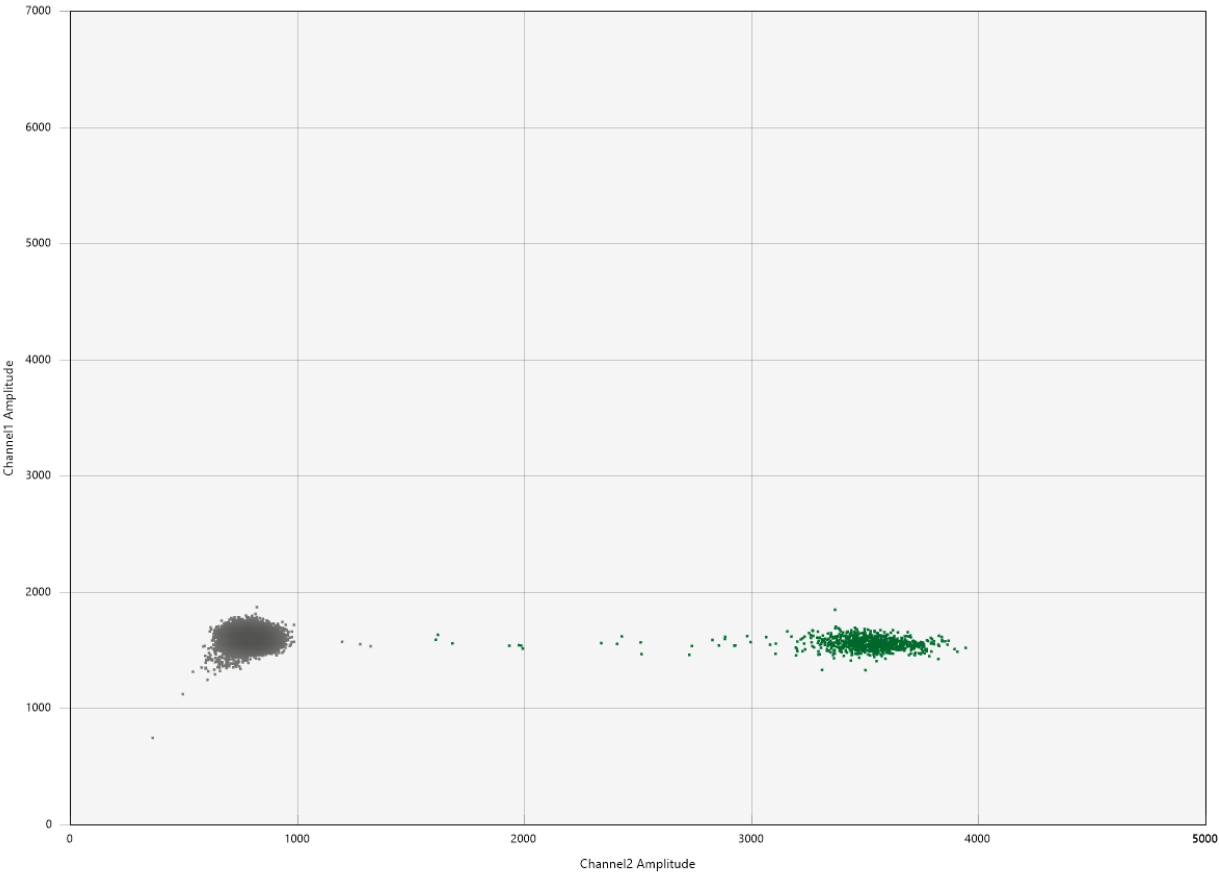

Follow-up 2

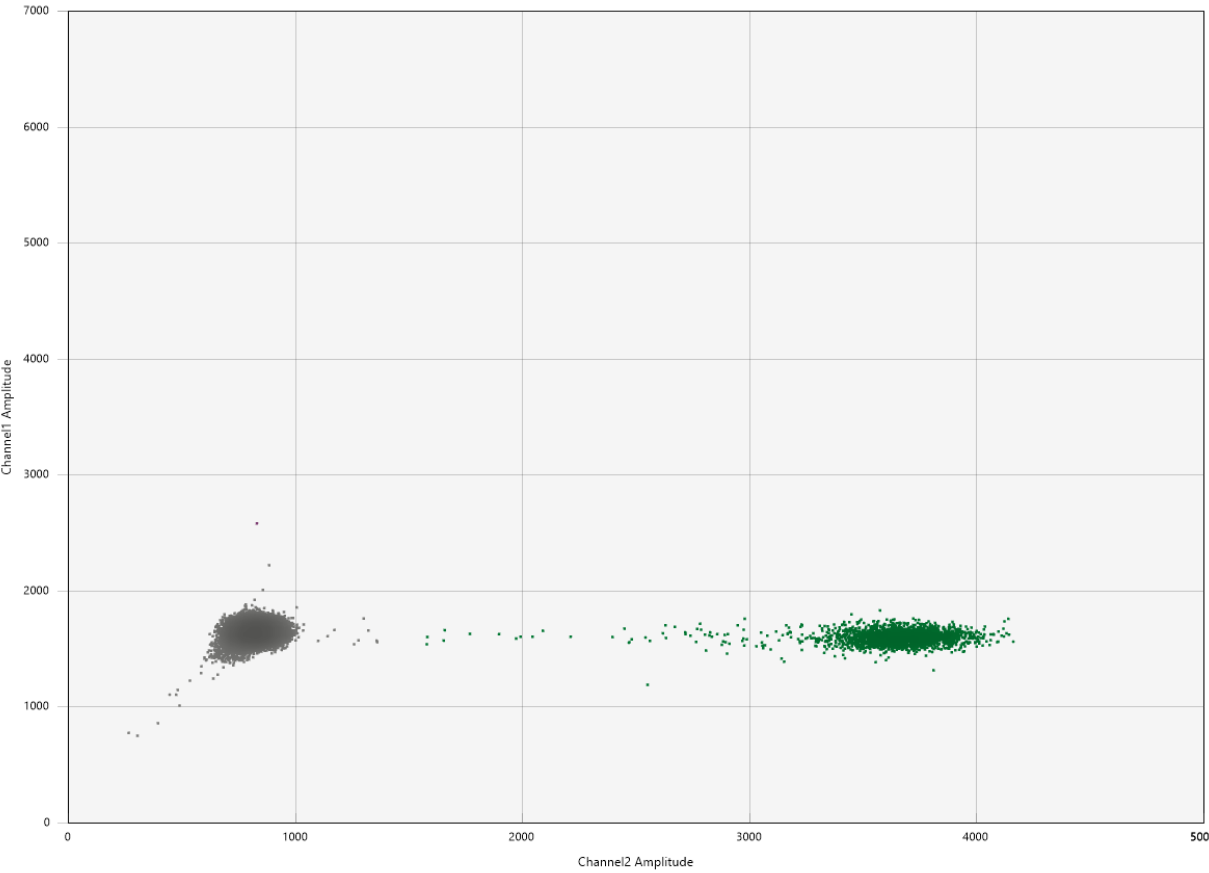

Concentration plots

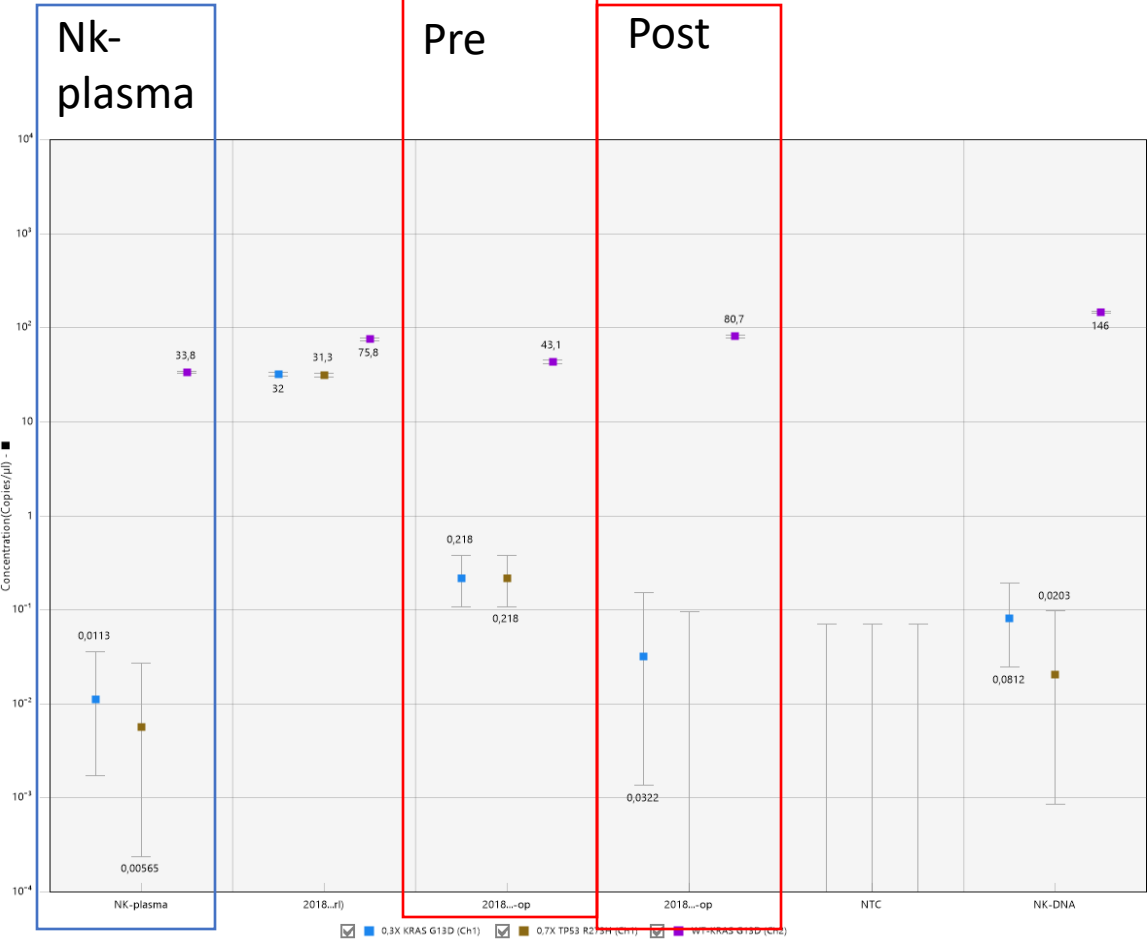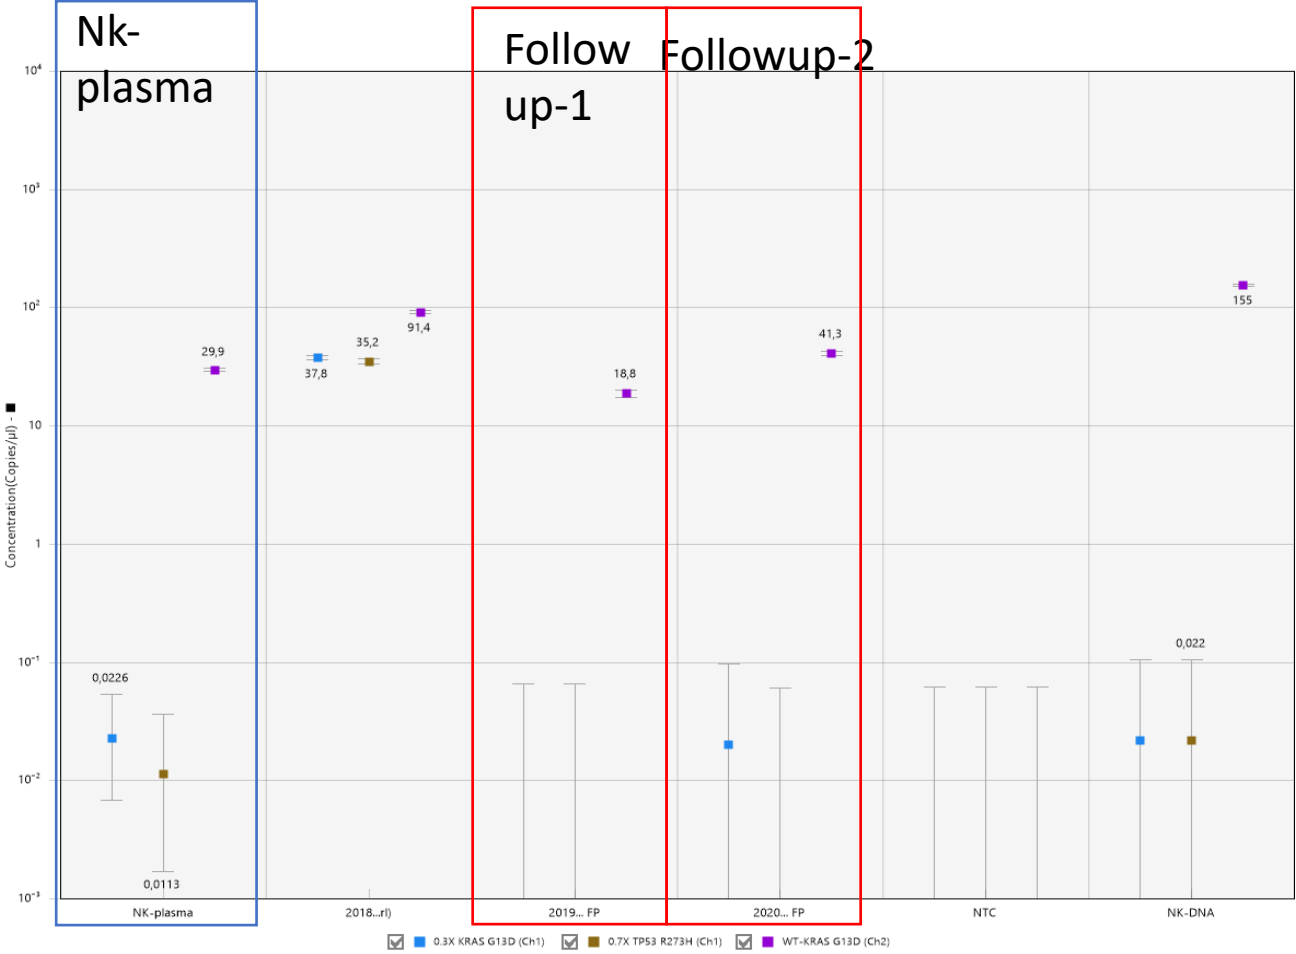

# P27 - Final

Gene targets : PIK3CA, p.H1047R,c.3140A>G and TP53, p.R273C, c.817C>T

Assays: 0.5X PIK3CA, p.H1047R mut (FAM) and 1X PIK3CA WT, p.H1047R (HEX)  
1X TP53, p.R273C mut (FAM) and 1X dark probe for TP53, p.R273C

Annealing temp: 55°C

Protocol: Exp 21

0.5X PIK3CA,  
p.H1047R mut

1X TP53,  
p.R273C mut

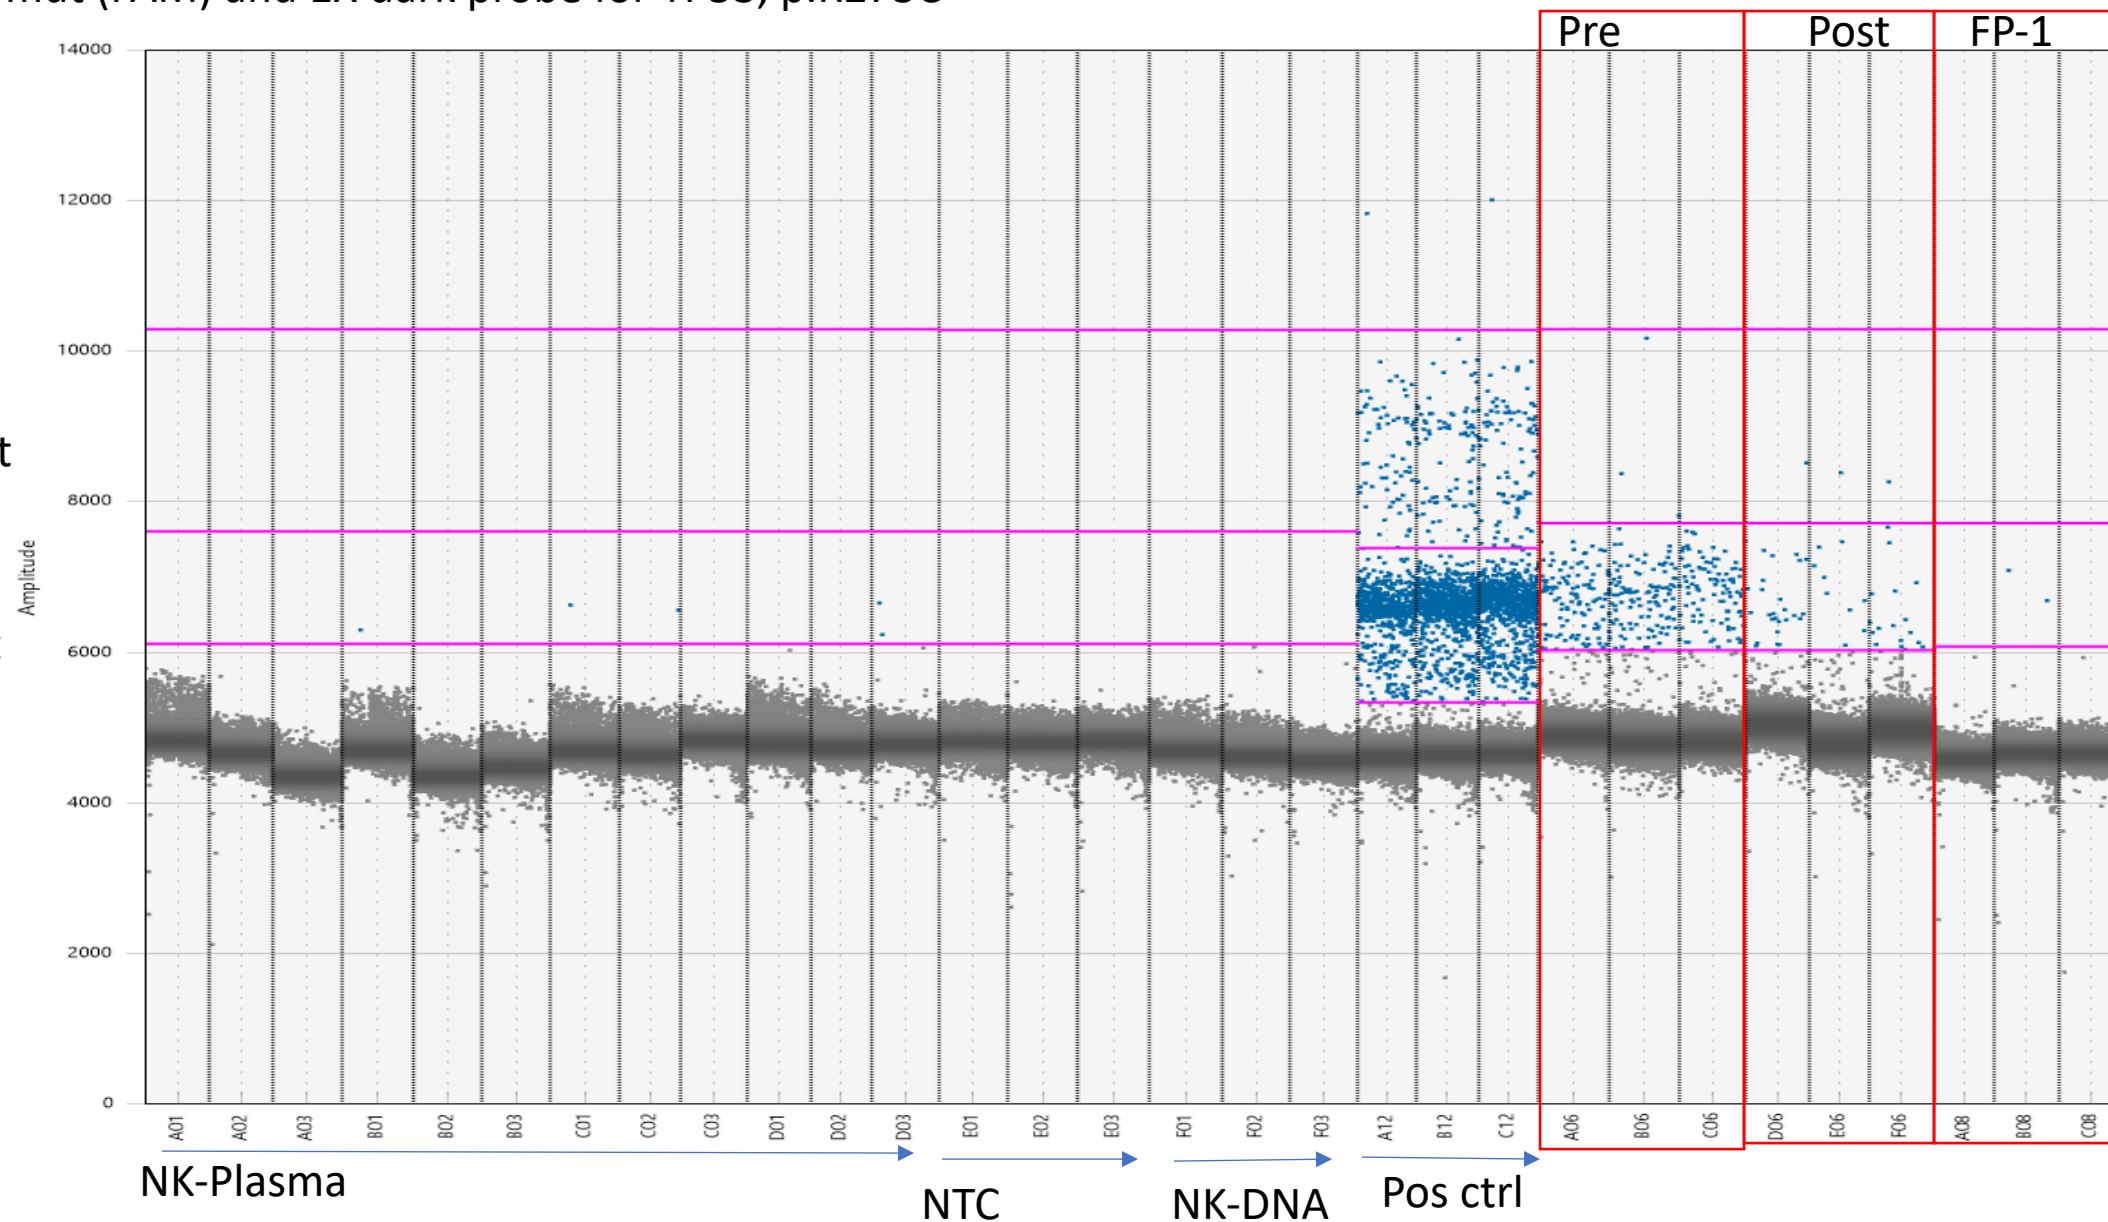

**P27 - Final -WT**

**Gene targets :** PIK3CA, p.H1047R,c.3140A>G and TP53, p.R273C, c.817C>T

**Assays:** 1X PIK3CA WT, p.H1047R (HEX) and 1X dark probe for TP53, p.R273C

**Annealing temp:** 55°C

**Protocol:** Exp 21

0.5X PIK3CA  
WT,  
p.H1047R

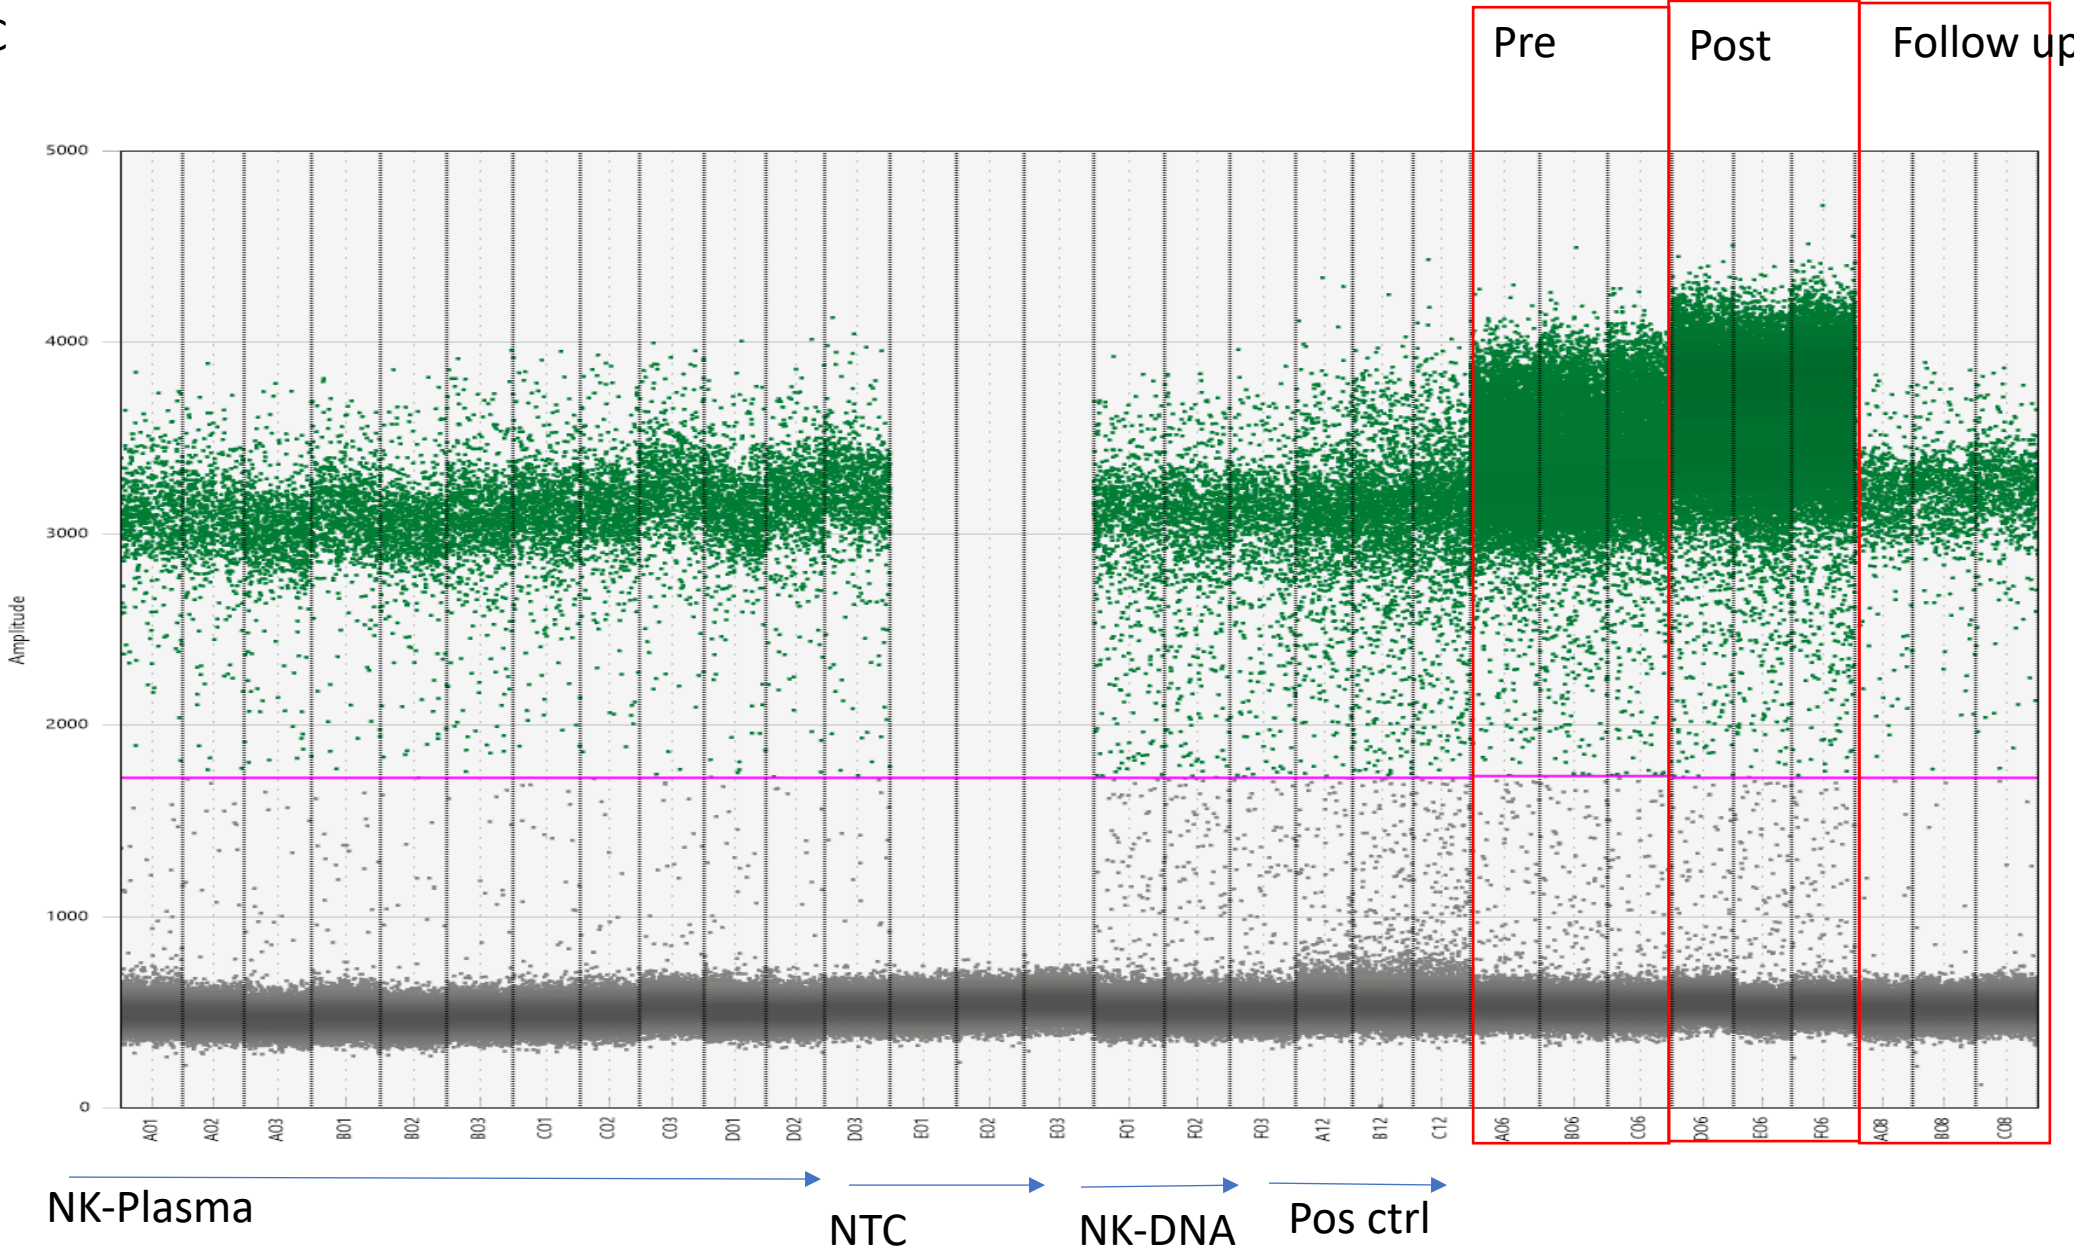

**P27 - Final diluted**

**Gene targets :** PIK3CA, p.H1047R,c.3140A>G and TP53, p.R273C, c.817C>T

**Assays:** 0.5X PIK3CA, p.H1047R mut (FAM) and 1X PIK3CA WT, p.H1047R (HEX)  
1X TP53, p.R273C mut (FAM) and 1X dark probe for TP53, p.R273C

**Annealing temp:** 55°C  
**Protocol:** Exp 23

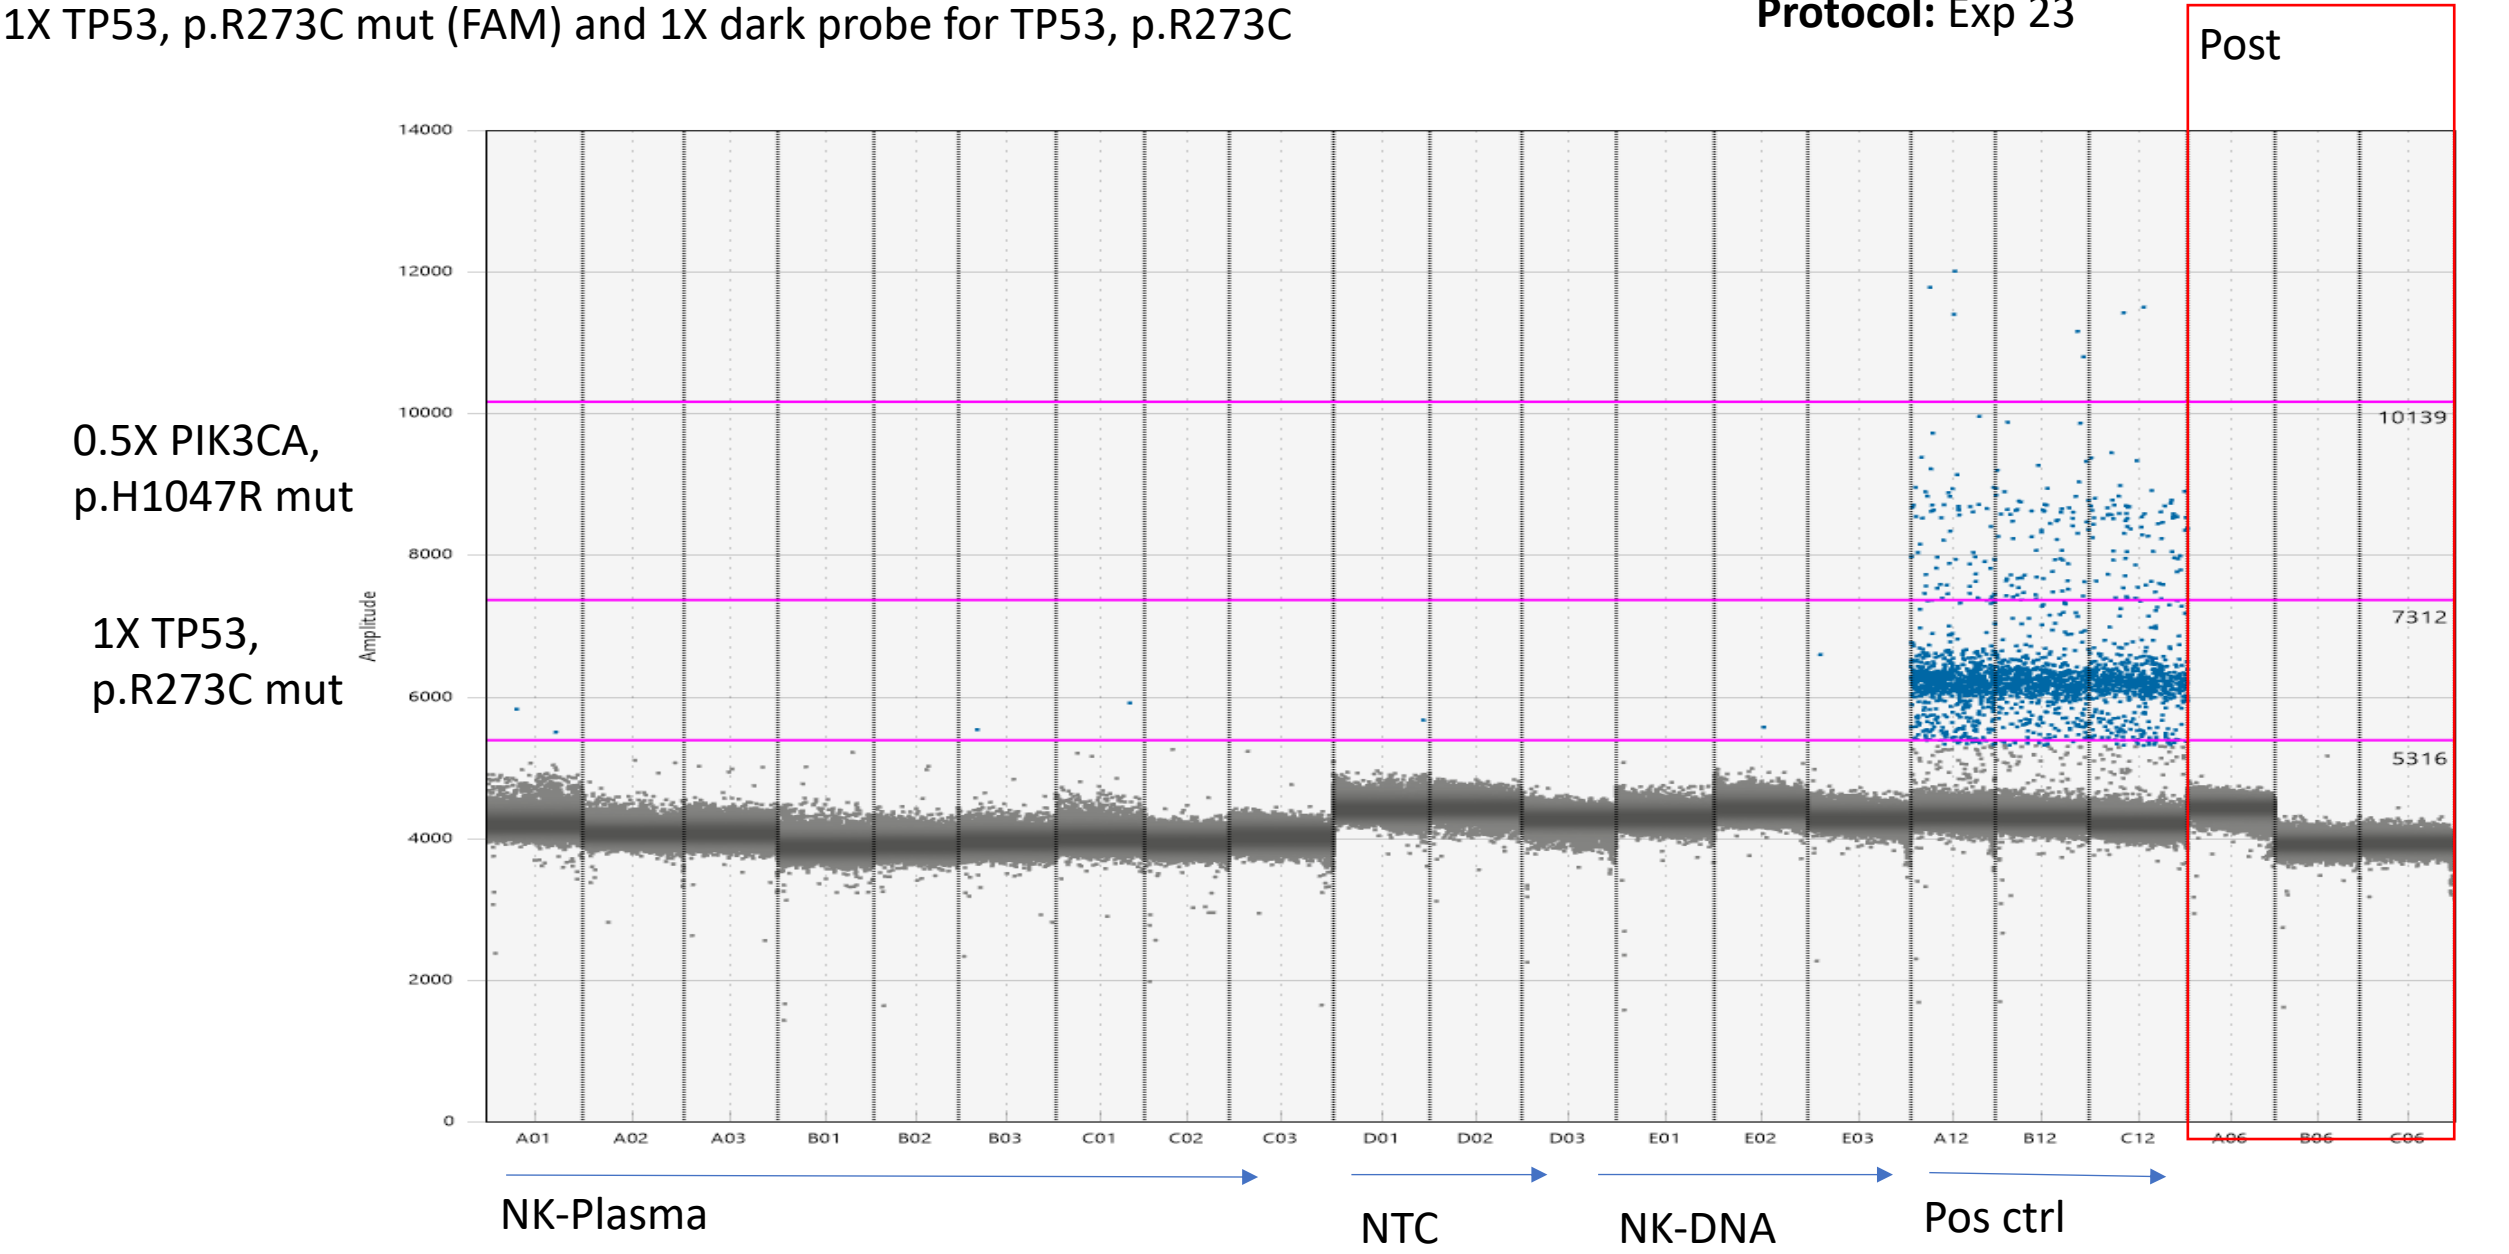

**P27 - Final diluted -WT**

**Gene targets :** PIK3CA, p.H1047R,c.3140A>G and TP53, p.R273C, c.817C>T

**Assays:** 1X PIK3CA WT, p.H1047R (HEX) and 1X dark probe for TP53, p.R273C

**Annealing temp:** 55°C

**Protocol:** Exp 23

Post

0.5X PIK3CA WT, p.H1047R

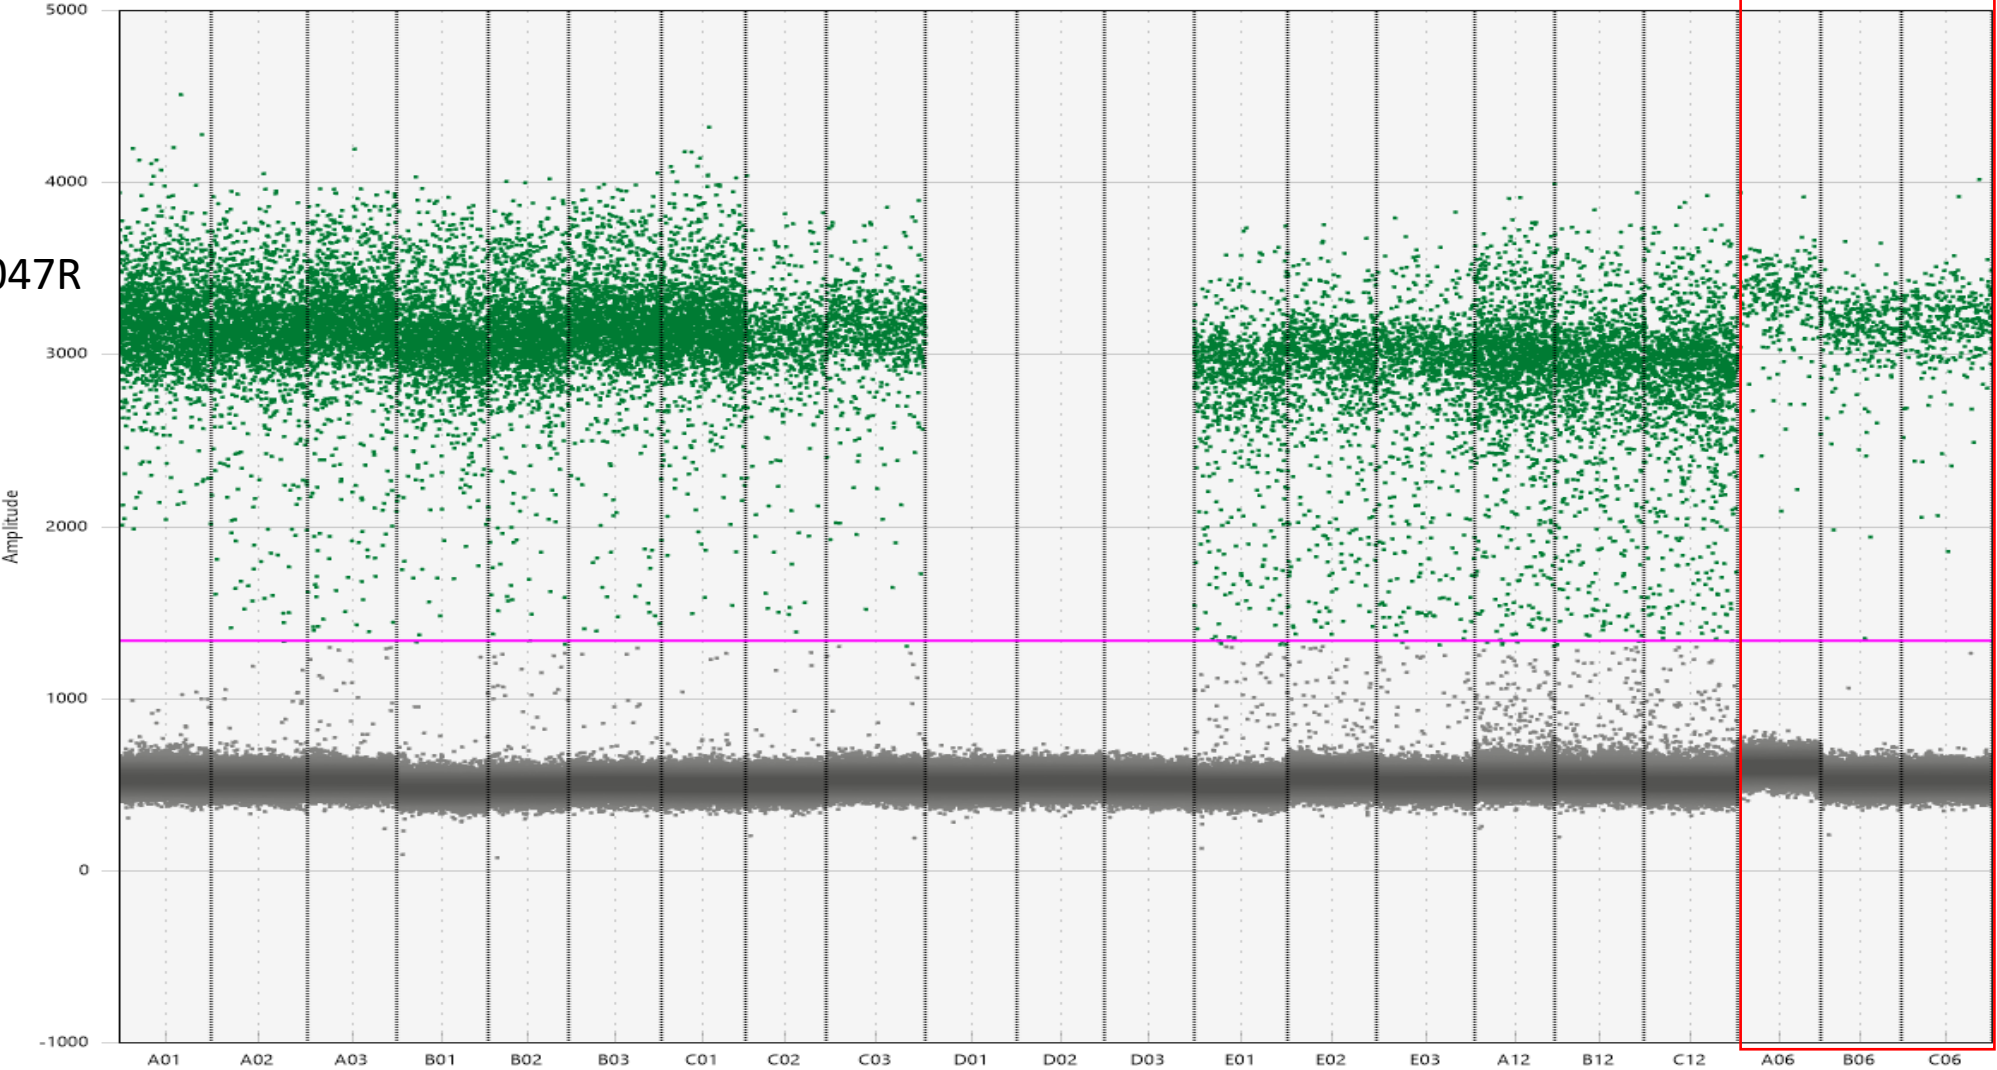

NK-Plasma

NTC

NK-DNA

Pos ctrl

Positive – control

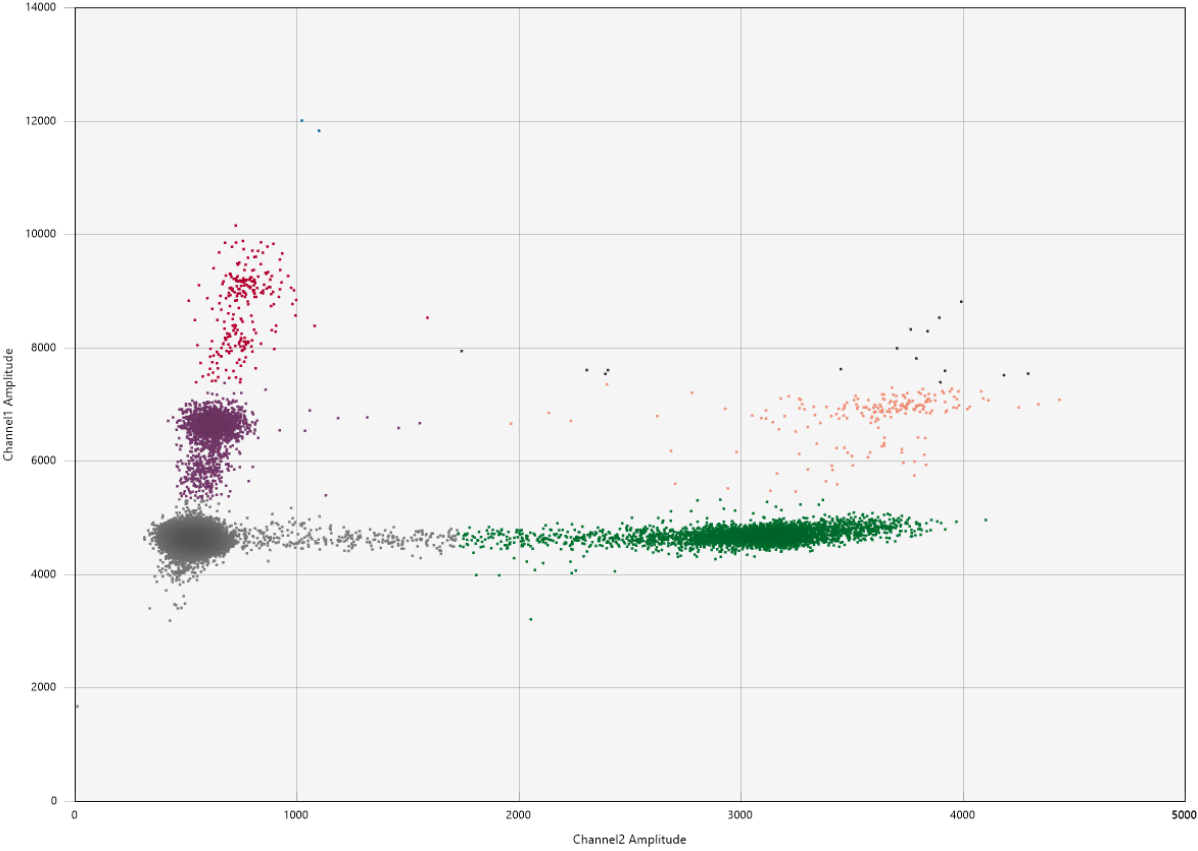

NK-Plasma

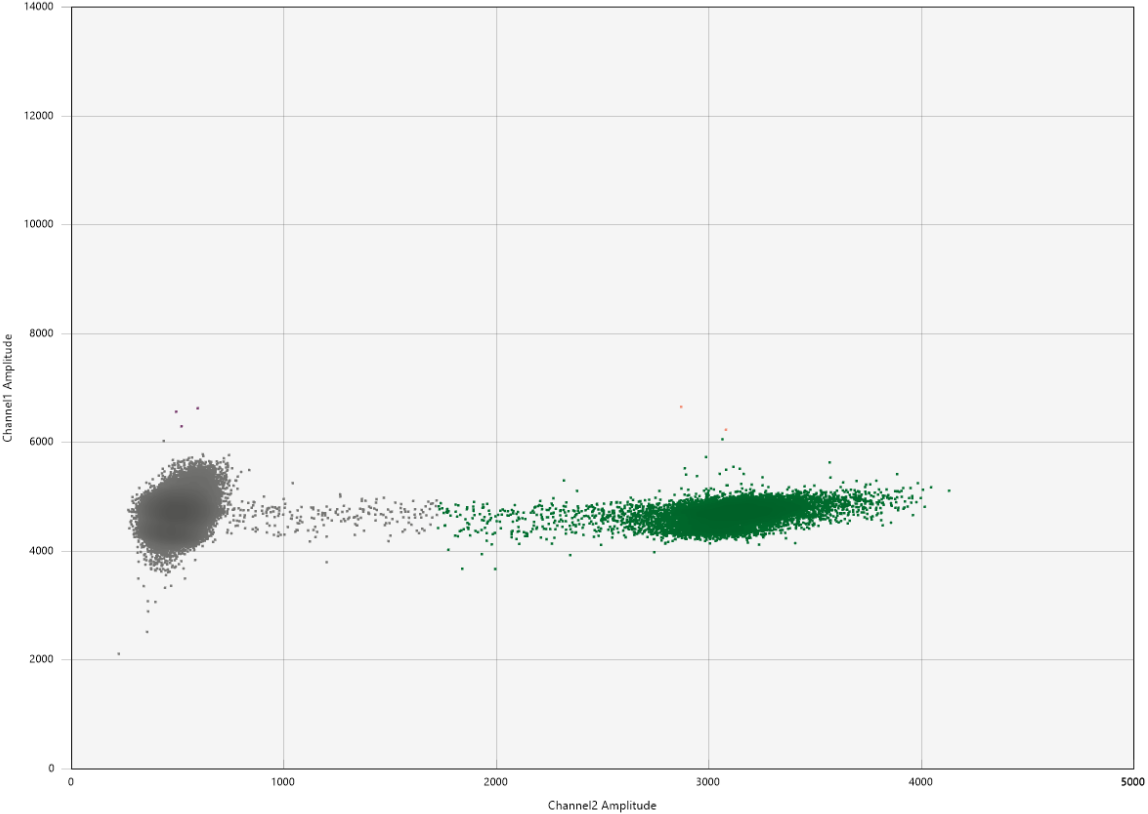

Pre-surgery

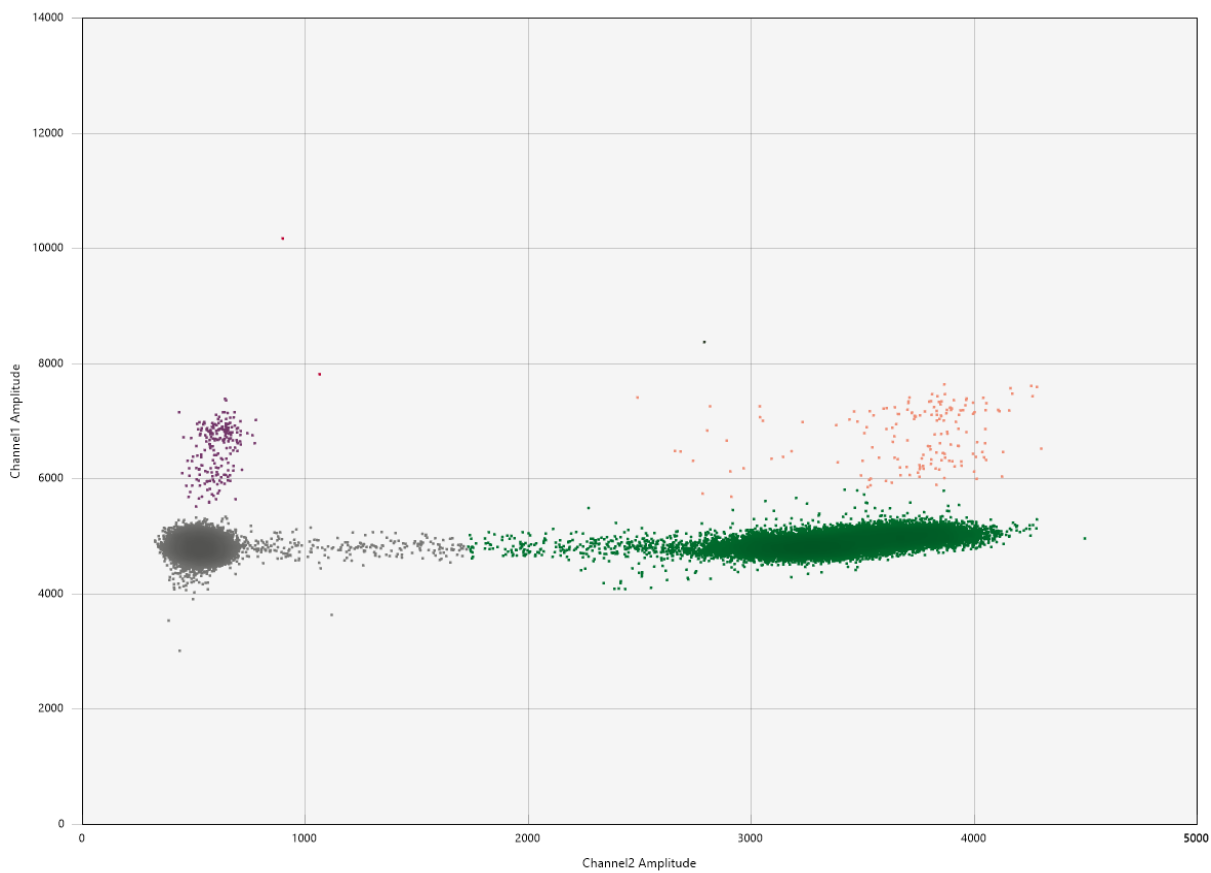

Follow-up 1

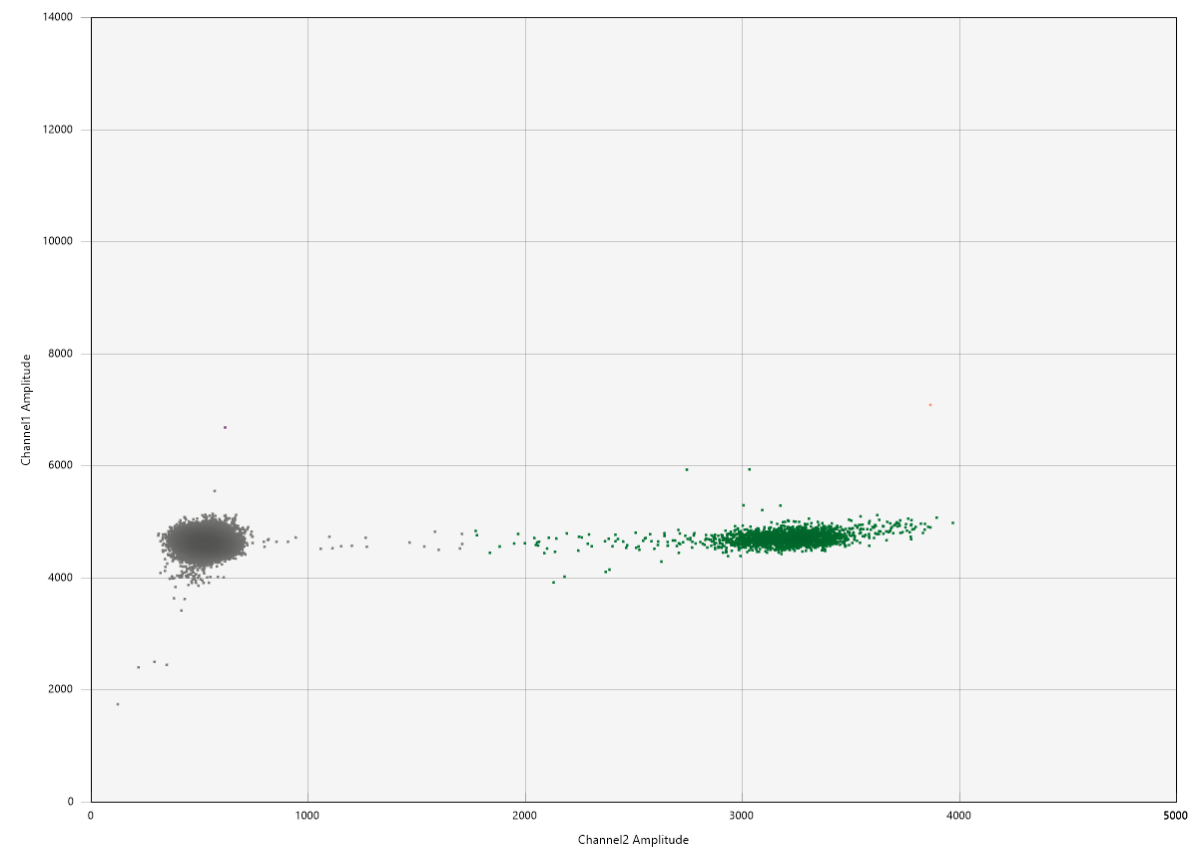

Post-surgery

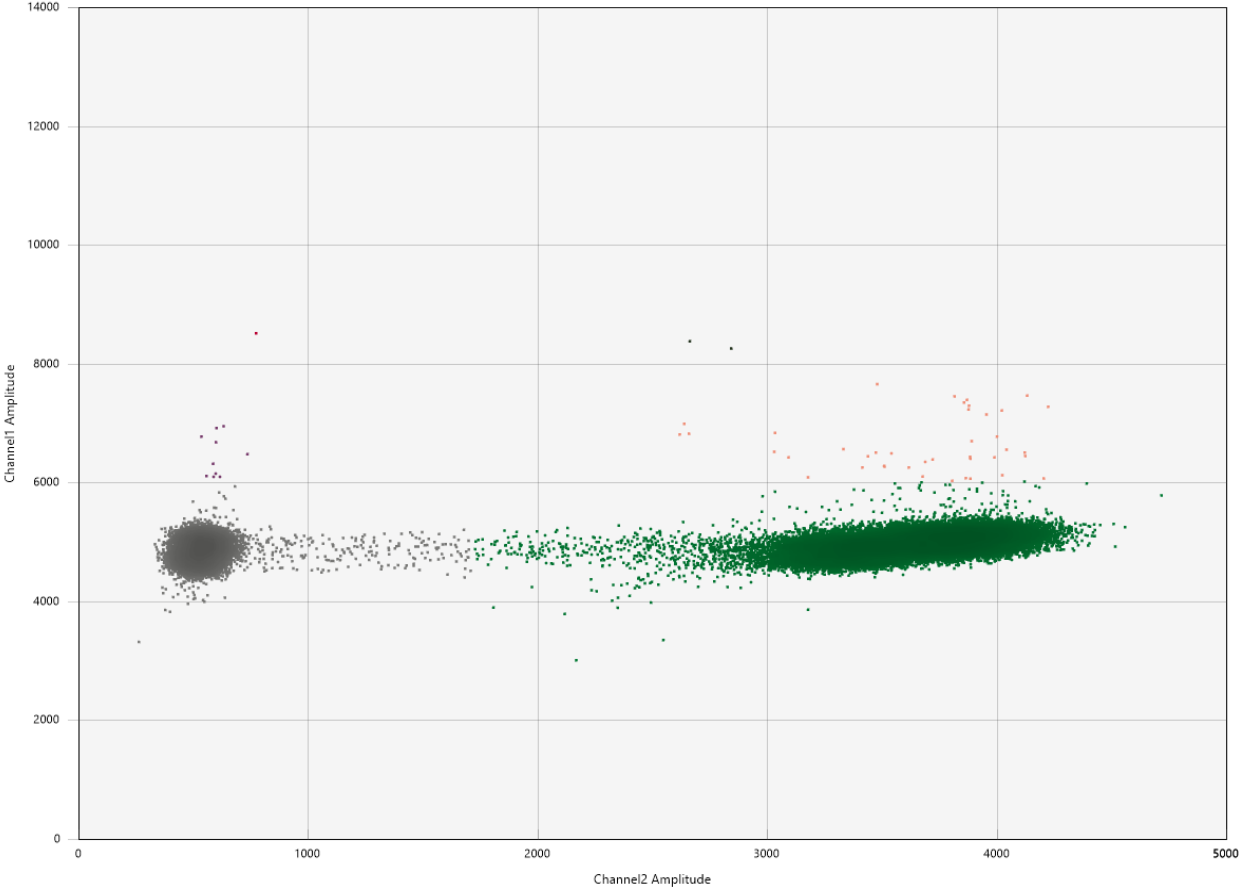

Post-surgery diluted

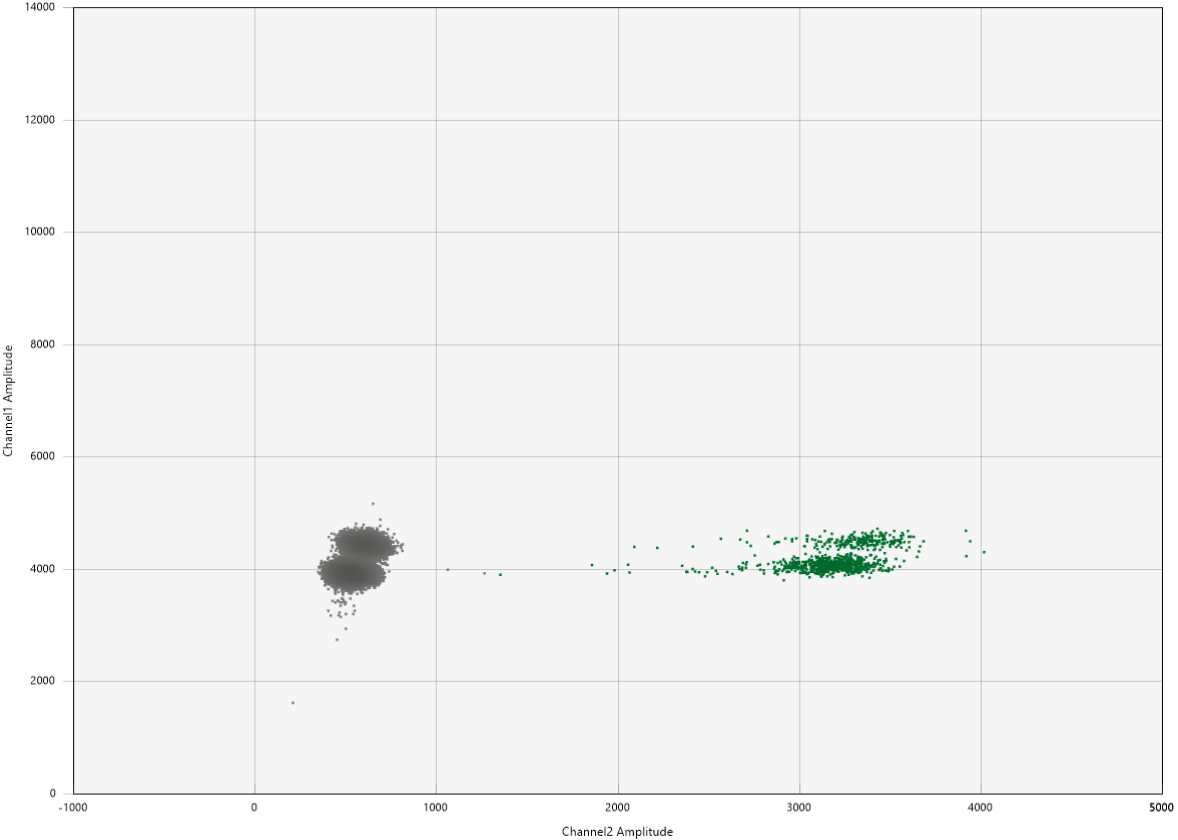

Concentration plots      Pre, post and follow-up

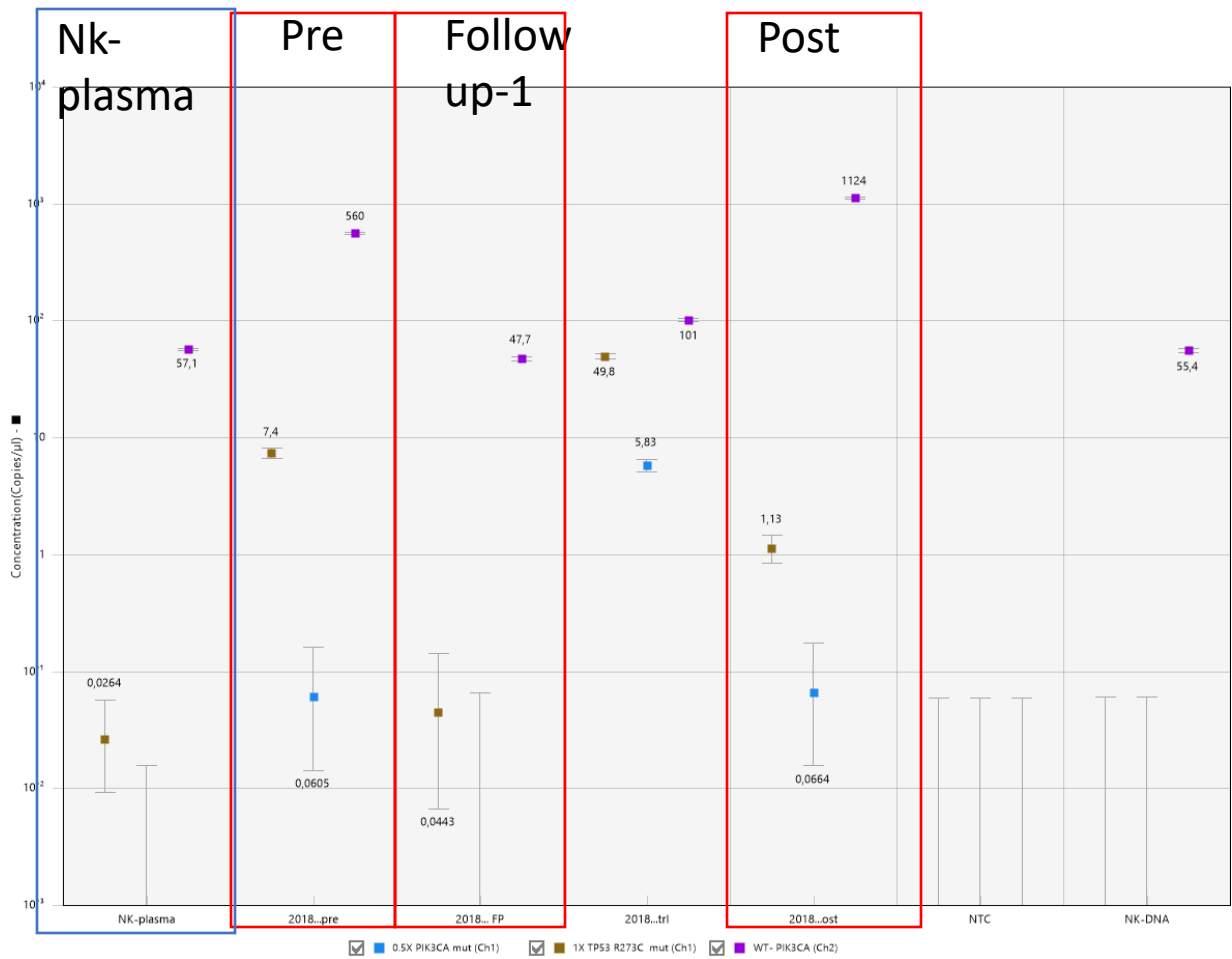

Calling – Pre-op- positive for –PIK3CA and TP53 R273C  
Post-op- positive for PIK3CA and TP53 R273C  
Follow-up- negative for PIK3CA and TP53 R273C

Post 10X dilution

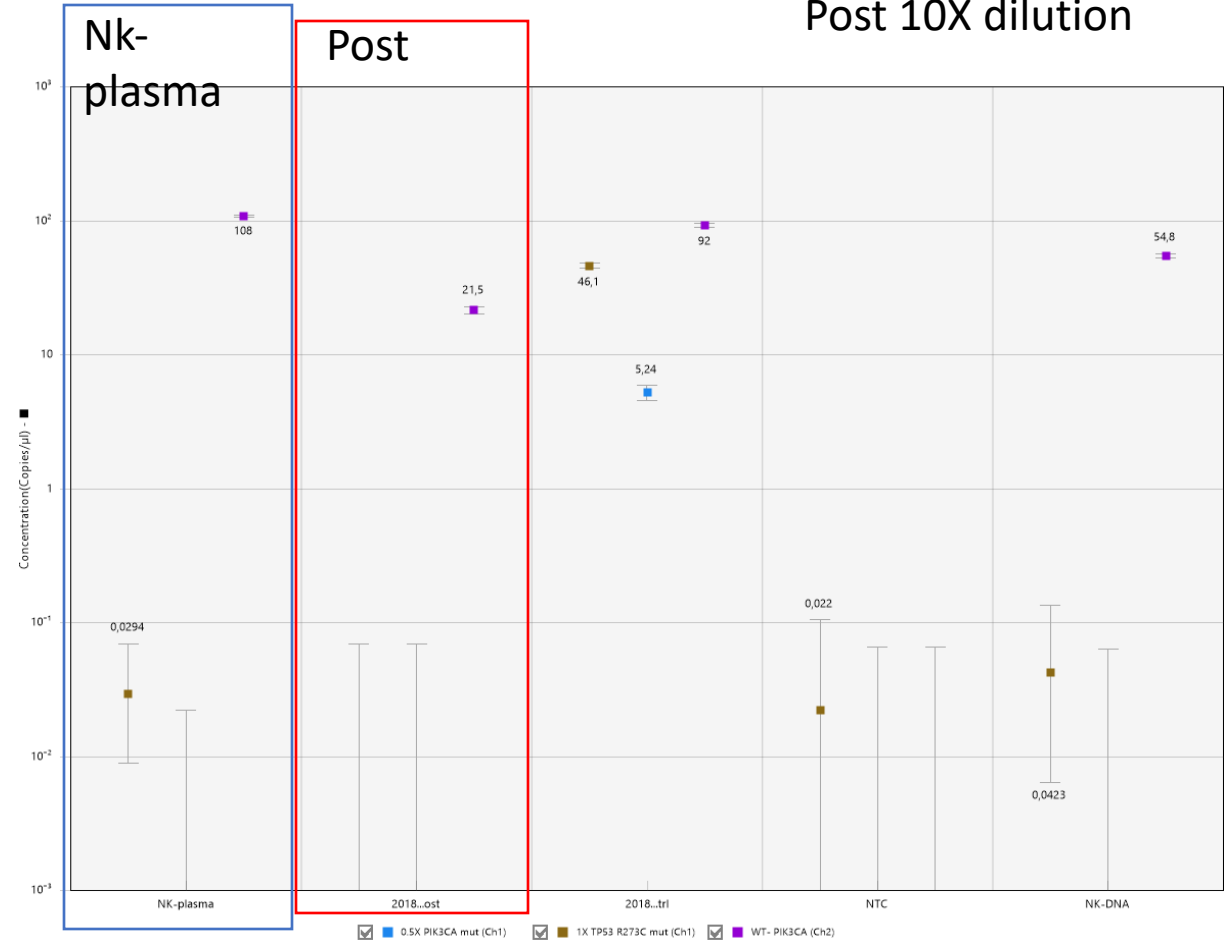

Calling – After dilution  
Post-op- negative for PIK3CA and TP53 R273C

Assays: 1X KRAS, p.G12D mut (FAM) and 1X KRAS WT, p.G12D (HEX)

KRAS,  
p.G12D  
mut

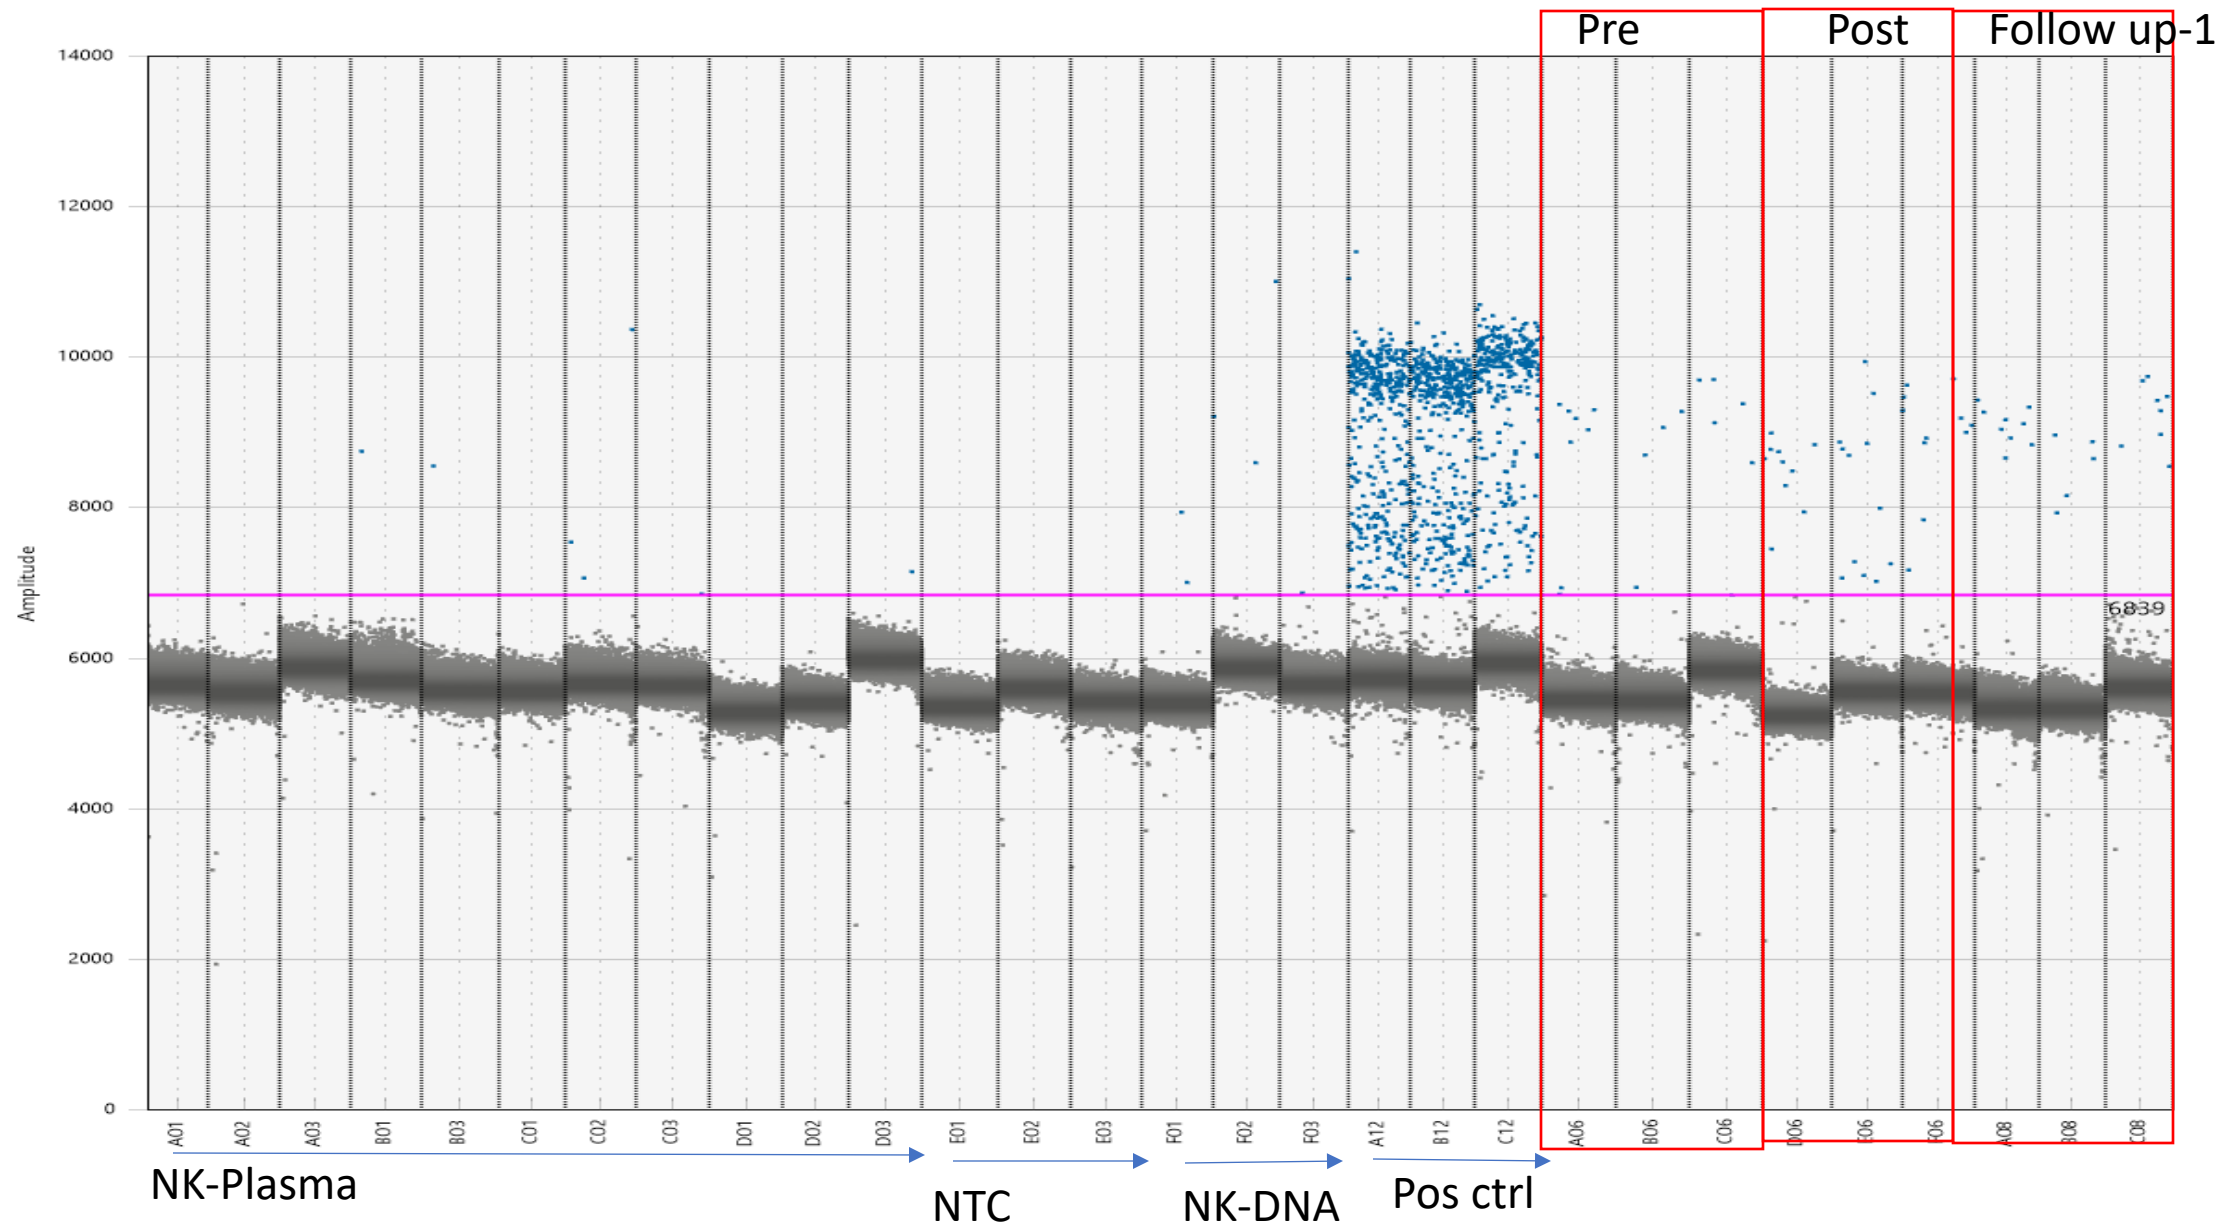

P43 - Final-WT

Gene target : KRAS, p.G12D, c.35G>A

Assay: 1X KRAS WT, p.G12D (HEX)

KRAS WT,  
p.G12D

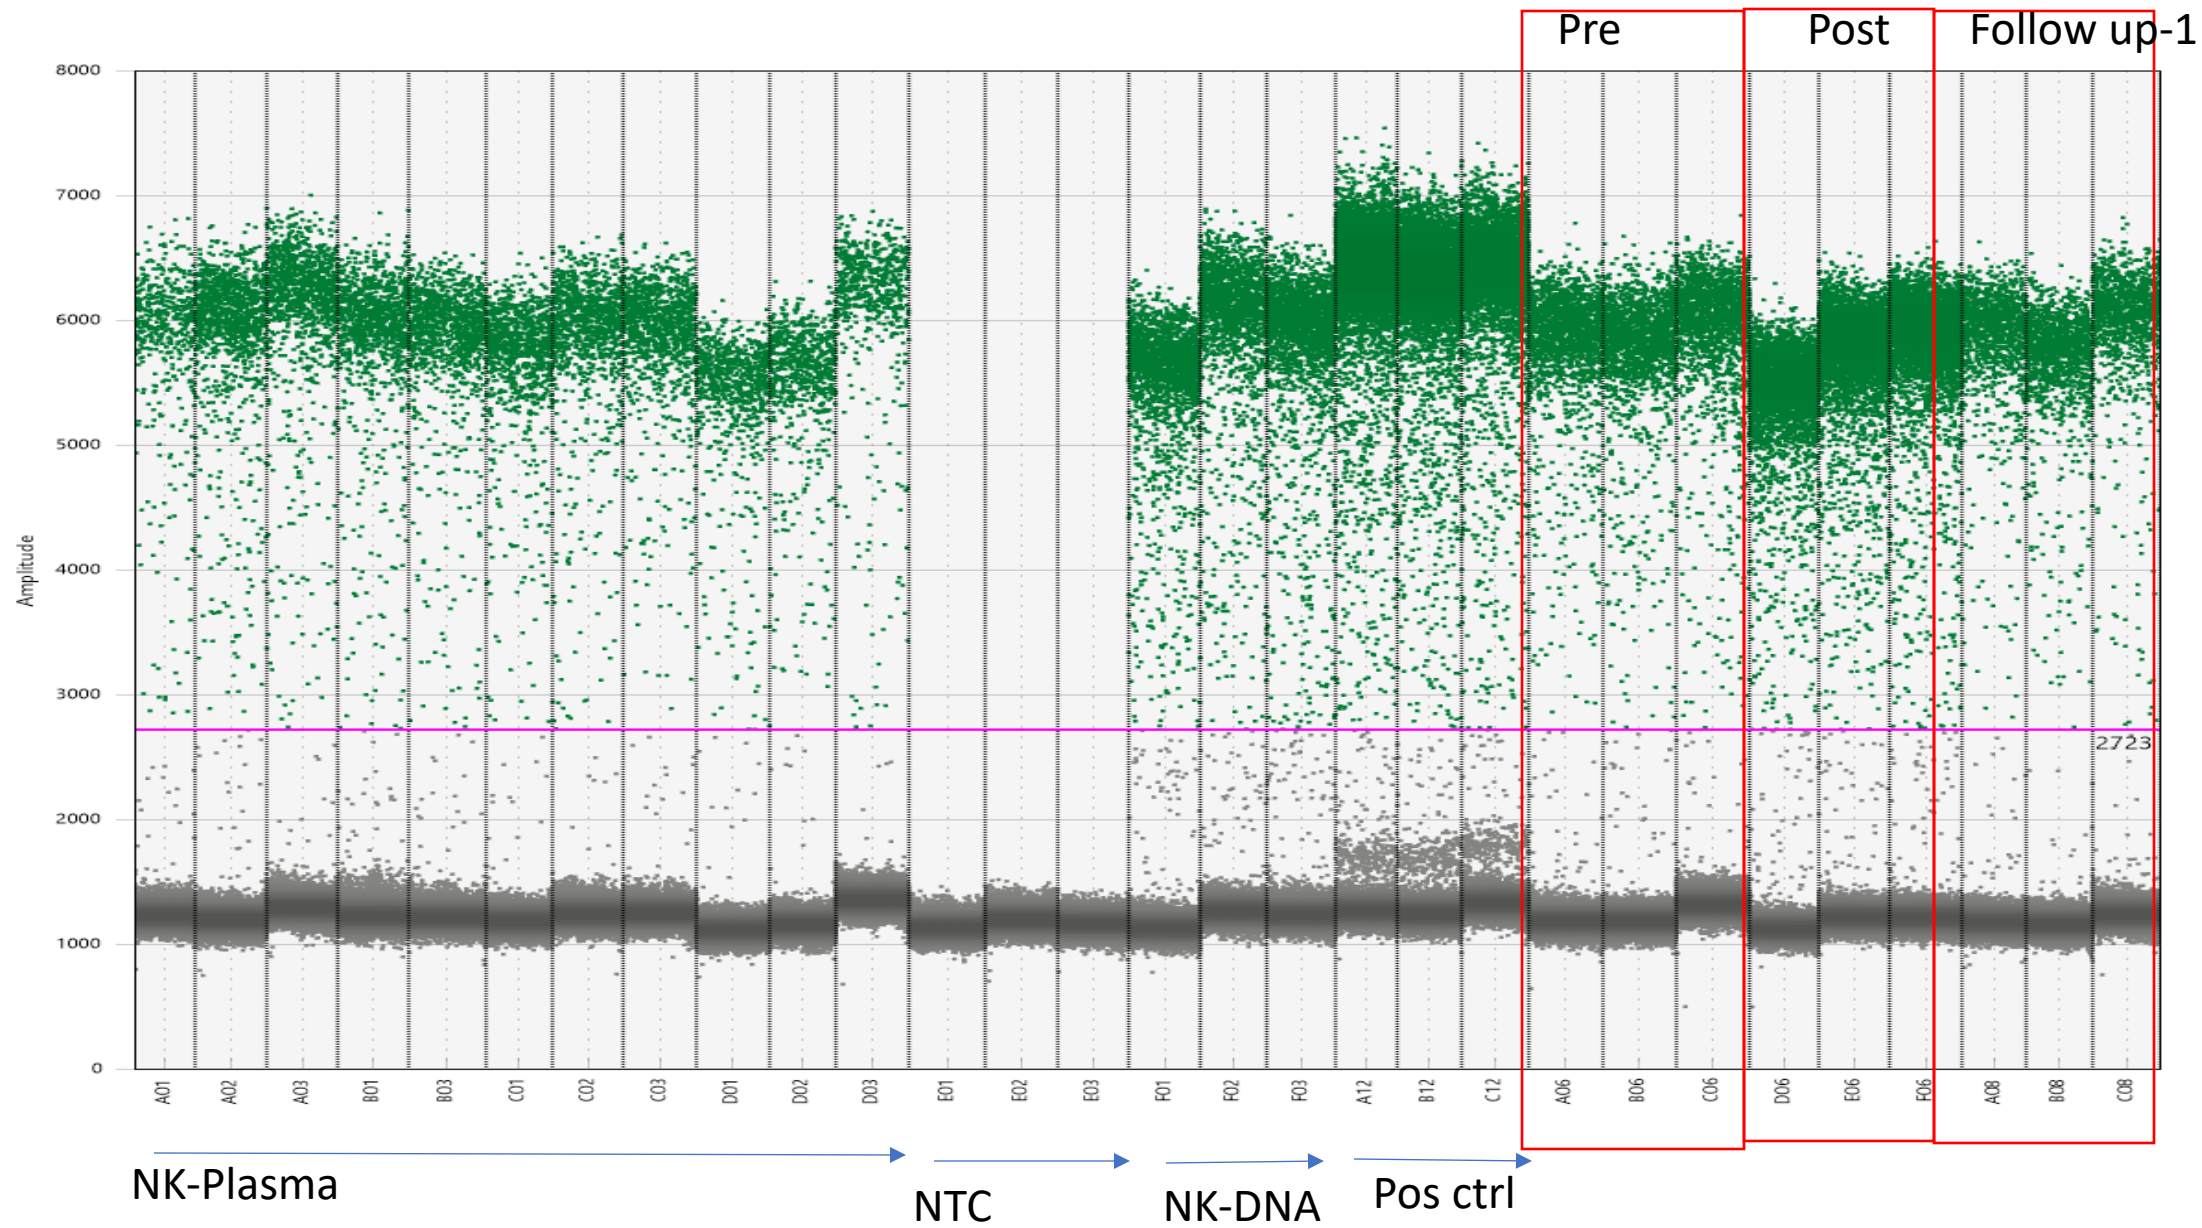

Positive – control

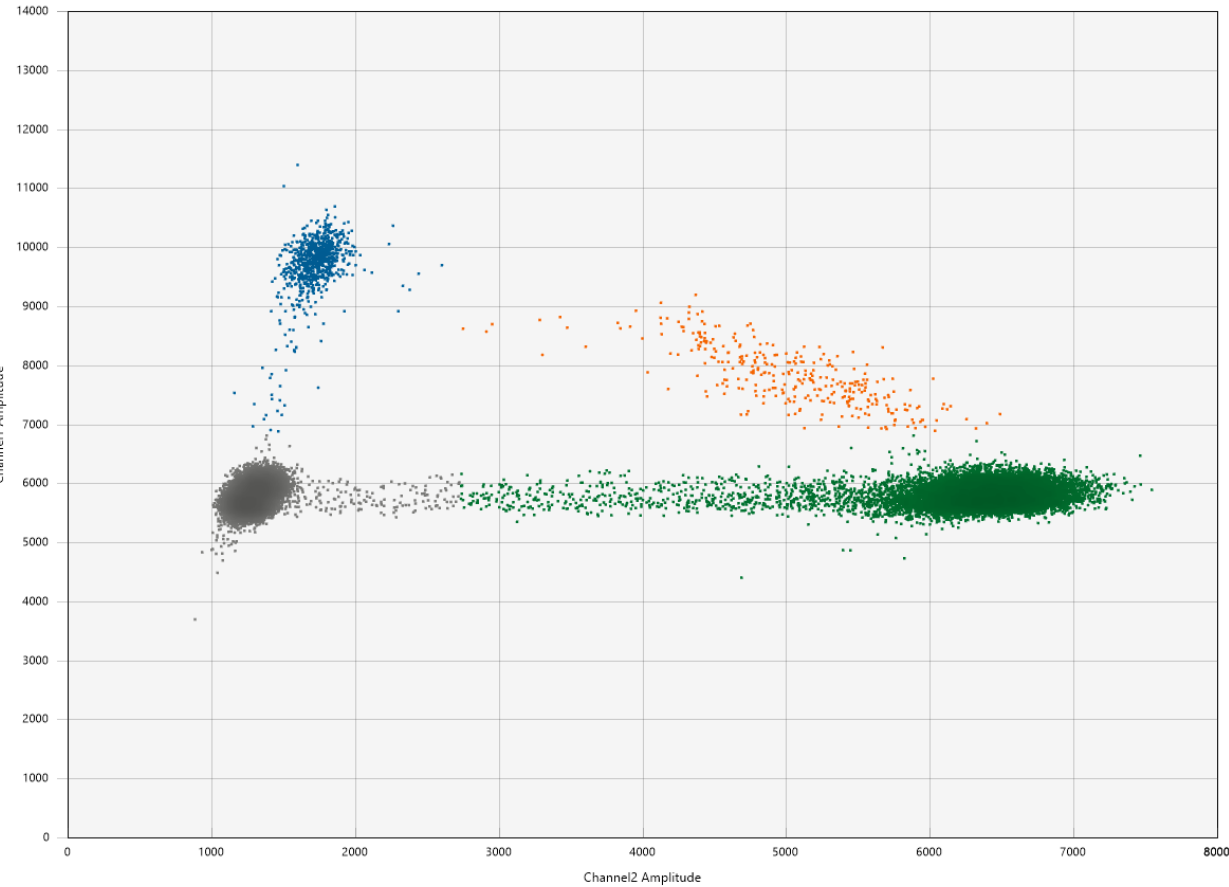

NK-Plasma

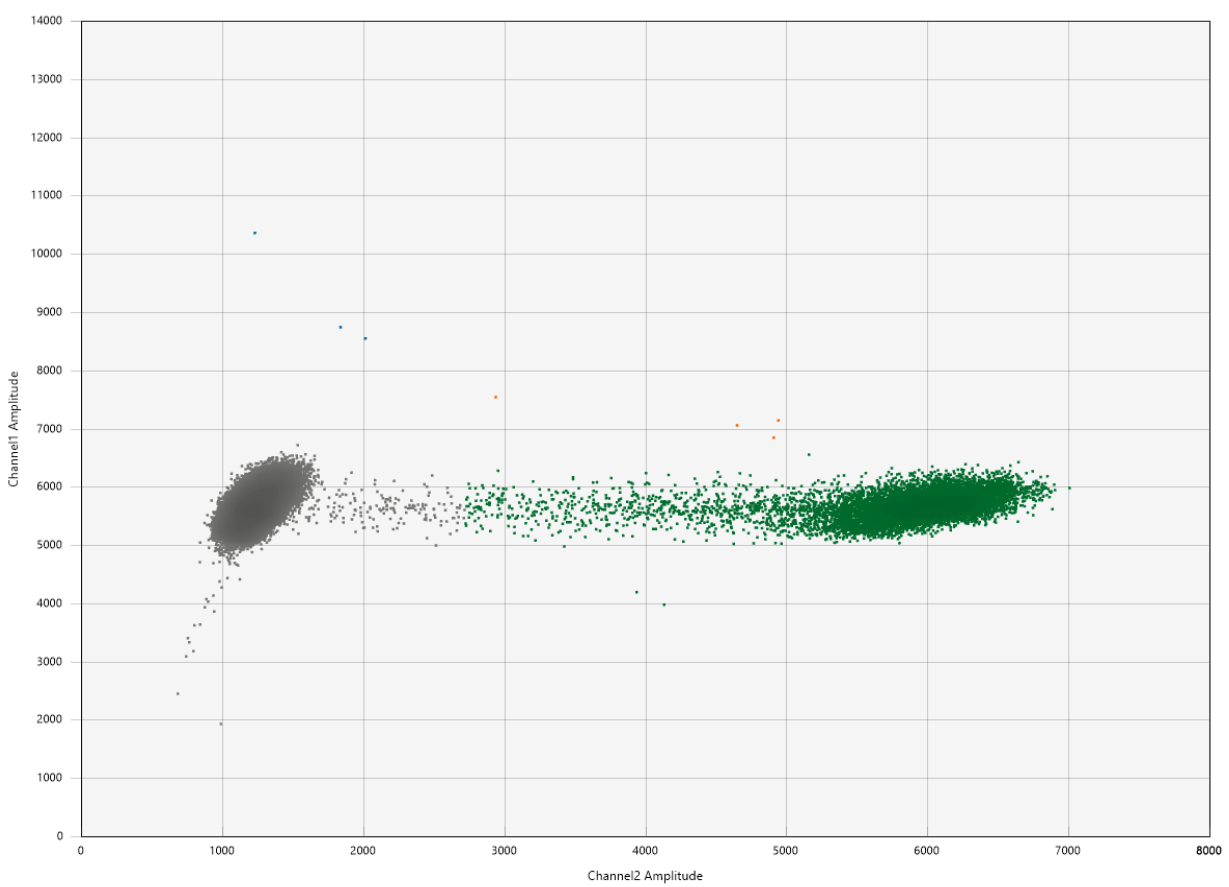

Pre-surgery

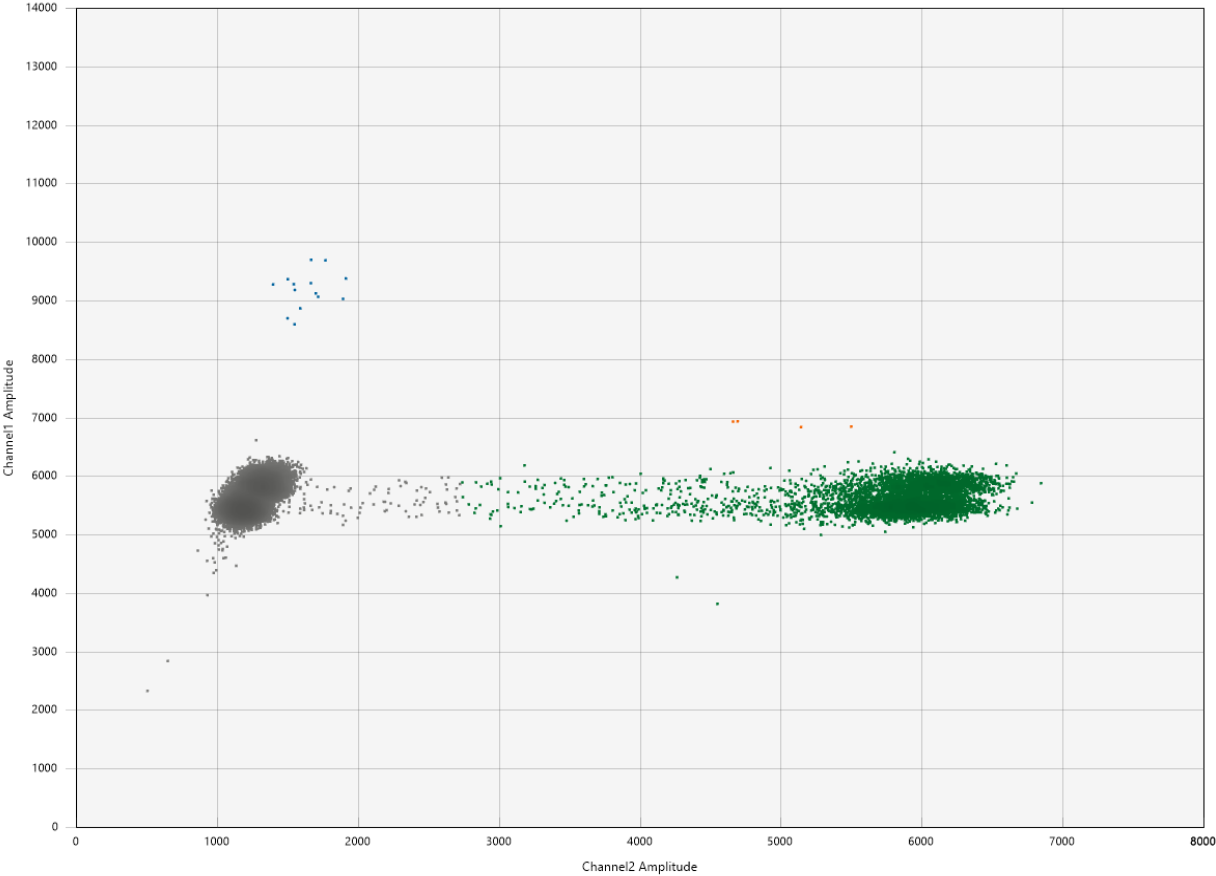

Post-surgery

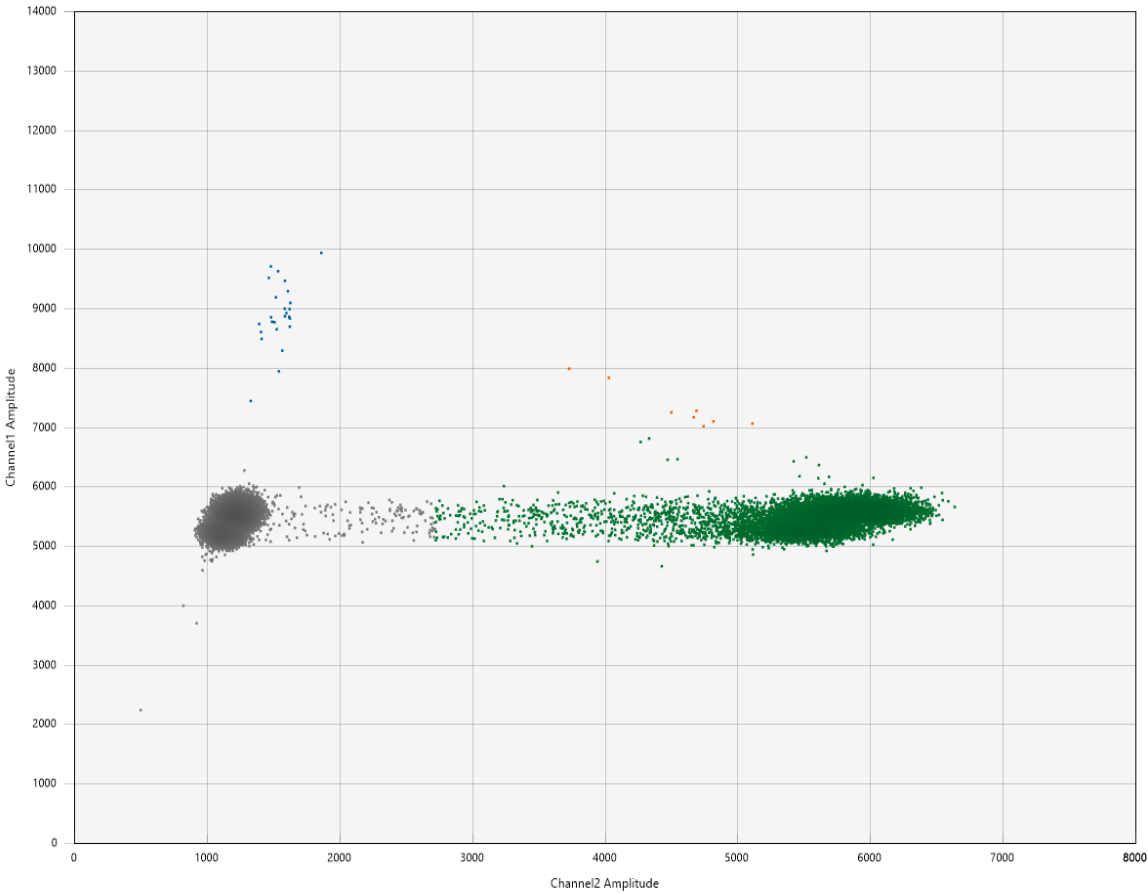

# Follow-up 1

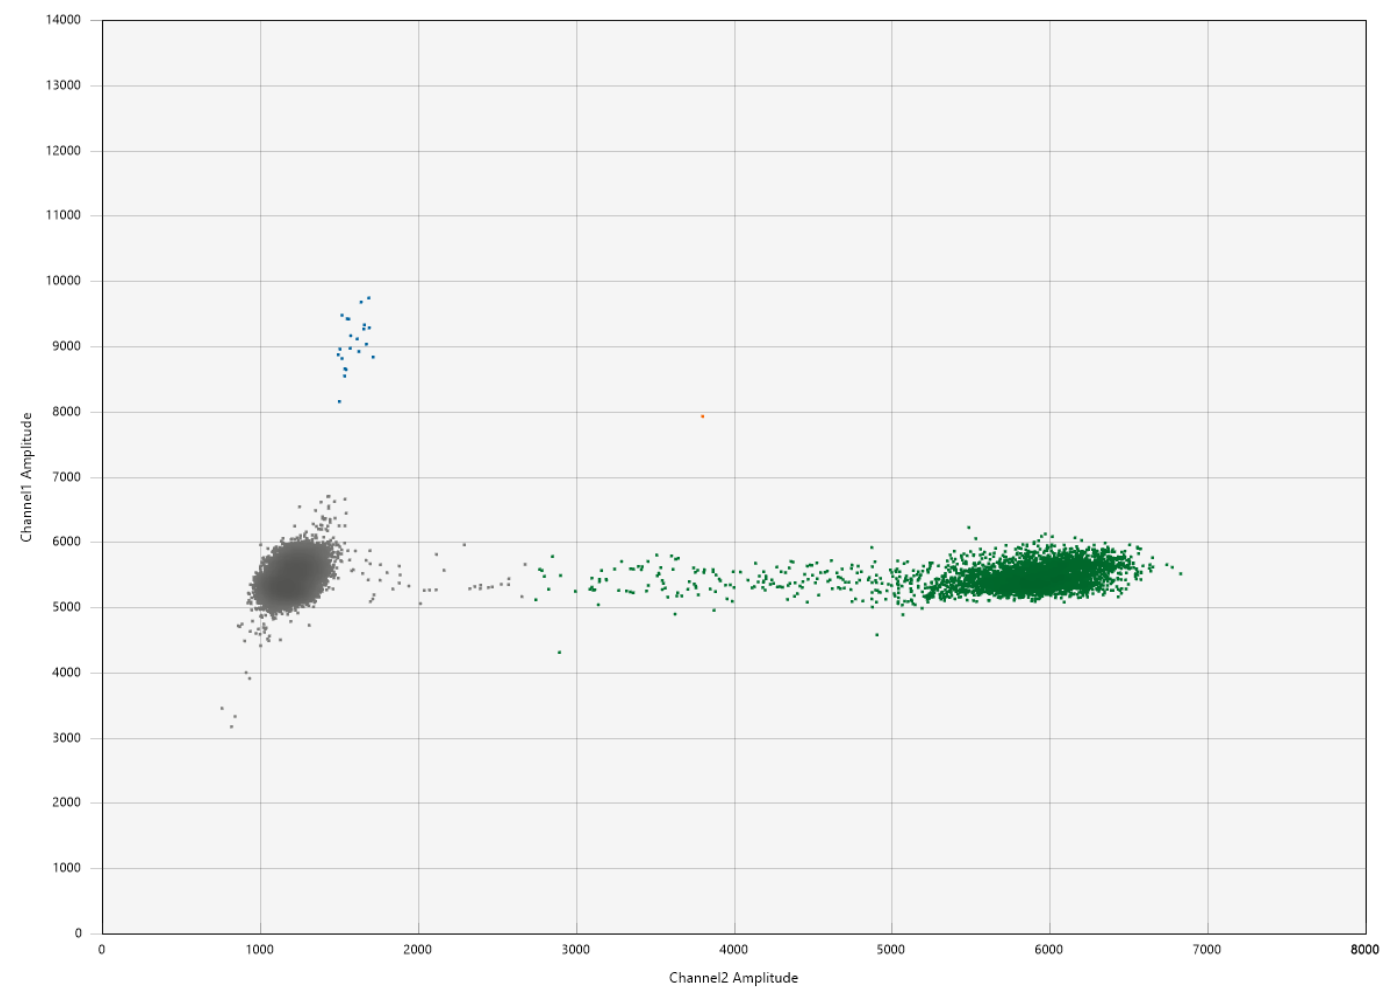

Concentration plots

Pre, post and follow-up

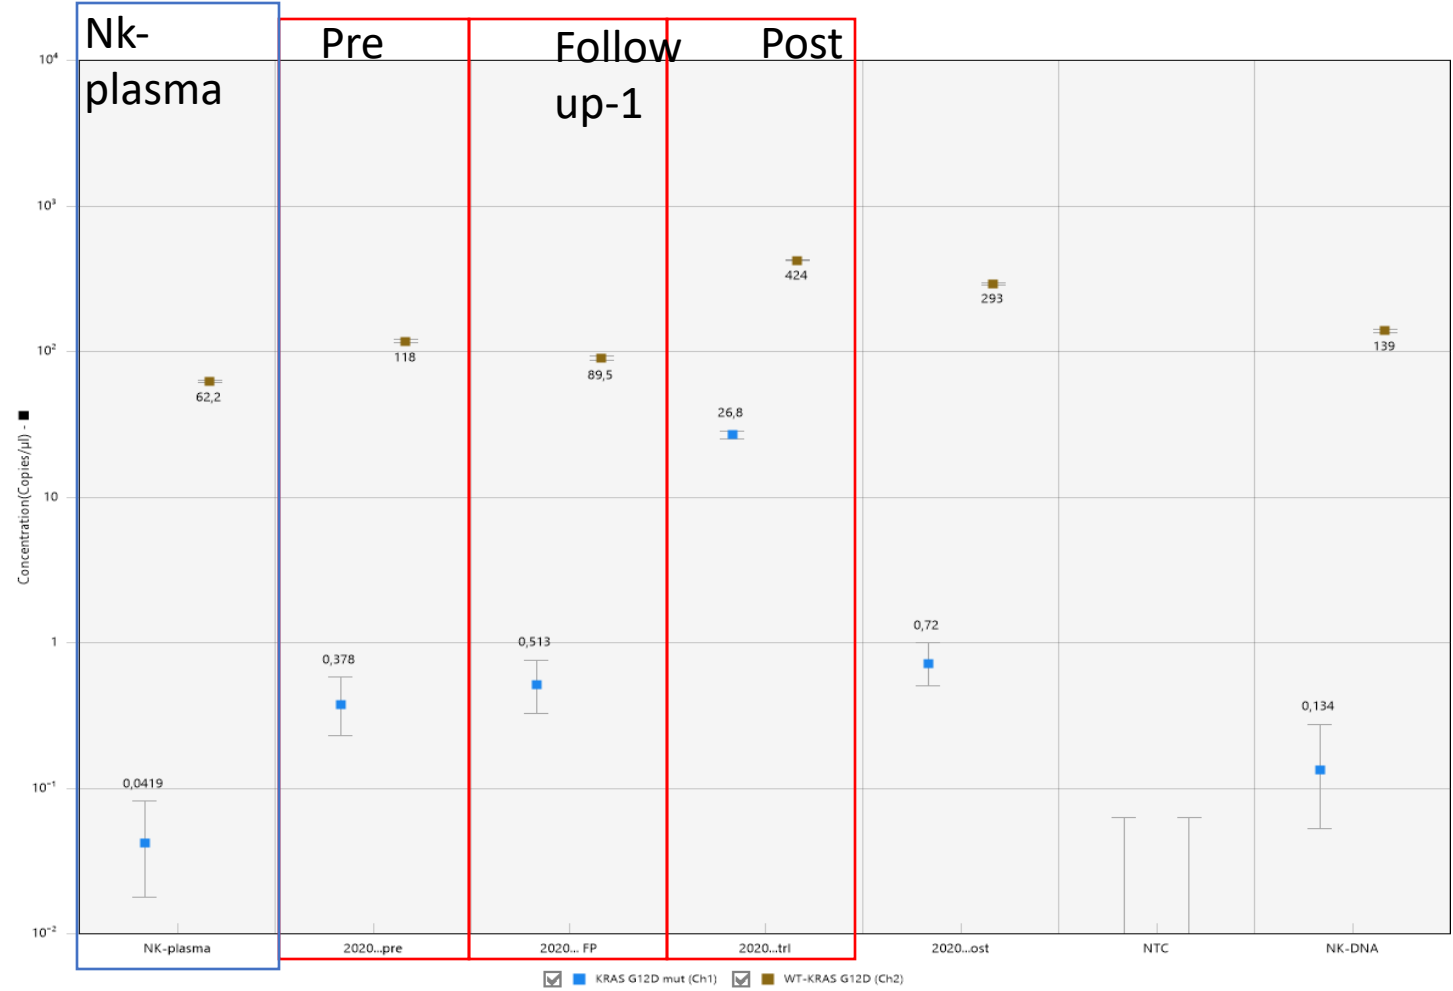

Calling – Pre-op- positive for –KRAS G12D  
Post-op- positive for KRAS G12D  
Follow-up- positive for KRAS G12D

Assays: 1X TP53, p.R248W mut (FAM) and 1X TP53 WT, p.R248W (HEX)

1X TP53,  
p.R248W mut

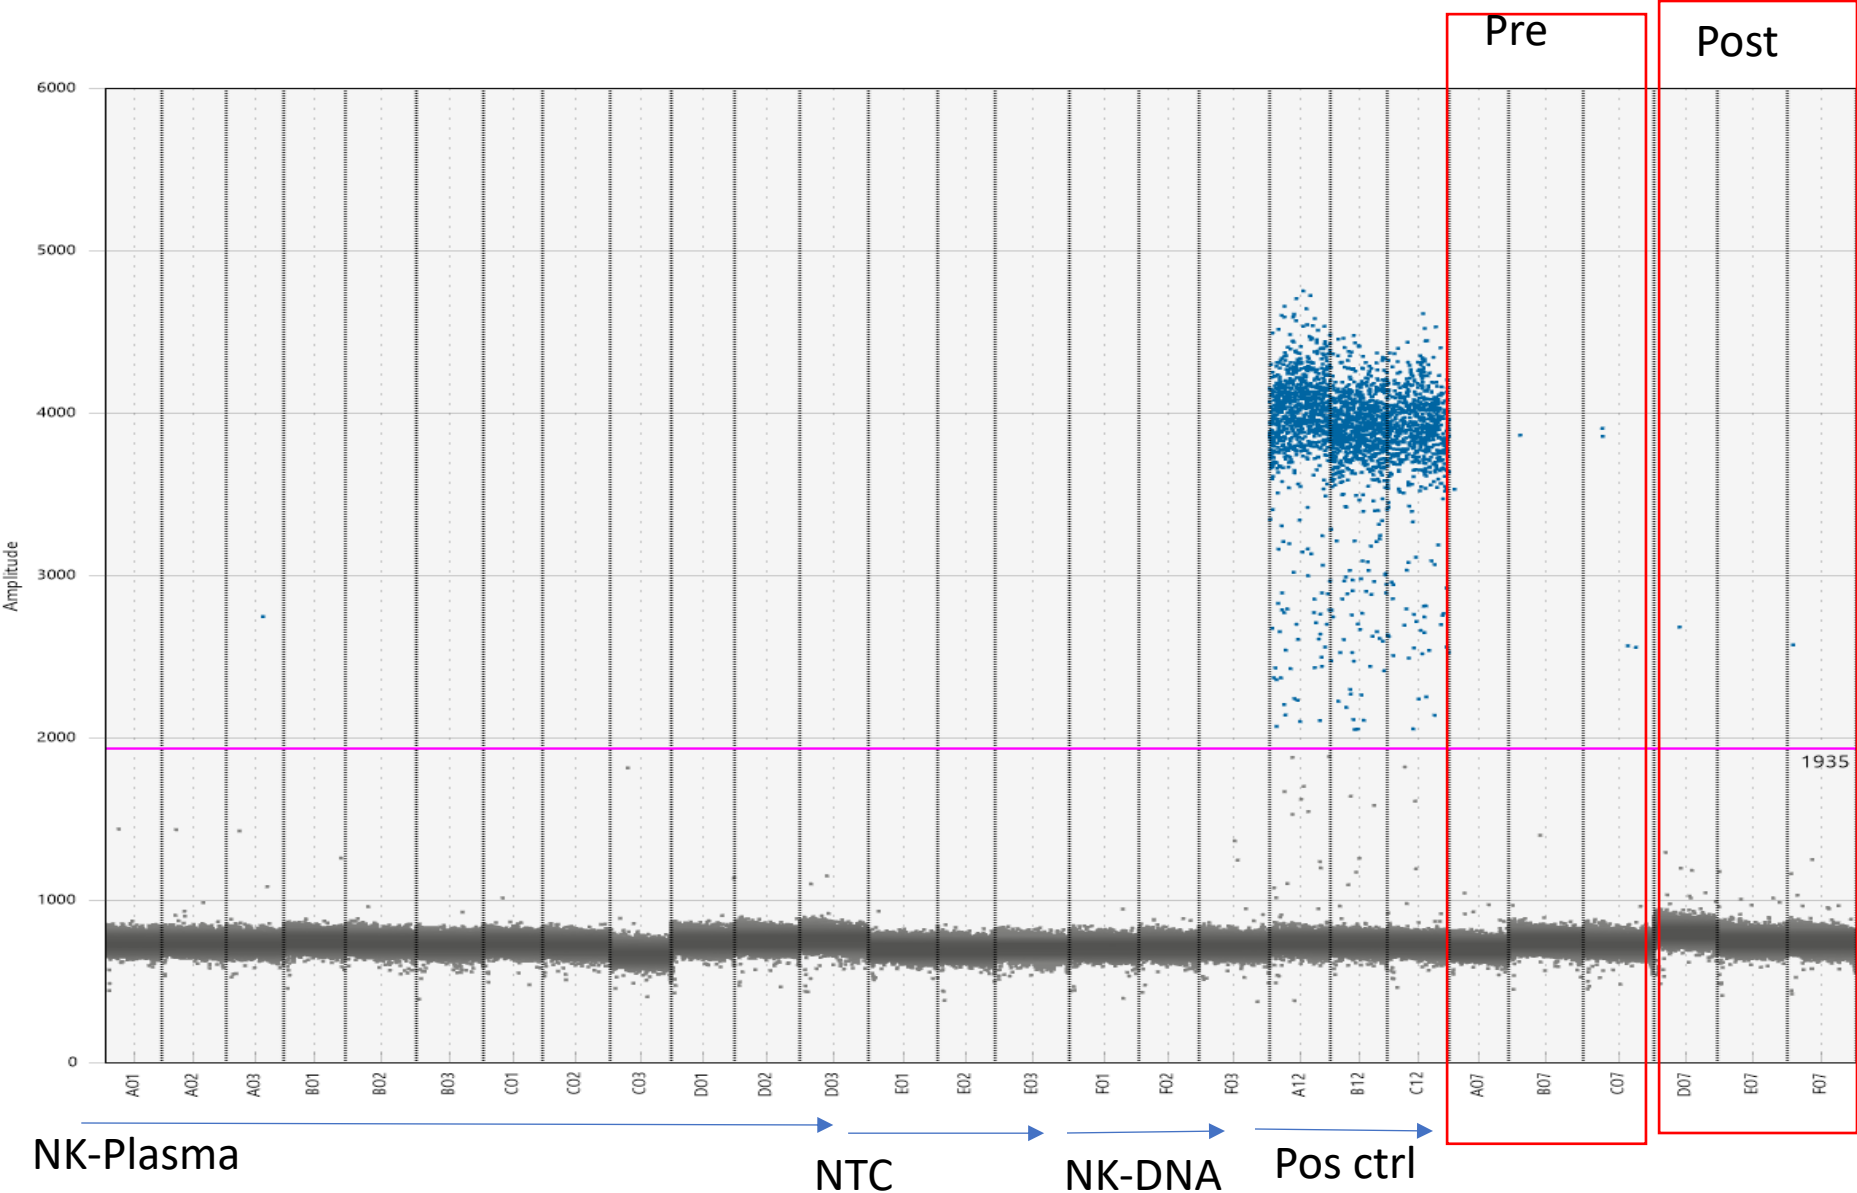

P38 -Final -WT

Gene target :TP53, p.R248W, c.742C>T

Assays: 1X TP53 WT, p.R248W (HEX)

1X TP53 WT,  
p.R248W

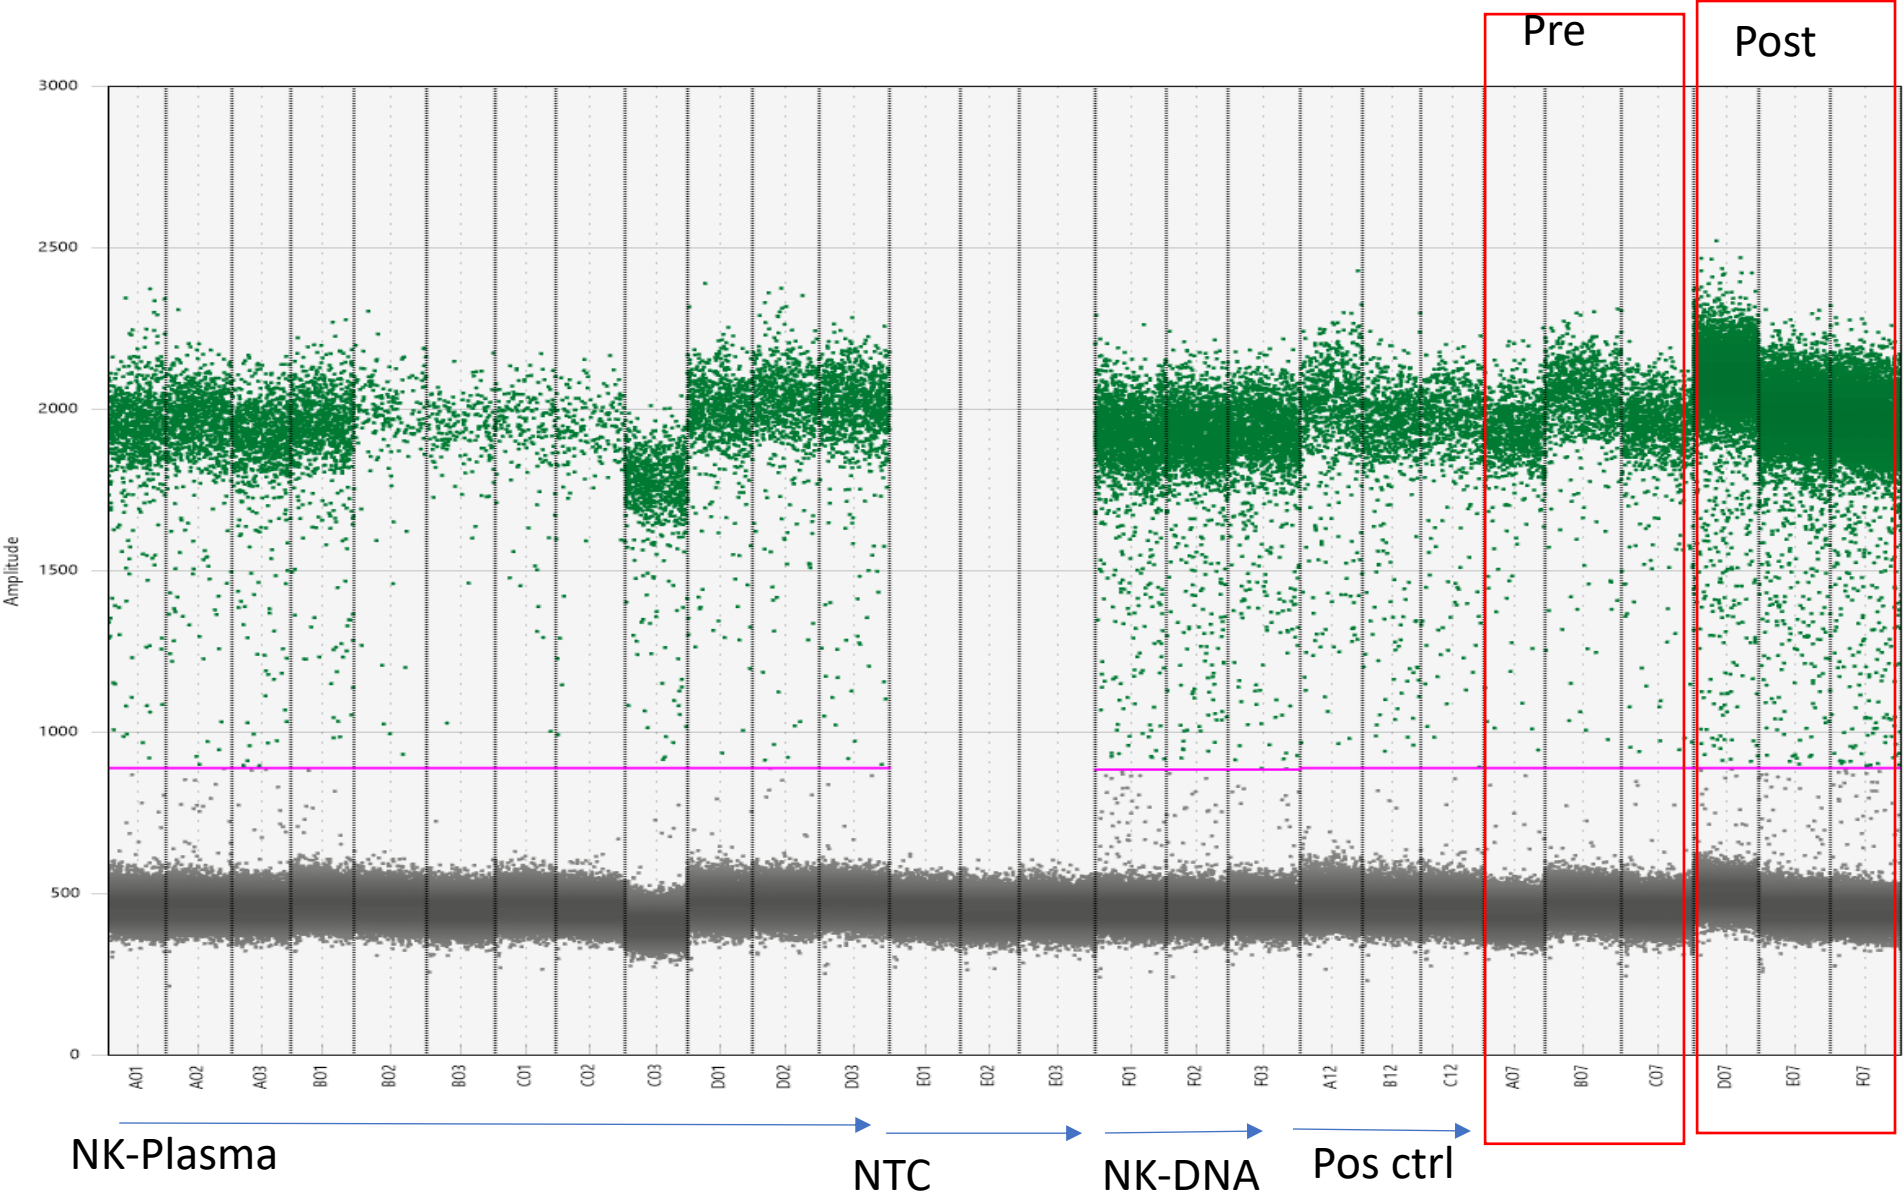

NK-plasma DNA

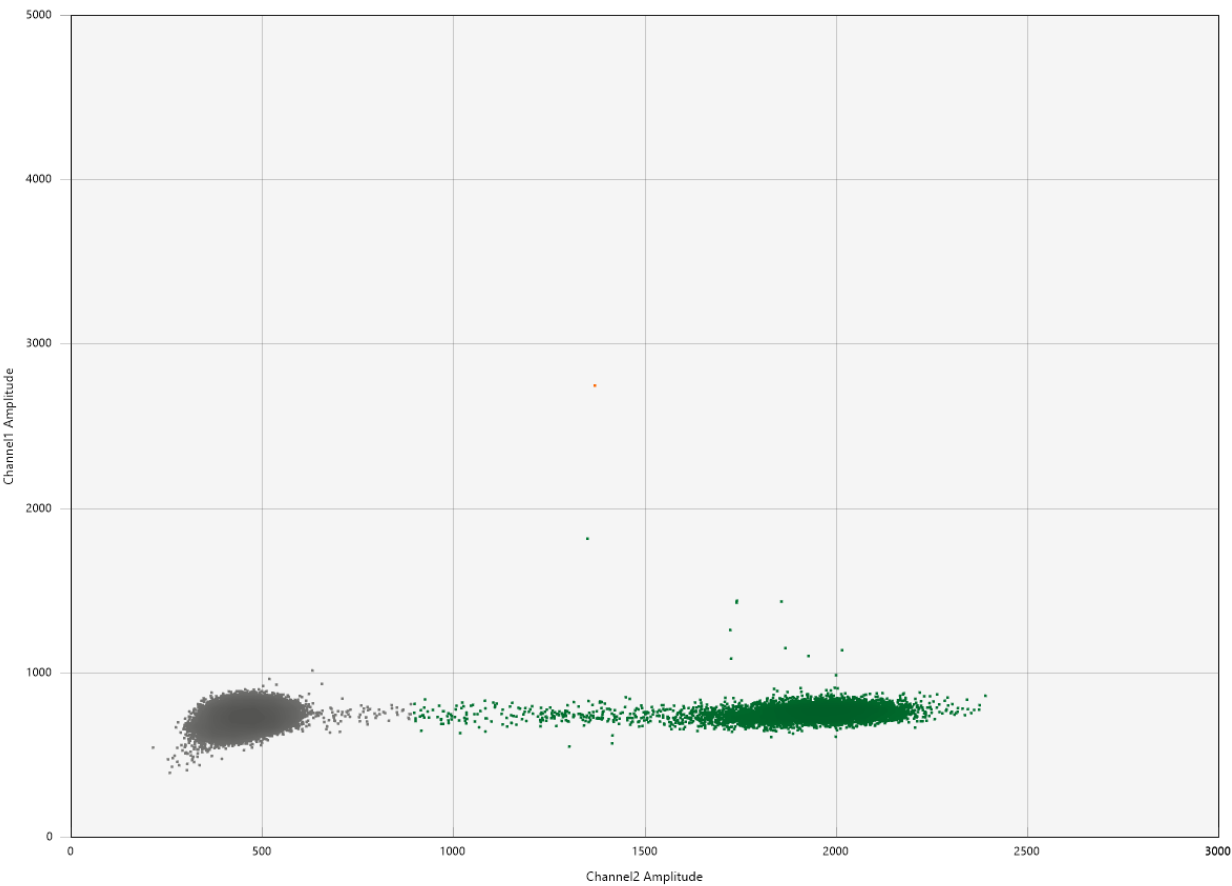

Positive control

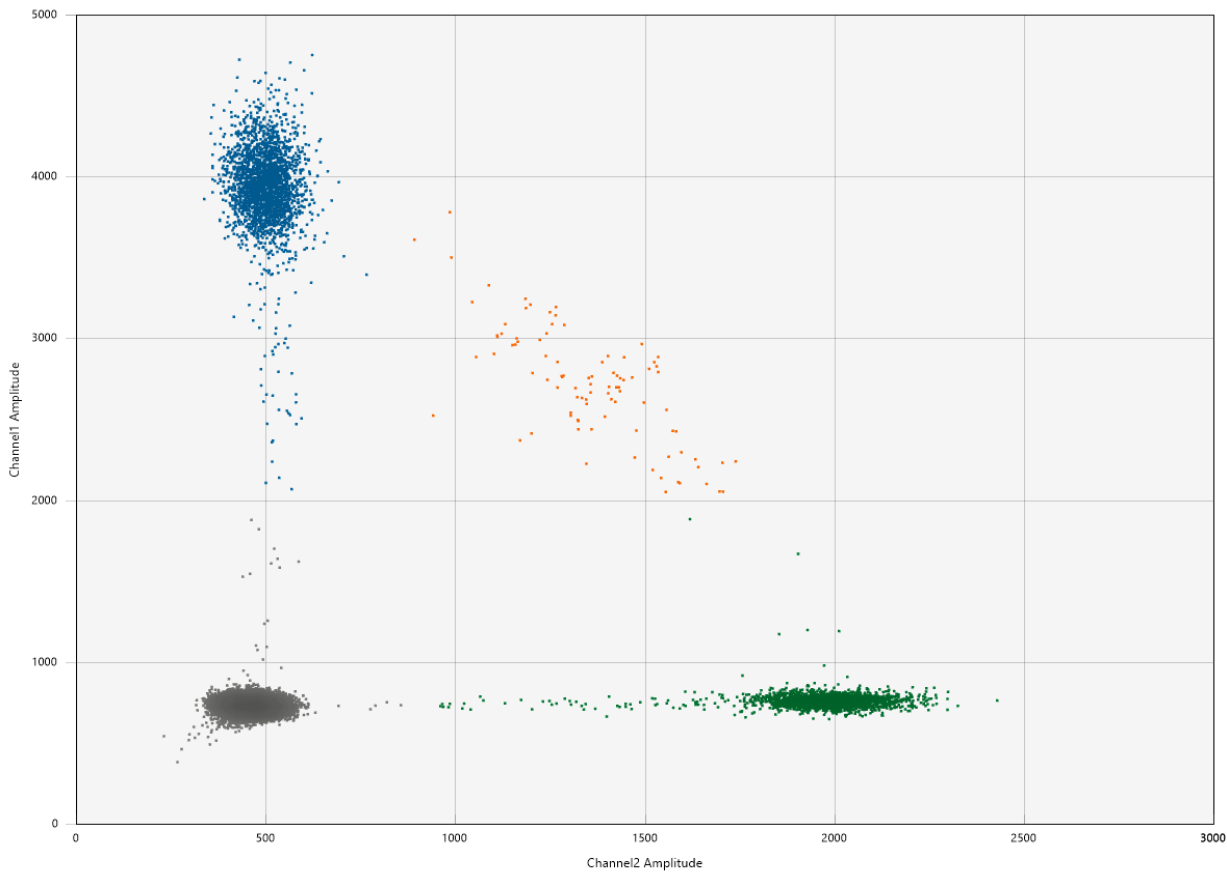

Pre-surgery

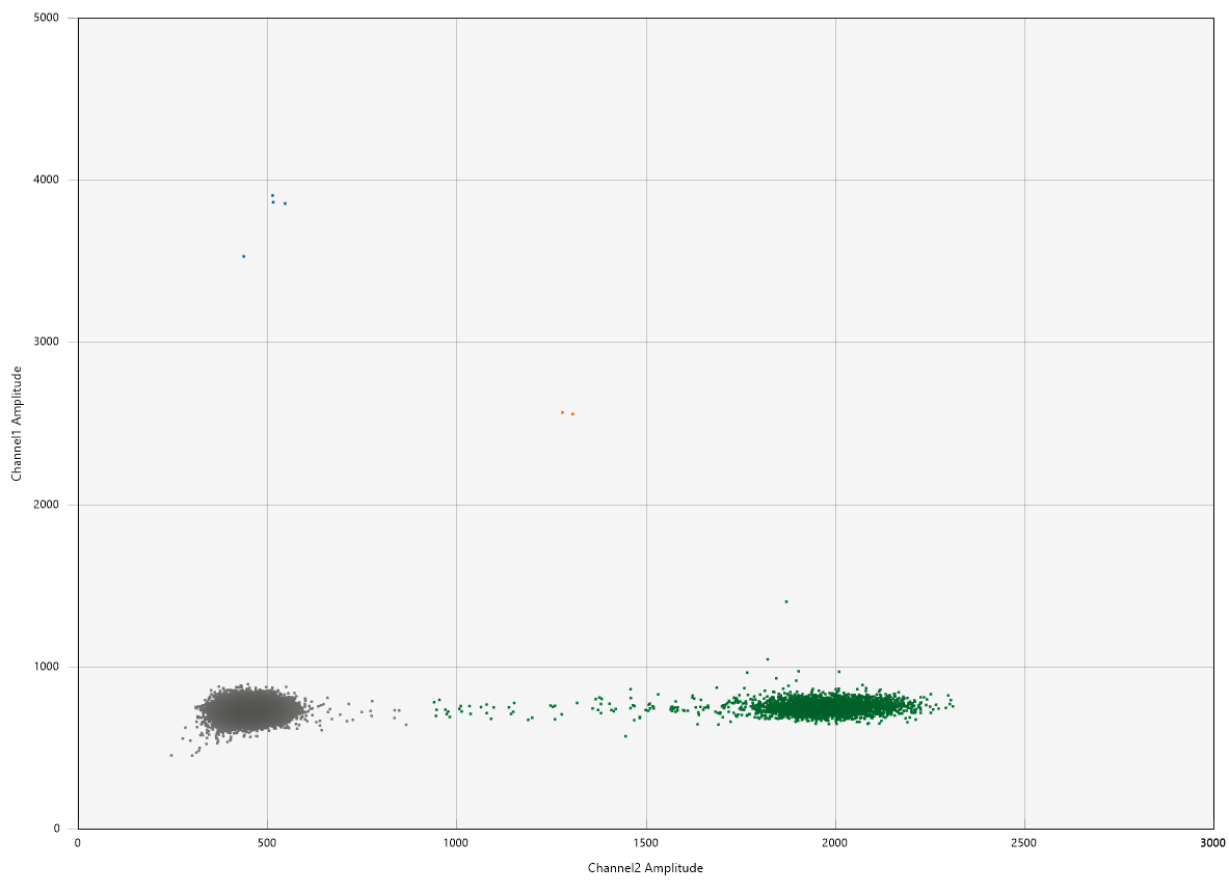

Post-surgery

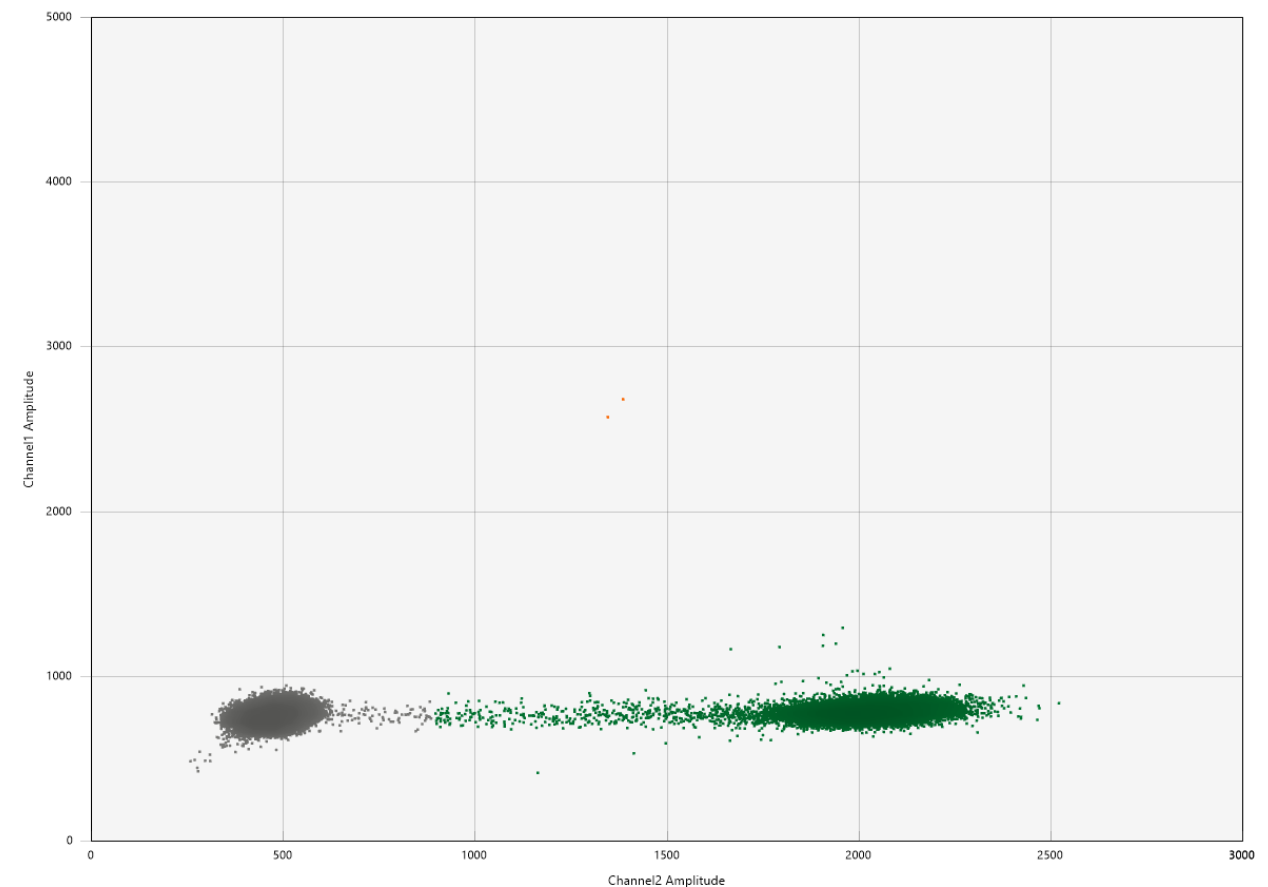

Concentration plots

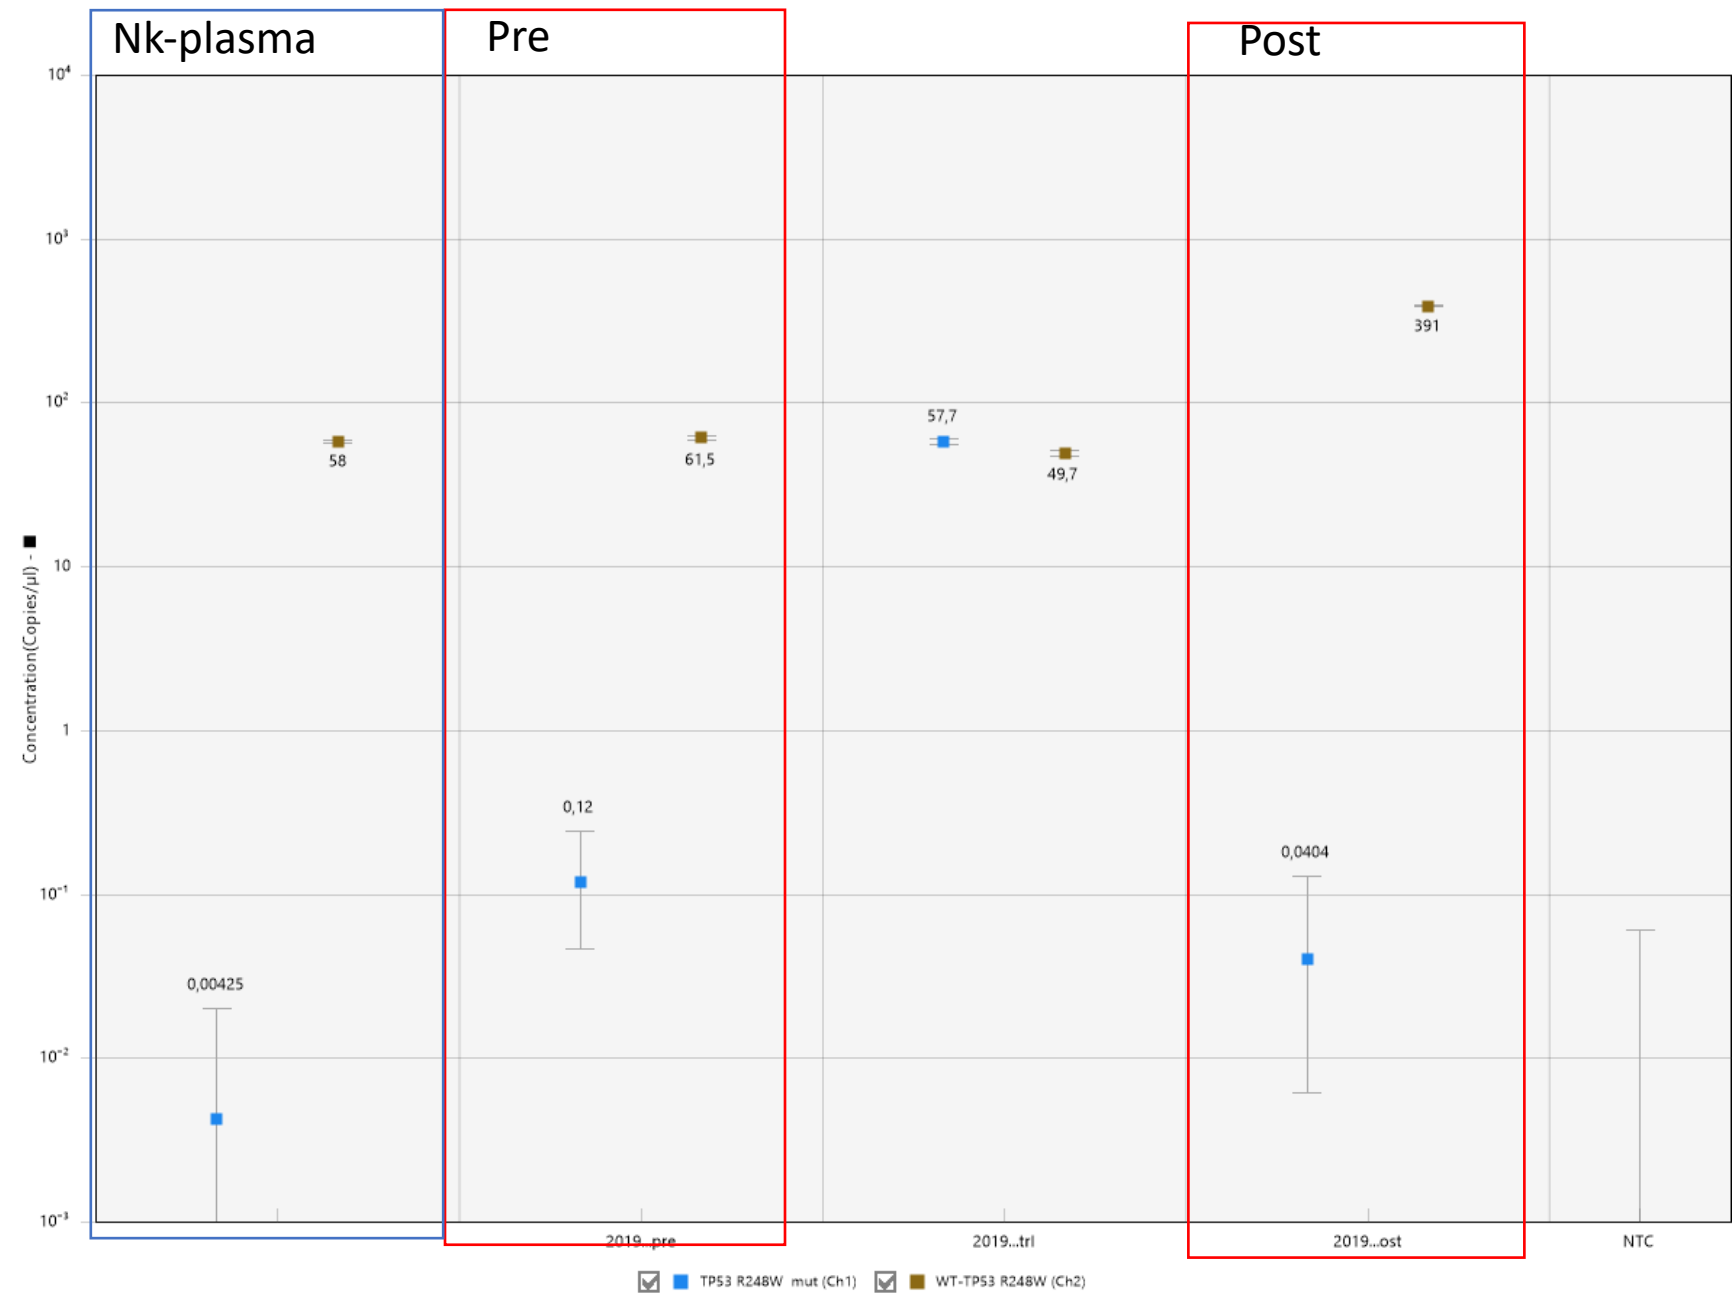

Assays: 1X TP53 ,p.R158fs\*12 mut (FAM) and 1X TP53 WT ,p.R158fs\*12 (HEX)

1X TP53  
,p.R158fs\*12 mut

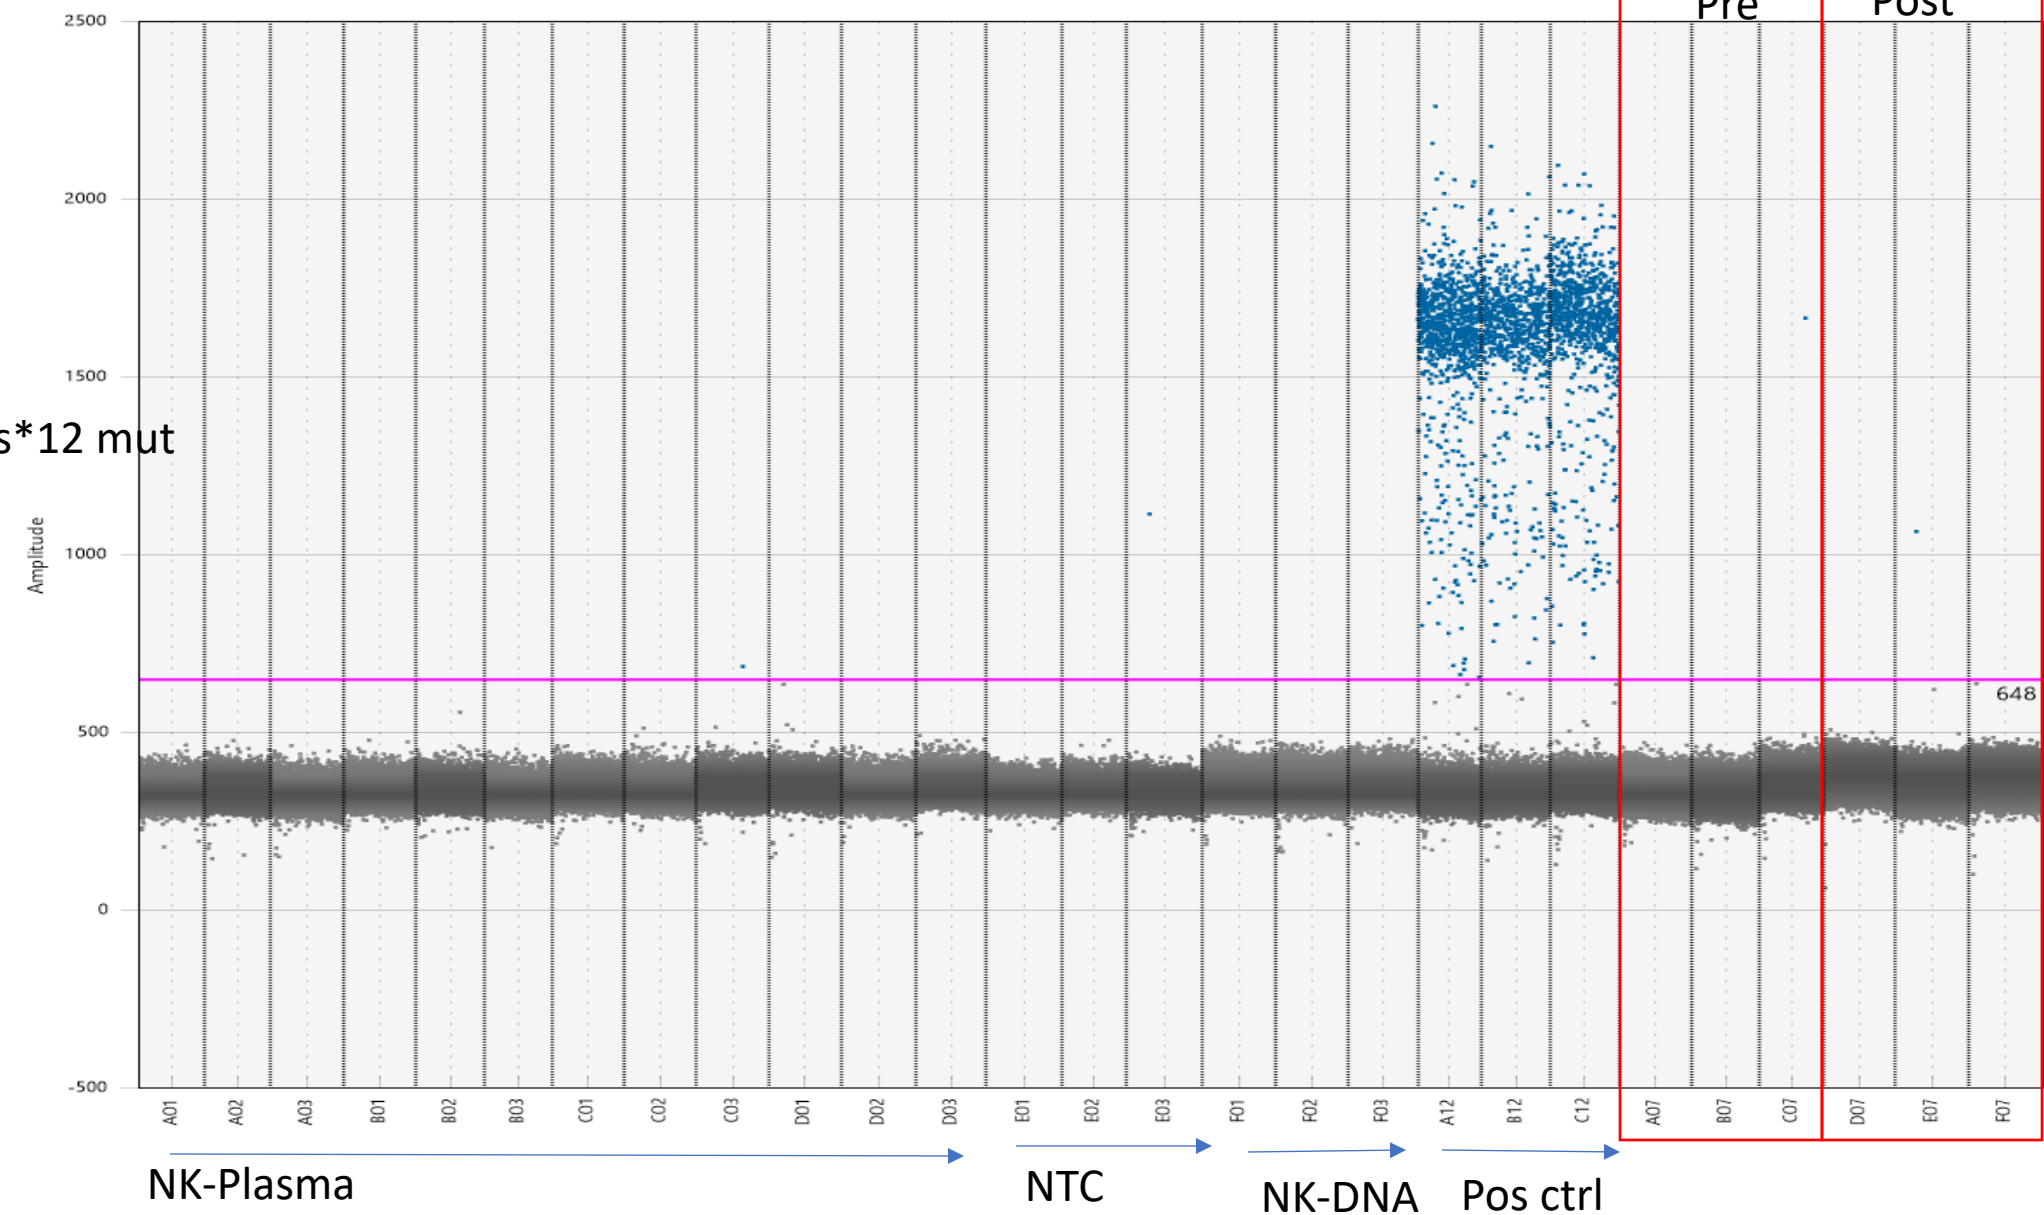

P42 - Final -WT

Gene target : TP53,p.R158fs\*12 , c.472del

Assays: 1X TP53 WT ,p.R158fs\*12 (HEX)

1X TP53  
WT ,p.R158fs\*12

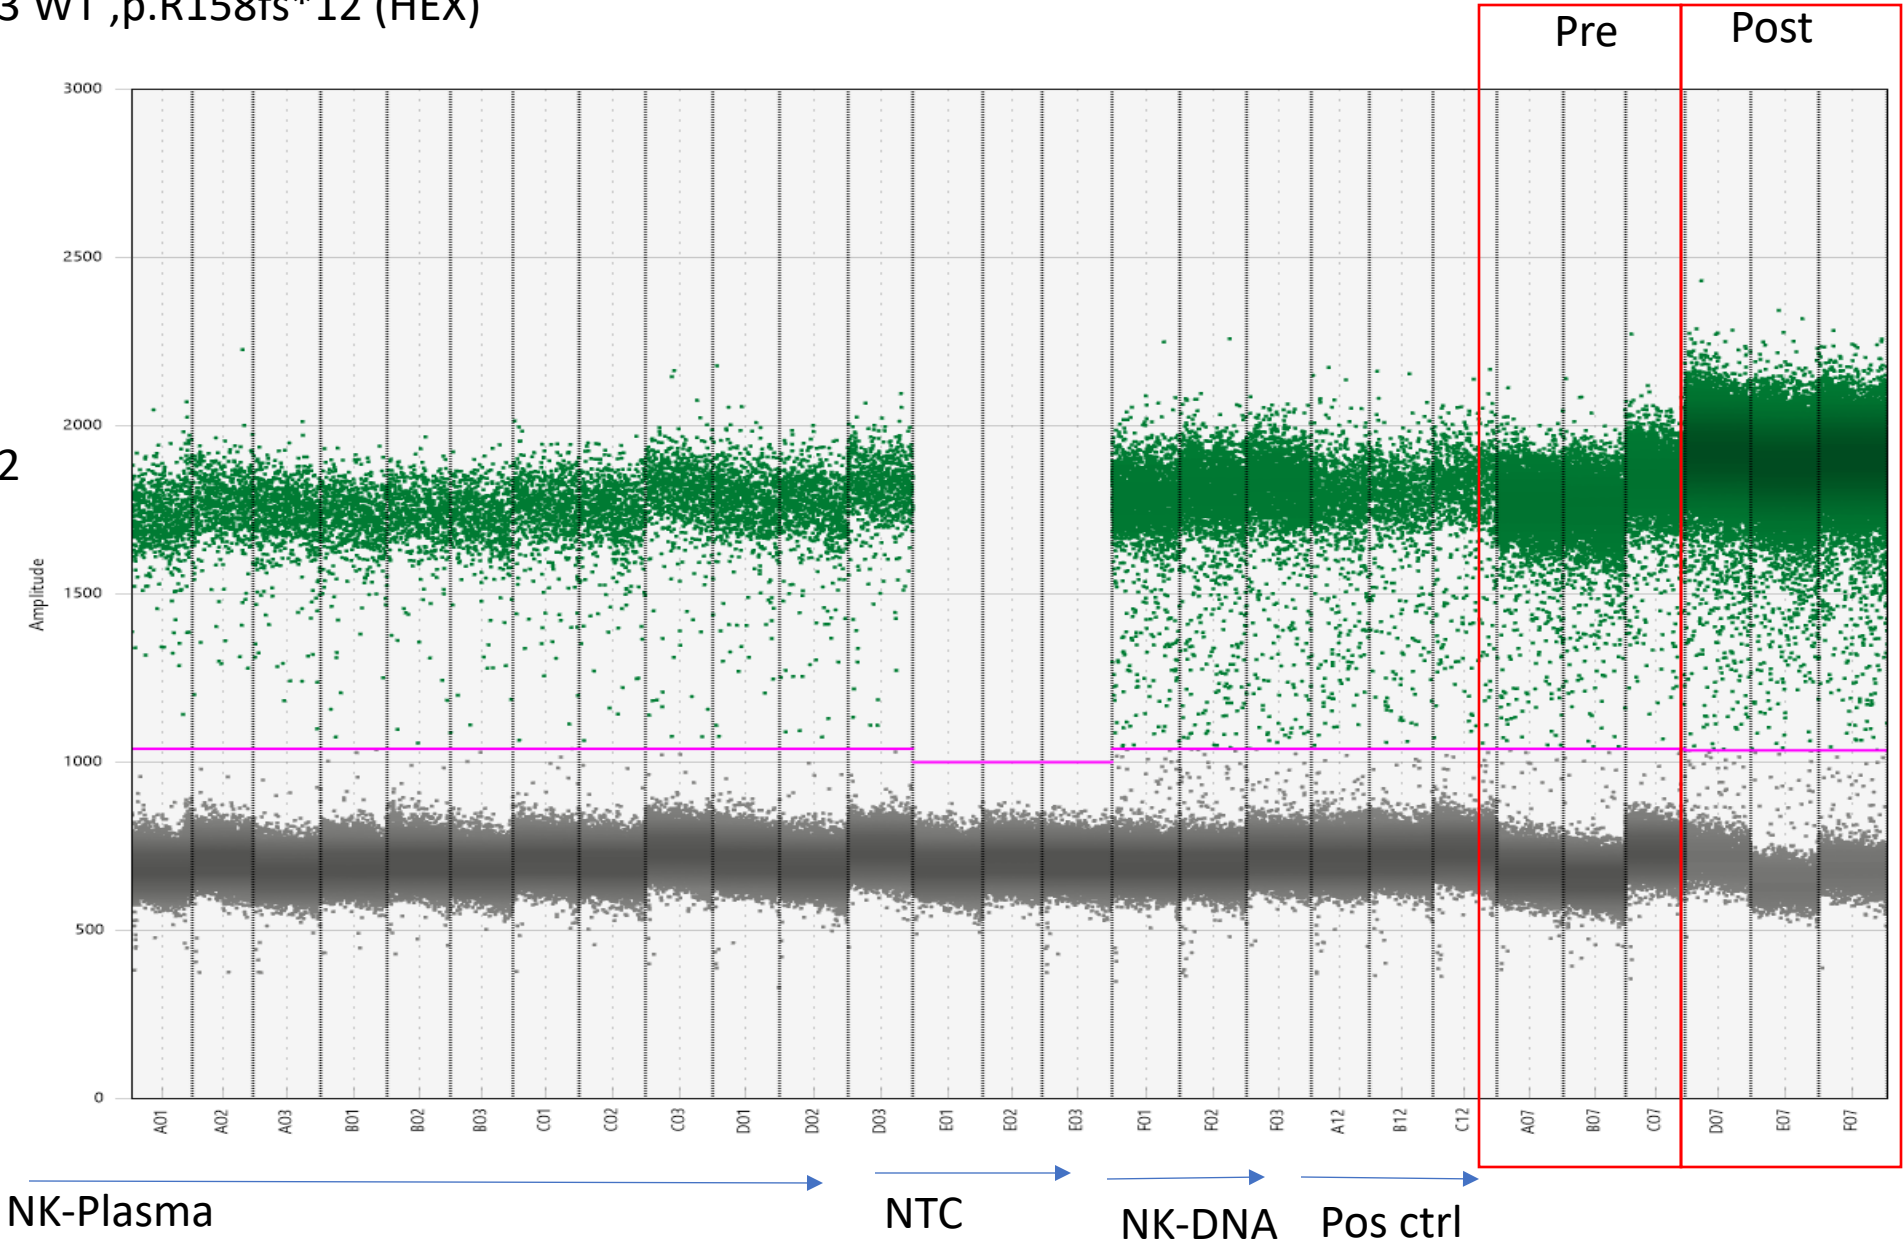

Positive – control

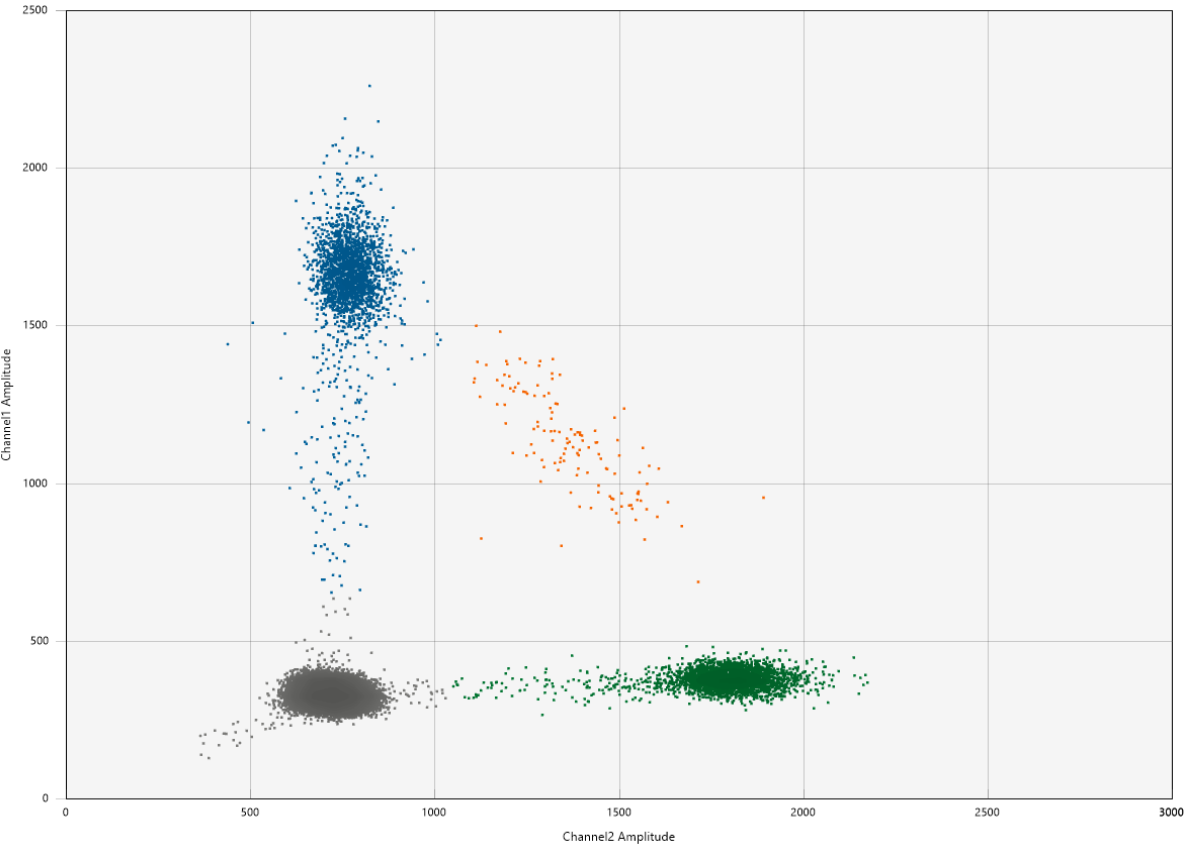

Pre-surgery

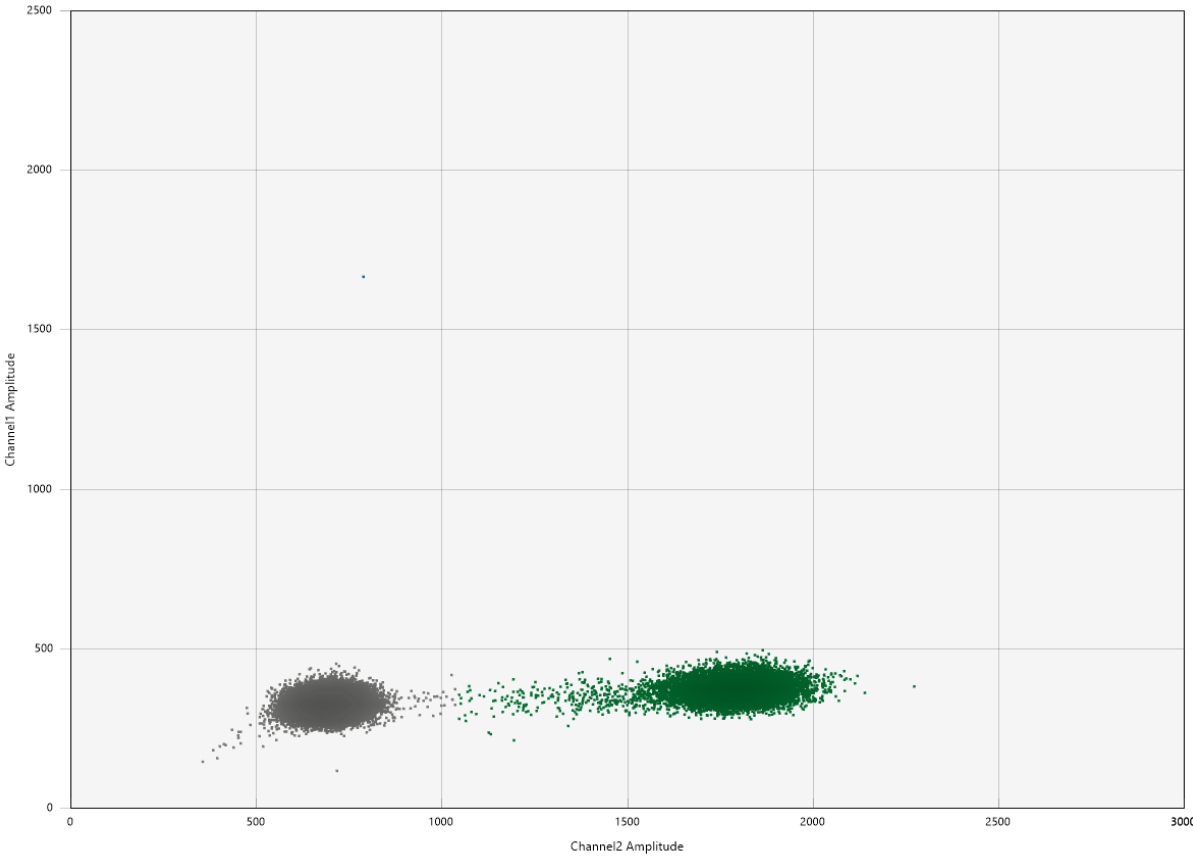

# NK-Plasma

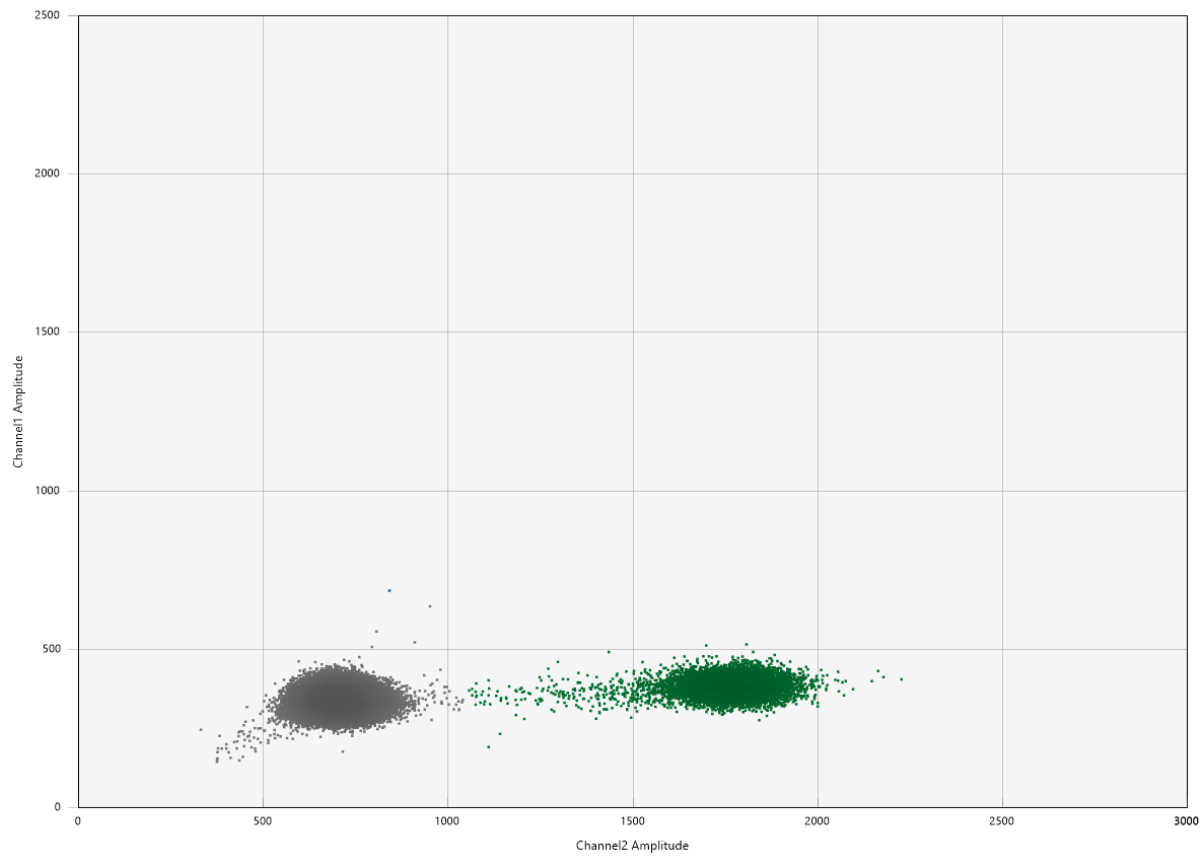

Post-surgery

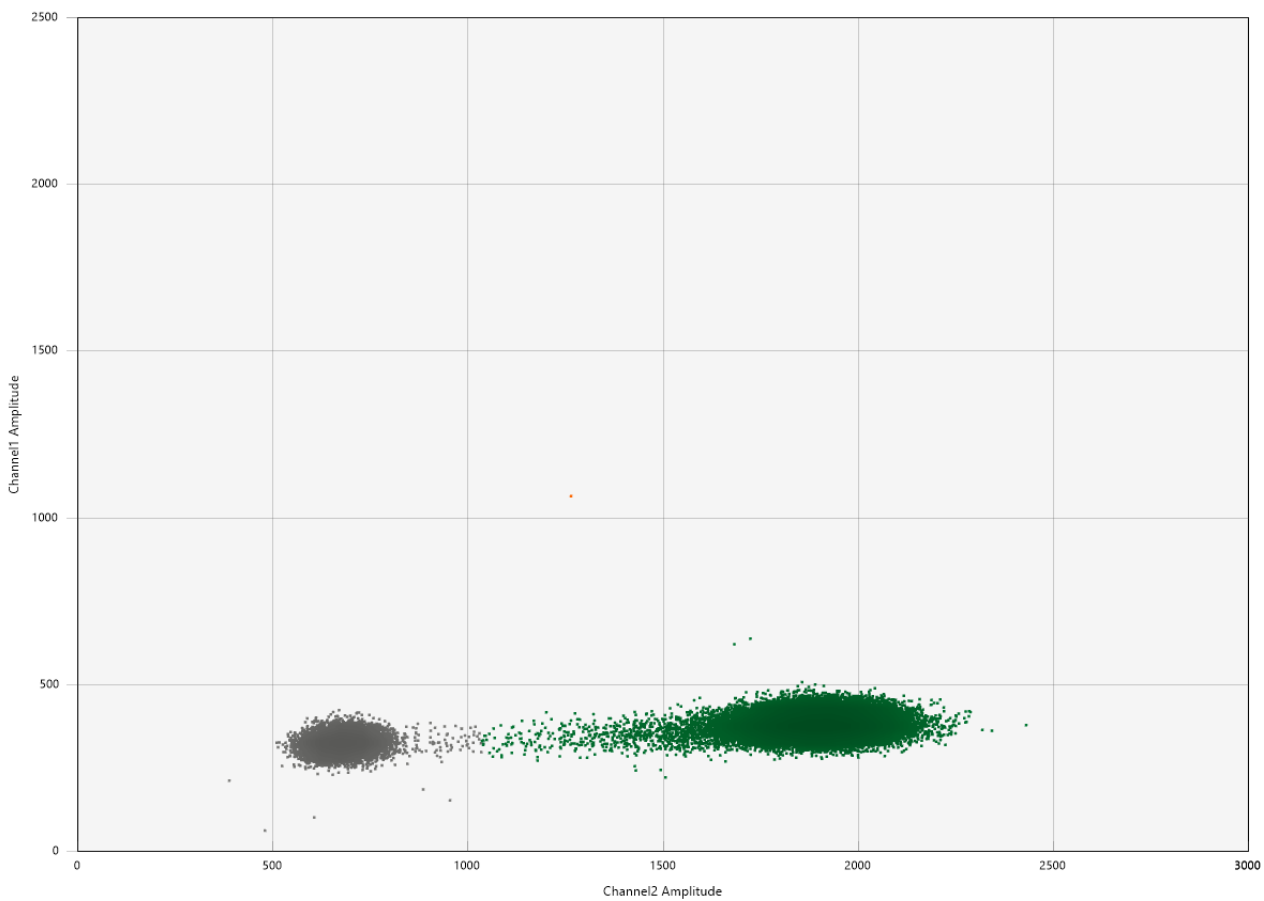

Post-surgery diluted

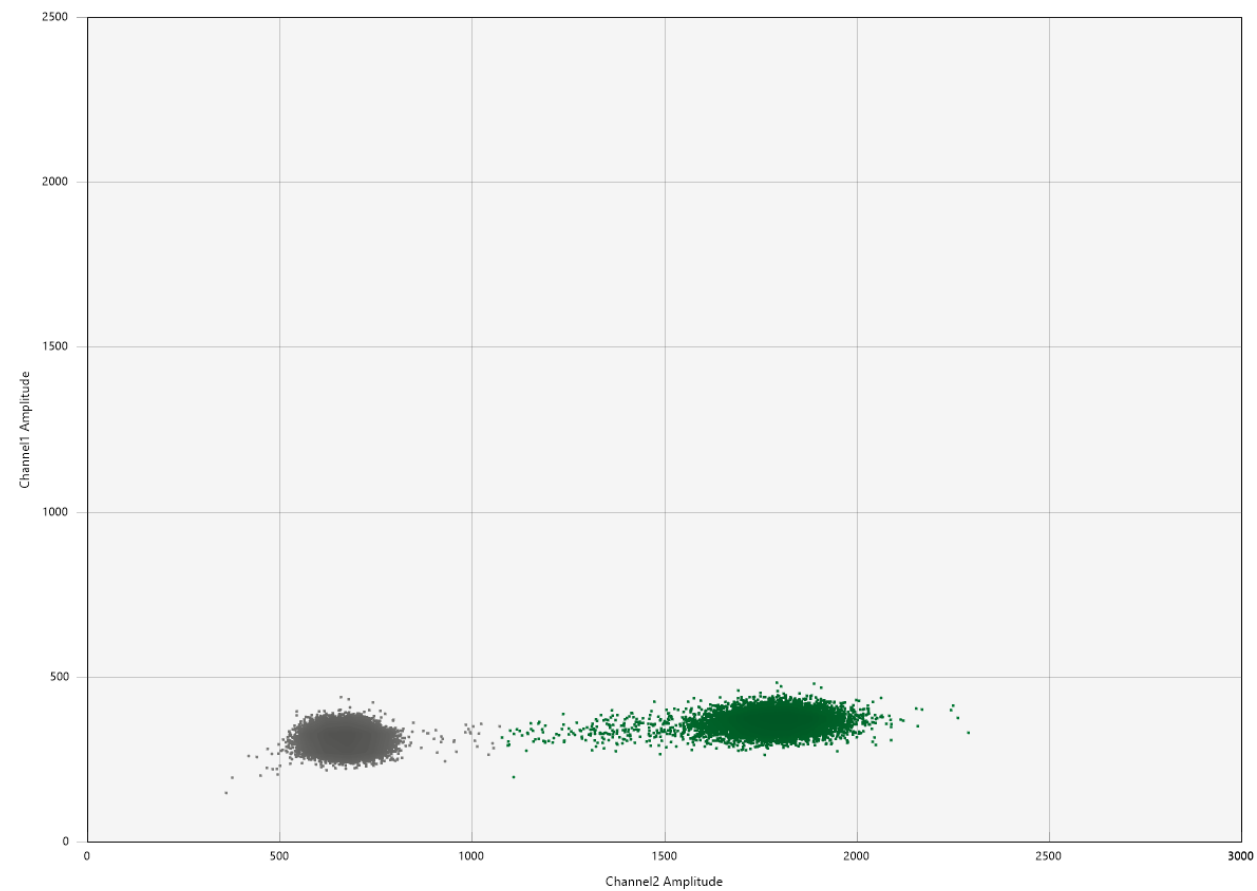

# Concentration plots

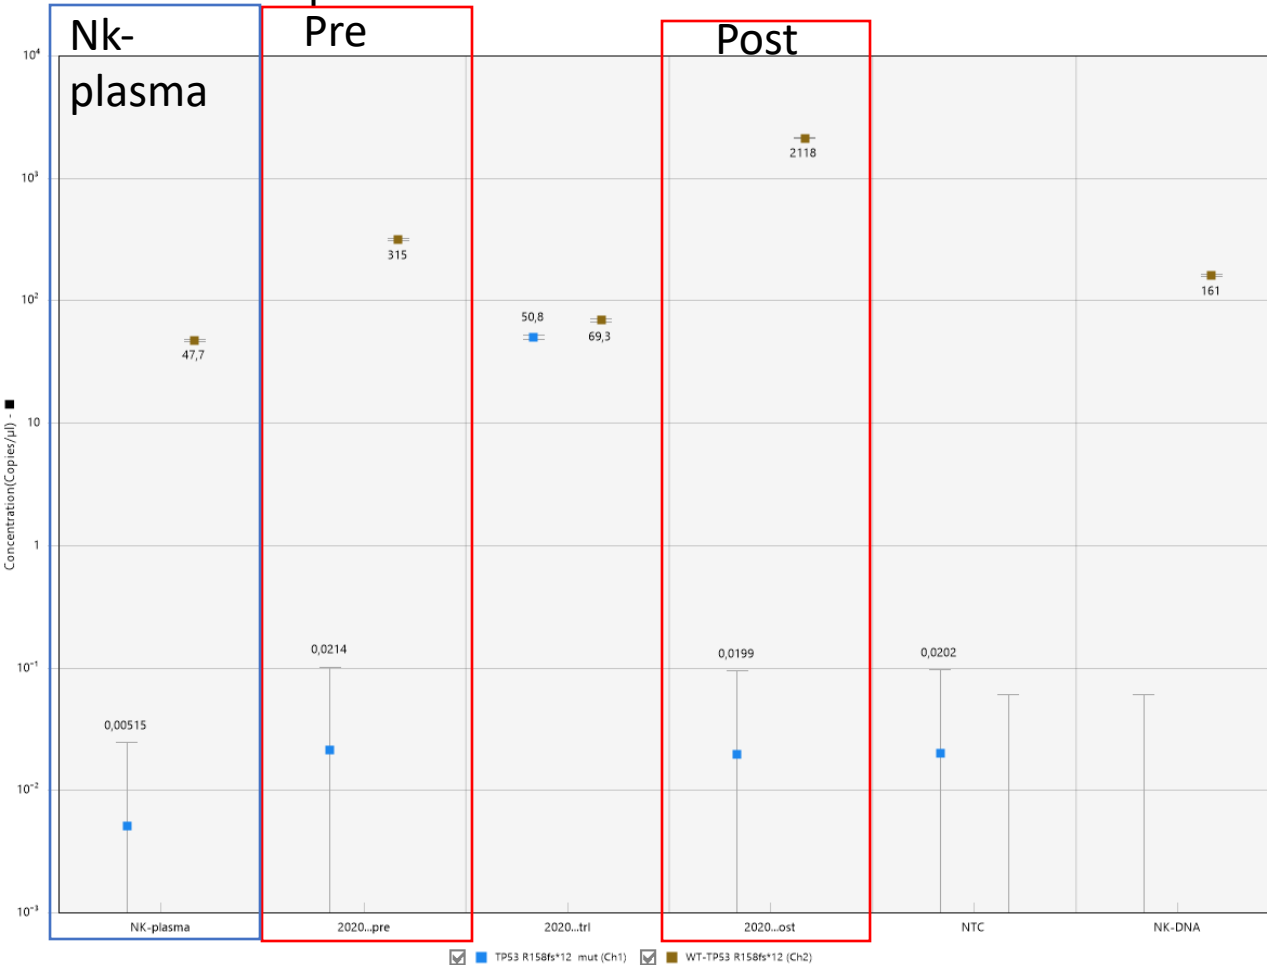

Pre, post

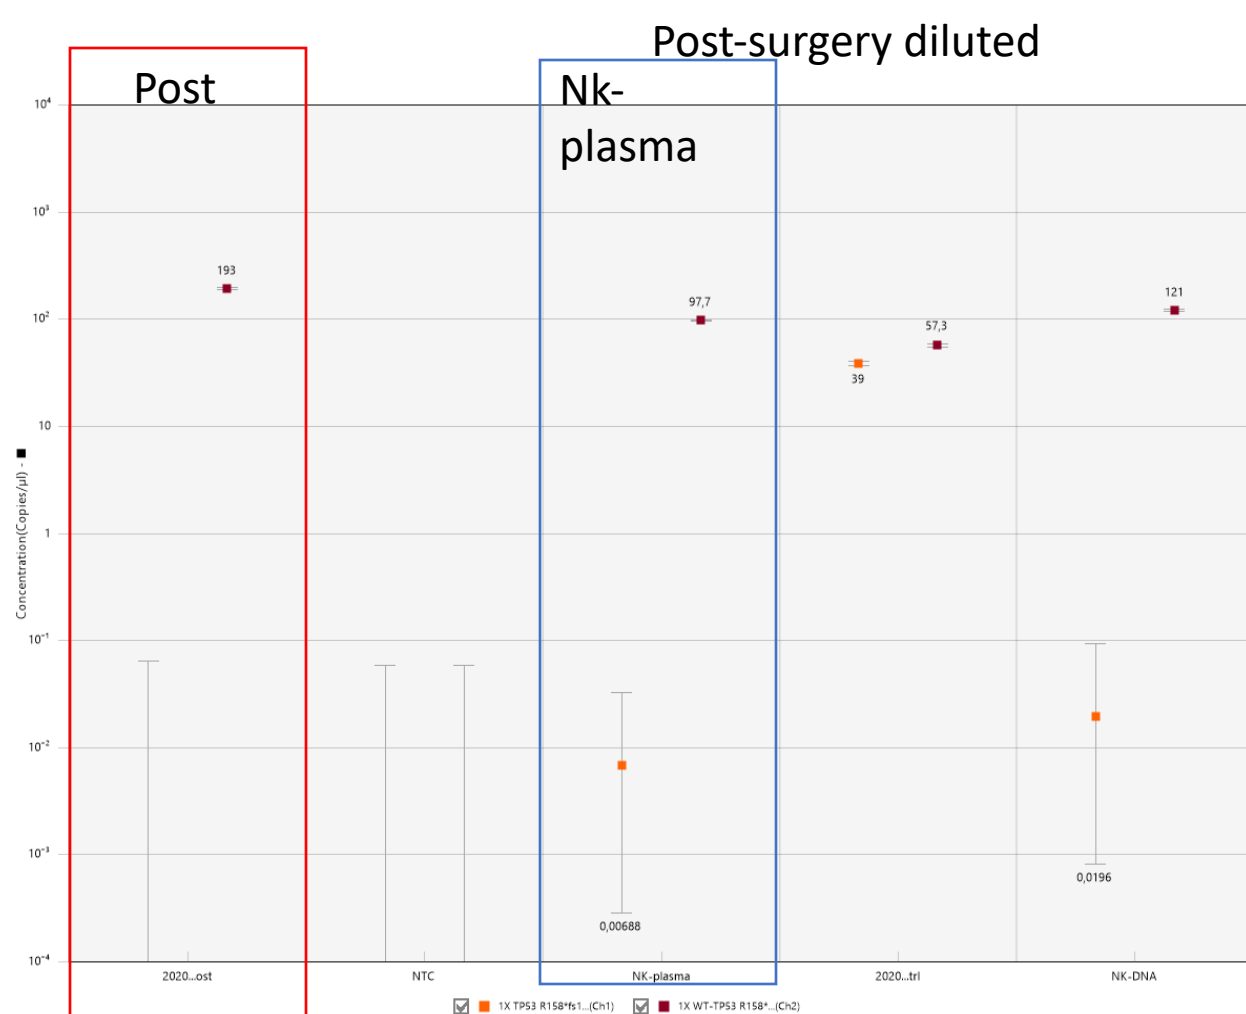

Calling – Pre-op- negative for –TP53 R158fs\*- did not met droplet criteria and overlap  
Post-op and diluted- negative for TP53 R158fs\*

1X TP53  
p.R248W  
mut

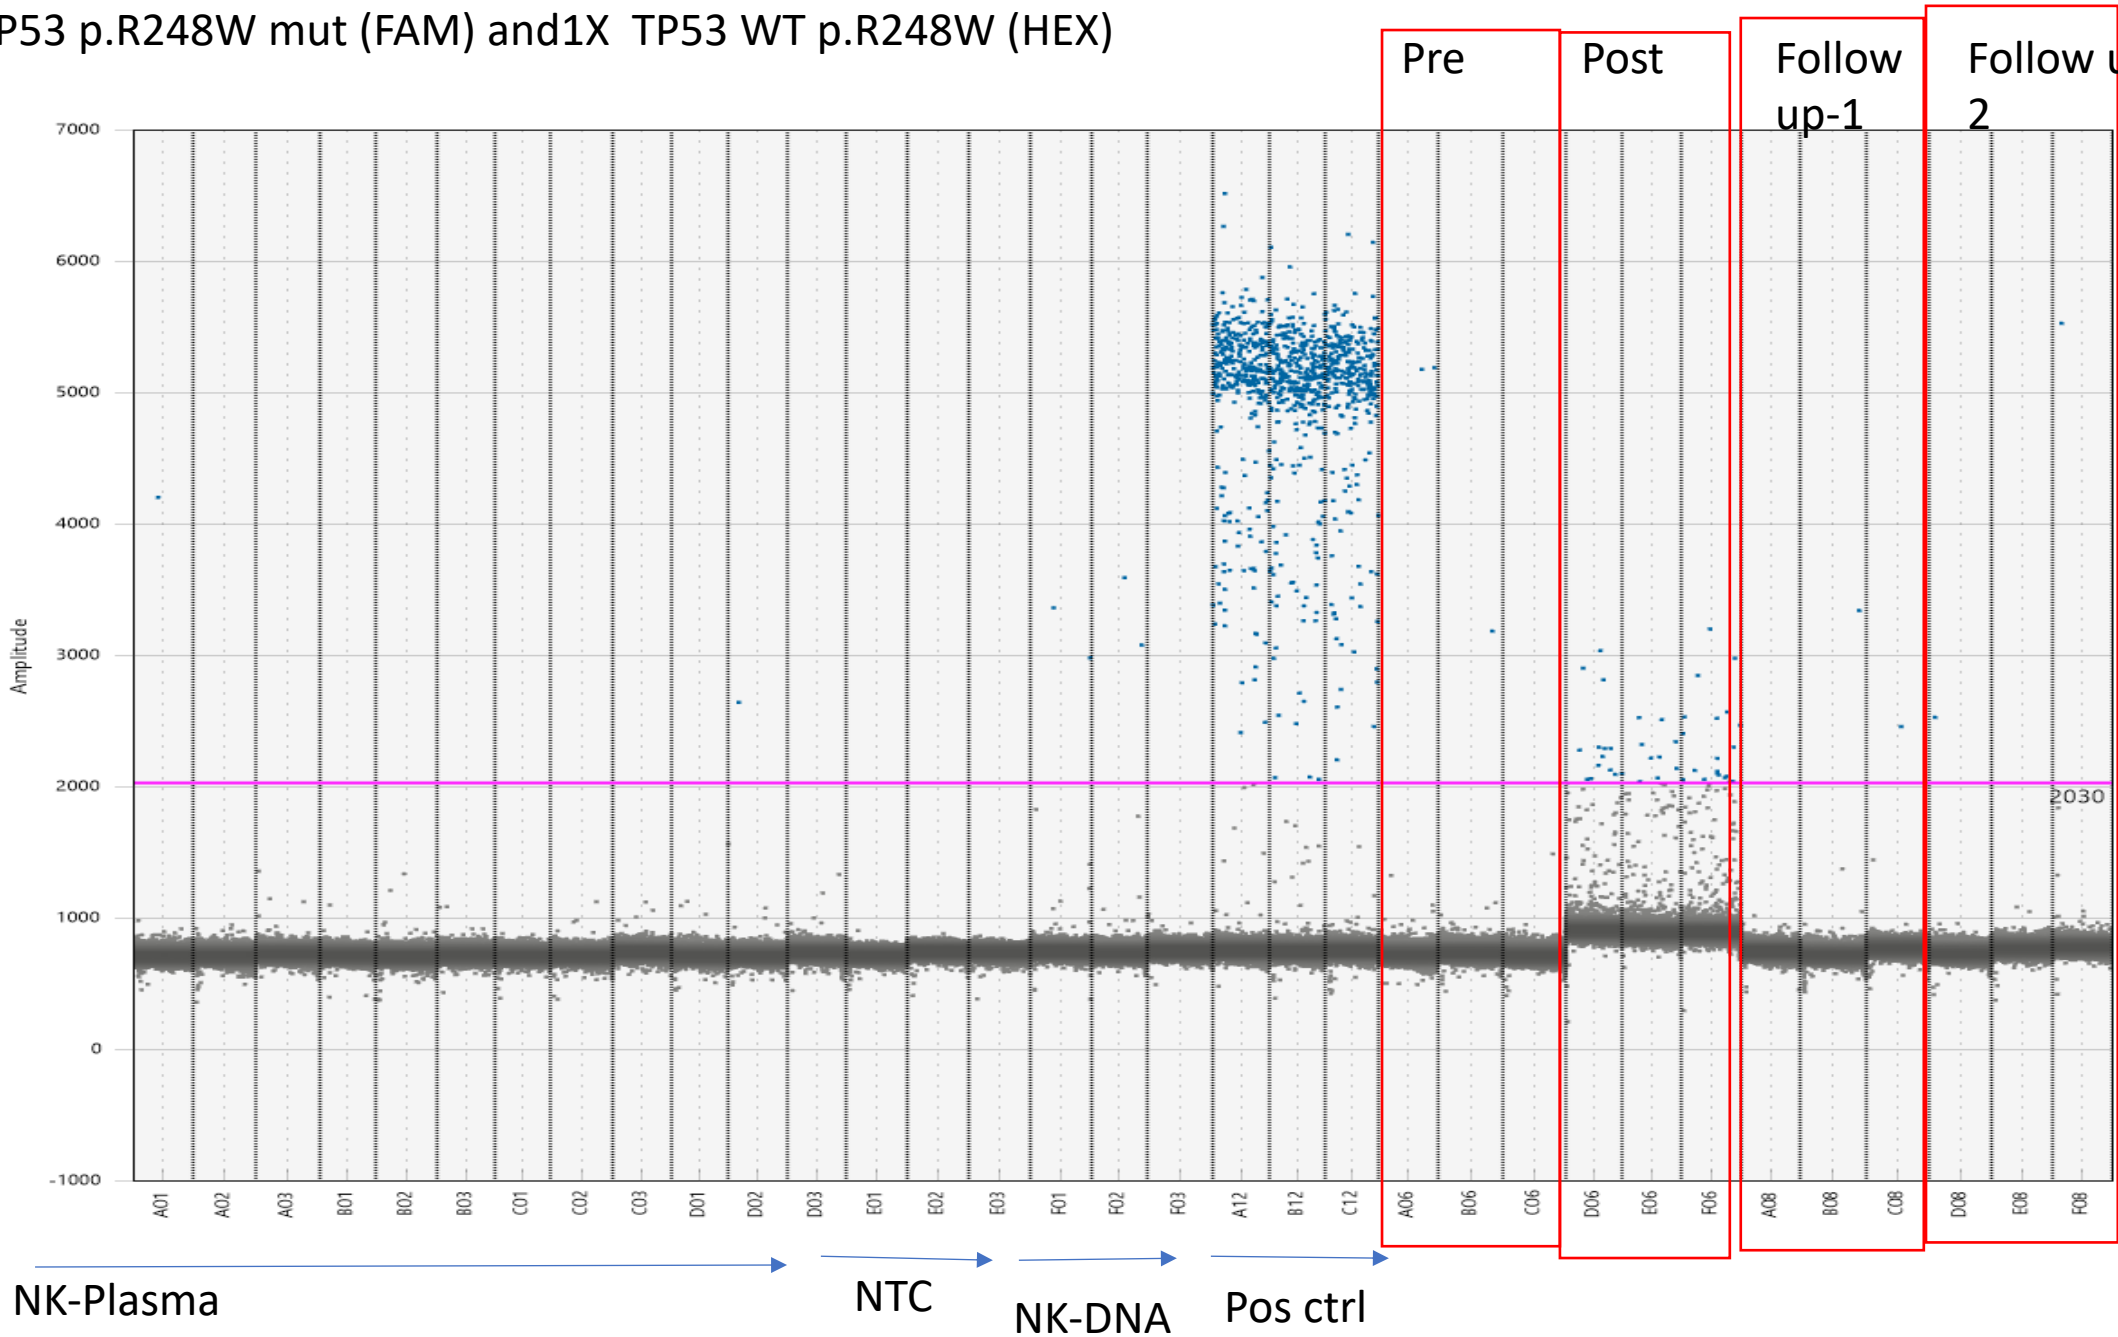

P32 - Final-WT

Assays: 1X TP53 WT p.R248W (HEX)

Gene target : TP53 p.R248W, c.742C>T and TP53,p.?, c.673-2A>G

1X TP53  
p.R248W  
mut

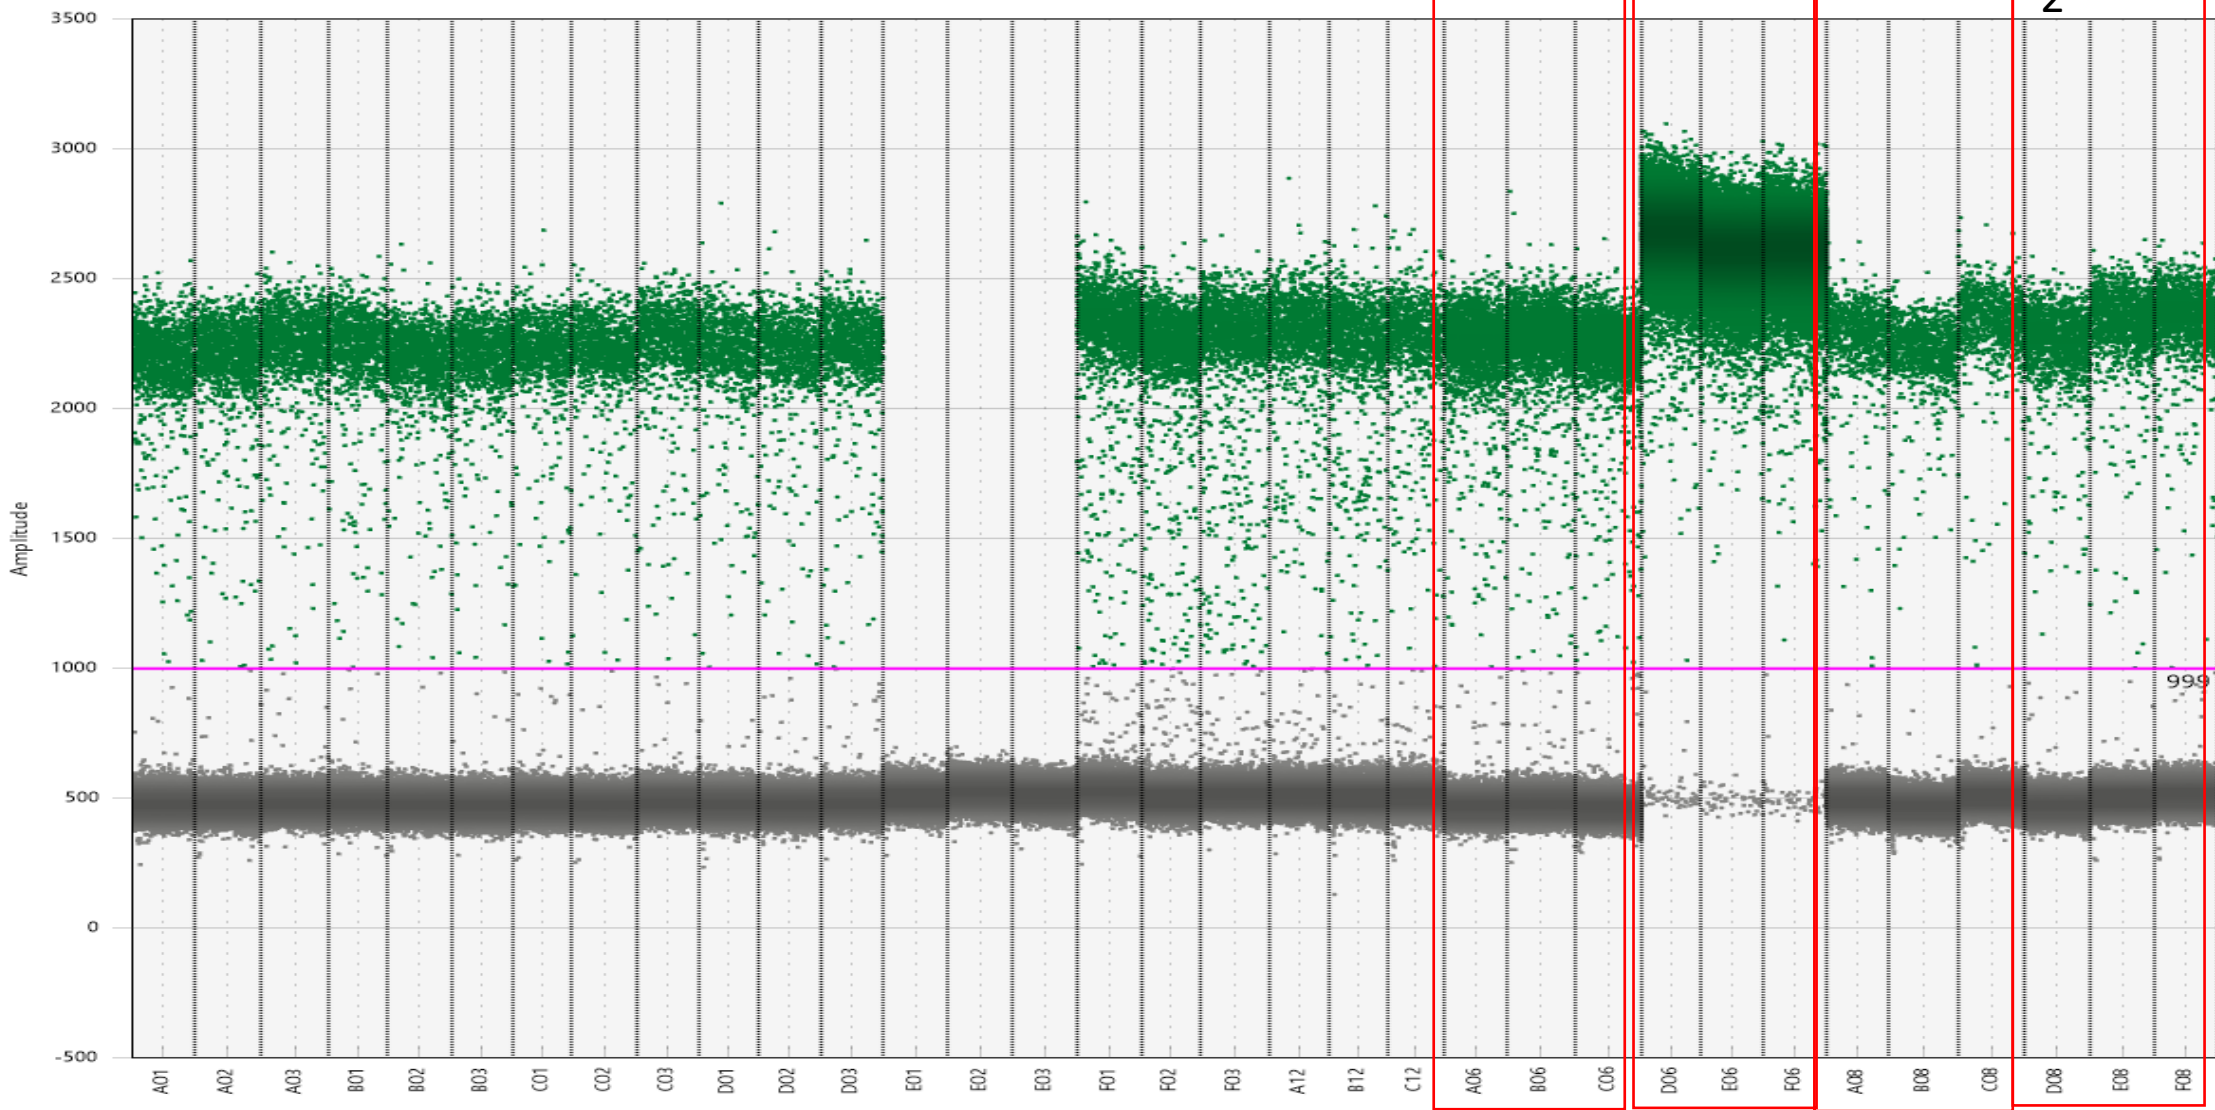

NK-Plasma

NTC

NK-DNA

Pos ctrl

P32 -Final diluted

Gene target : TP53 p.R248W, c.742C>T and TP53,p.?, c.673-2A>G

Assays: 1X TP53 p.R248W mut (FAM) and 1X TP53 WT p.R248W (HEX)

1X TP53  
p.R248W  
mut

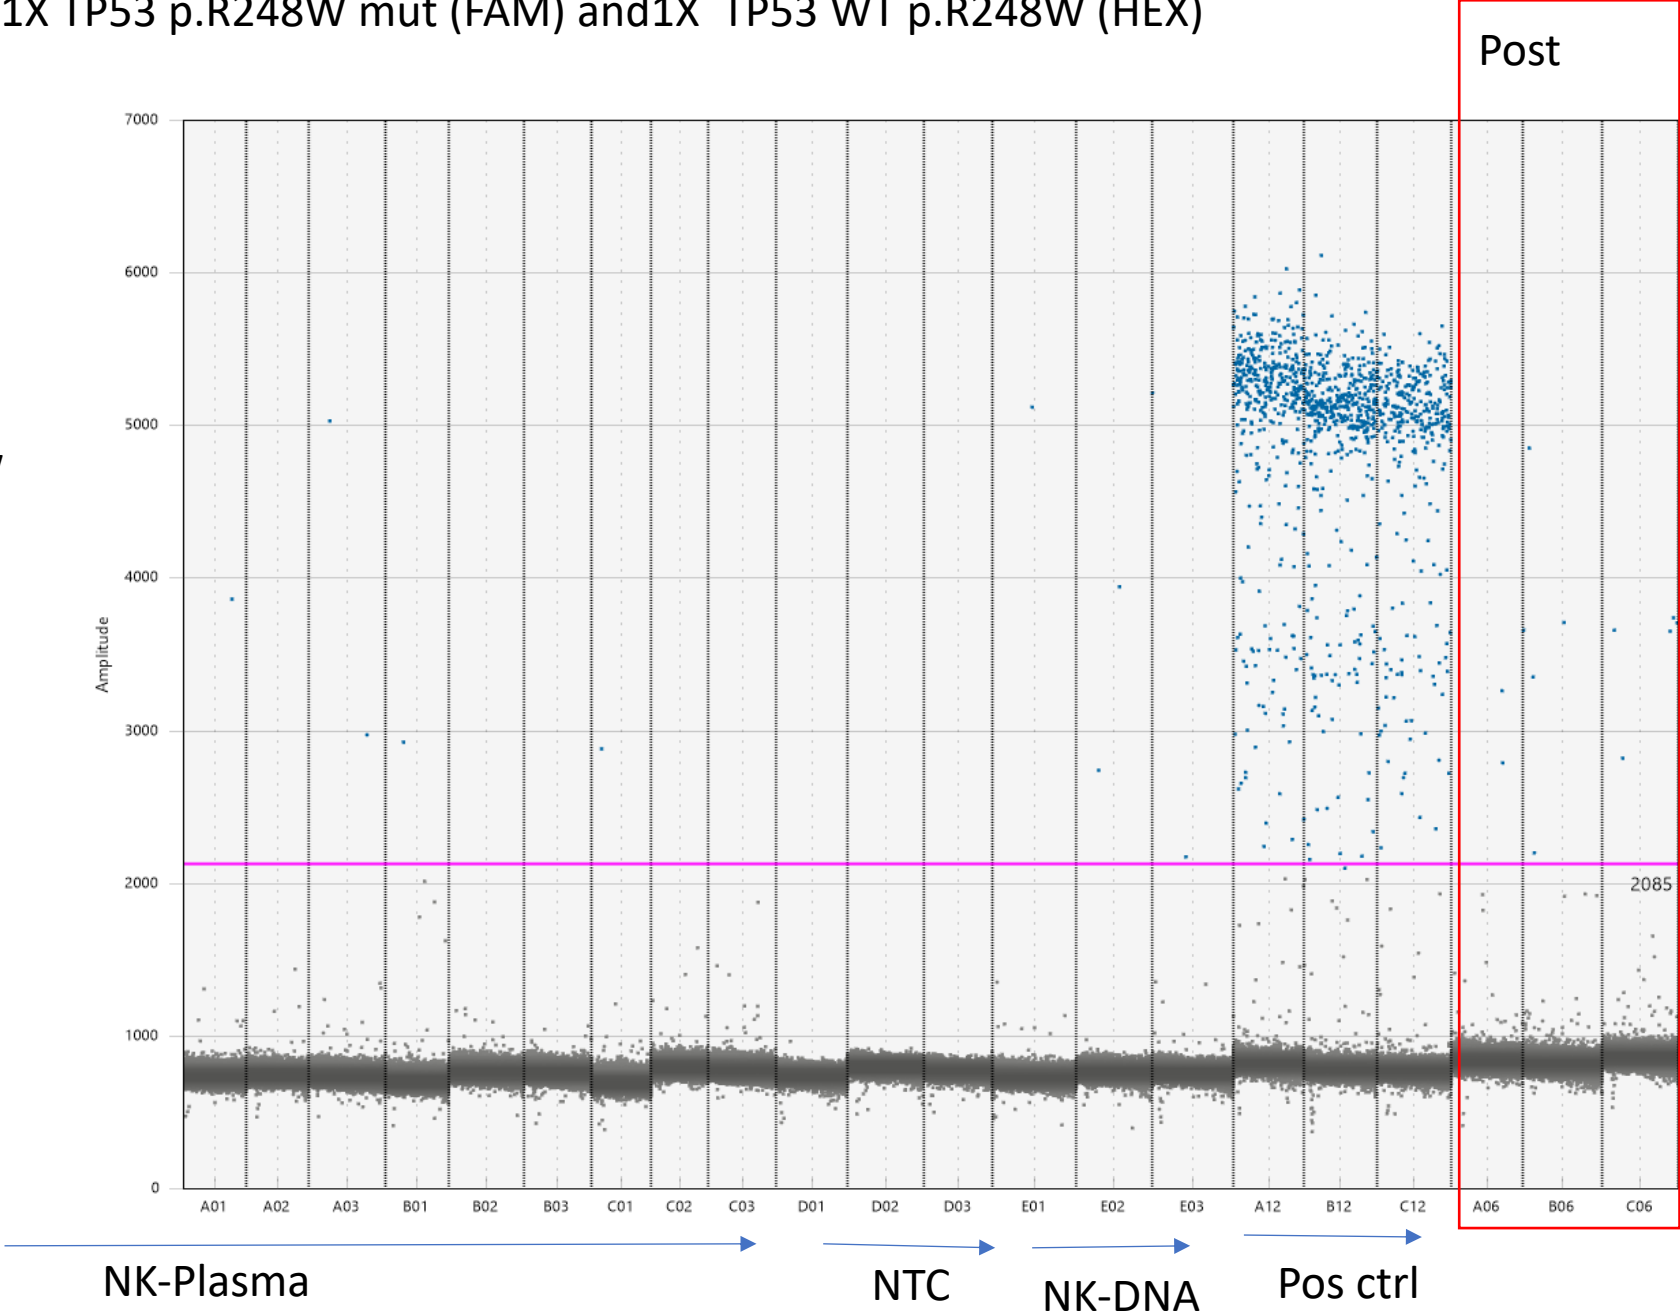

P32 -Final-WT

Assays: 1X TP53 WT p.R248W (HEX)

Gene target : TP53 p.R248W, c.742C>T and TP53,p.?, c.673-2A>G

1X TP53  
WT p.R248  
W

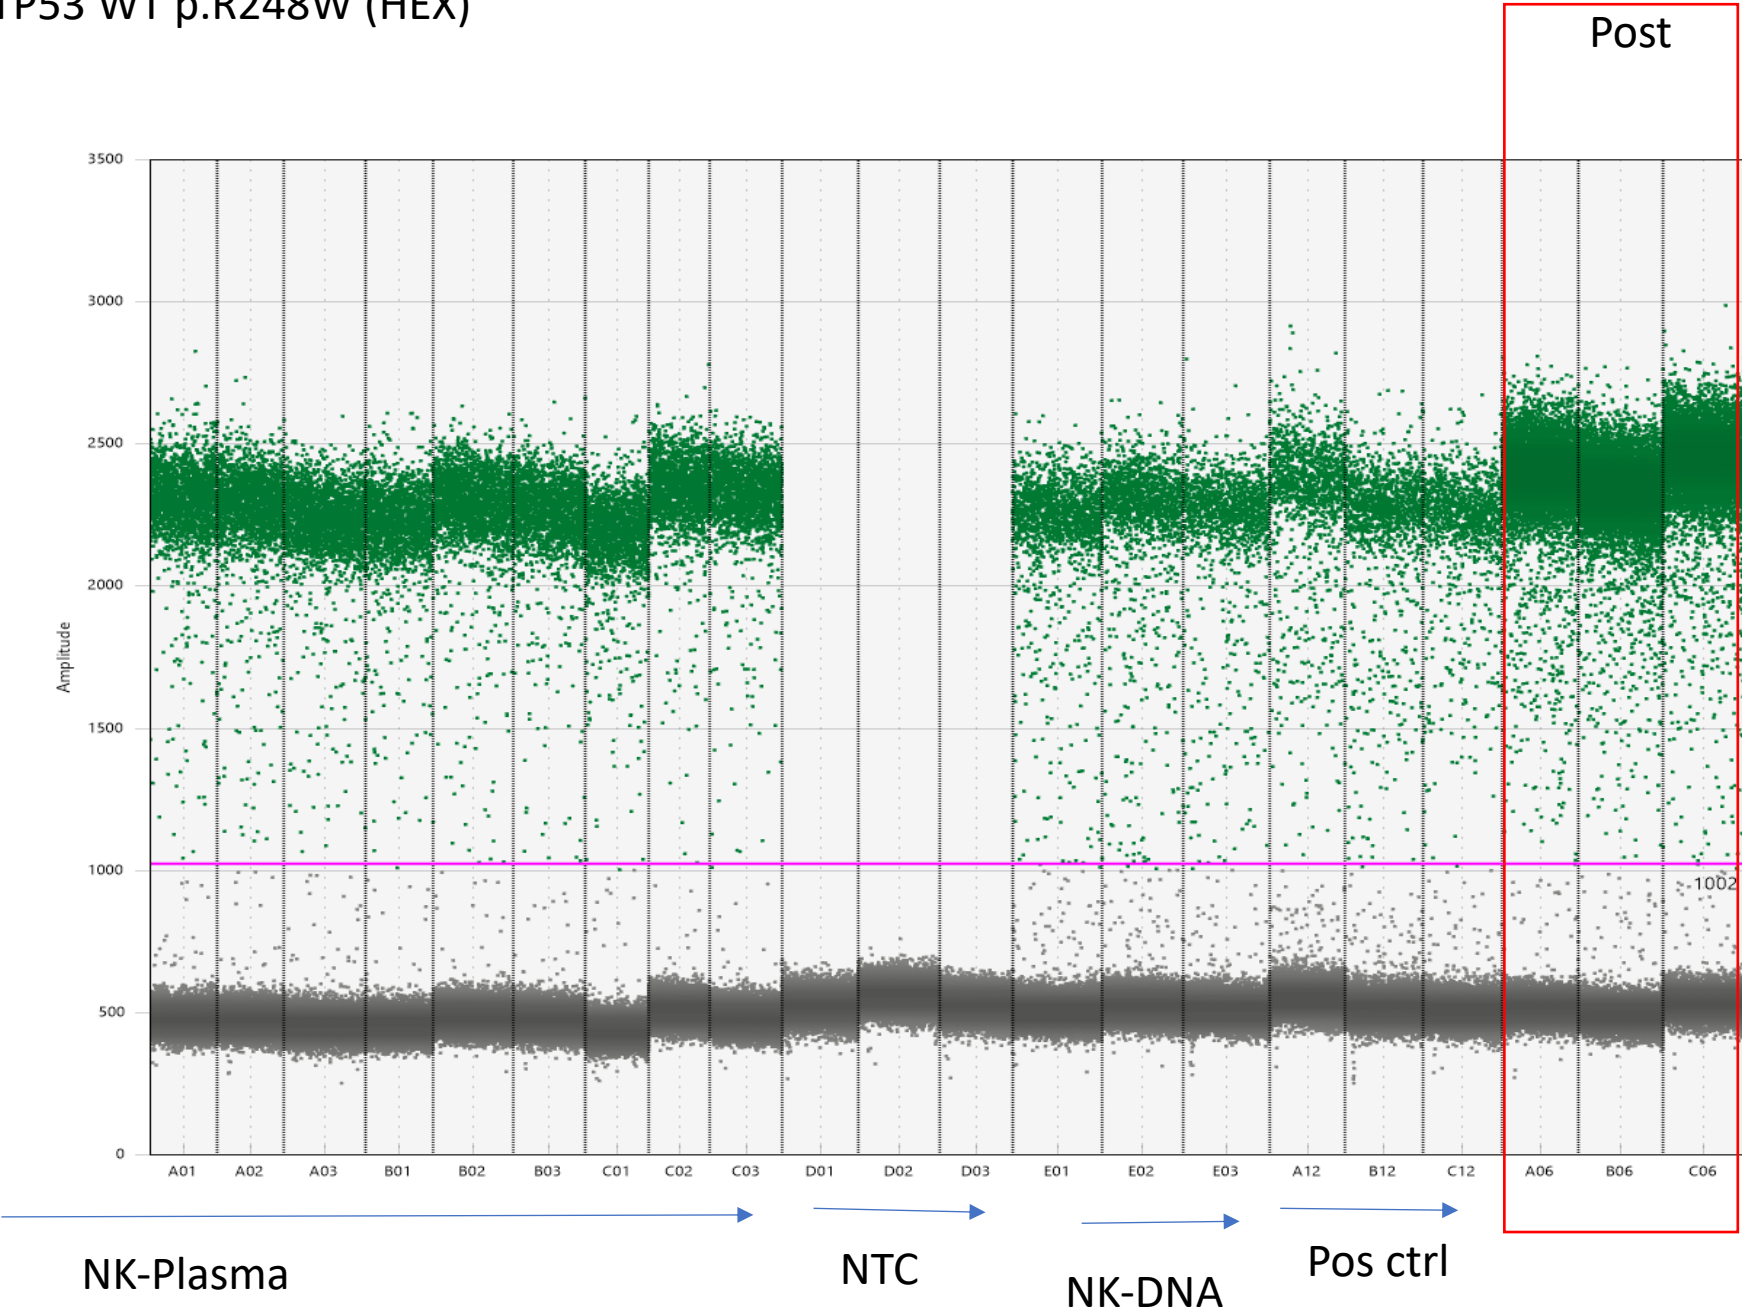

NK-plasma DNA

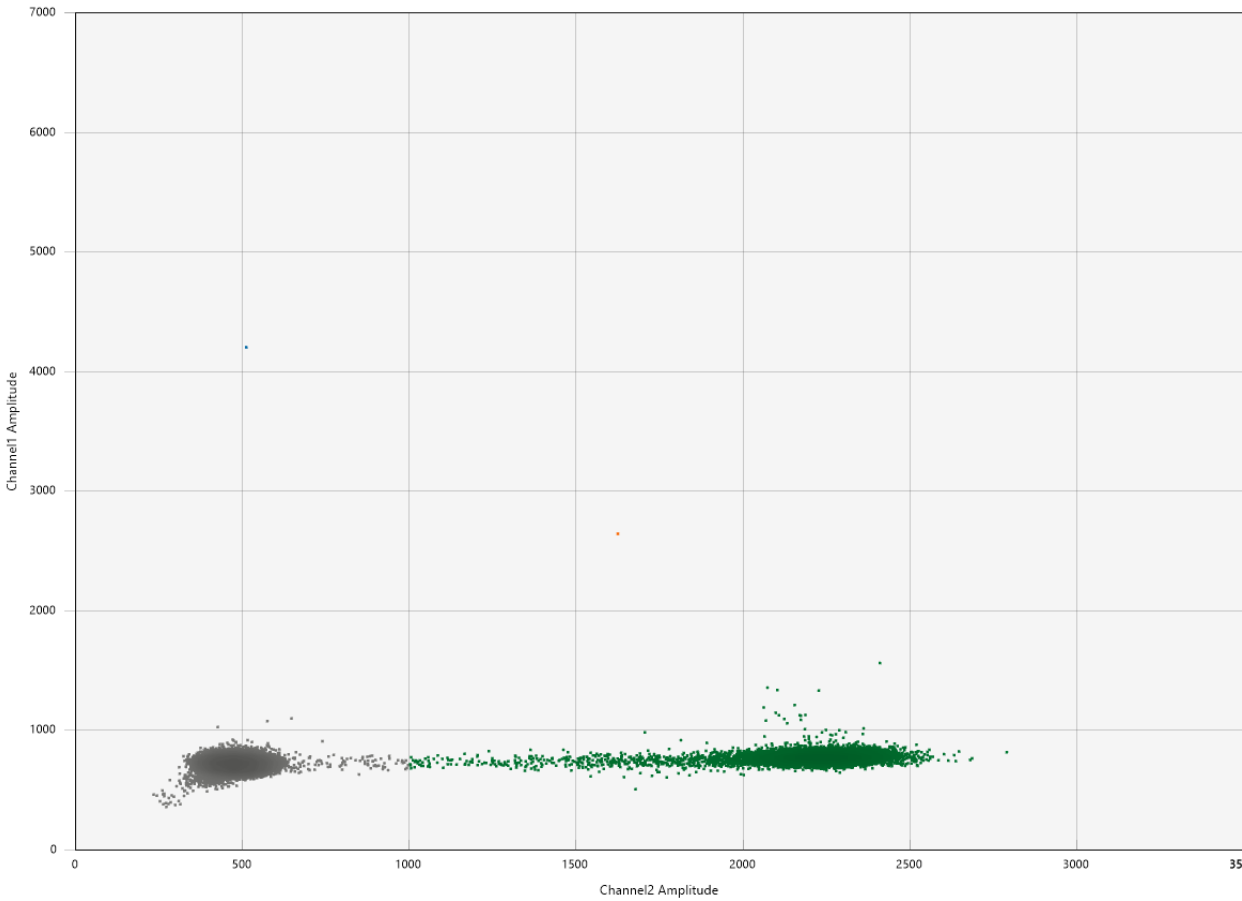

Positive control

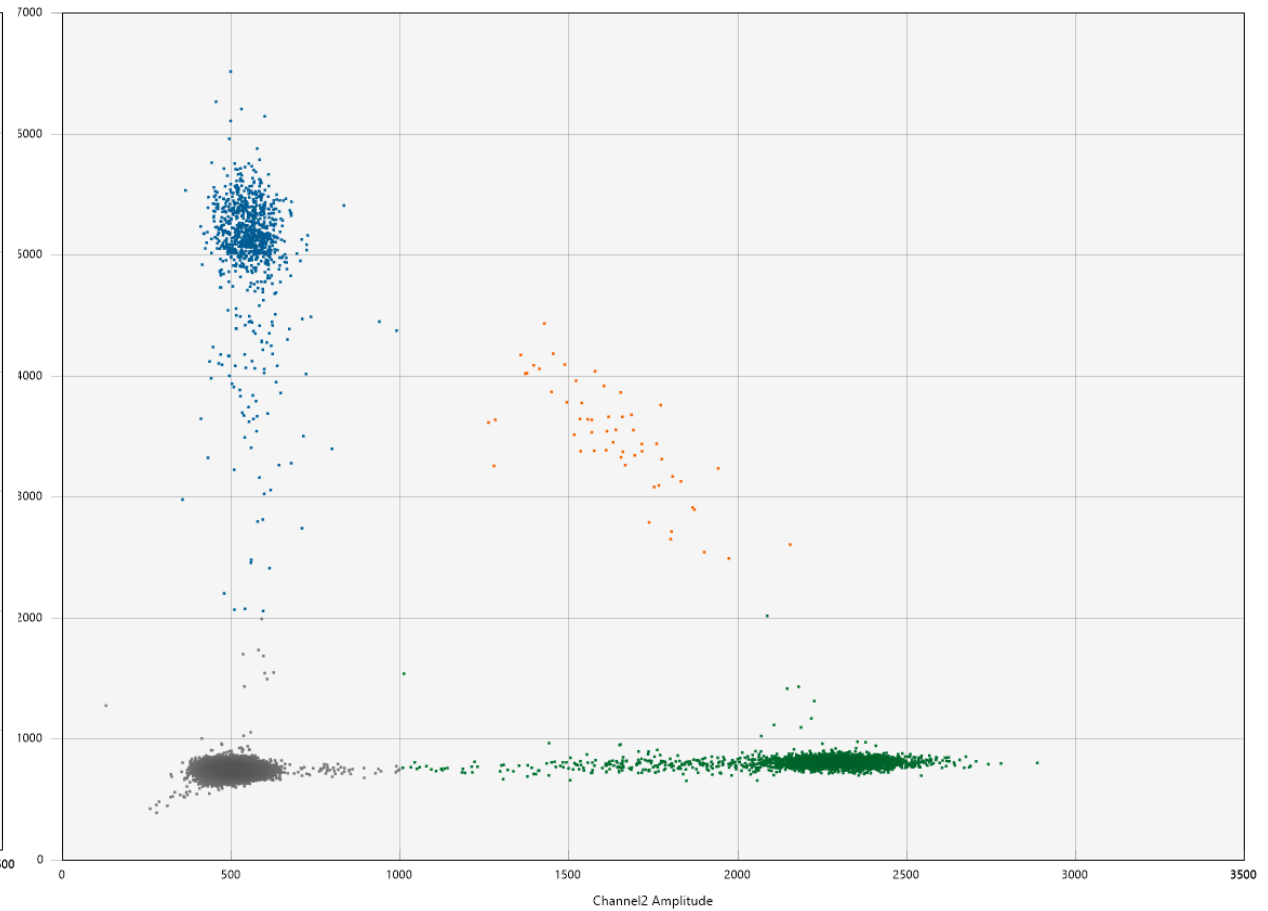

# Pre-surgery

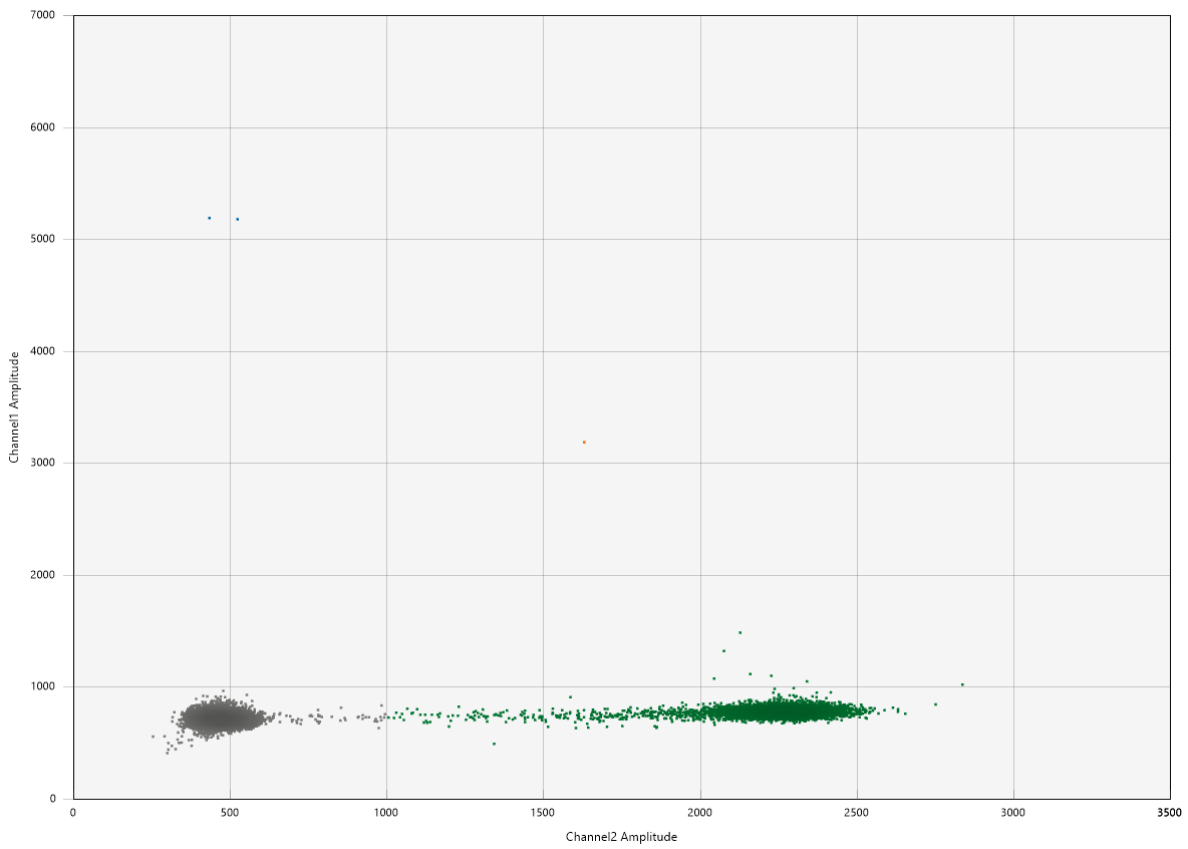

# Post-surgery

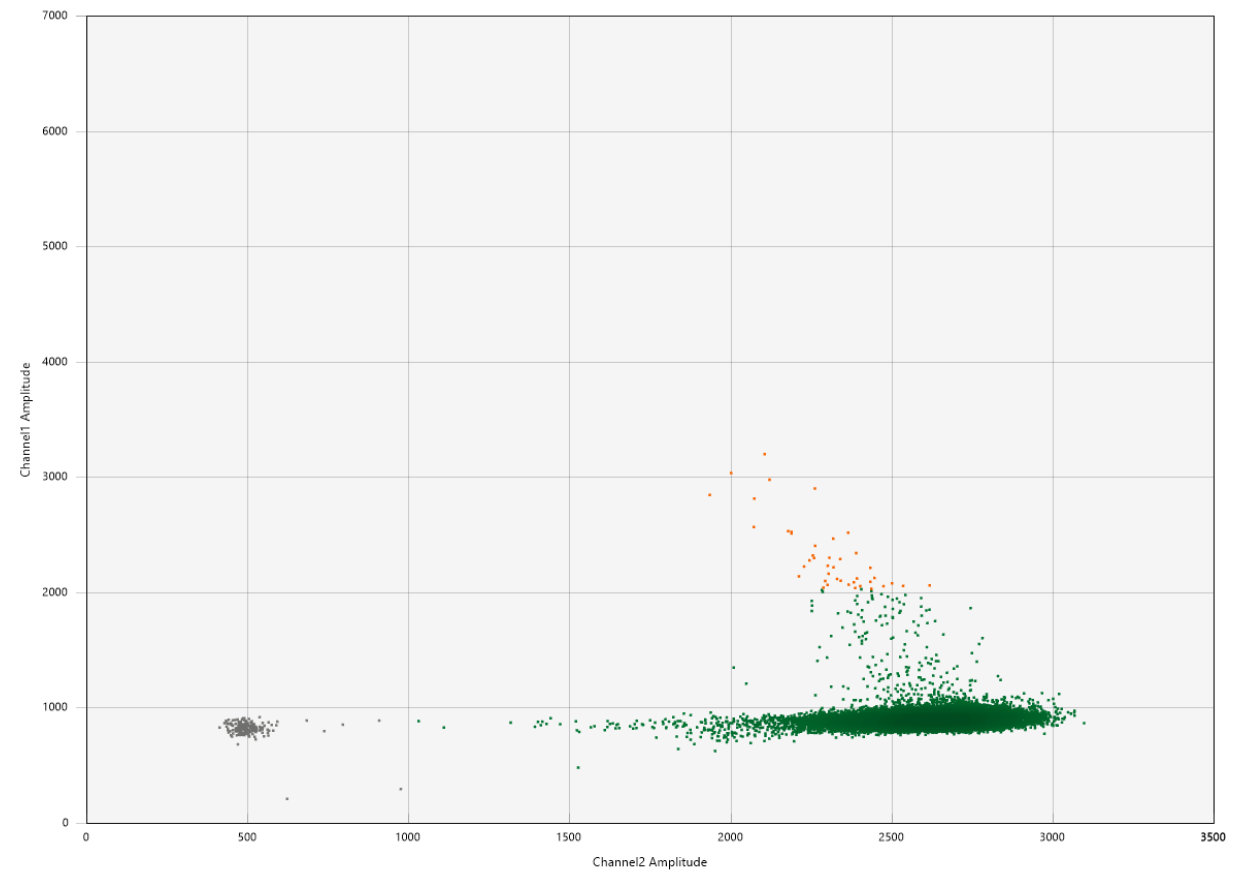

# Post-surgery diluted

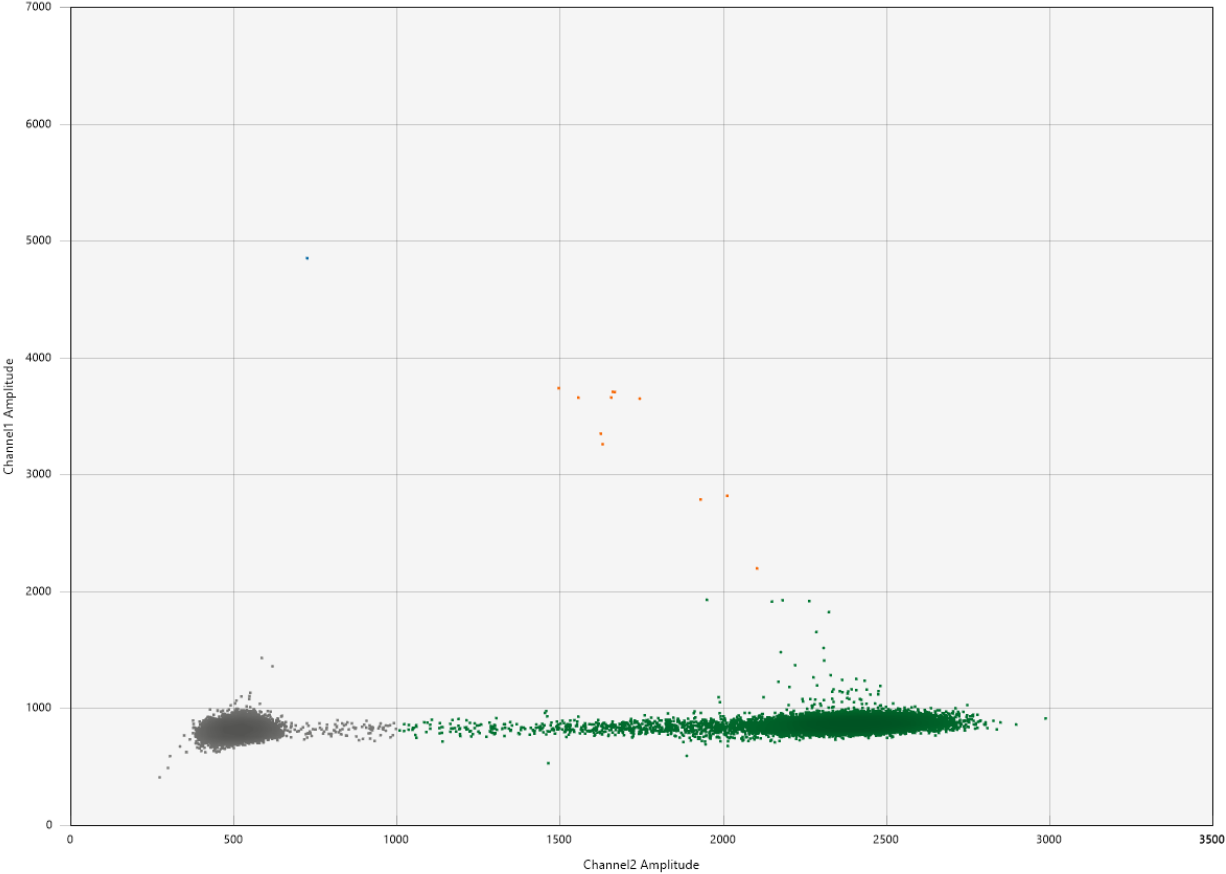

Follow-up 1

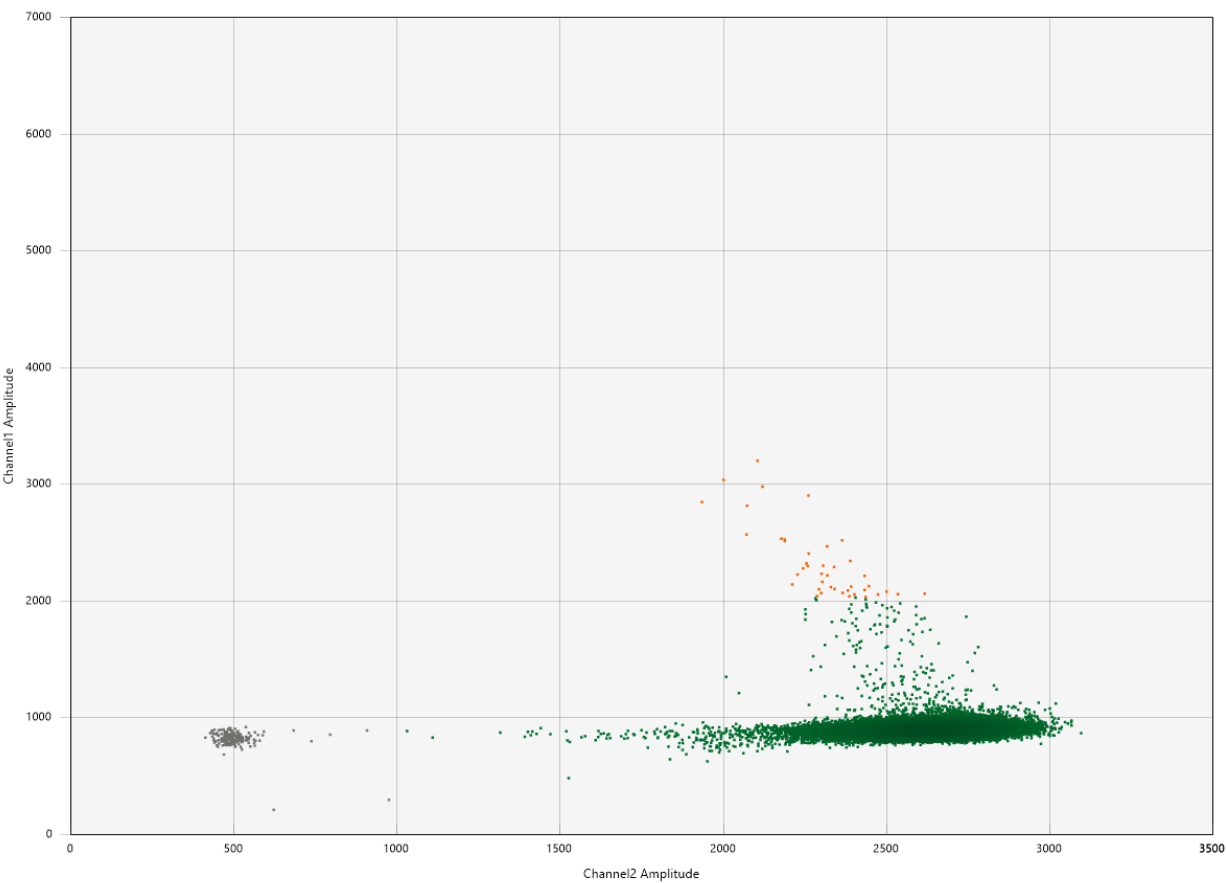

Follow-up 2

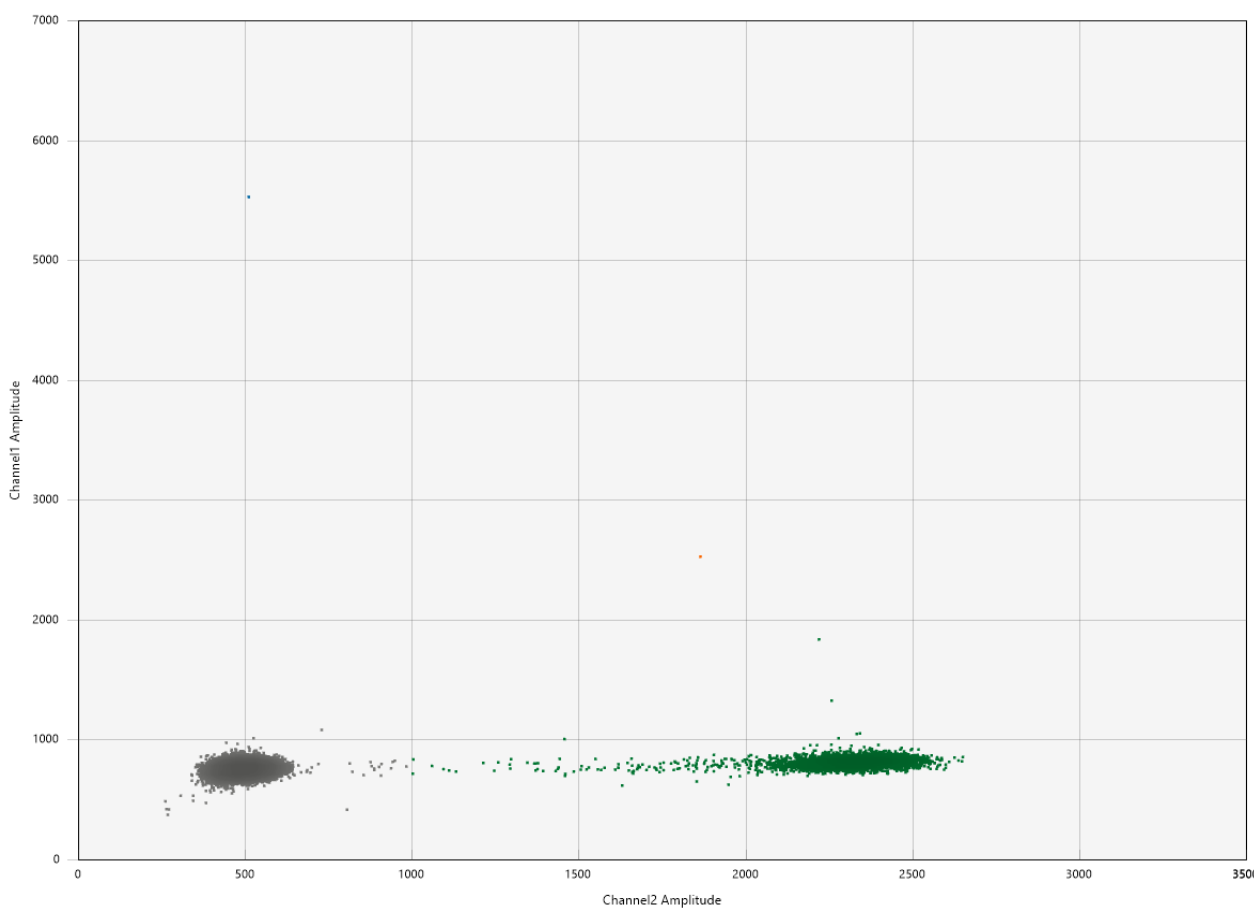

Concentration plots

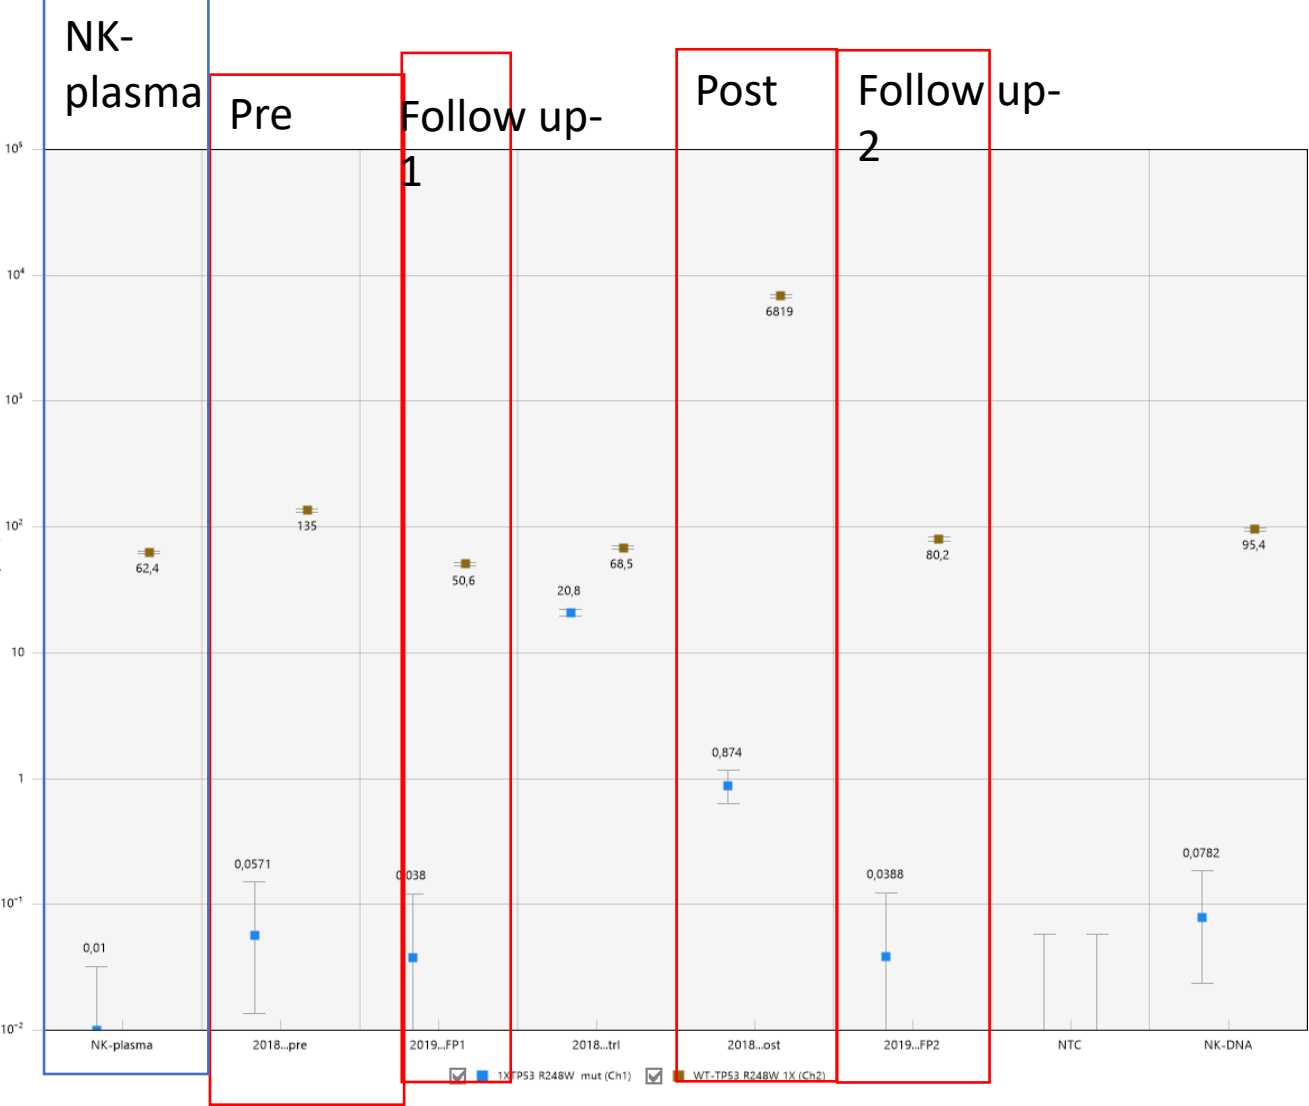

Diluted

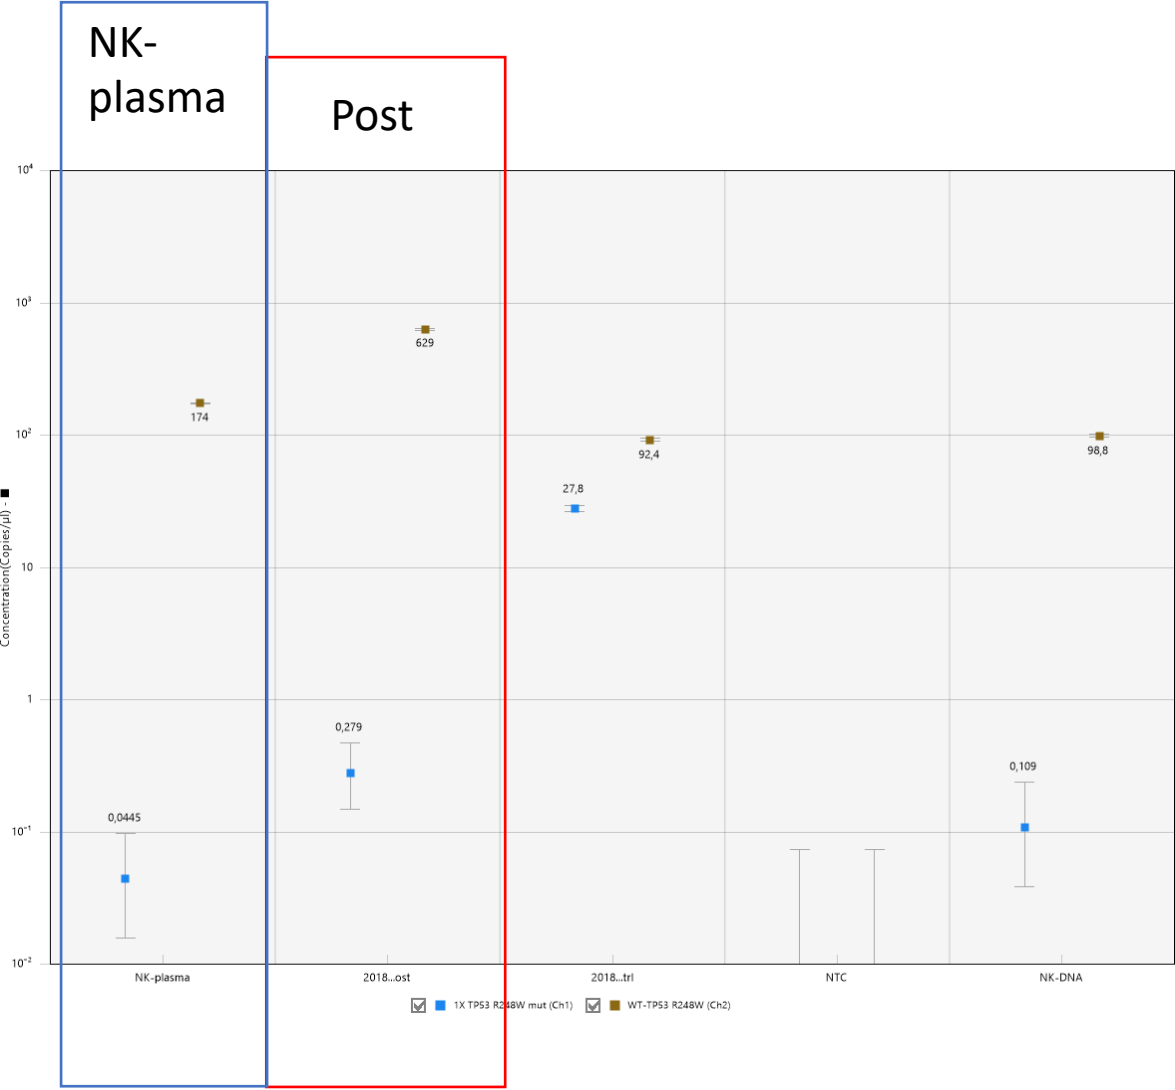

Assays: 0.7X TP53,p.R273H mut (FAM) and 1X dark probe for TP53,p.R273H  
0.3X KRAS p.G13D mut (FAM) and 1X KRAS WT p.G13D (HEX)

0.7X TP53,  
p.R273H  
mut

0.3X KRAS  
p.G13D mut

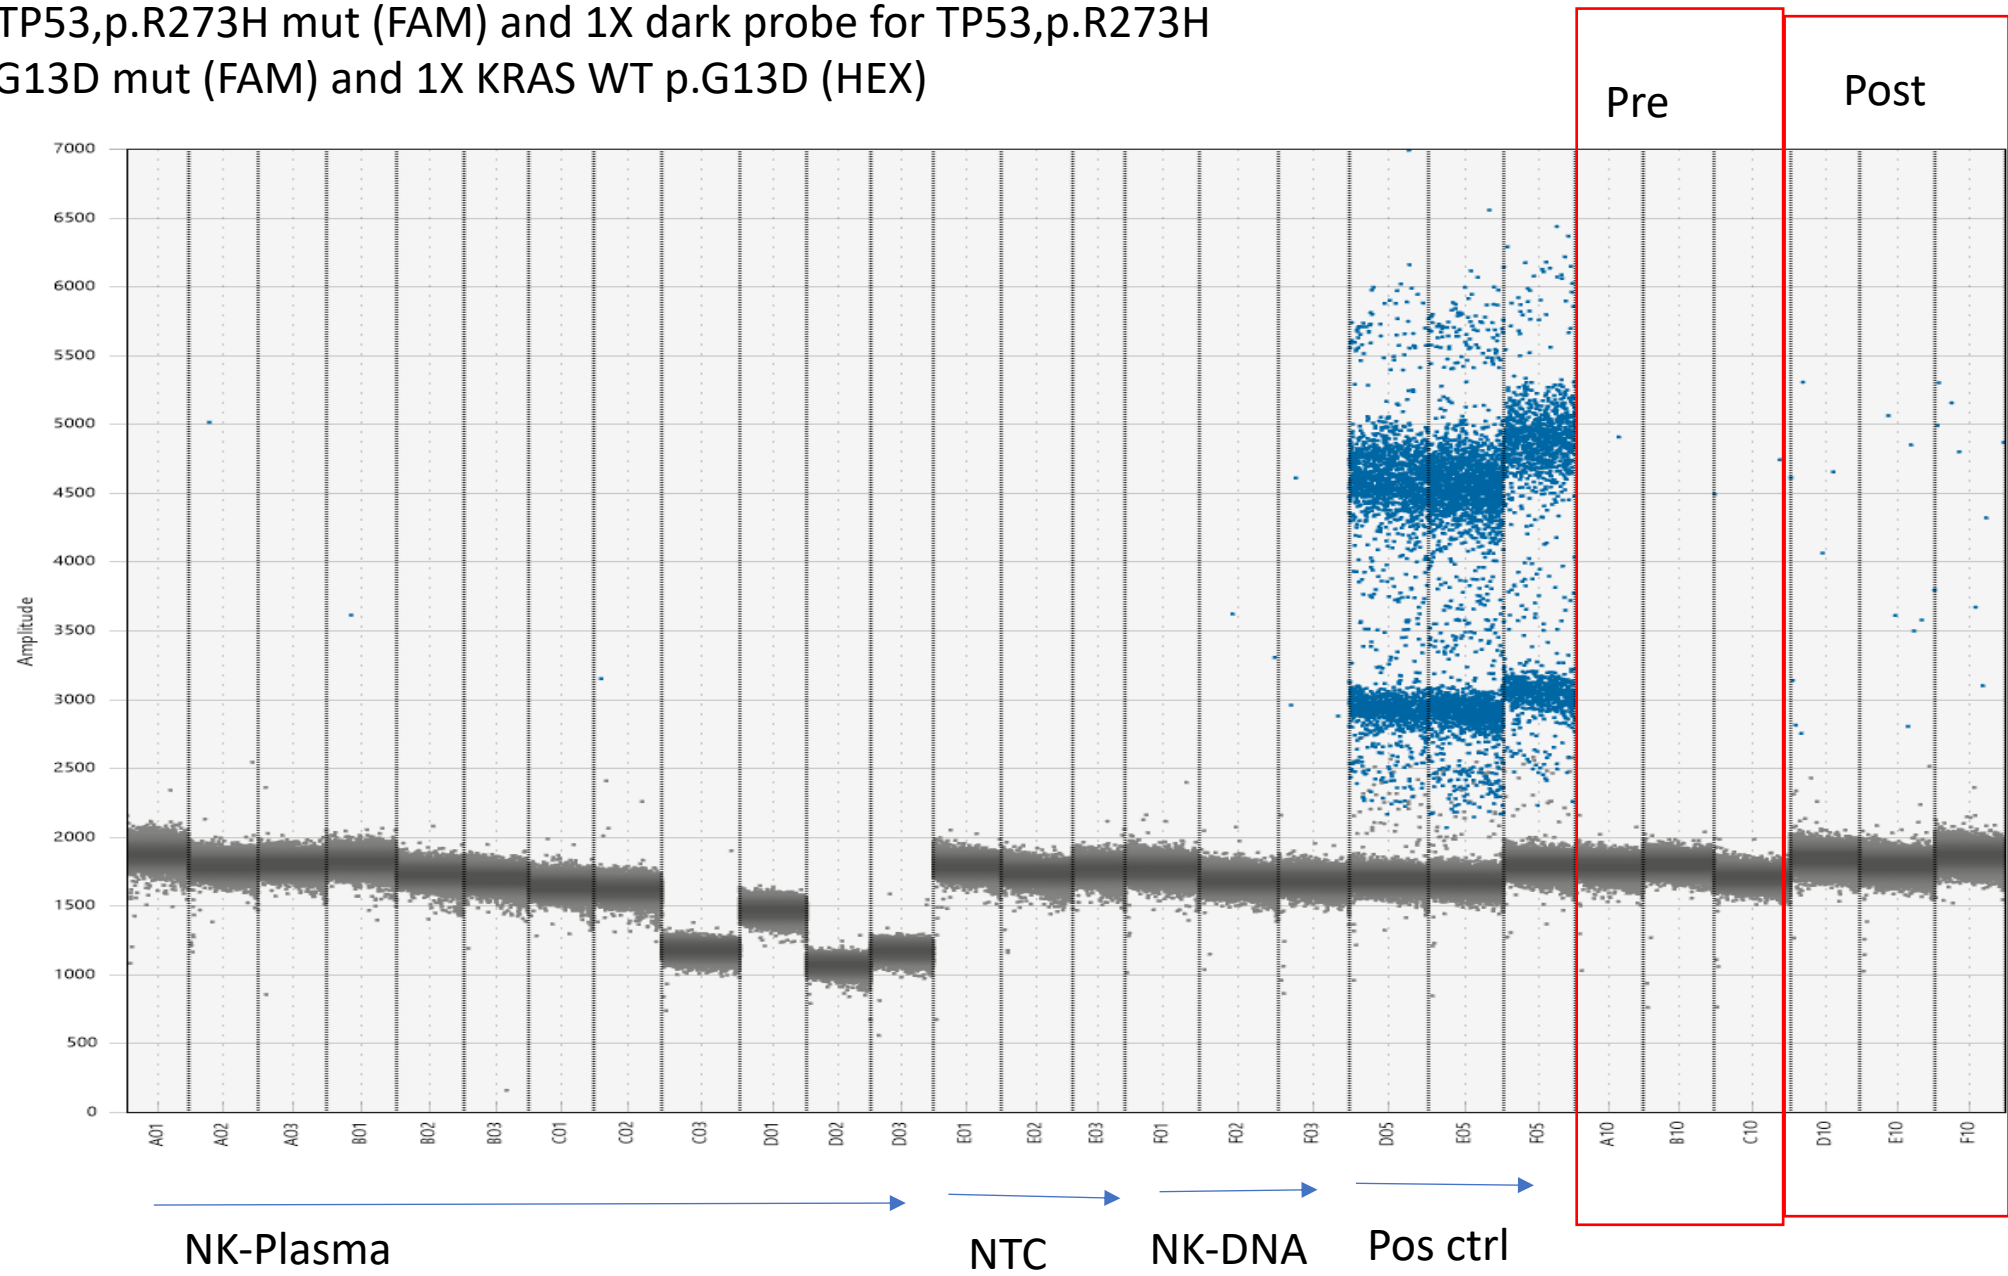

P44 -Final -WT

Assays: 1X dark probe for TP53,p.R273H and 1X KRAS WT p.G13D (HEX)

0.3X KRAS  
WT p.G13D

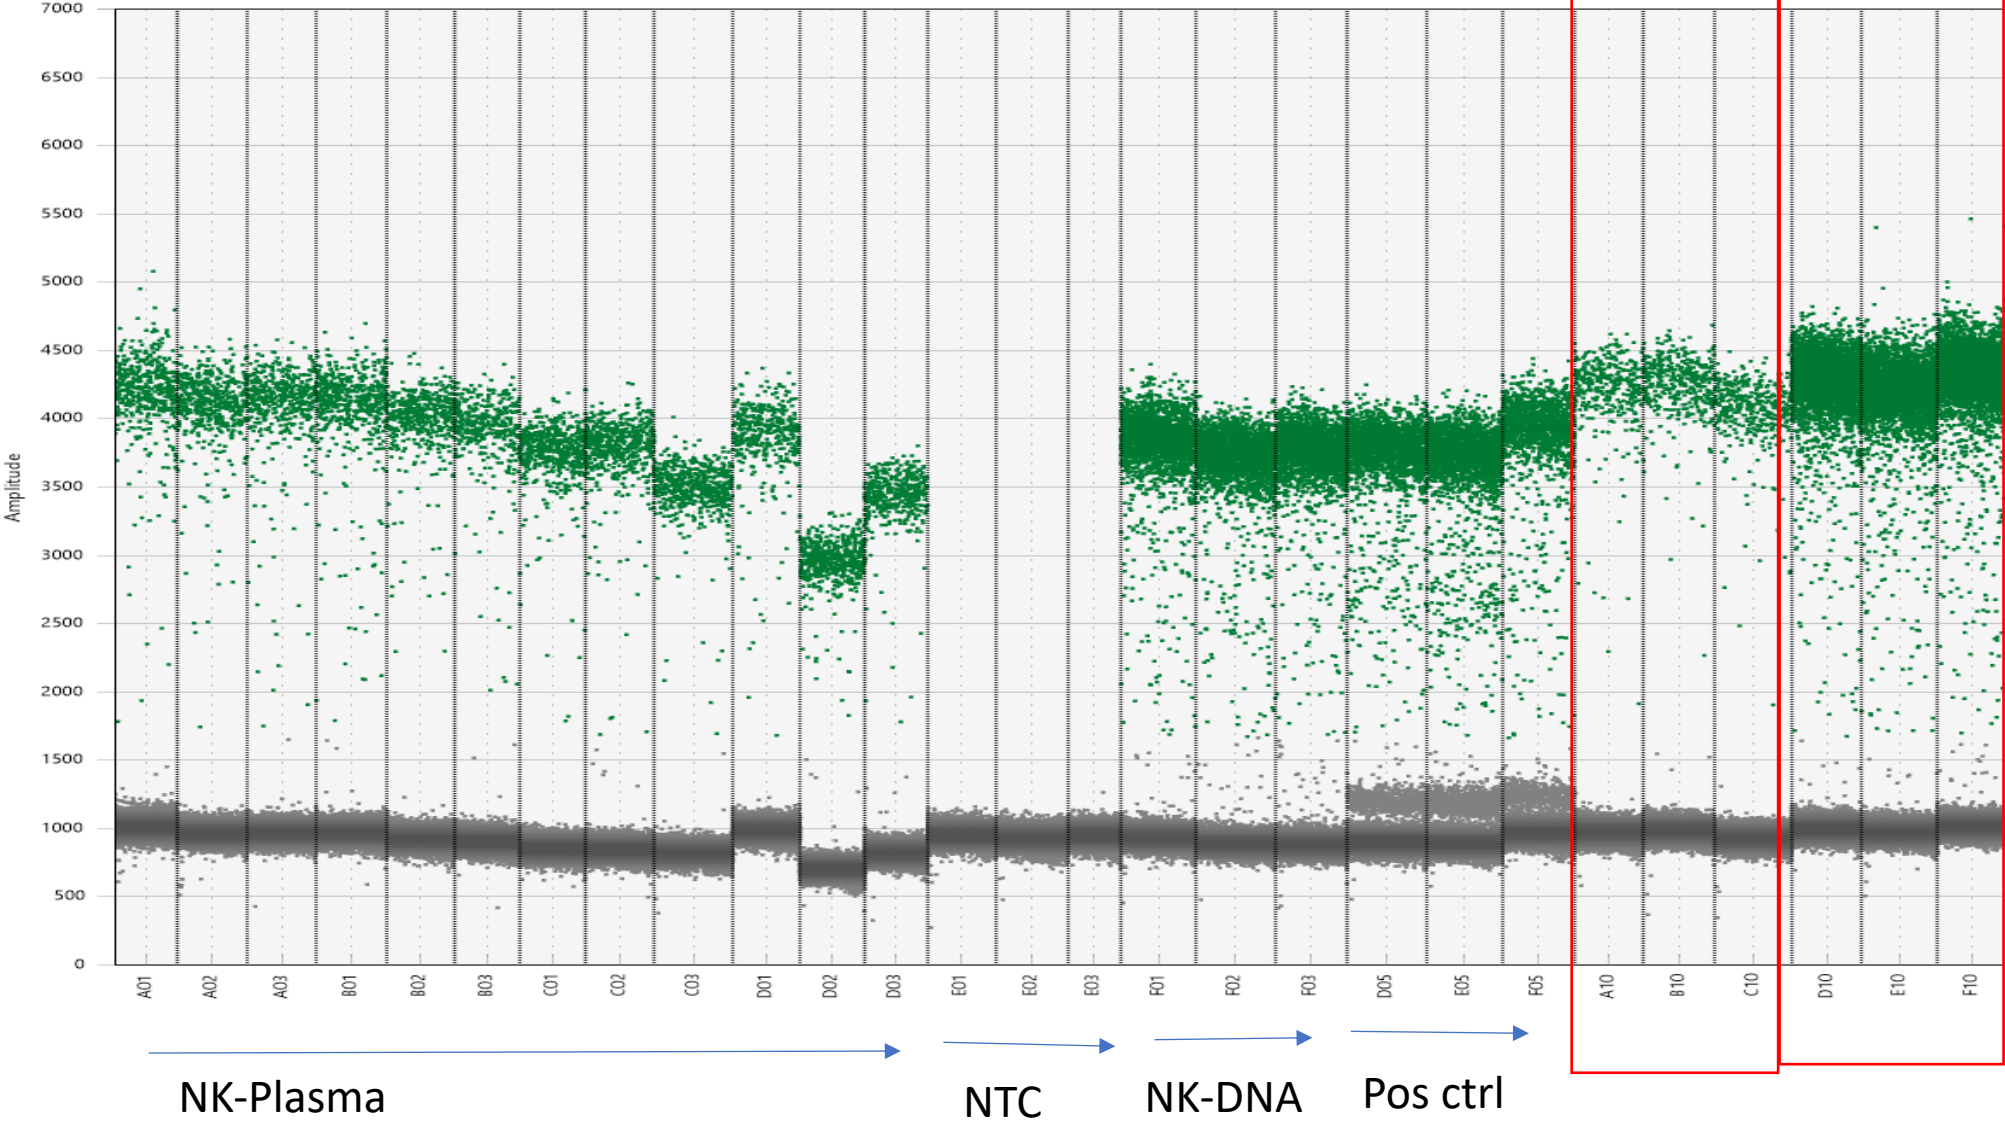

Positive control

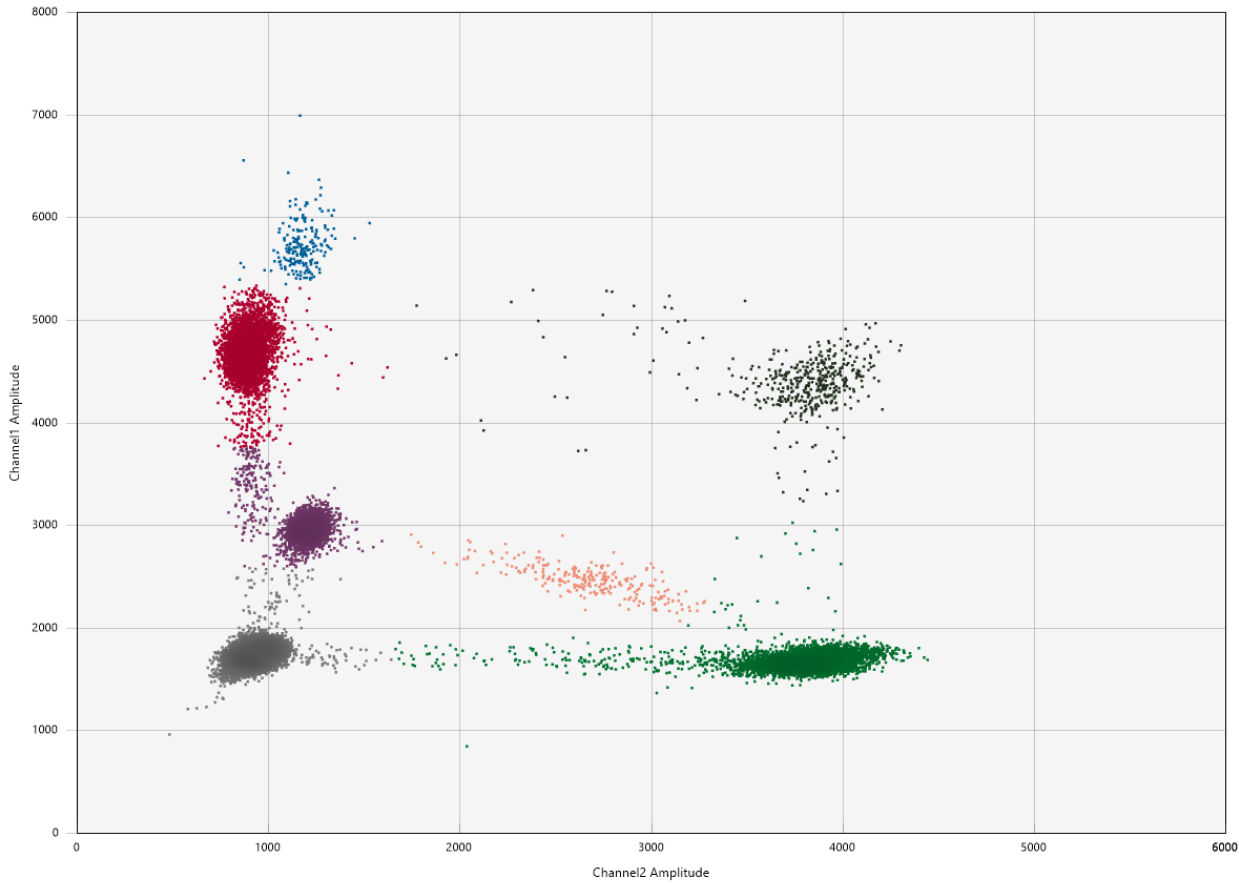

NK-plasma DNA

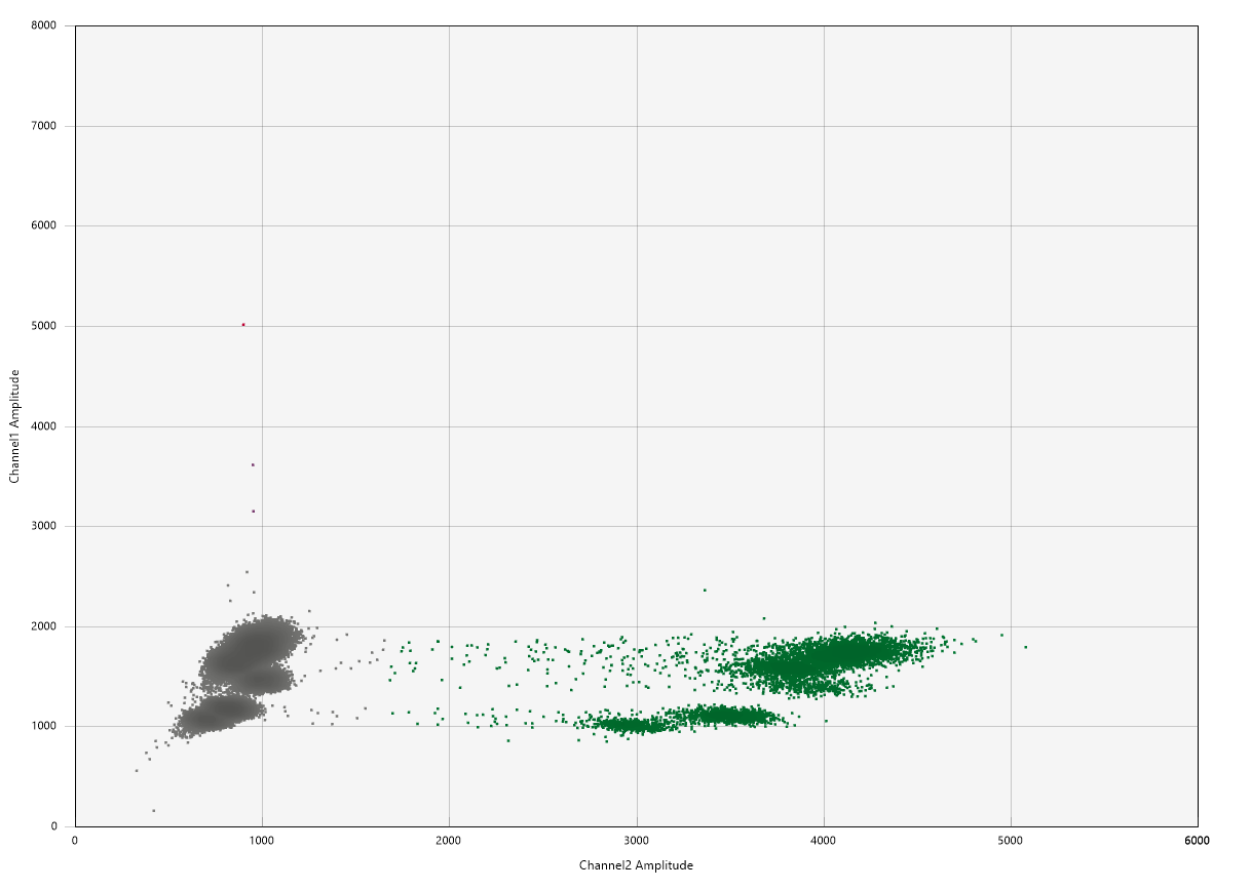

Pre-surgery

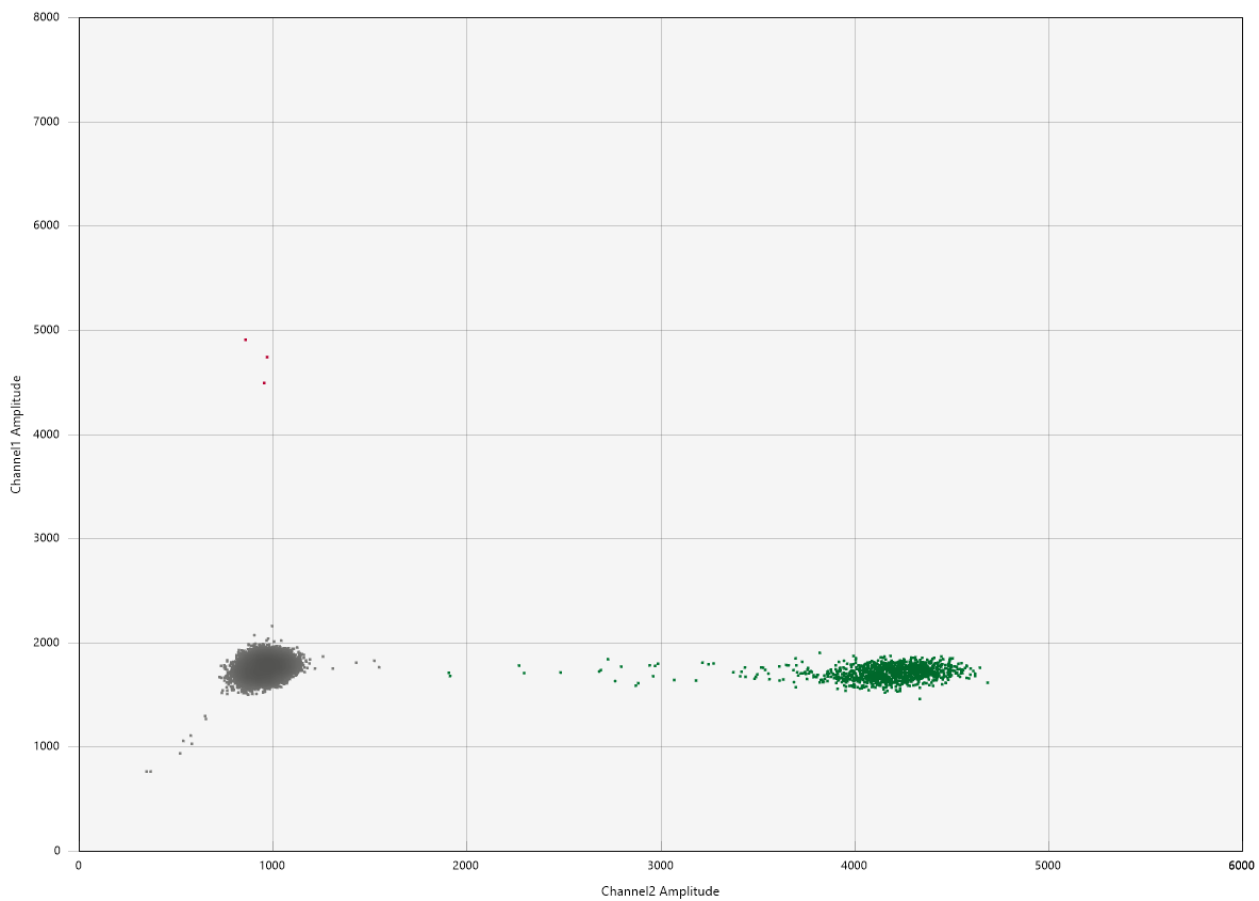

Post-surgery

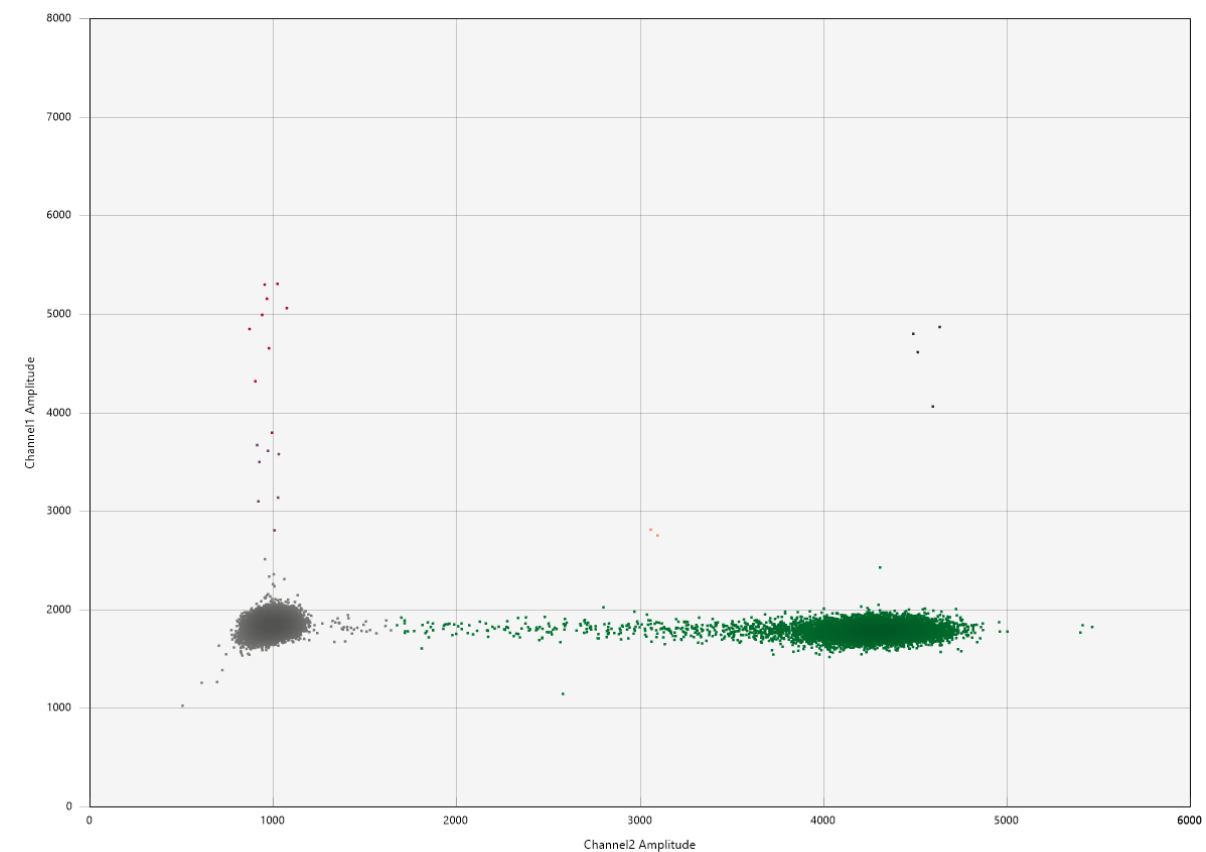

Concentration plots

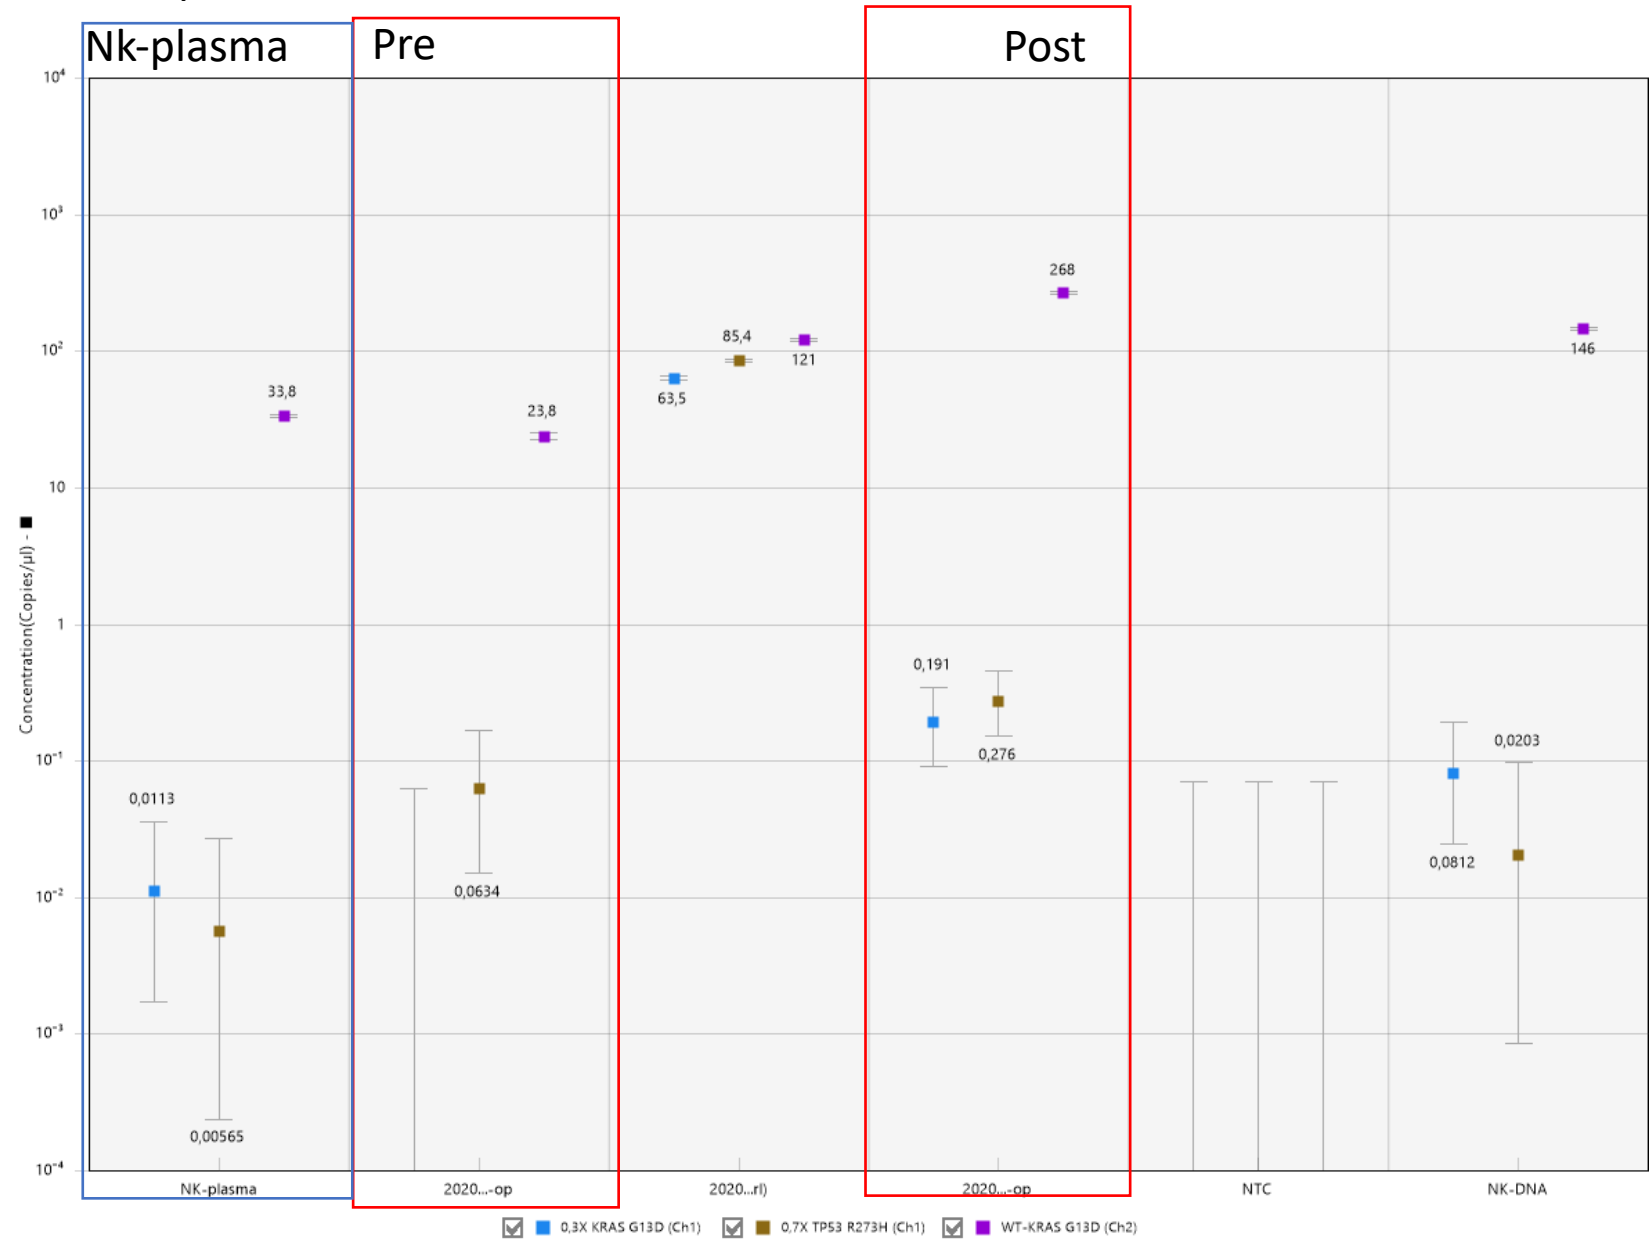

Assays: 0.7X TP53,p.R273H mut (FAM) and 1Xdark probe for TP53,p.R273H  
0.3X KRAS p.G13D mut (FAM) and 1X KRAS WT p.G13D (HEX)

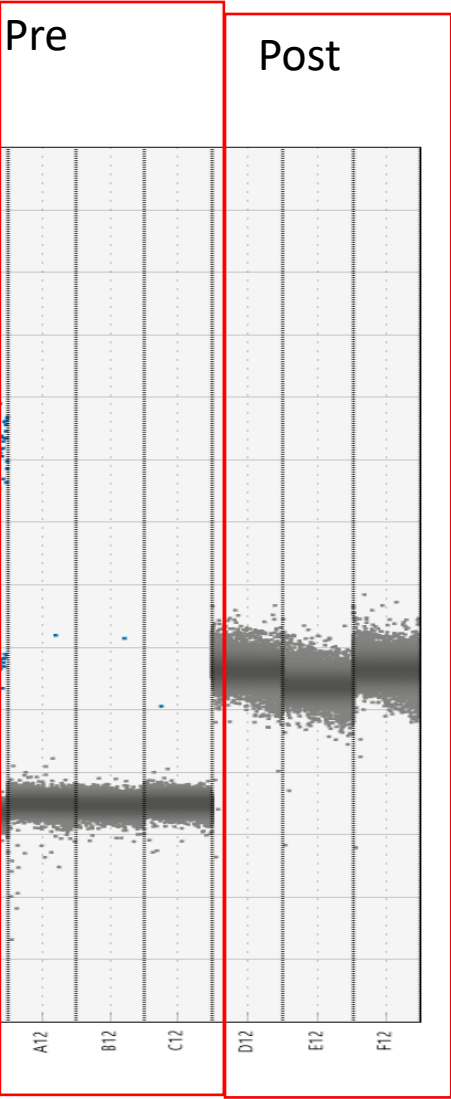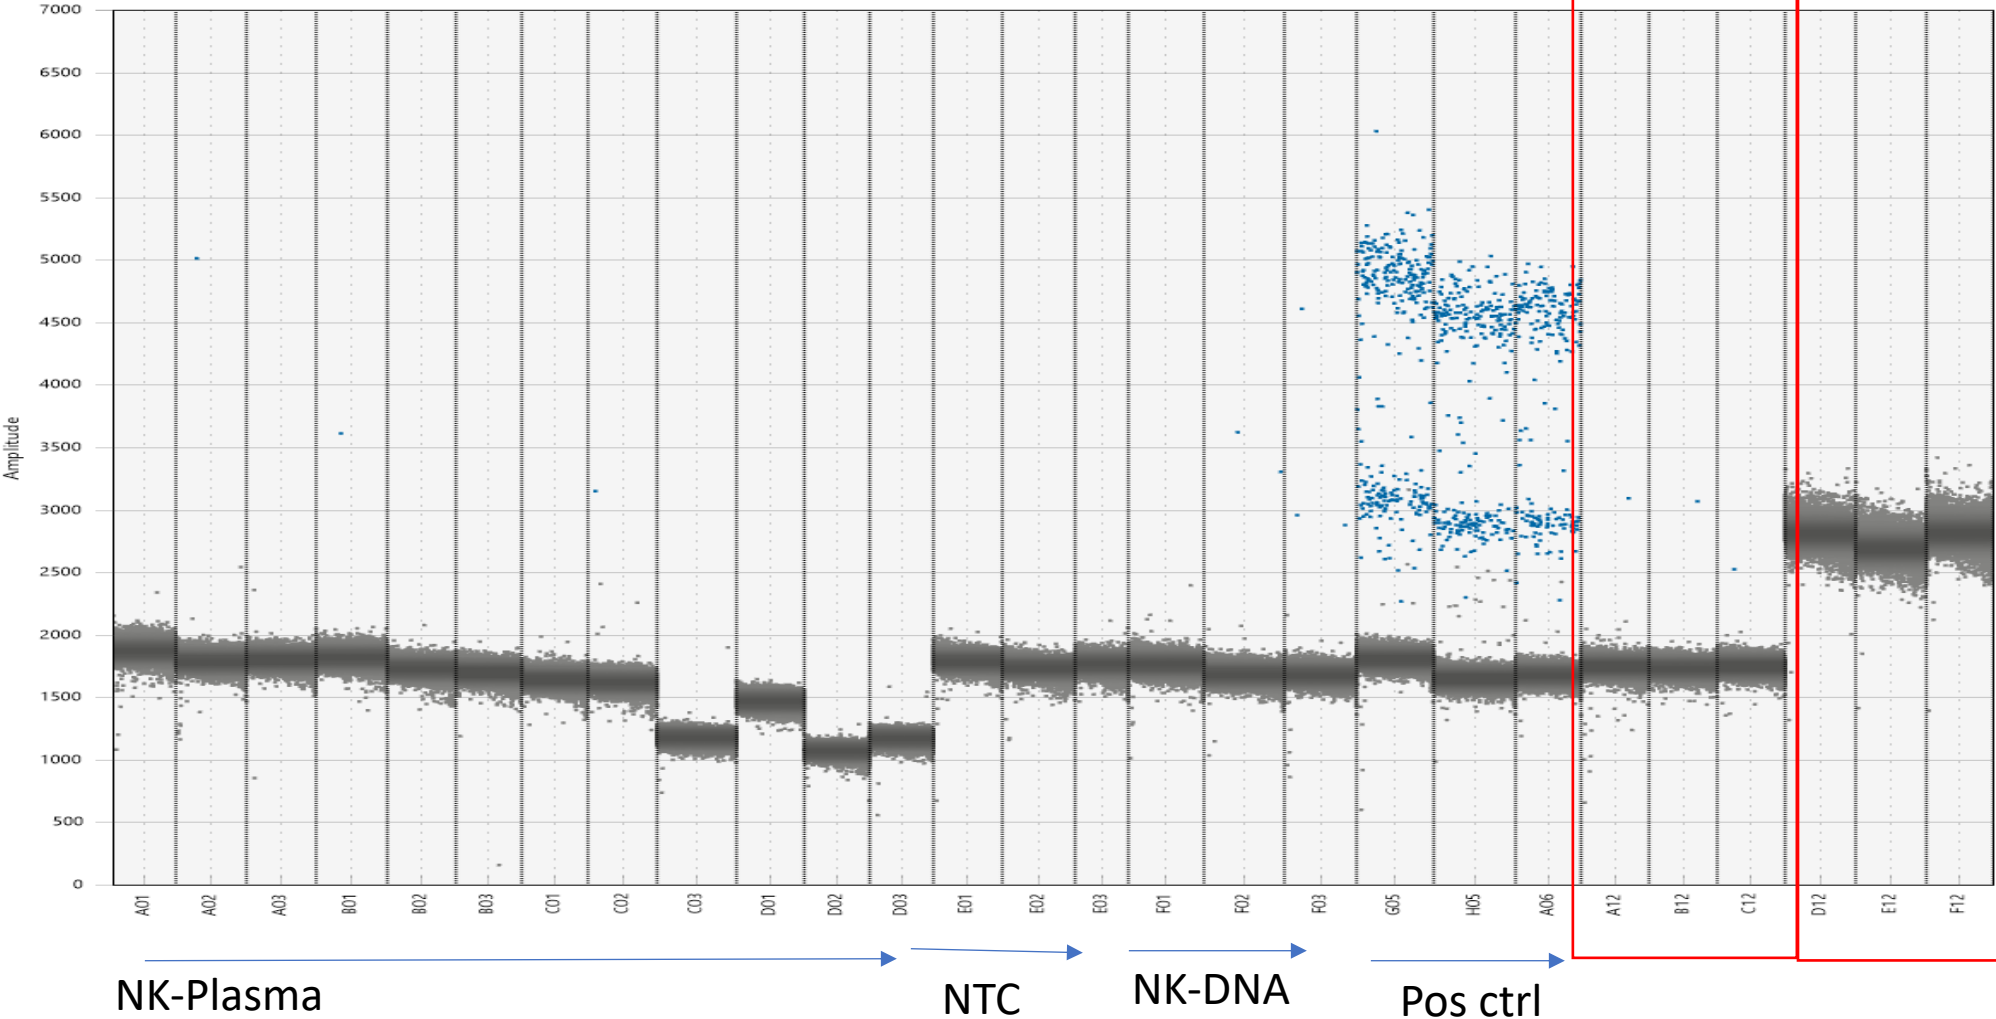

0.7X TP53,p.  
R273H mut

0.3X KRAS  
p.G13D mut

Assays: 1Xdark probe for TP53,p.R273H  
1X KRAS WT p.G13D (HEX)

0.3X KRAS  
WT p.G13D

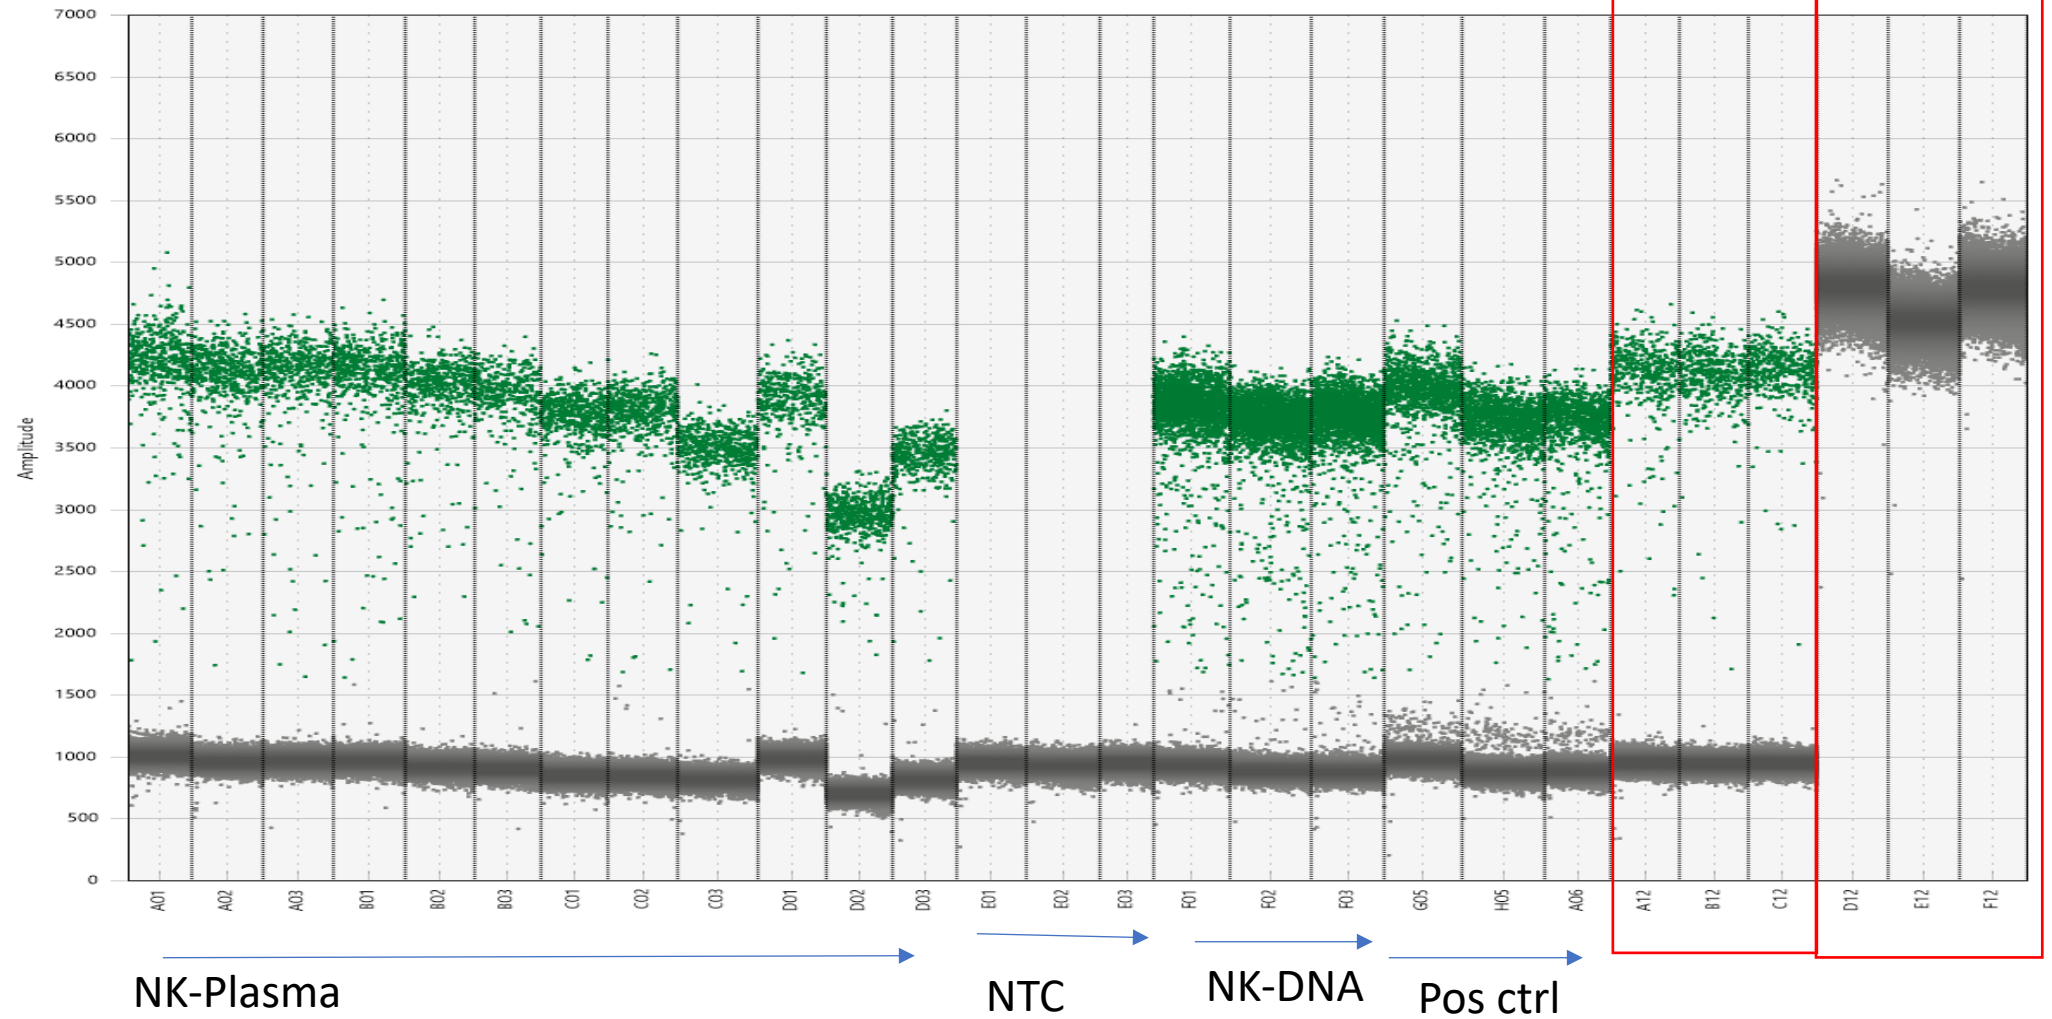

Assays: 0.7X TP53,p.R273H mut (FAM) and 1Xdark probe for TP53,p.R273H  
0.3X KRAS p.G13D mut (FAM) and 1X KRAS WT p.G13D (HEX)

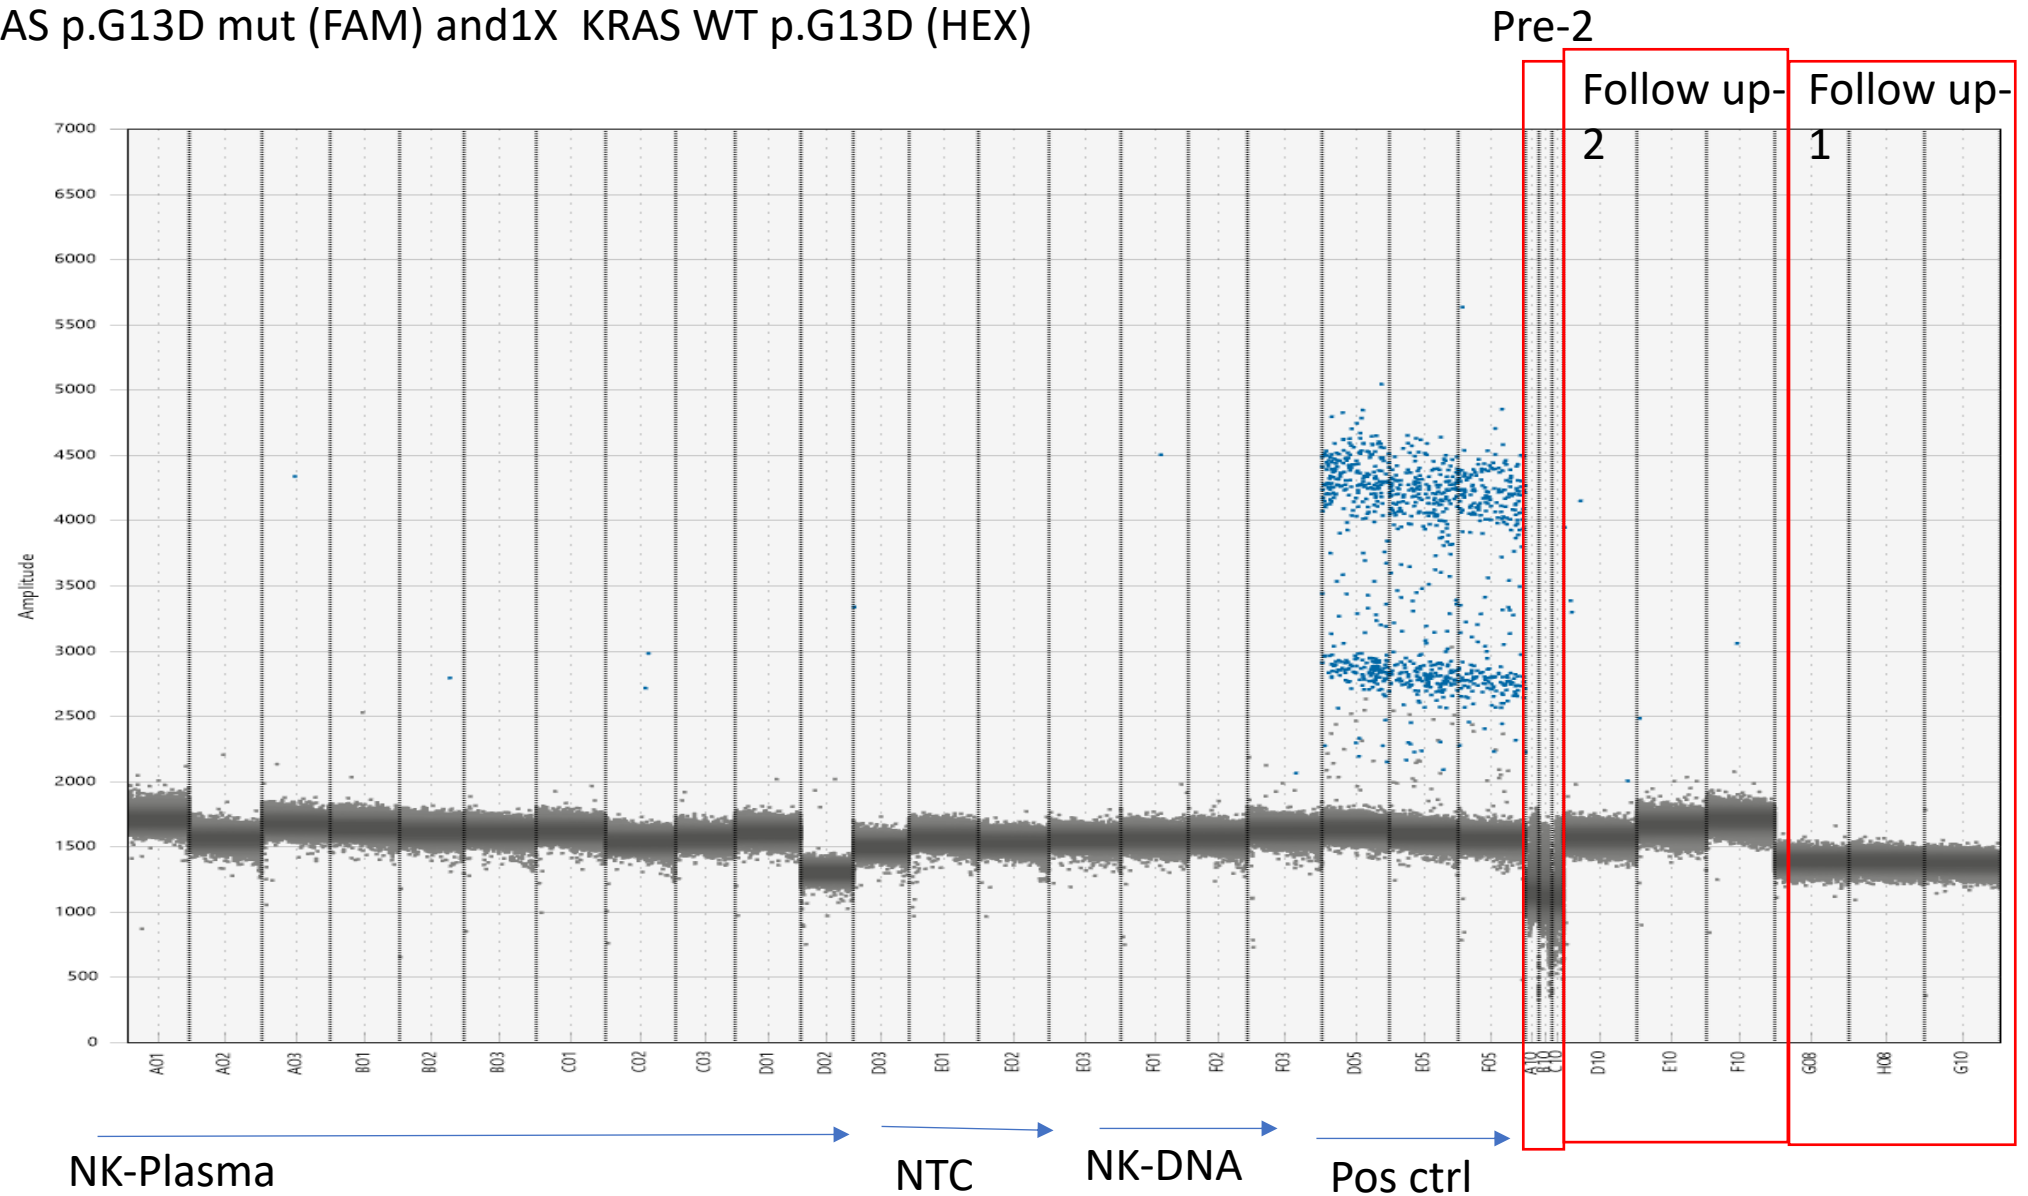

Assays: 1Xdark probe for TP53,p.R273H

1X KRAS WT p.G13D (HEX)

0.3X KRAS  
WT p.G13D
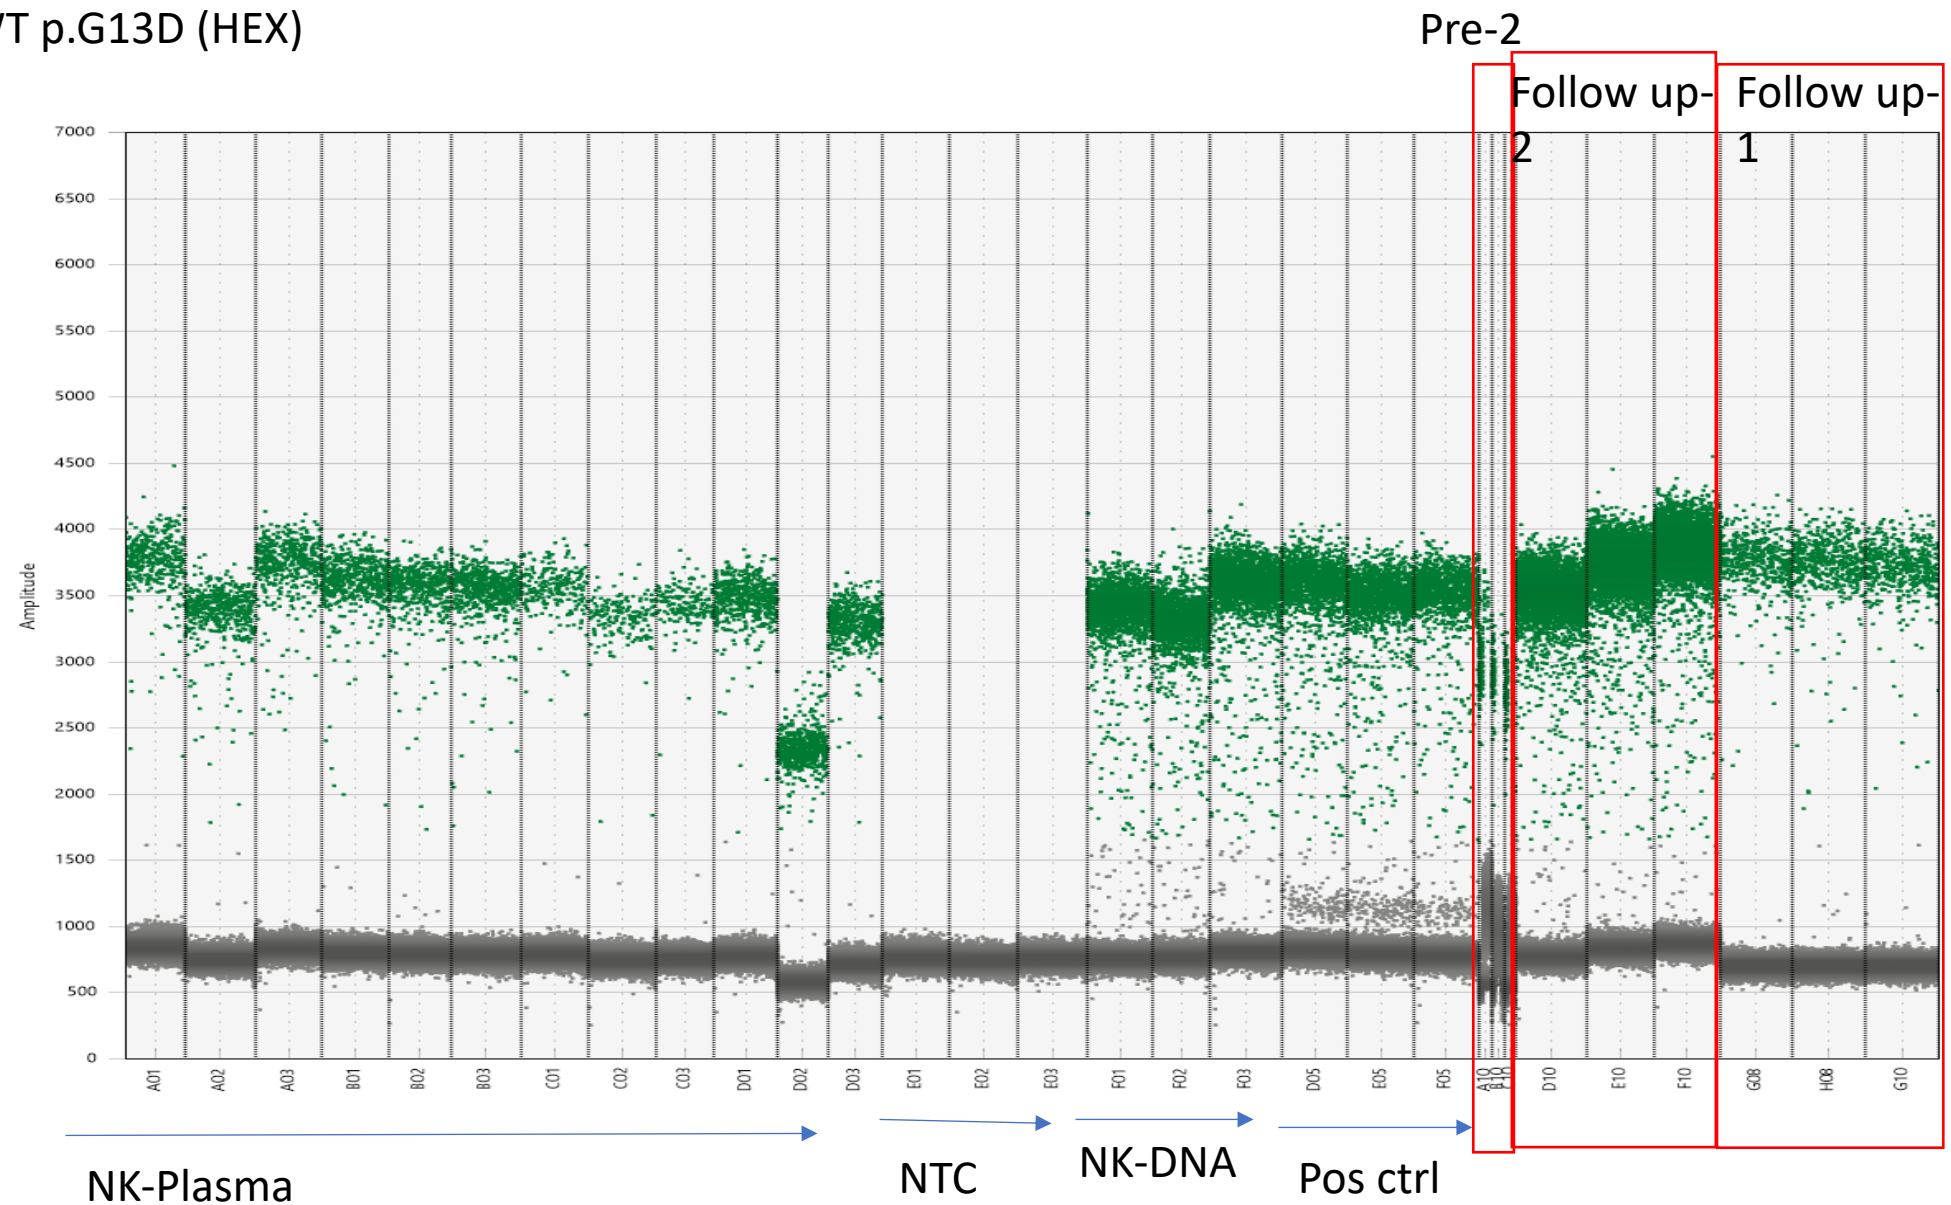

P23 -diluted

Gene target : TP53,p.R273H, c.818G>A and KRAS,p.G13D, c.38G>A

Assays: 0.7X TP53,p.R273H mut (FAM) and 1Xdark probe for TP53,p.R273H  
0.3X KRAS p.G13D mut (FAM) and1X KRAS WT p.G13D (HEX)

0.7X TP53,p.  
R273H mut

0.3X KRAS  
p.G13D mut

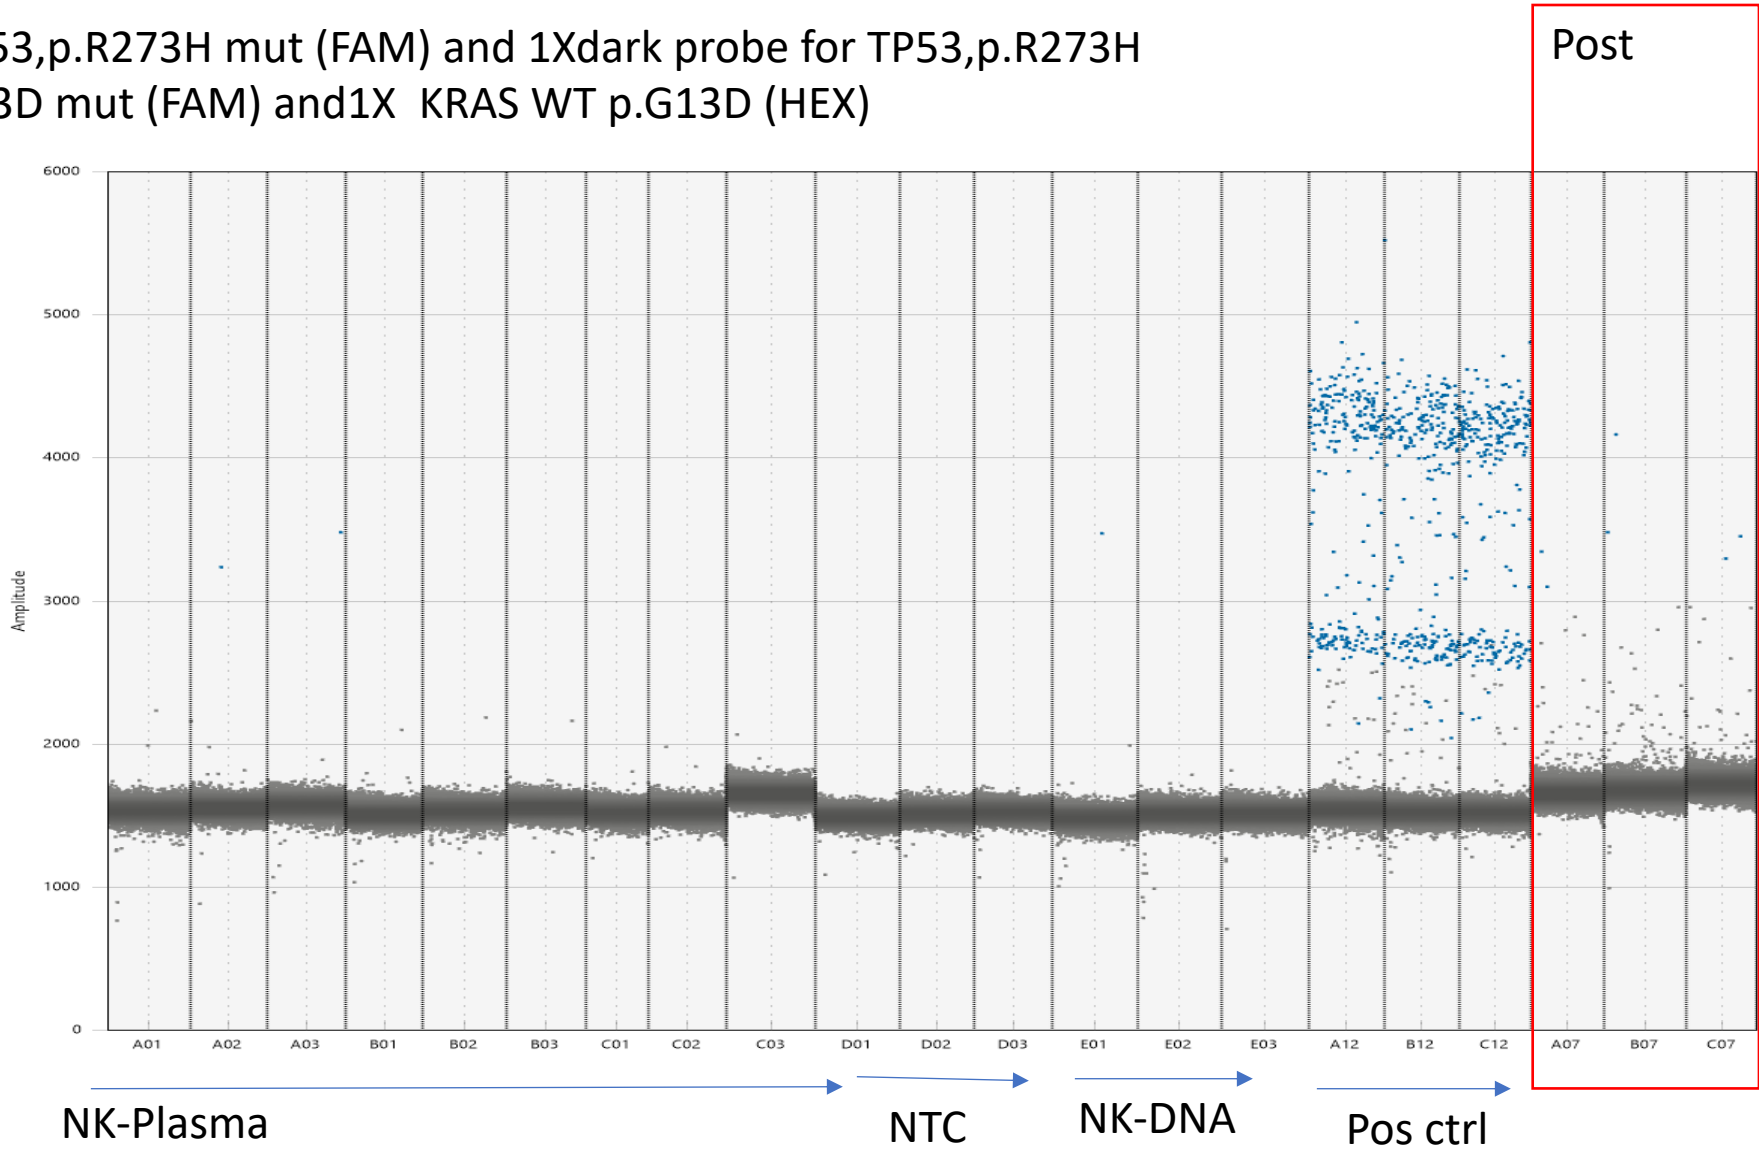

Assays: 1Xdark probe for TP53,p.R273H  
1X KRAS WT p.G13D (HEX)

0.3X KRAS  
WT p.G13D

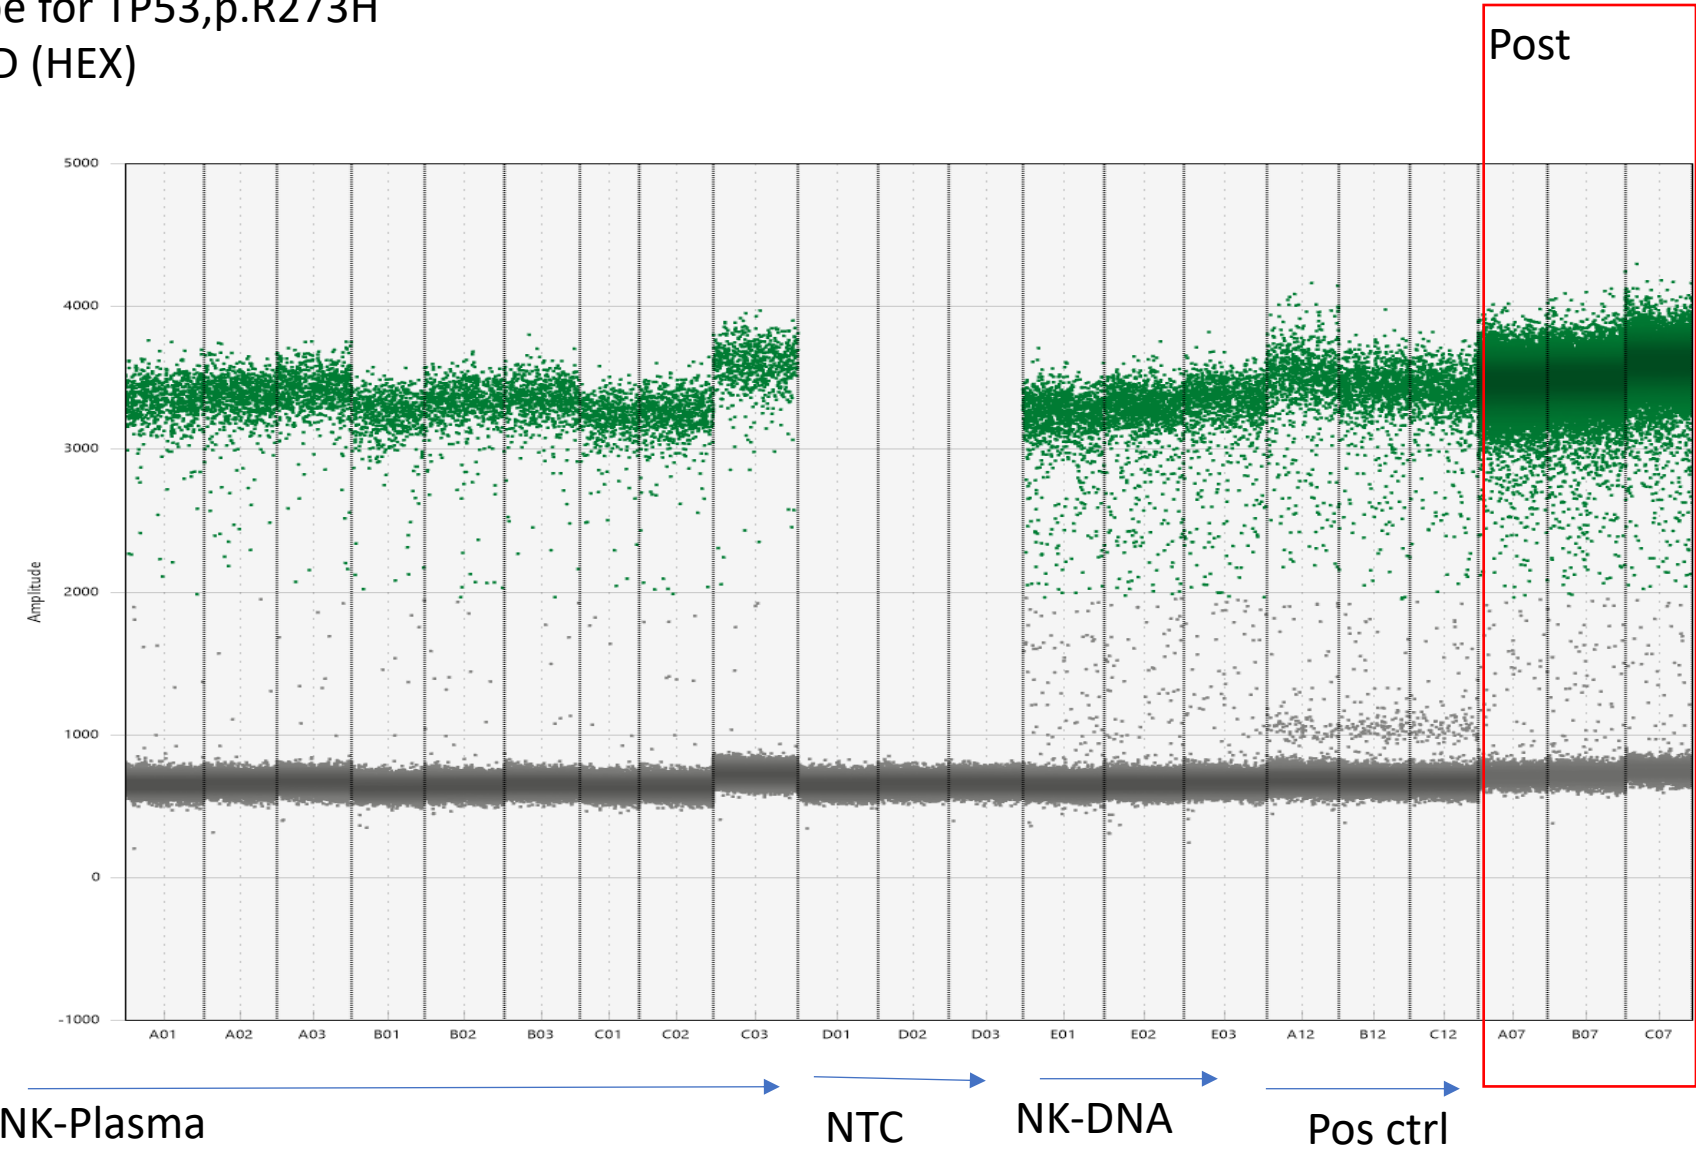

Positive control

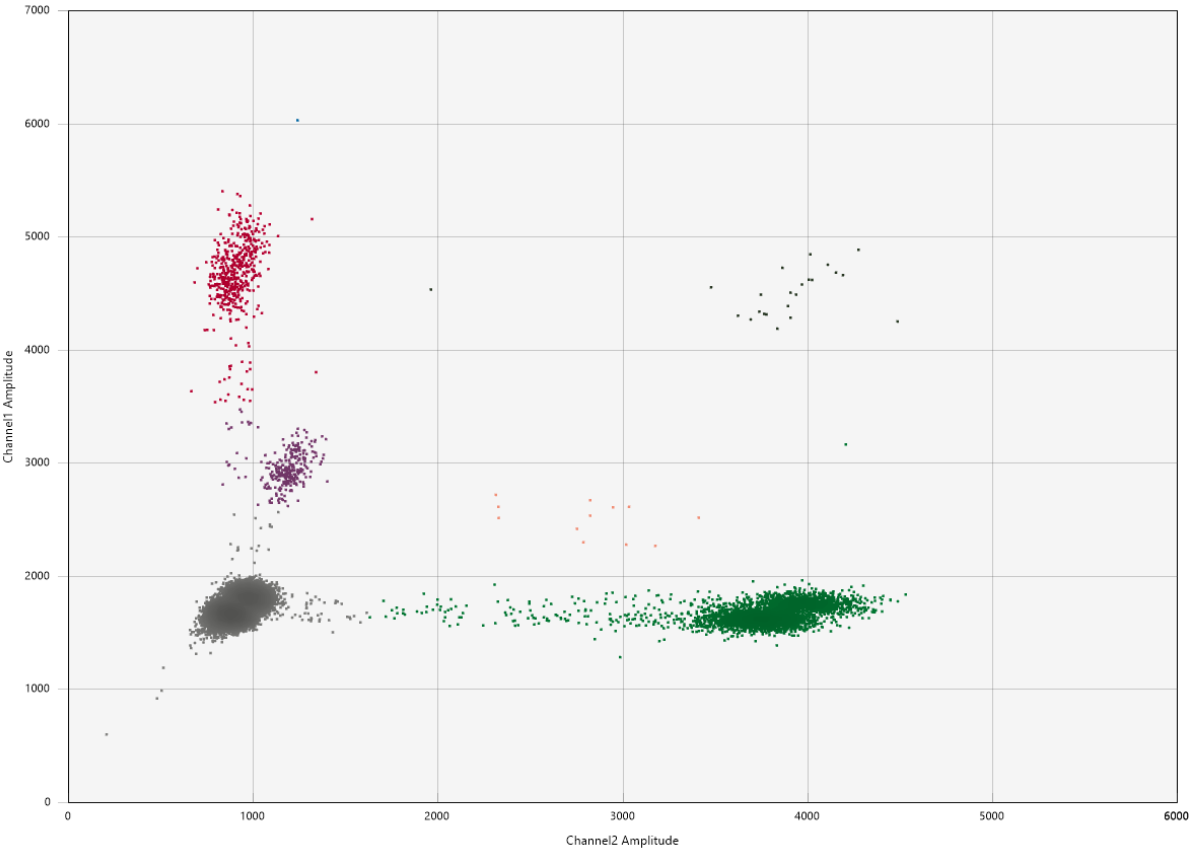

Nk-Plasma

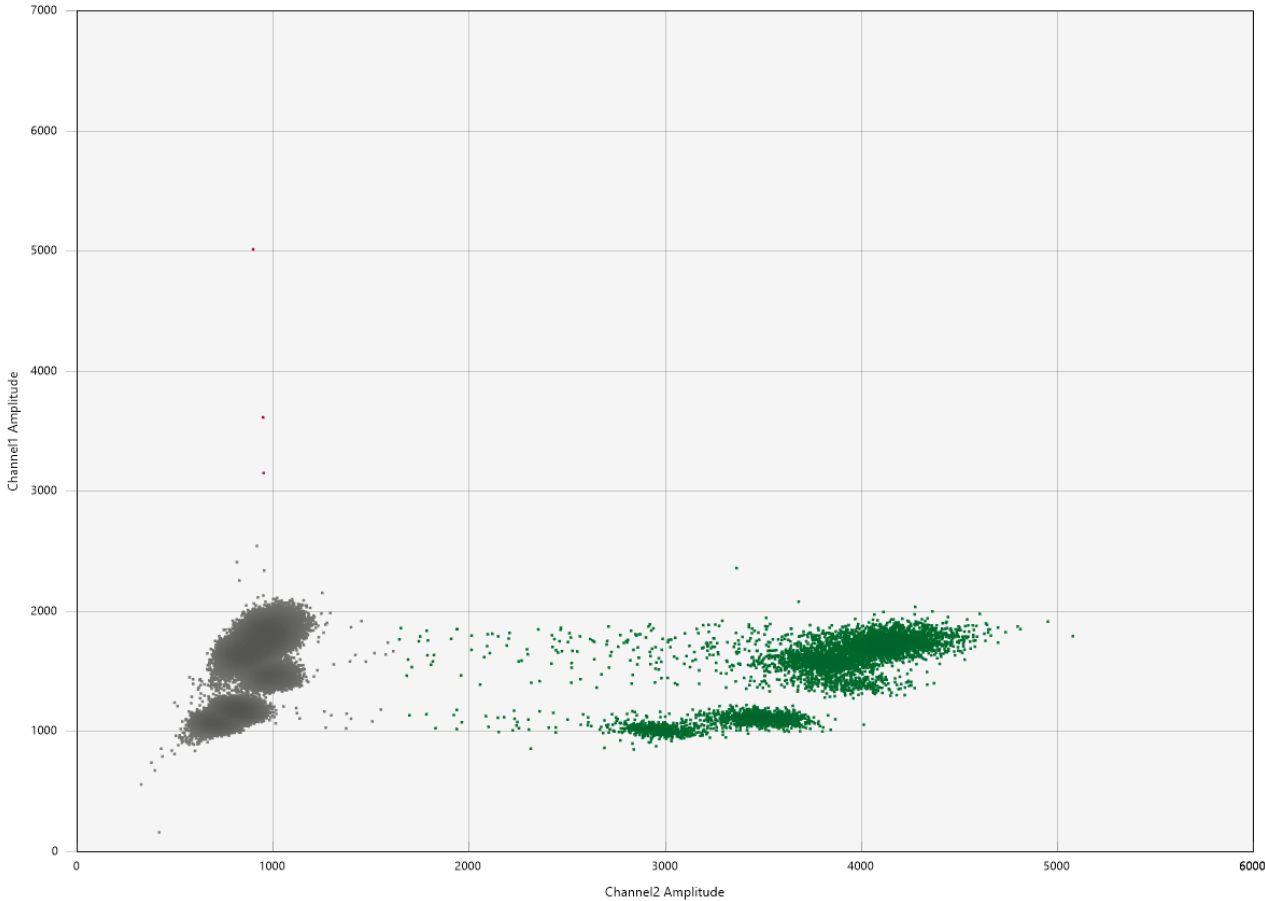

Pre-surgery

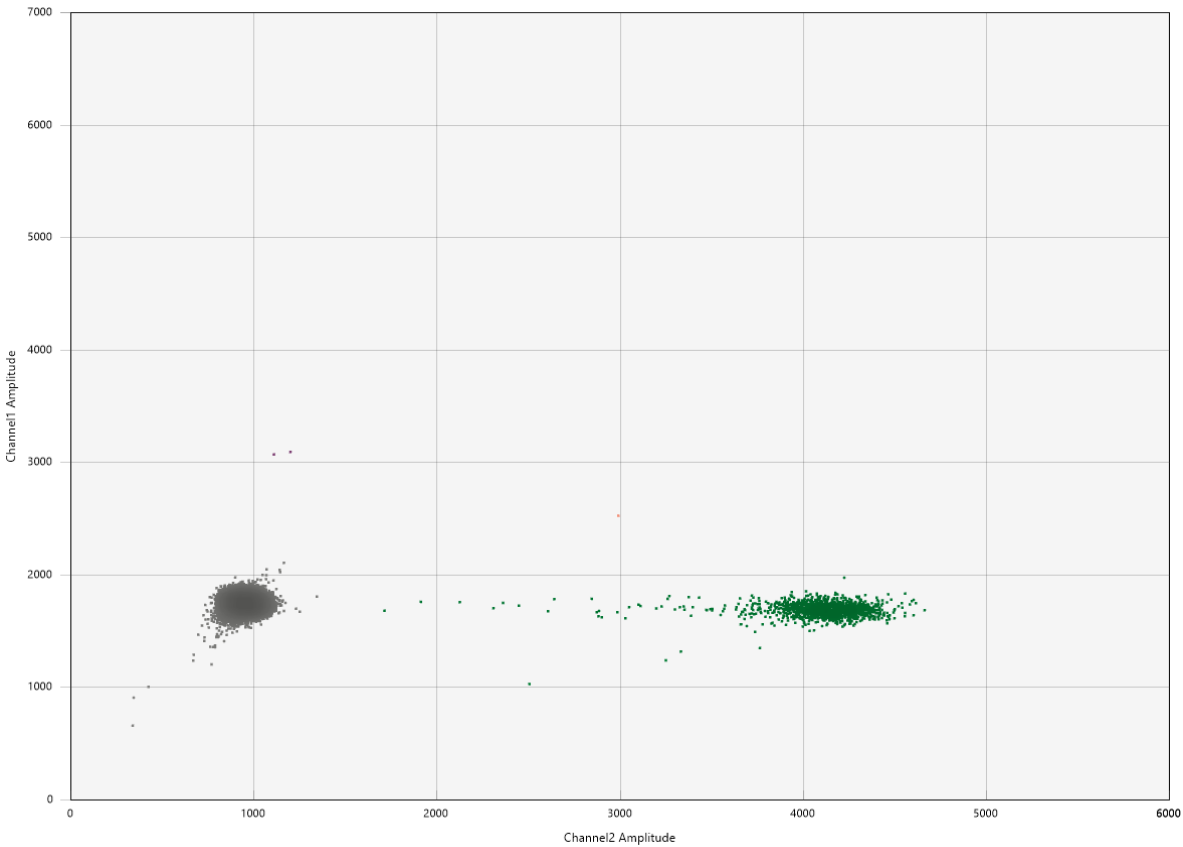

Pre-surgery-2

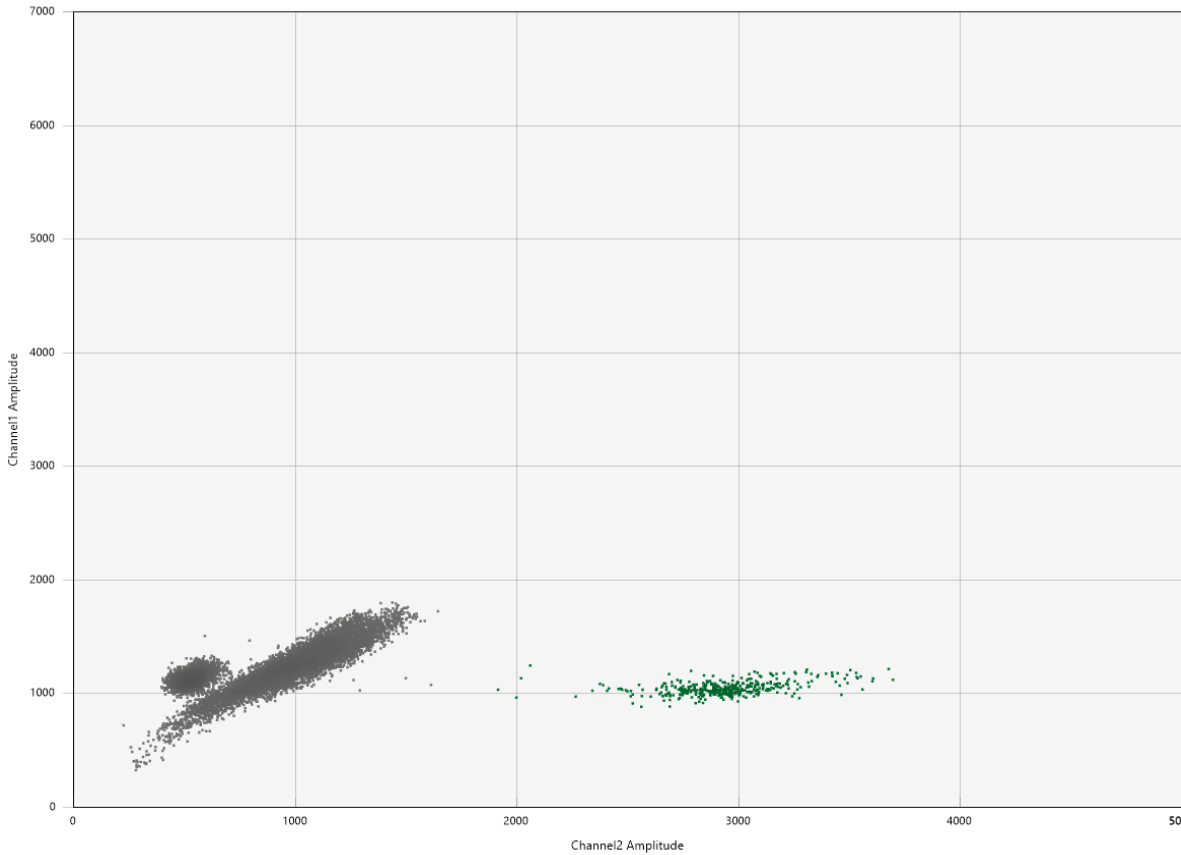

Post-surgery\*

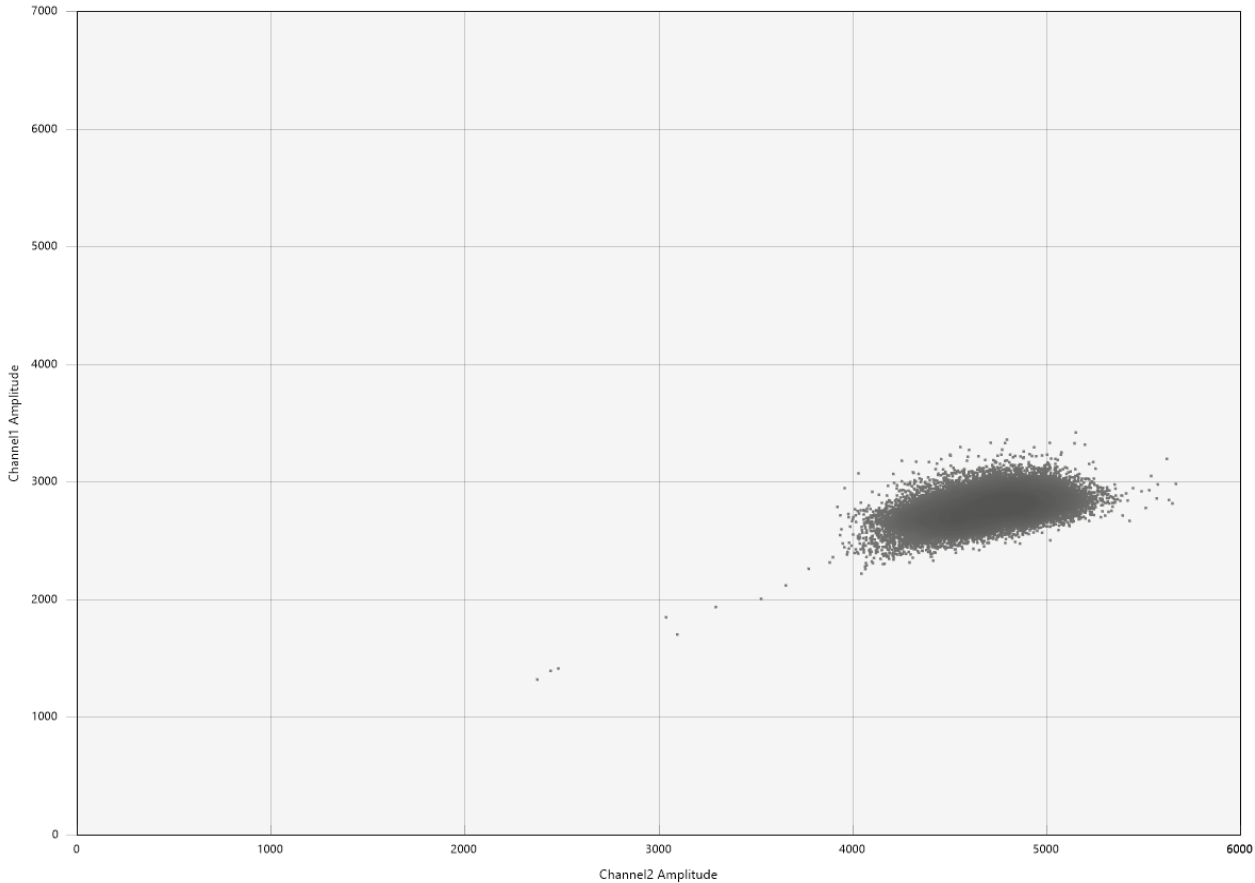

Post-surgery\*- diluted

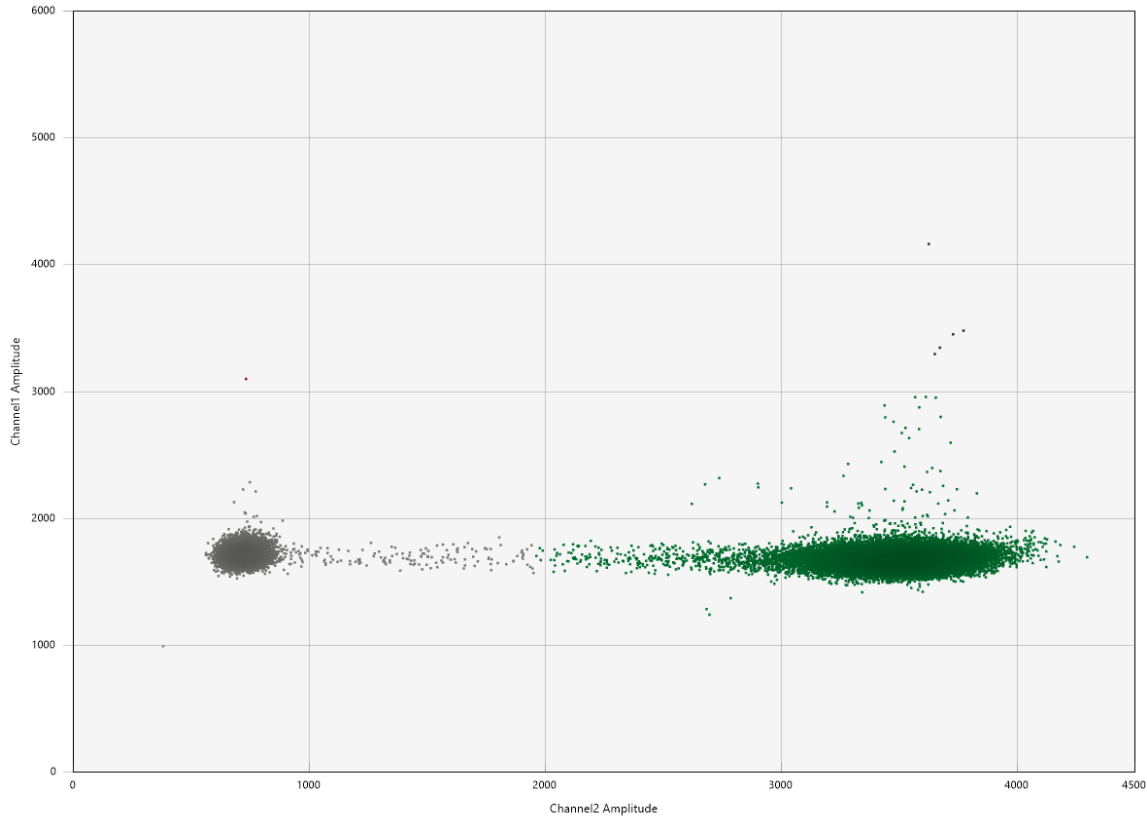

Follow- up-1

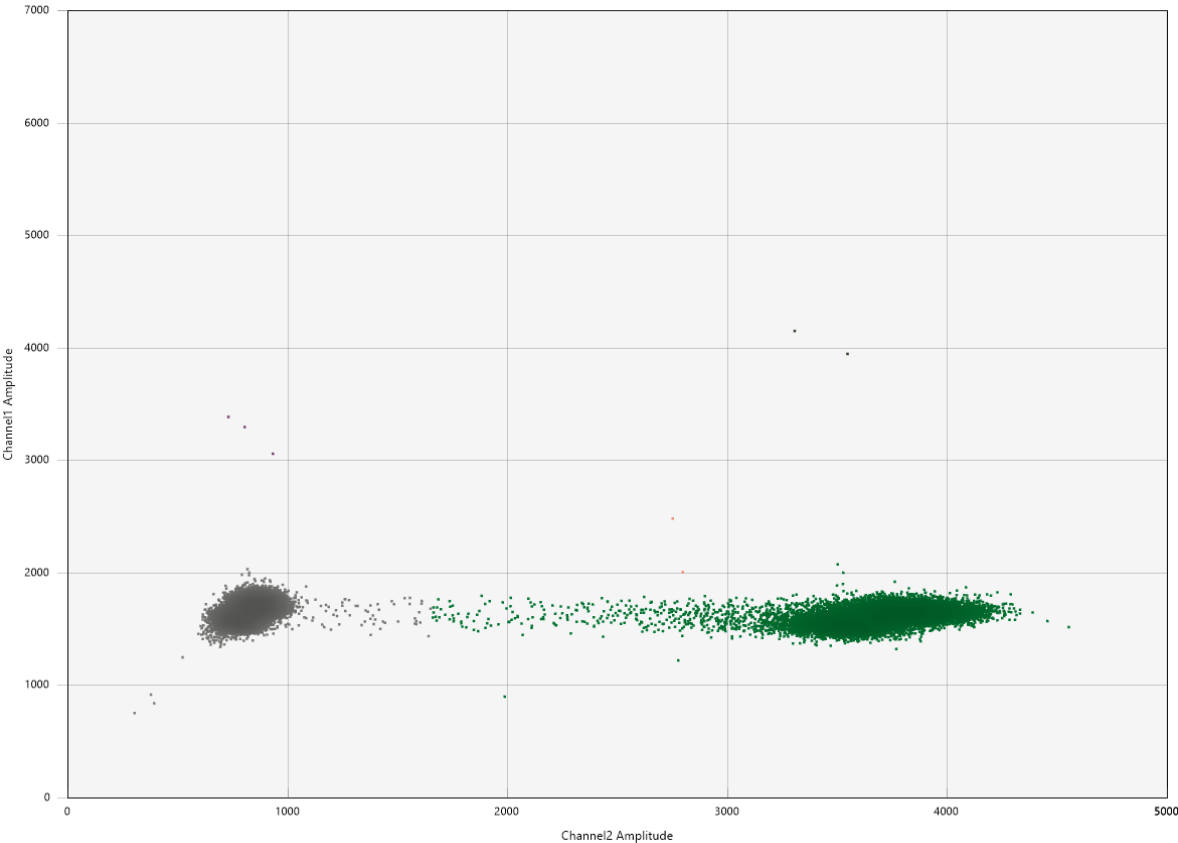

Follow-up-2

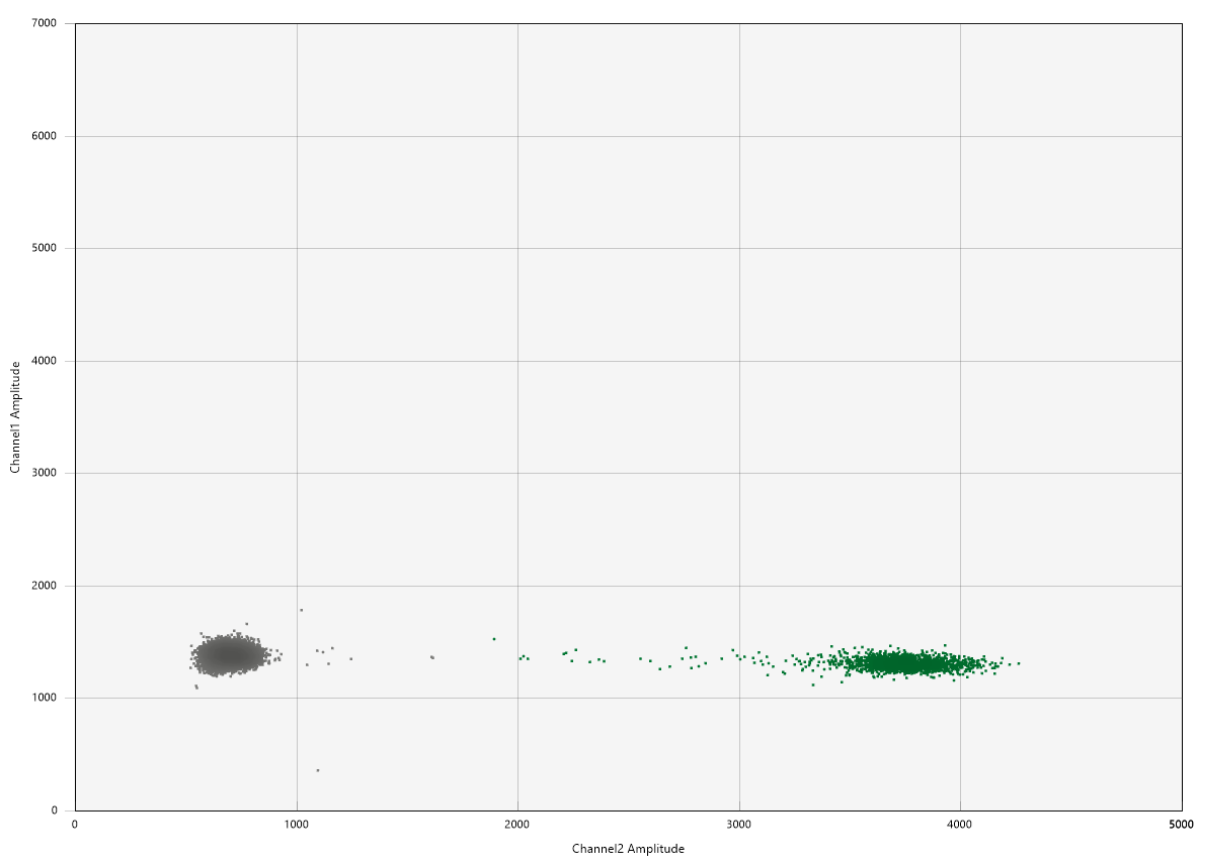

Concentration plots

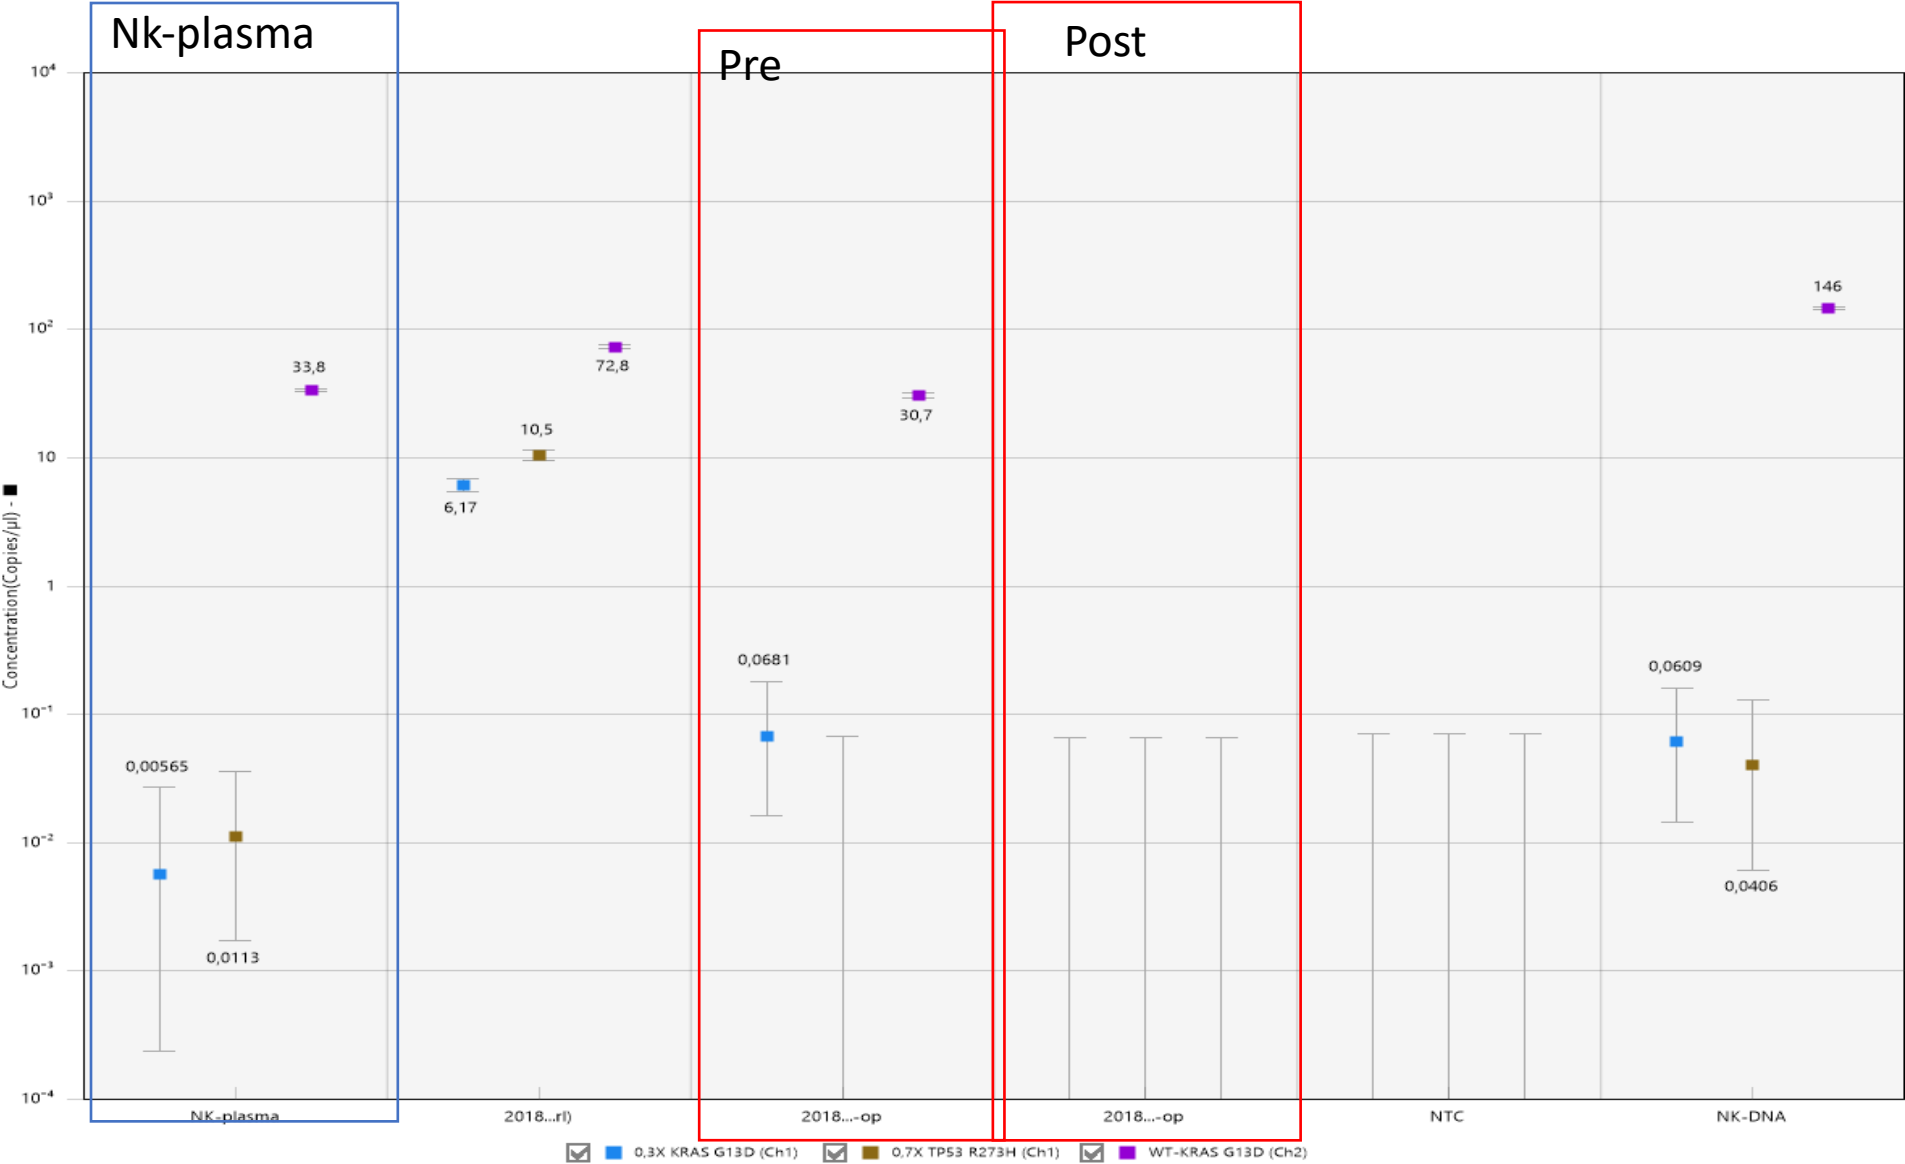

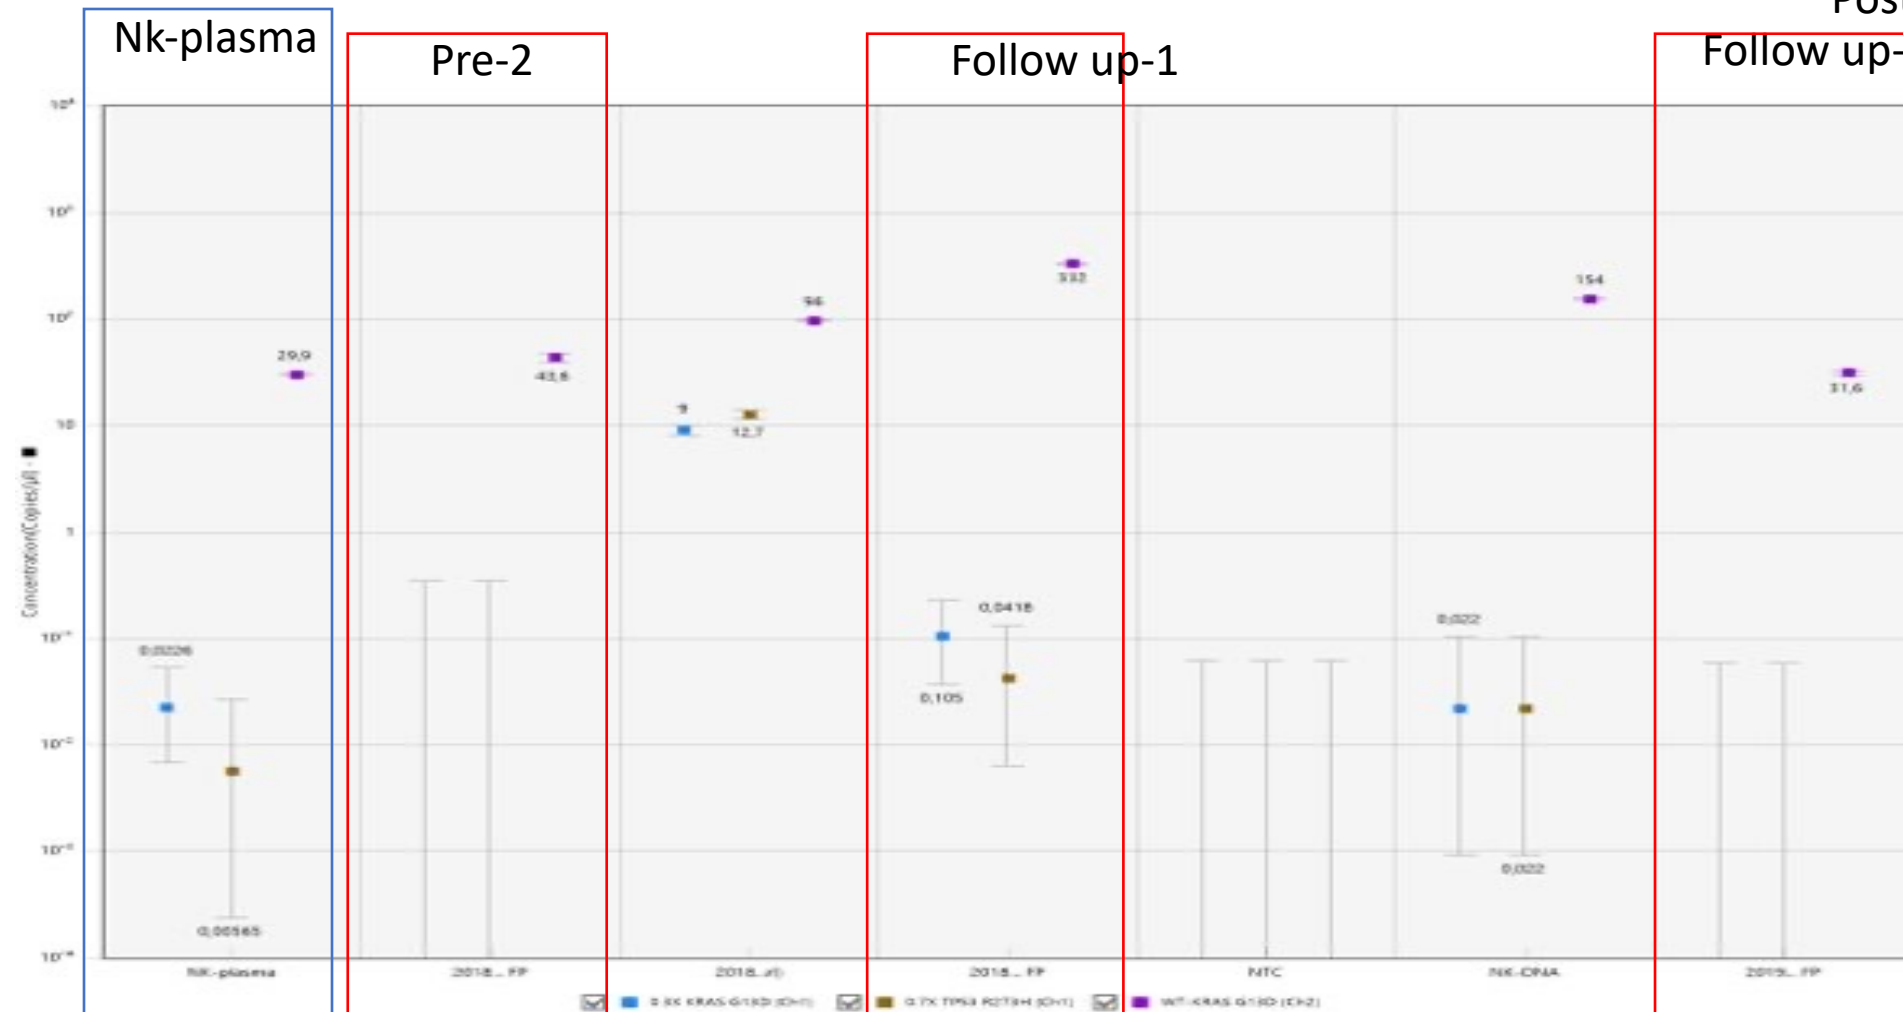

Post- surgery - diluted

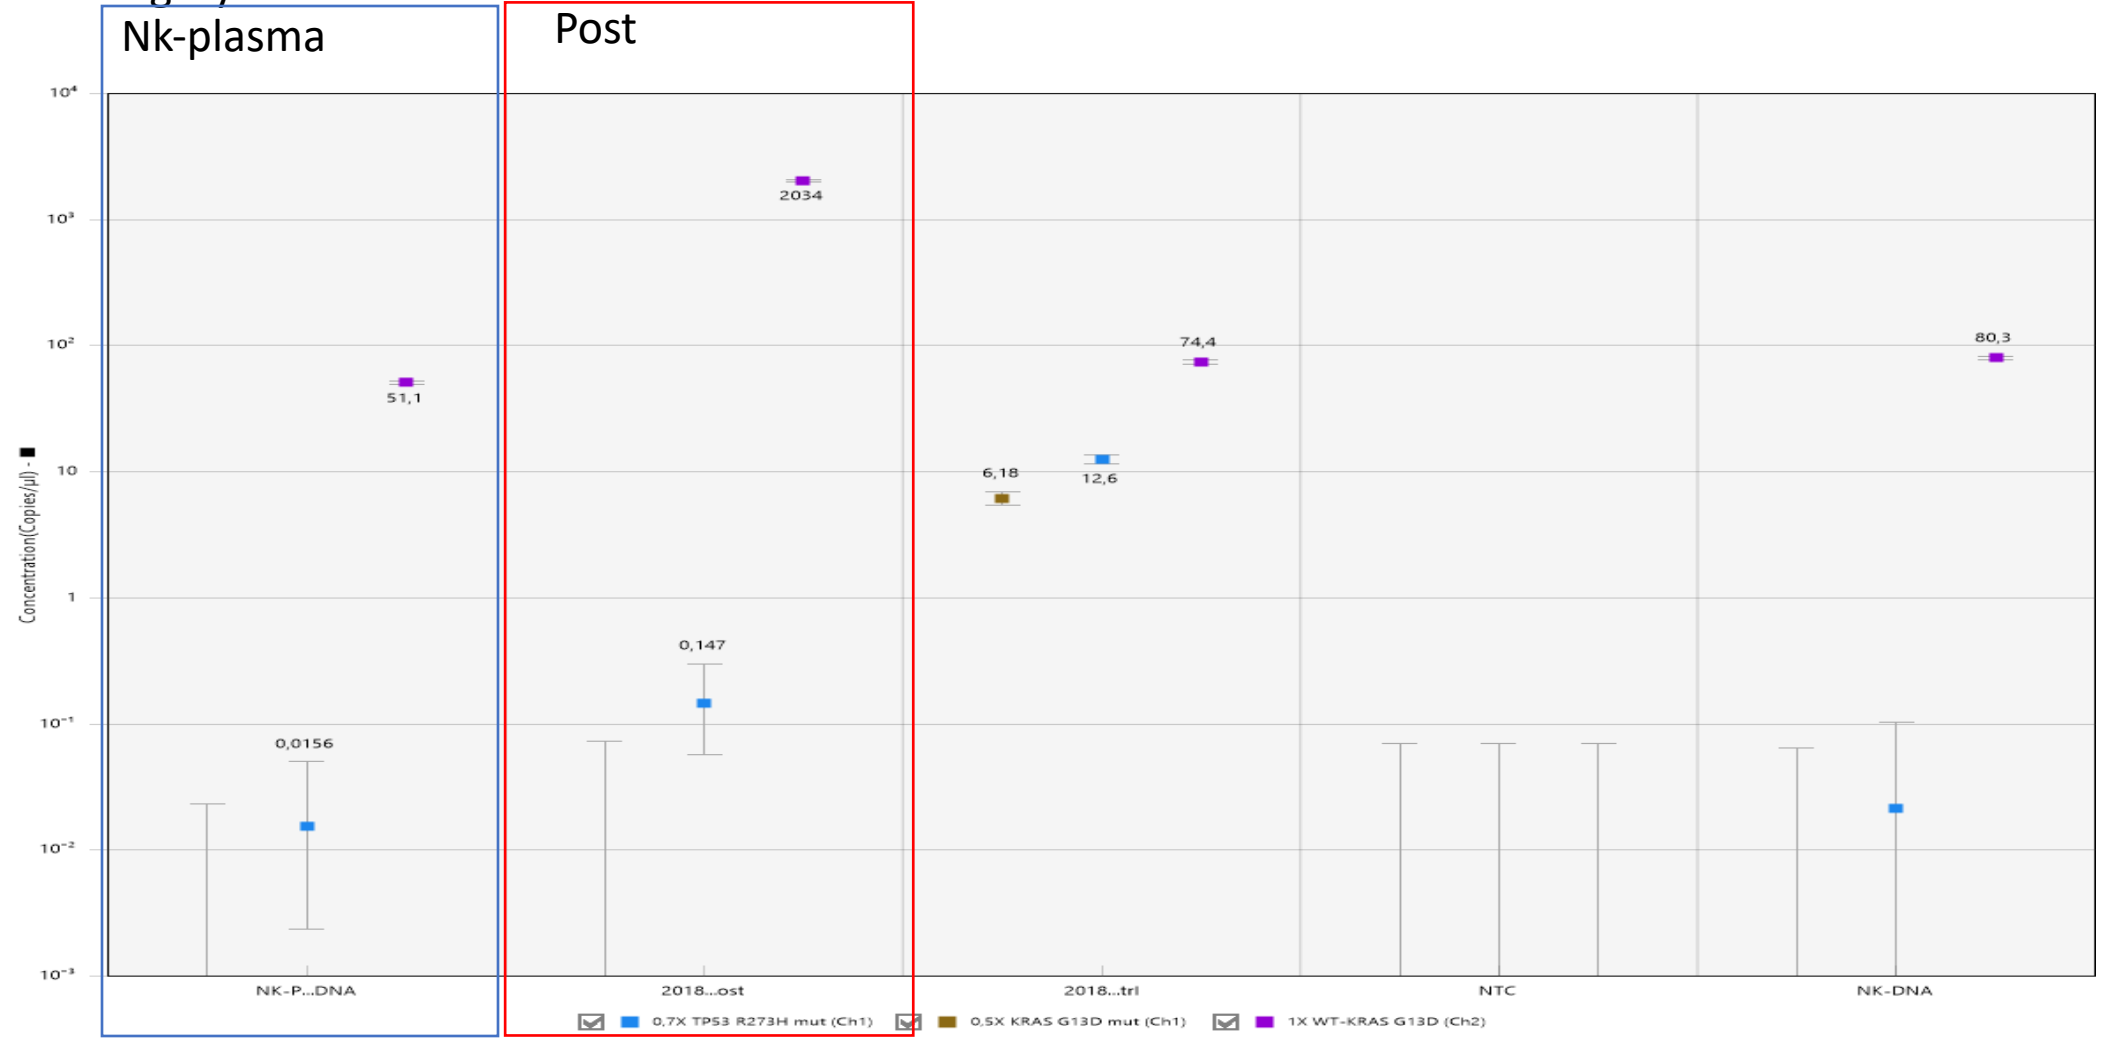

Assays: 0.5X TP53,c.720\_766del mut (FAM)  
1X APC, p. R823\* mut (FAM) and 1X APC WT, p. R823\* (HEX)

1X APC, p.  
R823\* mut

0.5X TP53  
,c.720\_76  
6del

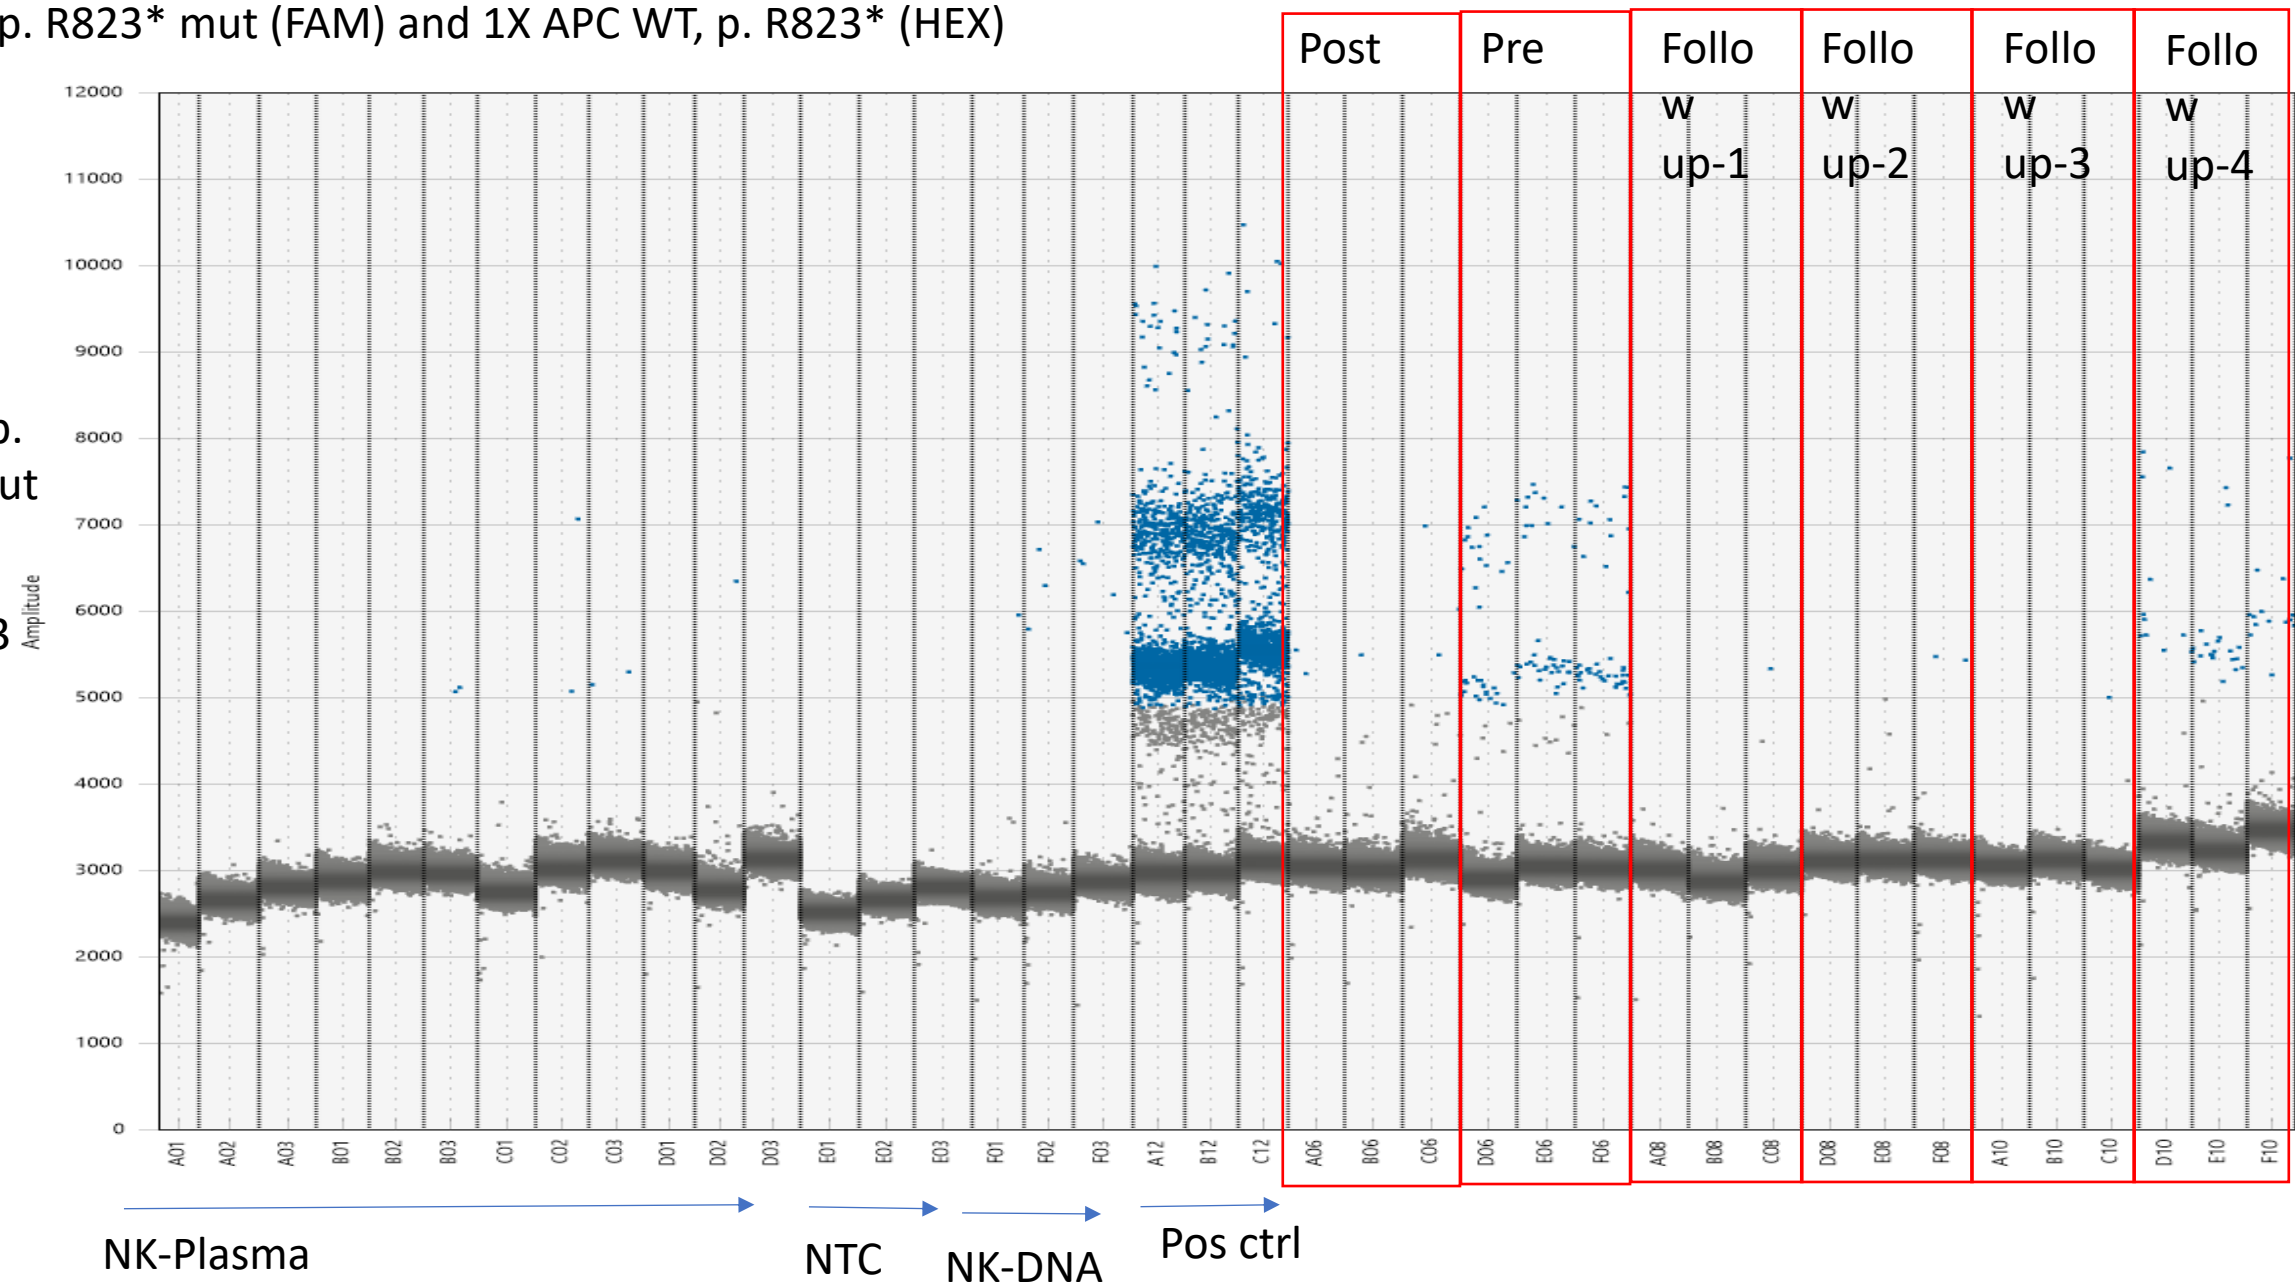

Assays: 1X APC WT, p. R823\* (HEX)

1X APC WT, p.  
R823\*

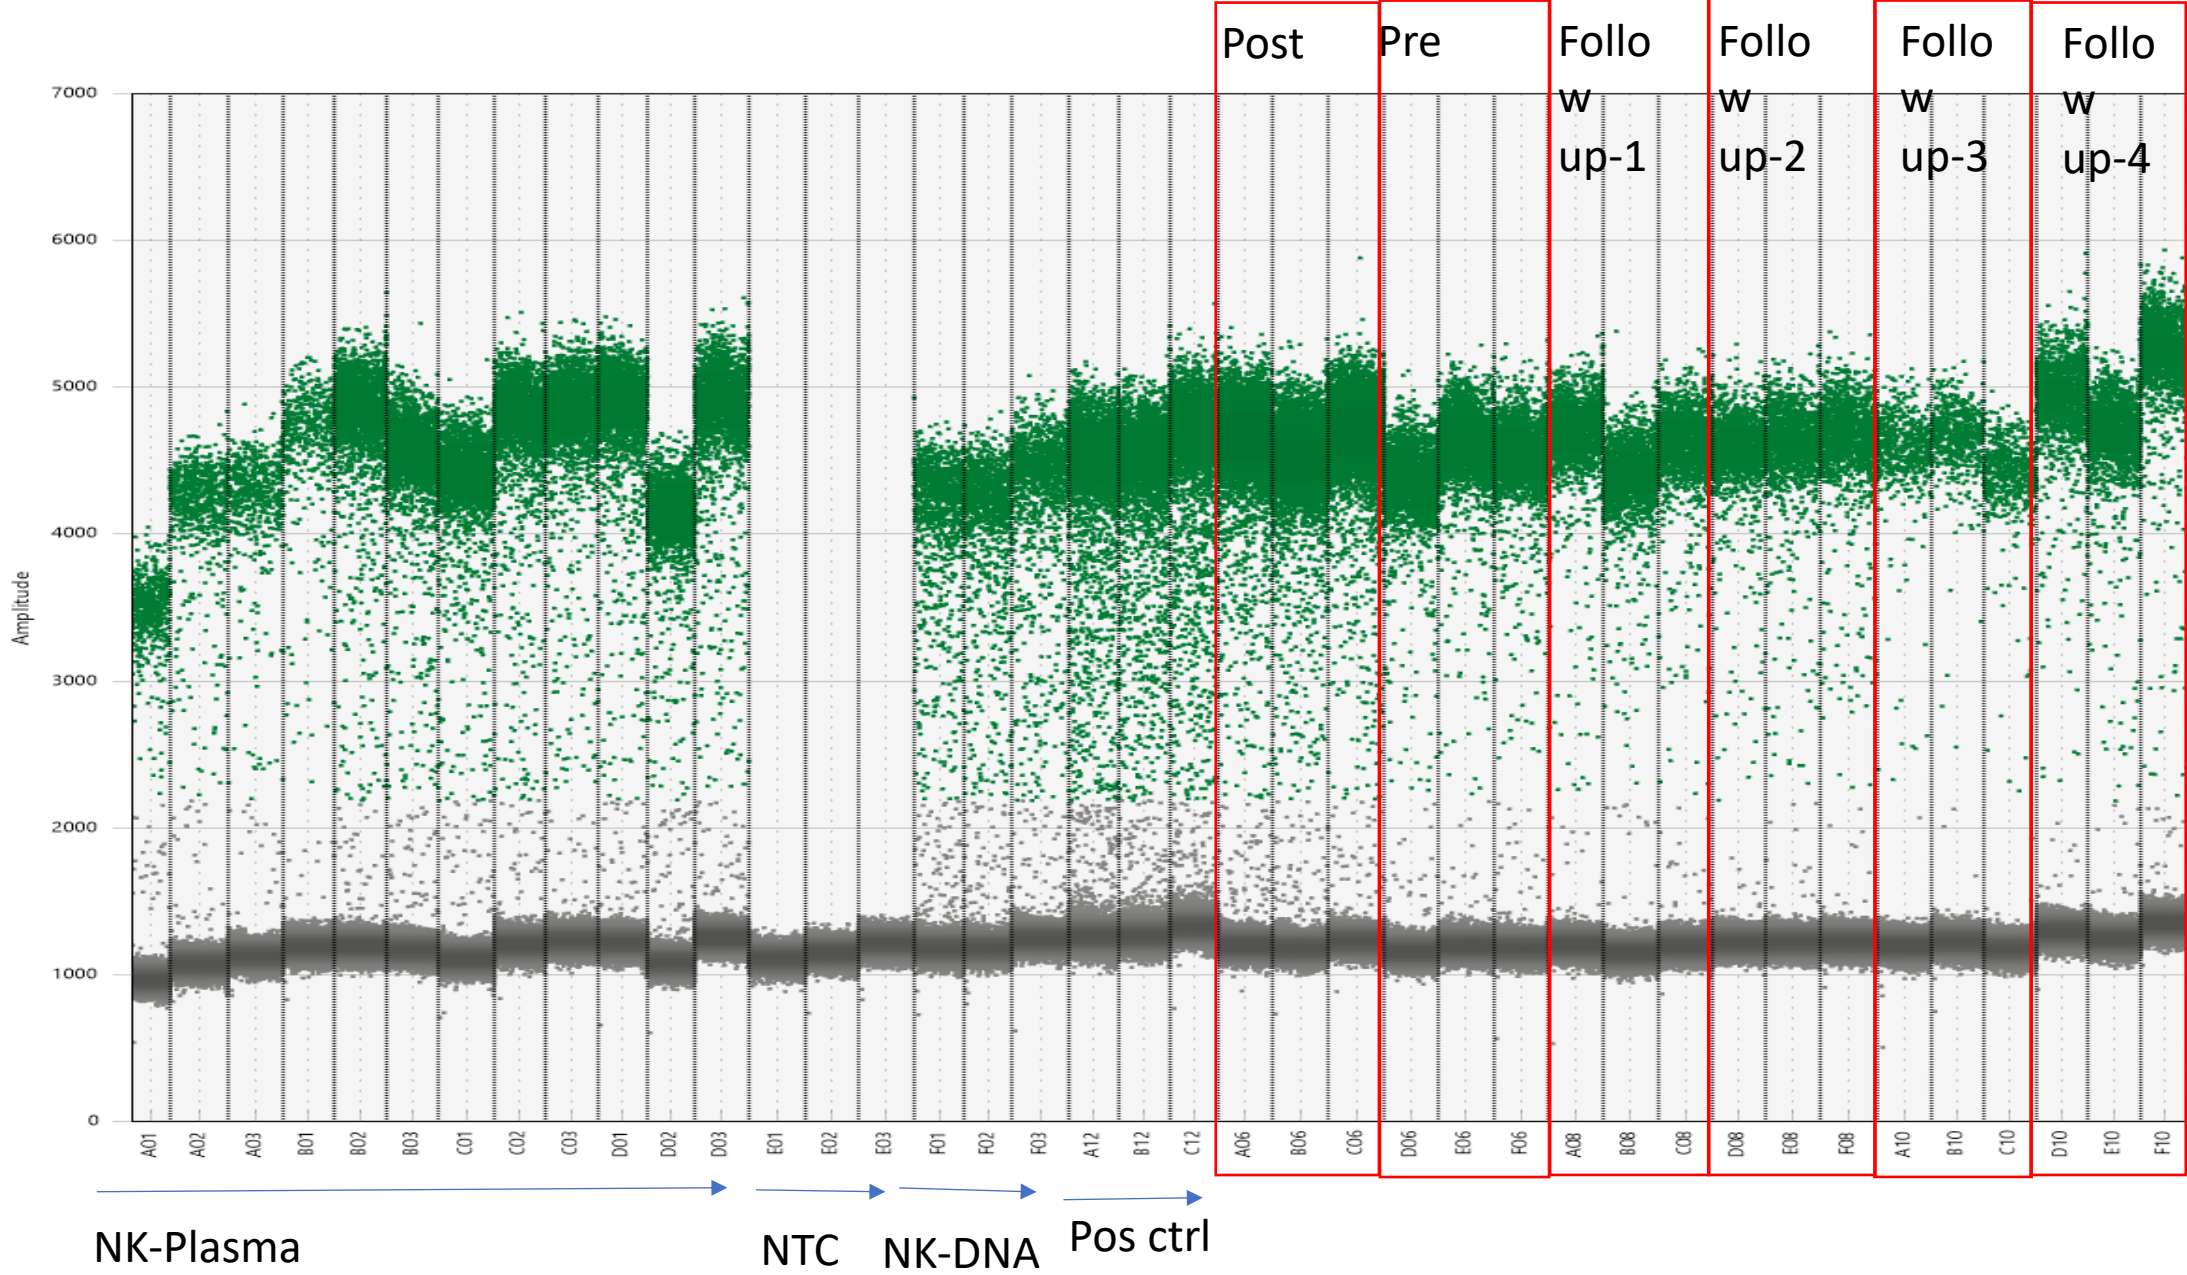

Positive control

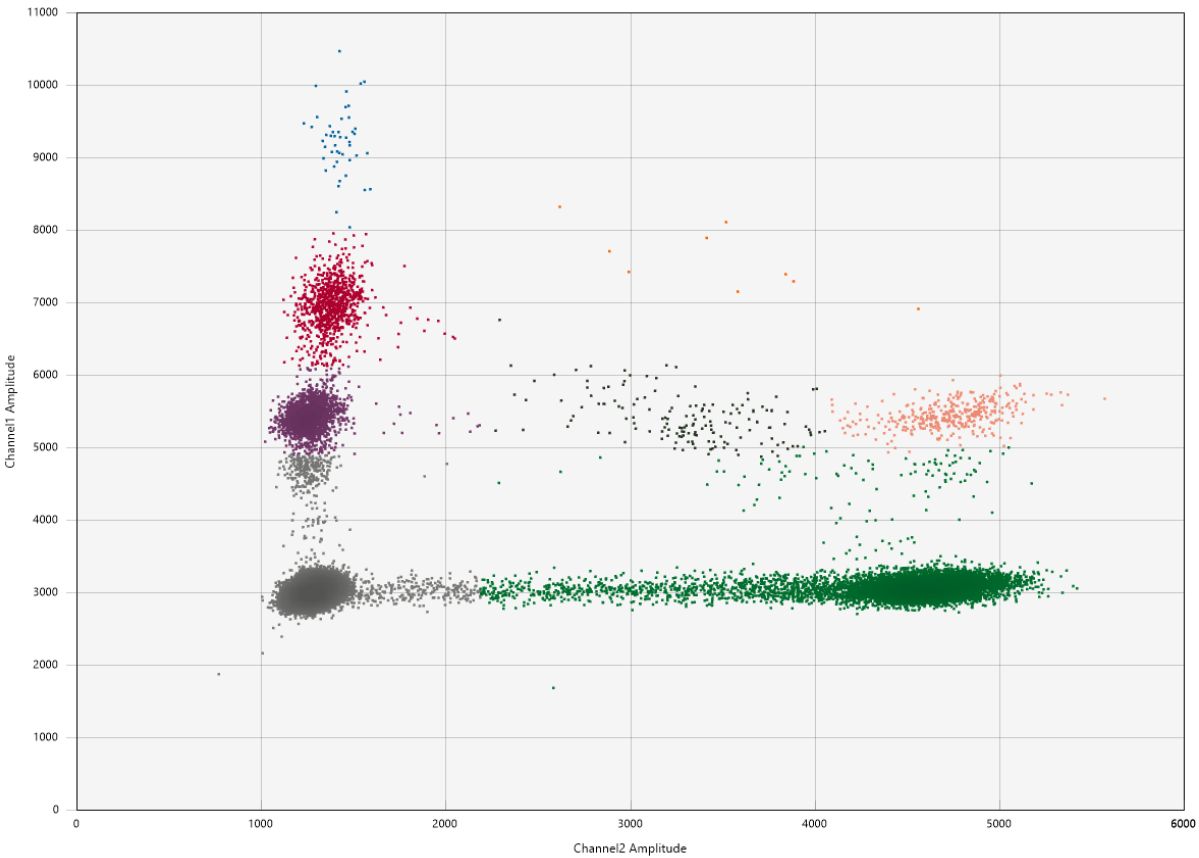

NK-Plasma

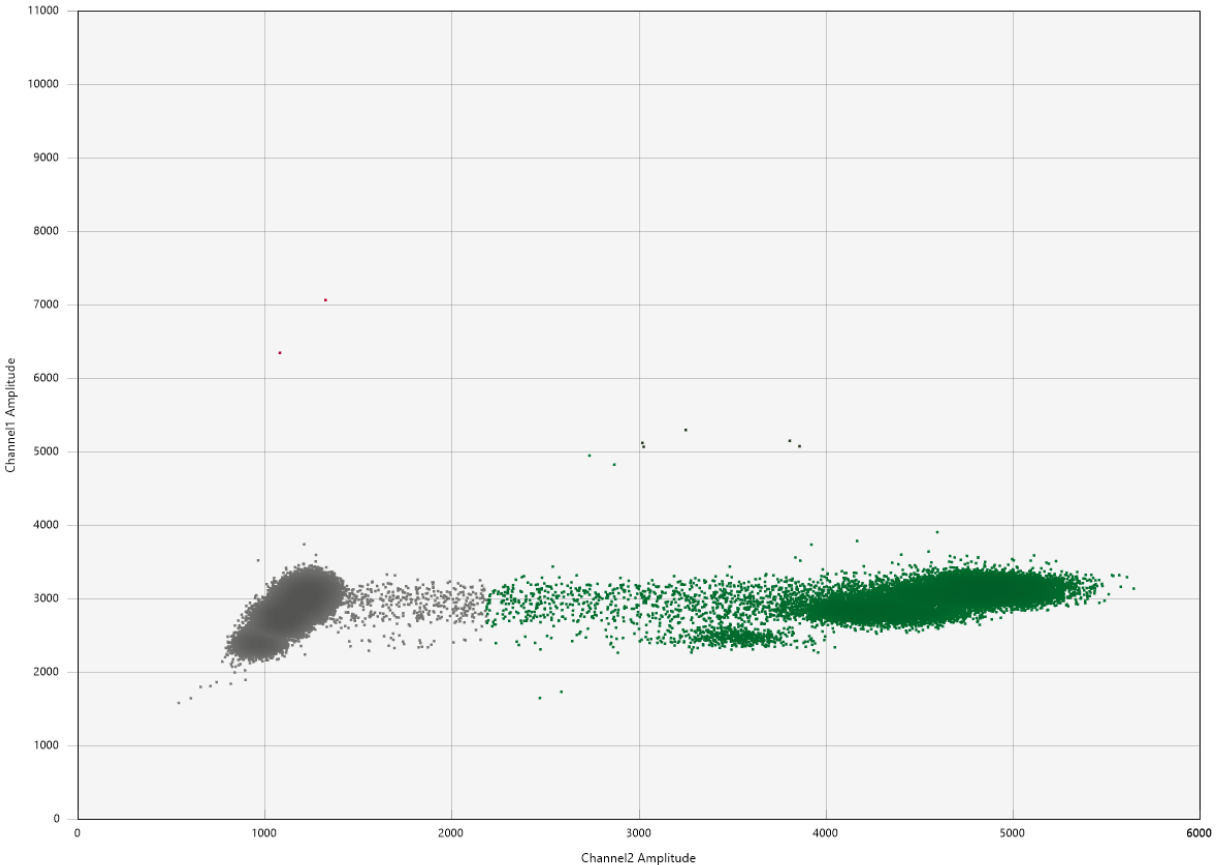

Pre-surgery

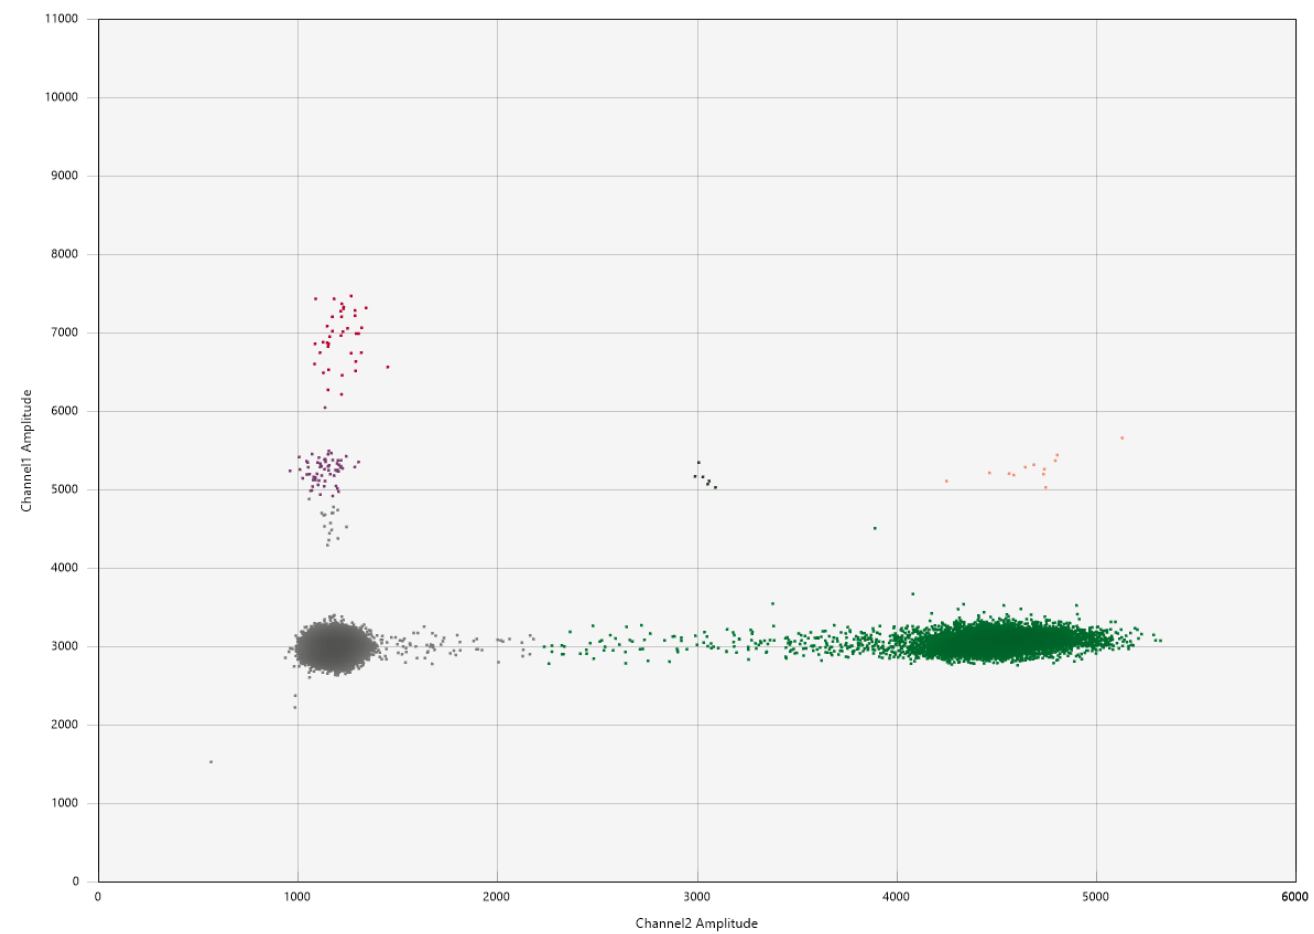

Follow up during chemo-1

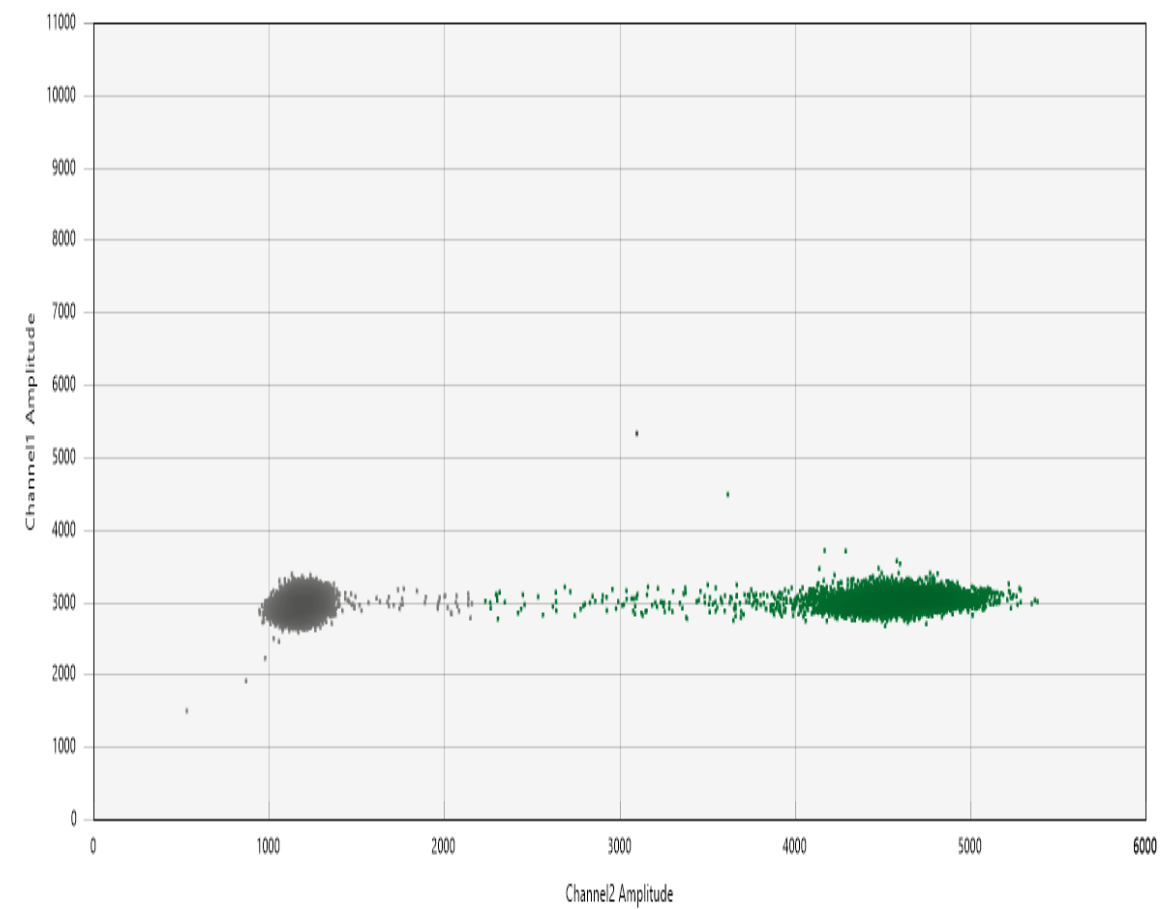

Follow up during chemo-2

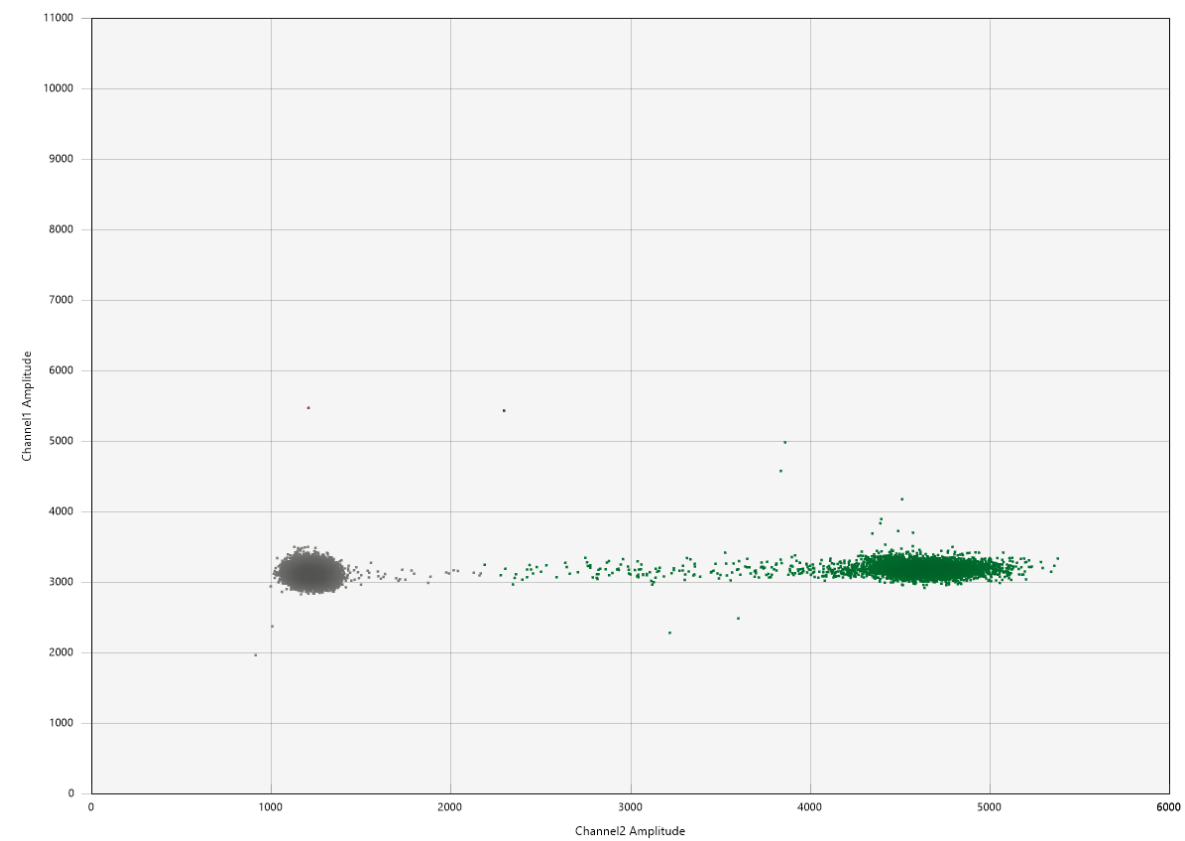

Follow up during chemo-3

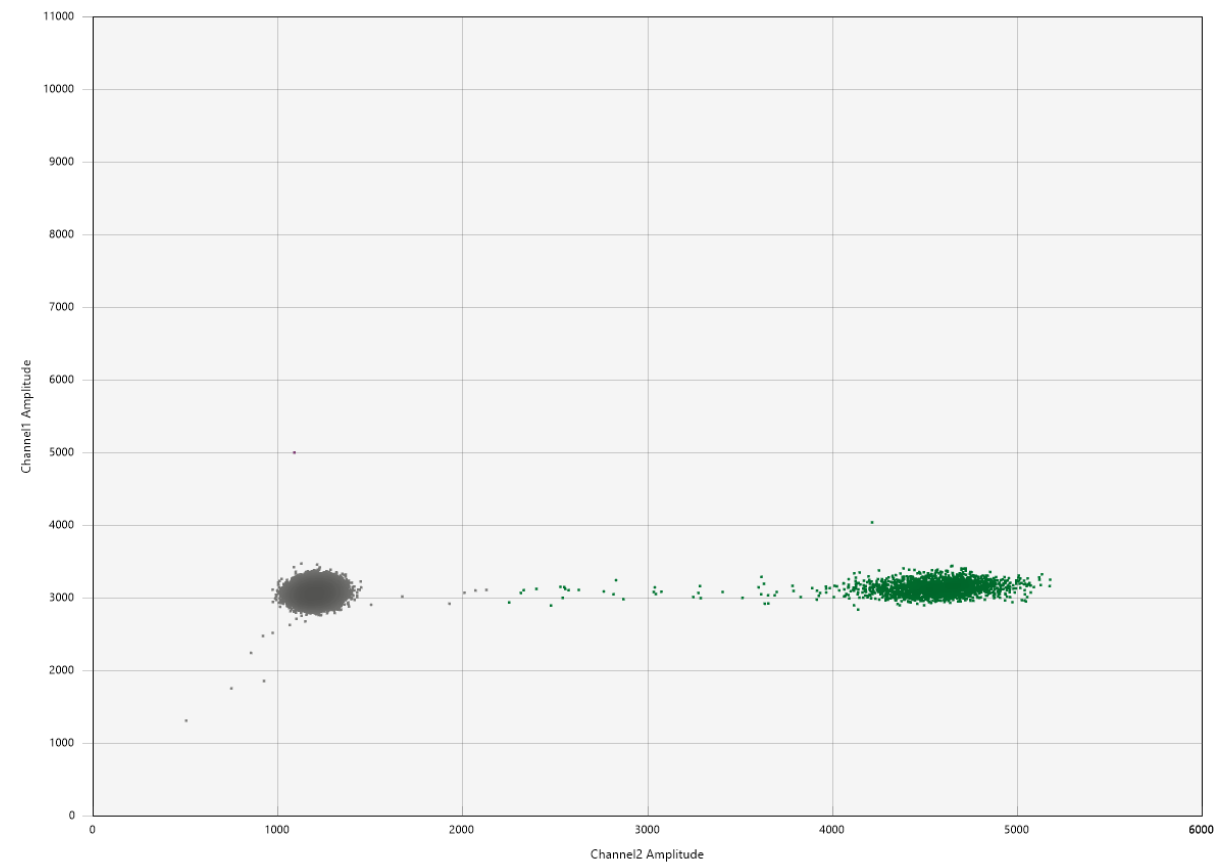

Follow up during chemo-4

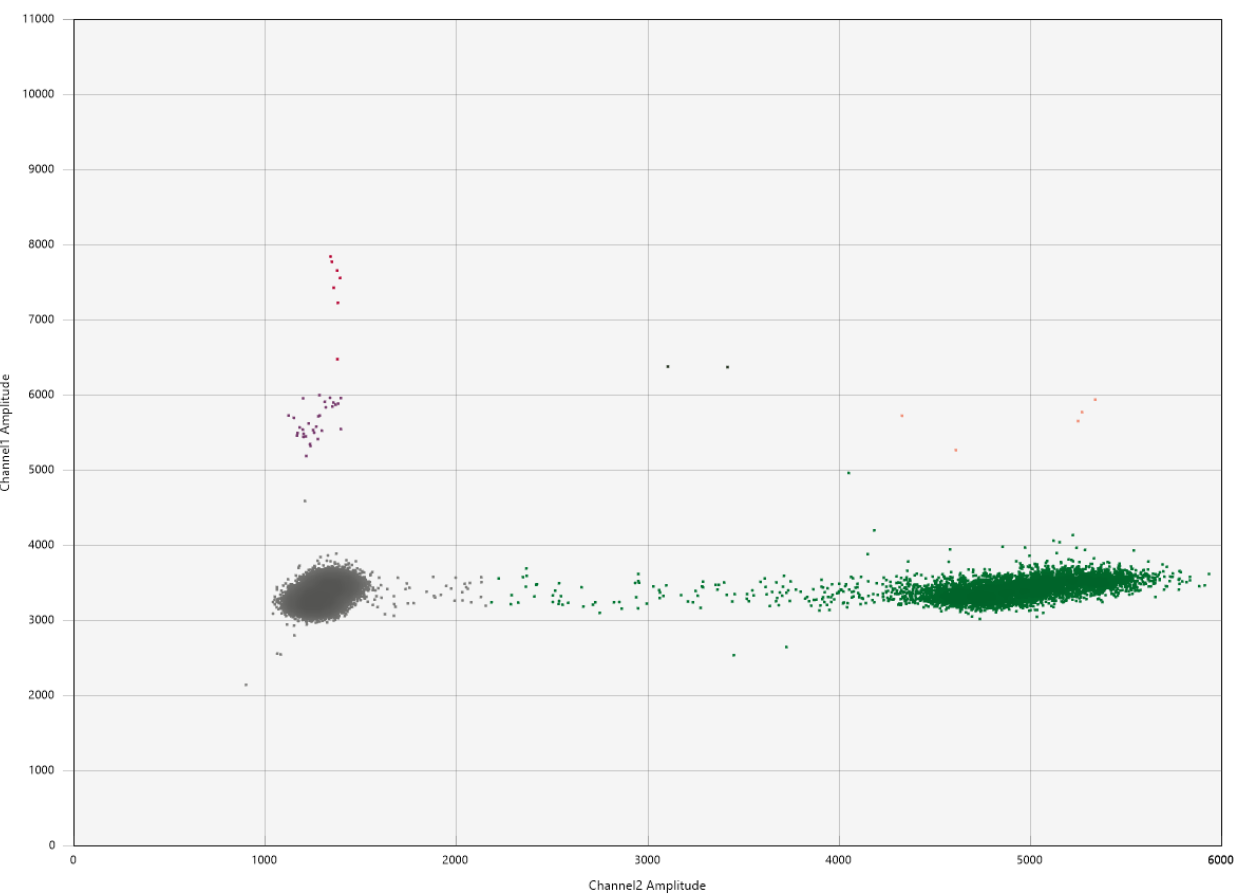

Post-surgery

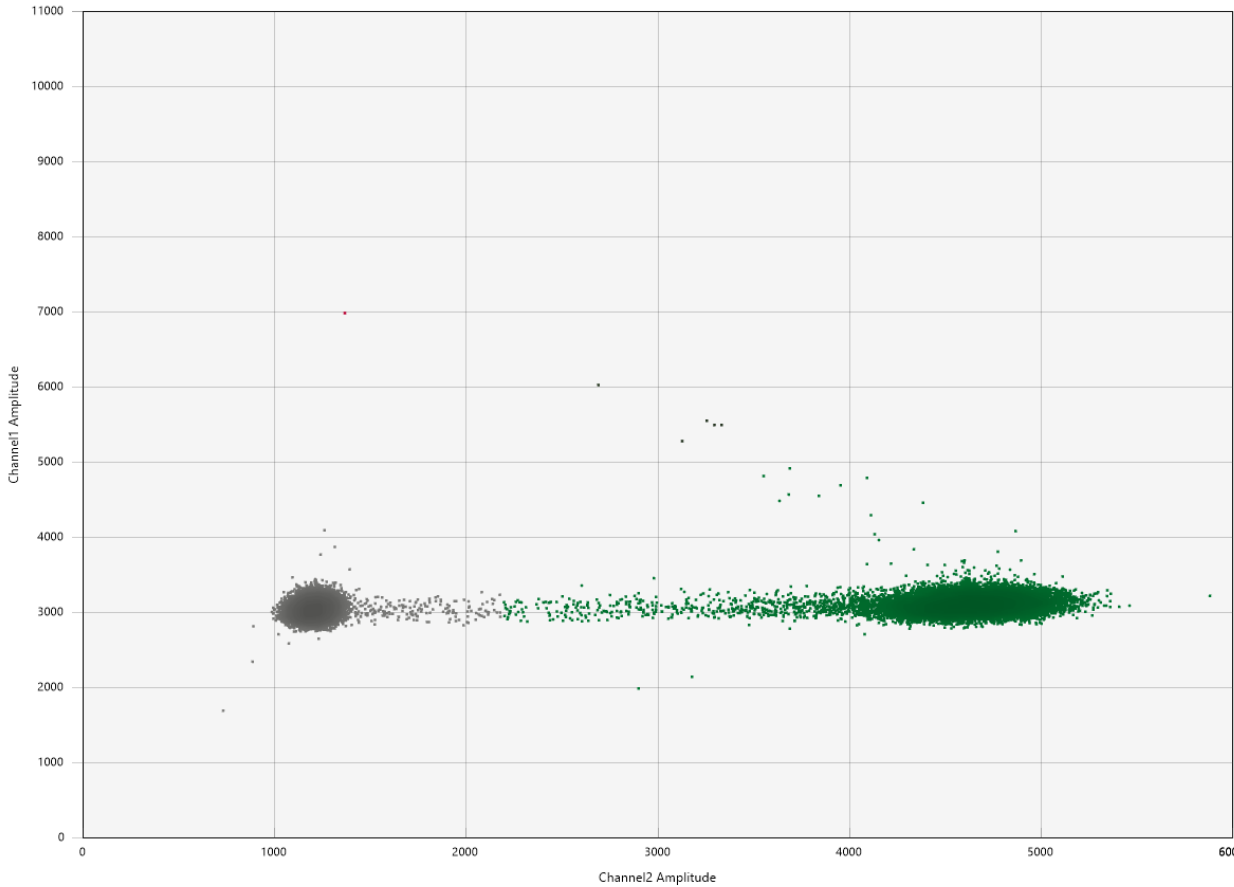

Concentration plots

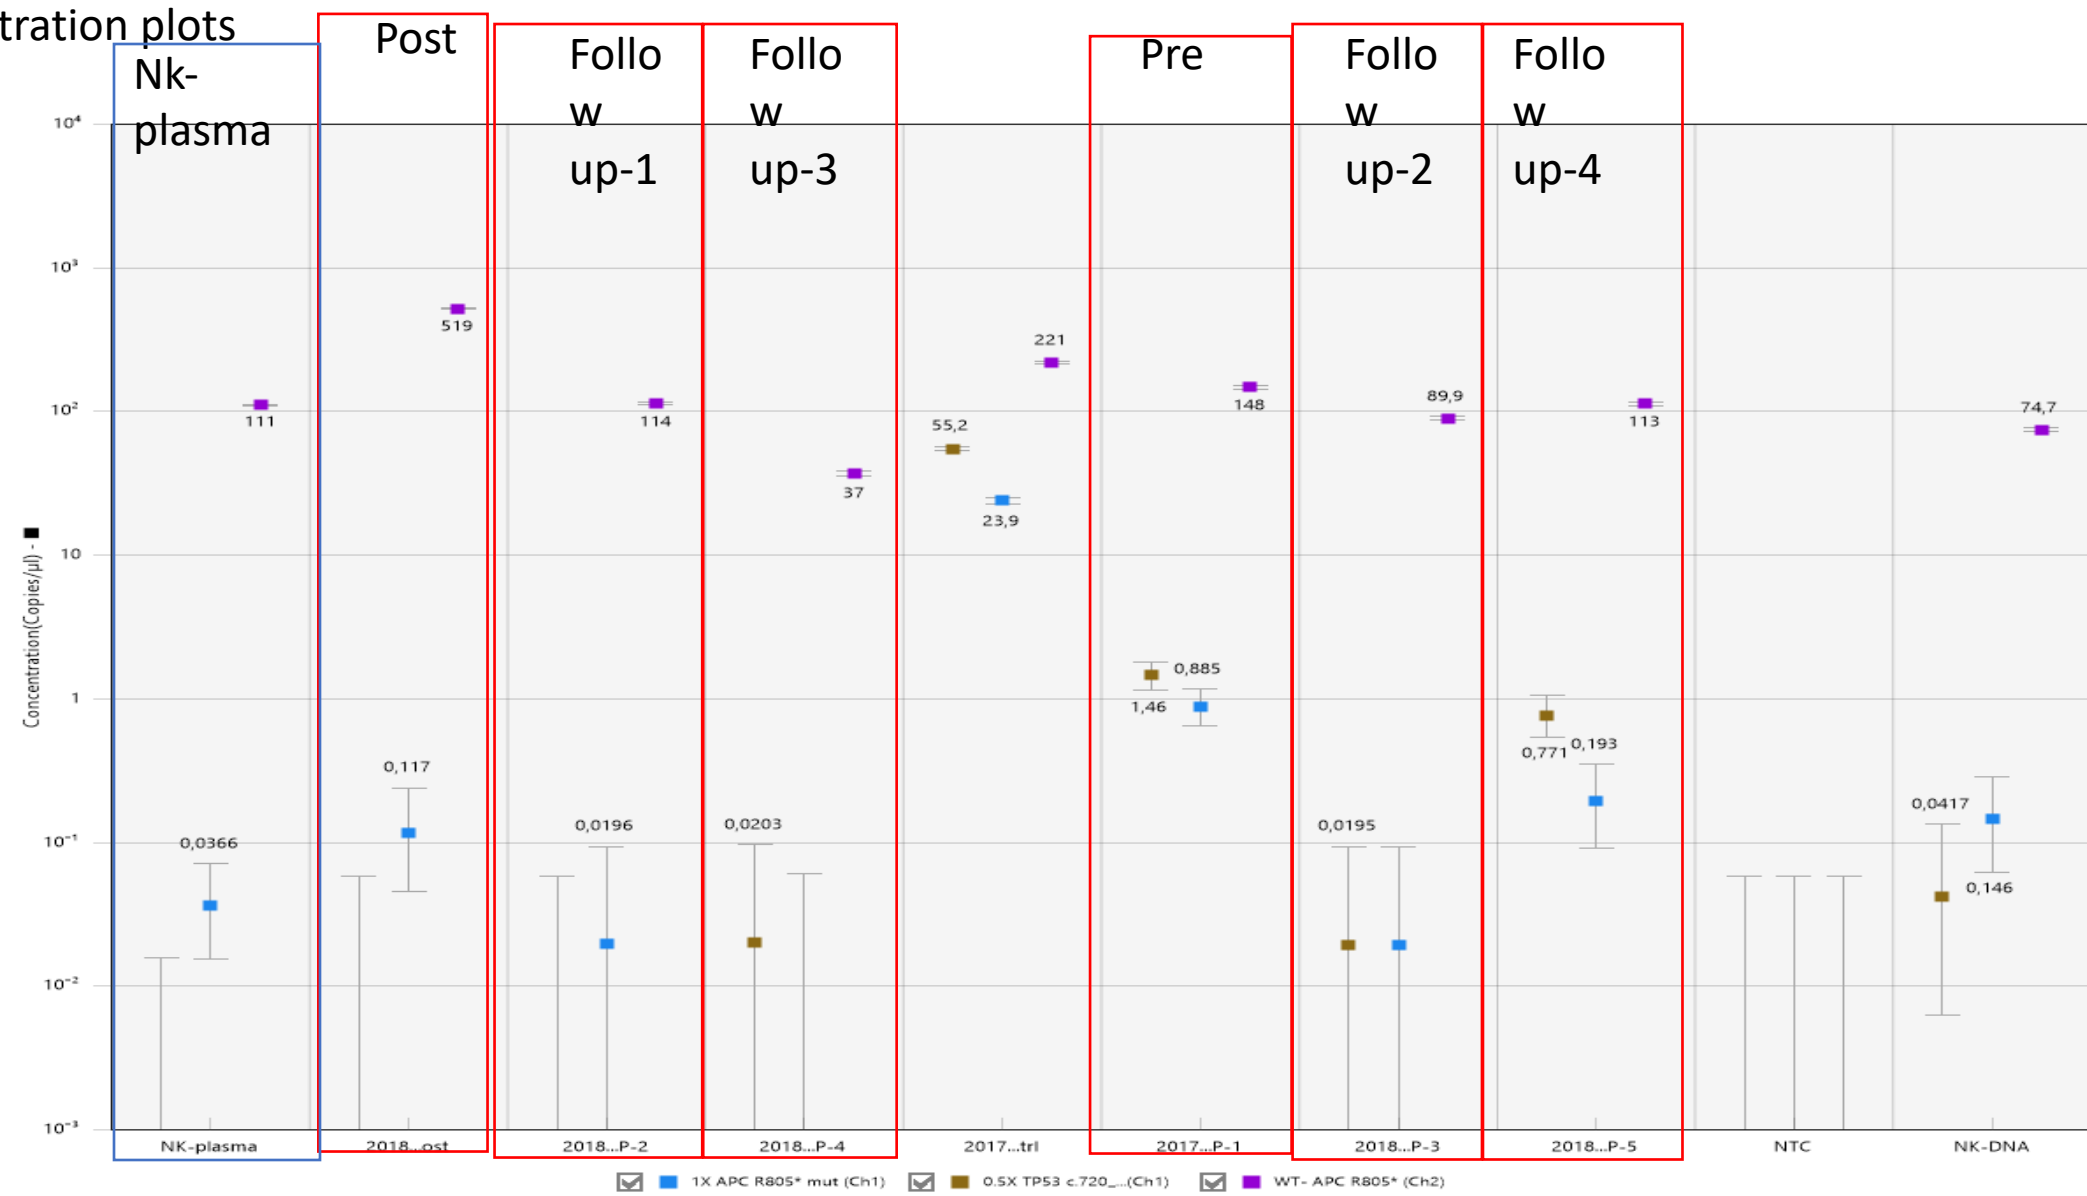

P41 - Final

Gene targets : RB1, p.R358\*, c.1072C>T and TP53,p.R273C, c.817C>T

Assays: 0.5X TP53,p.R273C mut (FAM) and 1X dark probe for TP53,p.R273C

1X RB1, p.R358\* mut (FAM) and 1X RB1 WT, p.R358\* (HEX)

1X RB1,  
p.R358\*  
mut

0.5X TP53  
,p.R273C  
mut

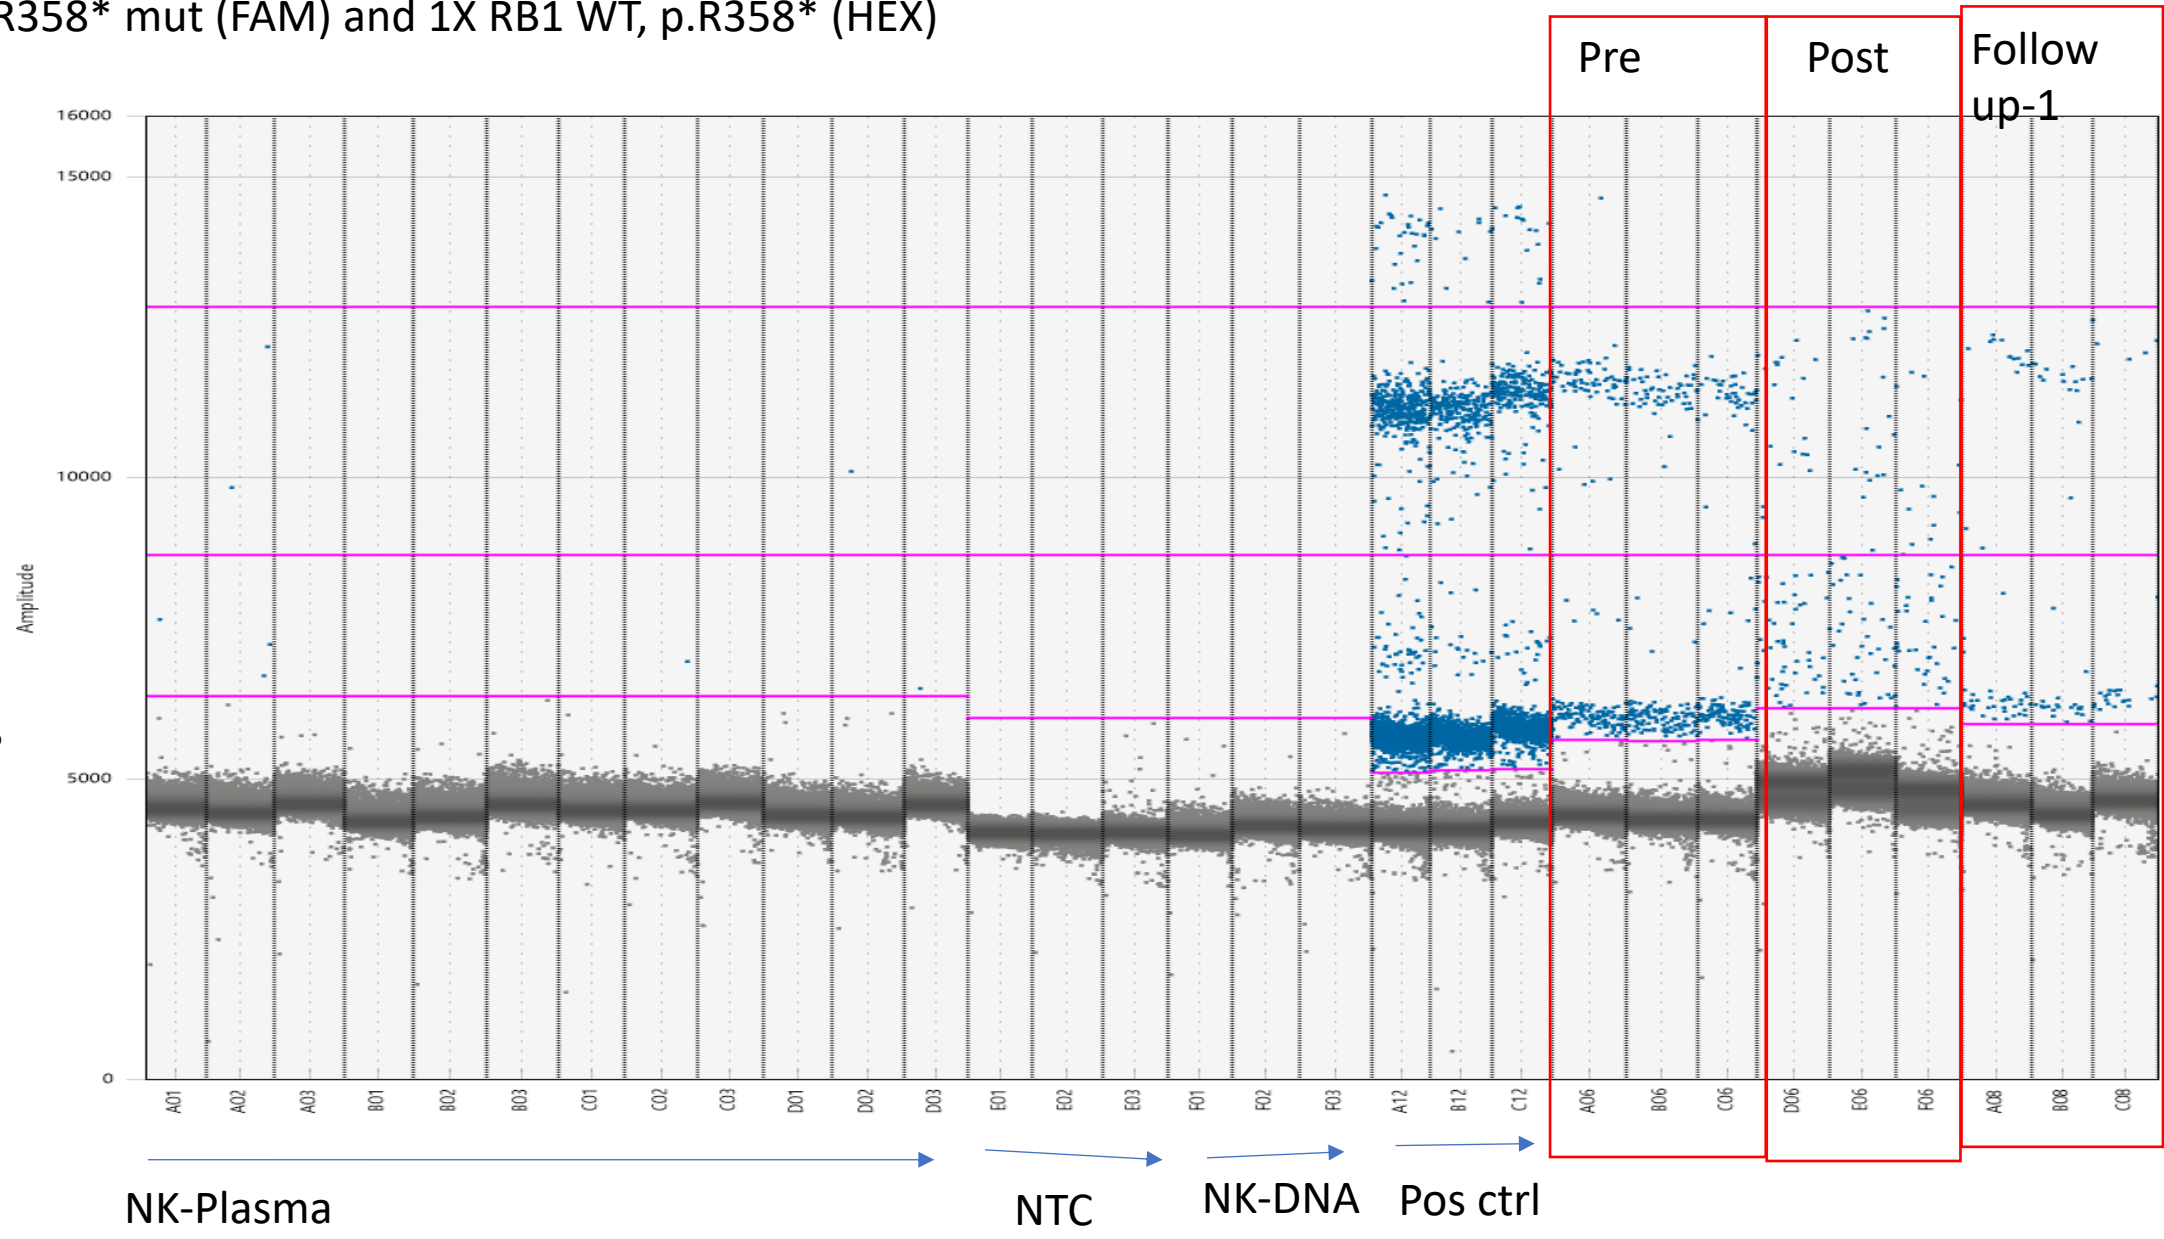

P41 - Final WT  
Gene targets : RB1, p.R358\*, c.1072C>T and TP53,p.R273C, c.817C>T  
Assays: 1X dark probe for TP53,p.R273C and 1X RB1 WT, p.R358\* (HEX)

1X RB1  
WT,  
p.R358\*

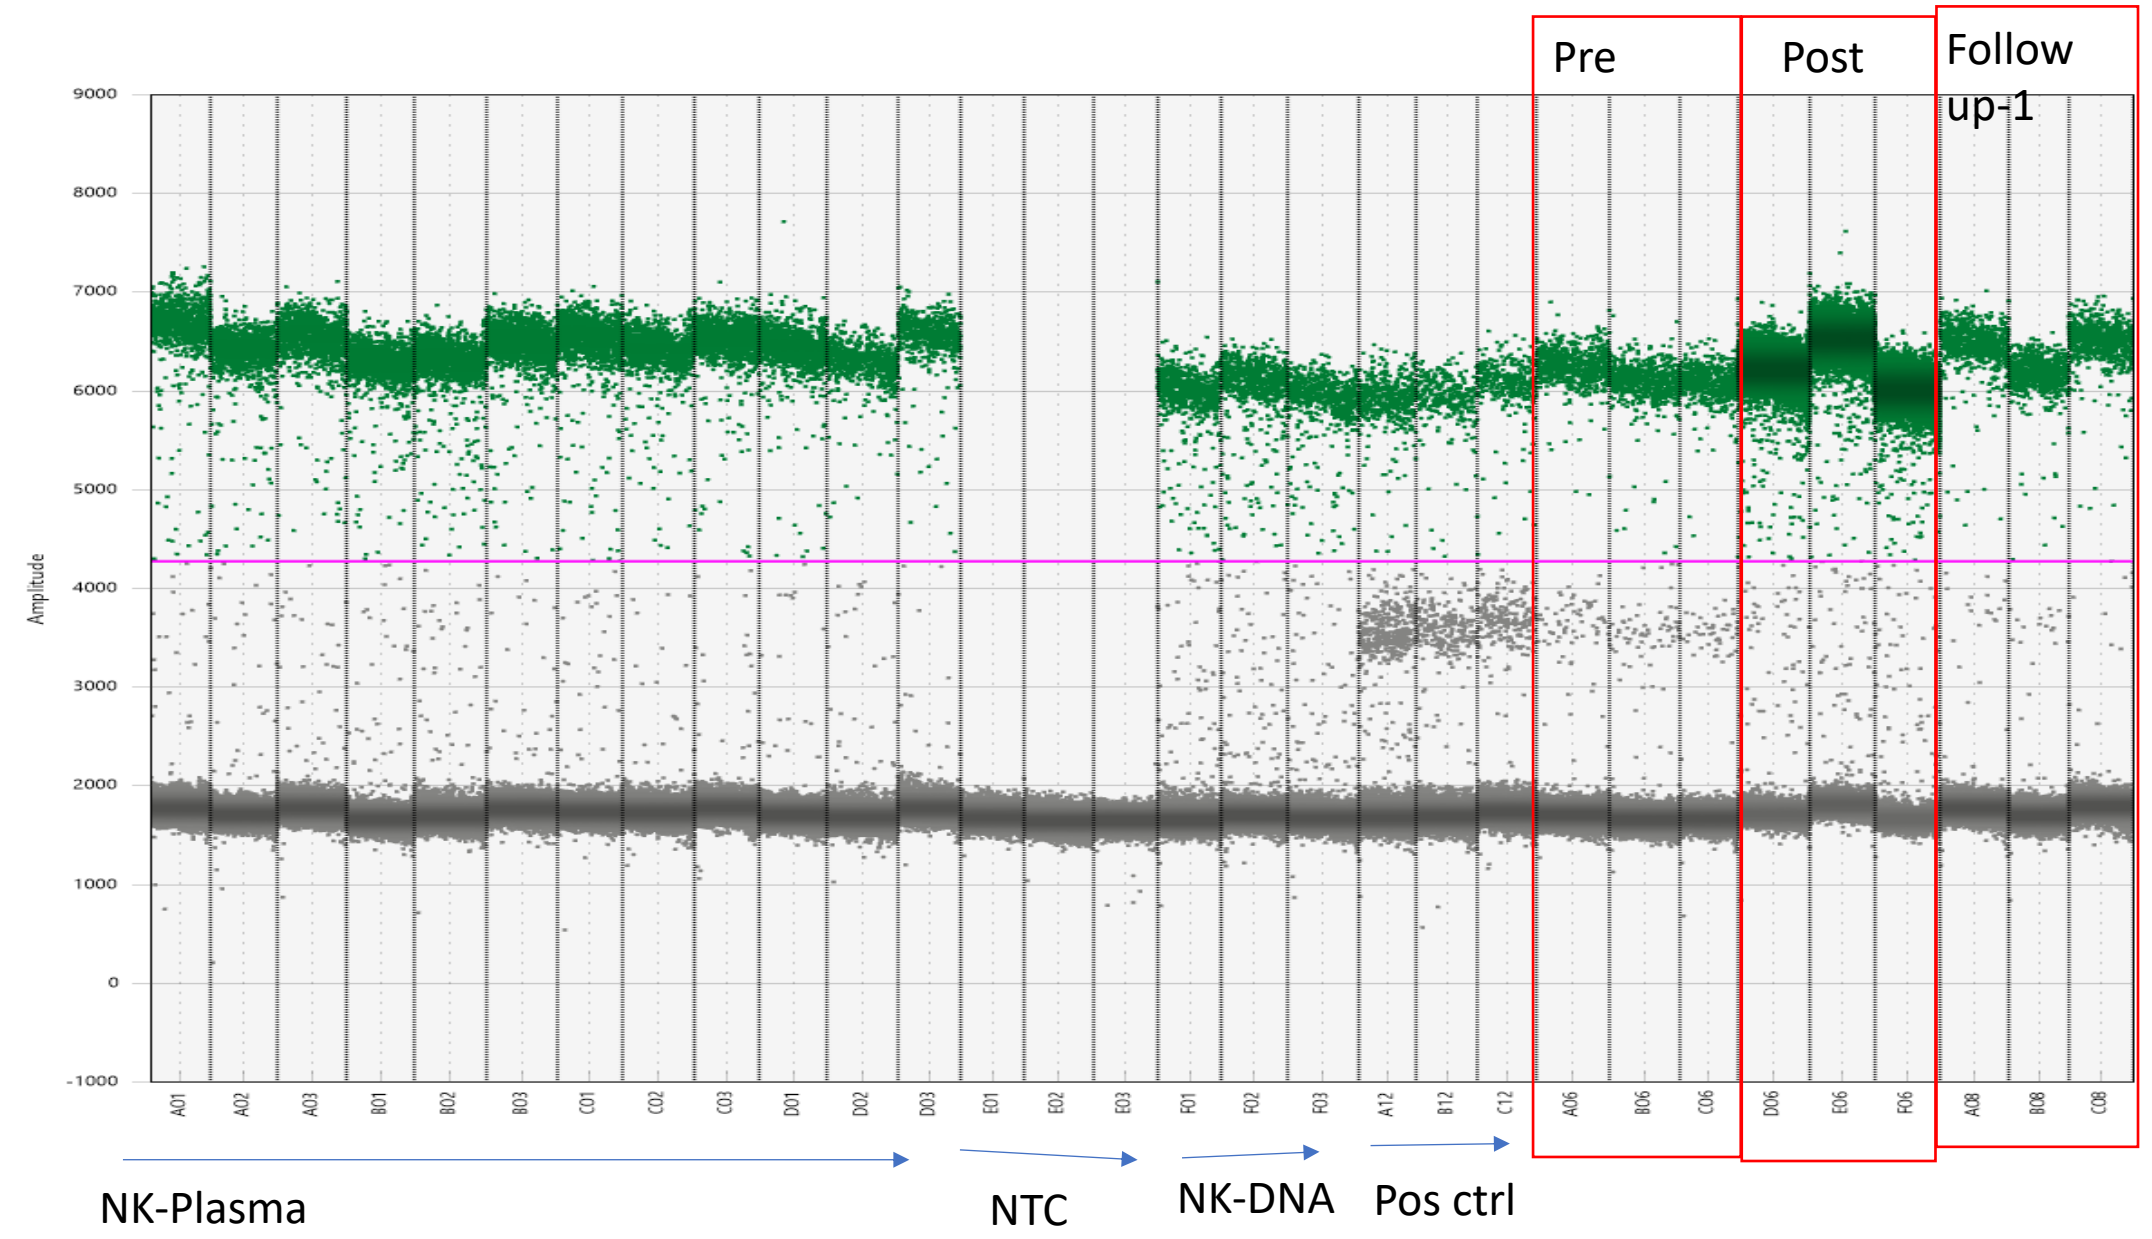

P41 - Final dil

Gene targets : RB1, p.R358\*, c.1072C>T and TP53,p.R273C, c.817C>T

Assays: 0.5X TP53,p.R273C mut (FAM) and 1X dark probe for TP53,p.R273C  
1X RB1, p.R358\* mut (FAM) and 1X RB1 WT, p.R358\* (HEX)

1X RB1,  
p.R358\*  
mut

0.5X TP53  
,p.R273C  
mut

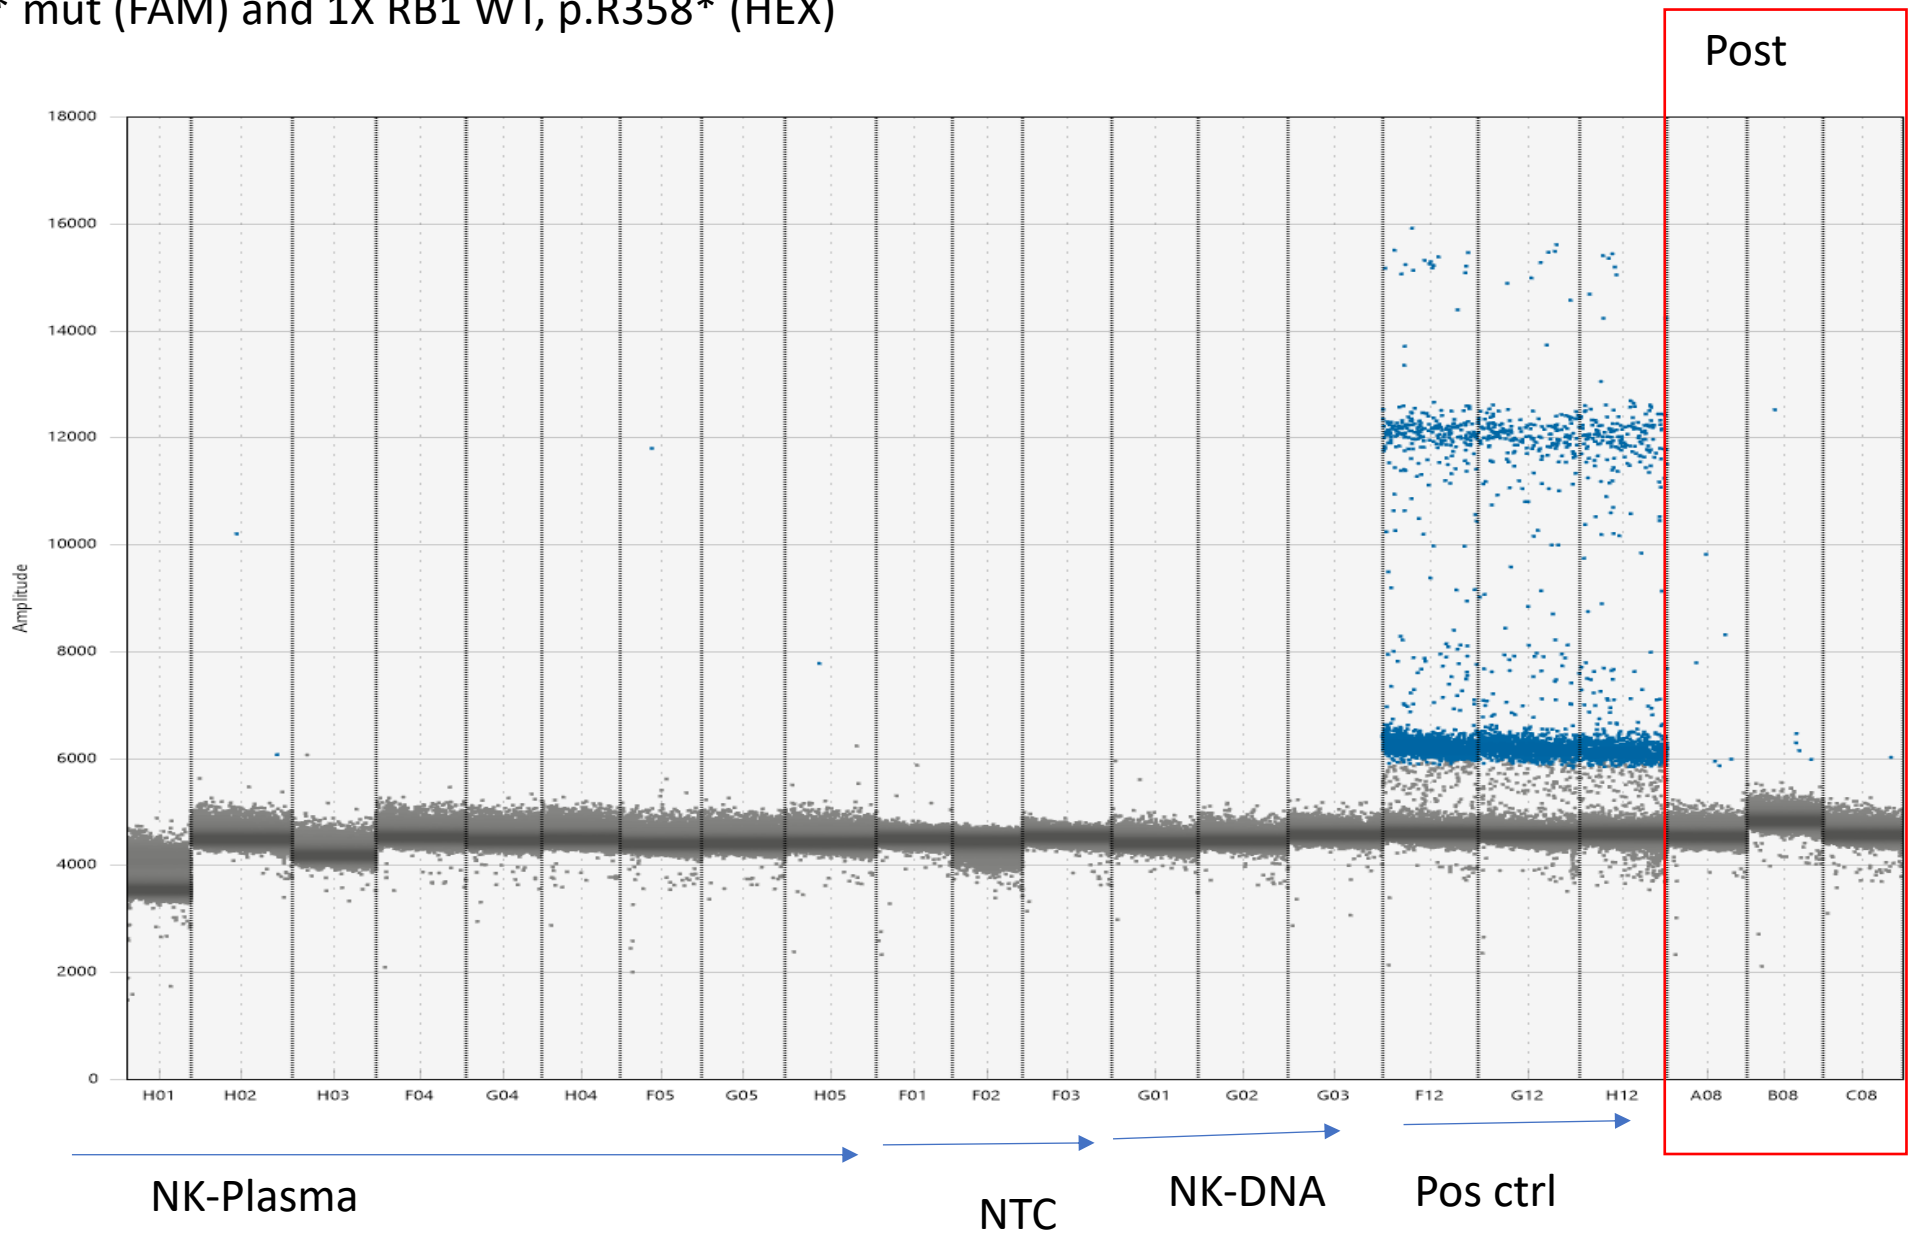

P41 - Final dil -WT  
Gene targets : RB1, p.R358\*, c.1072C>T and TP53,p.R273C, c.817C>T  
Assays: 1X dark probe for TP53,p.R273C and 1X RB1 WT, p.R358\* (HEX)

1X RB1  
WT,  
p.R358\*

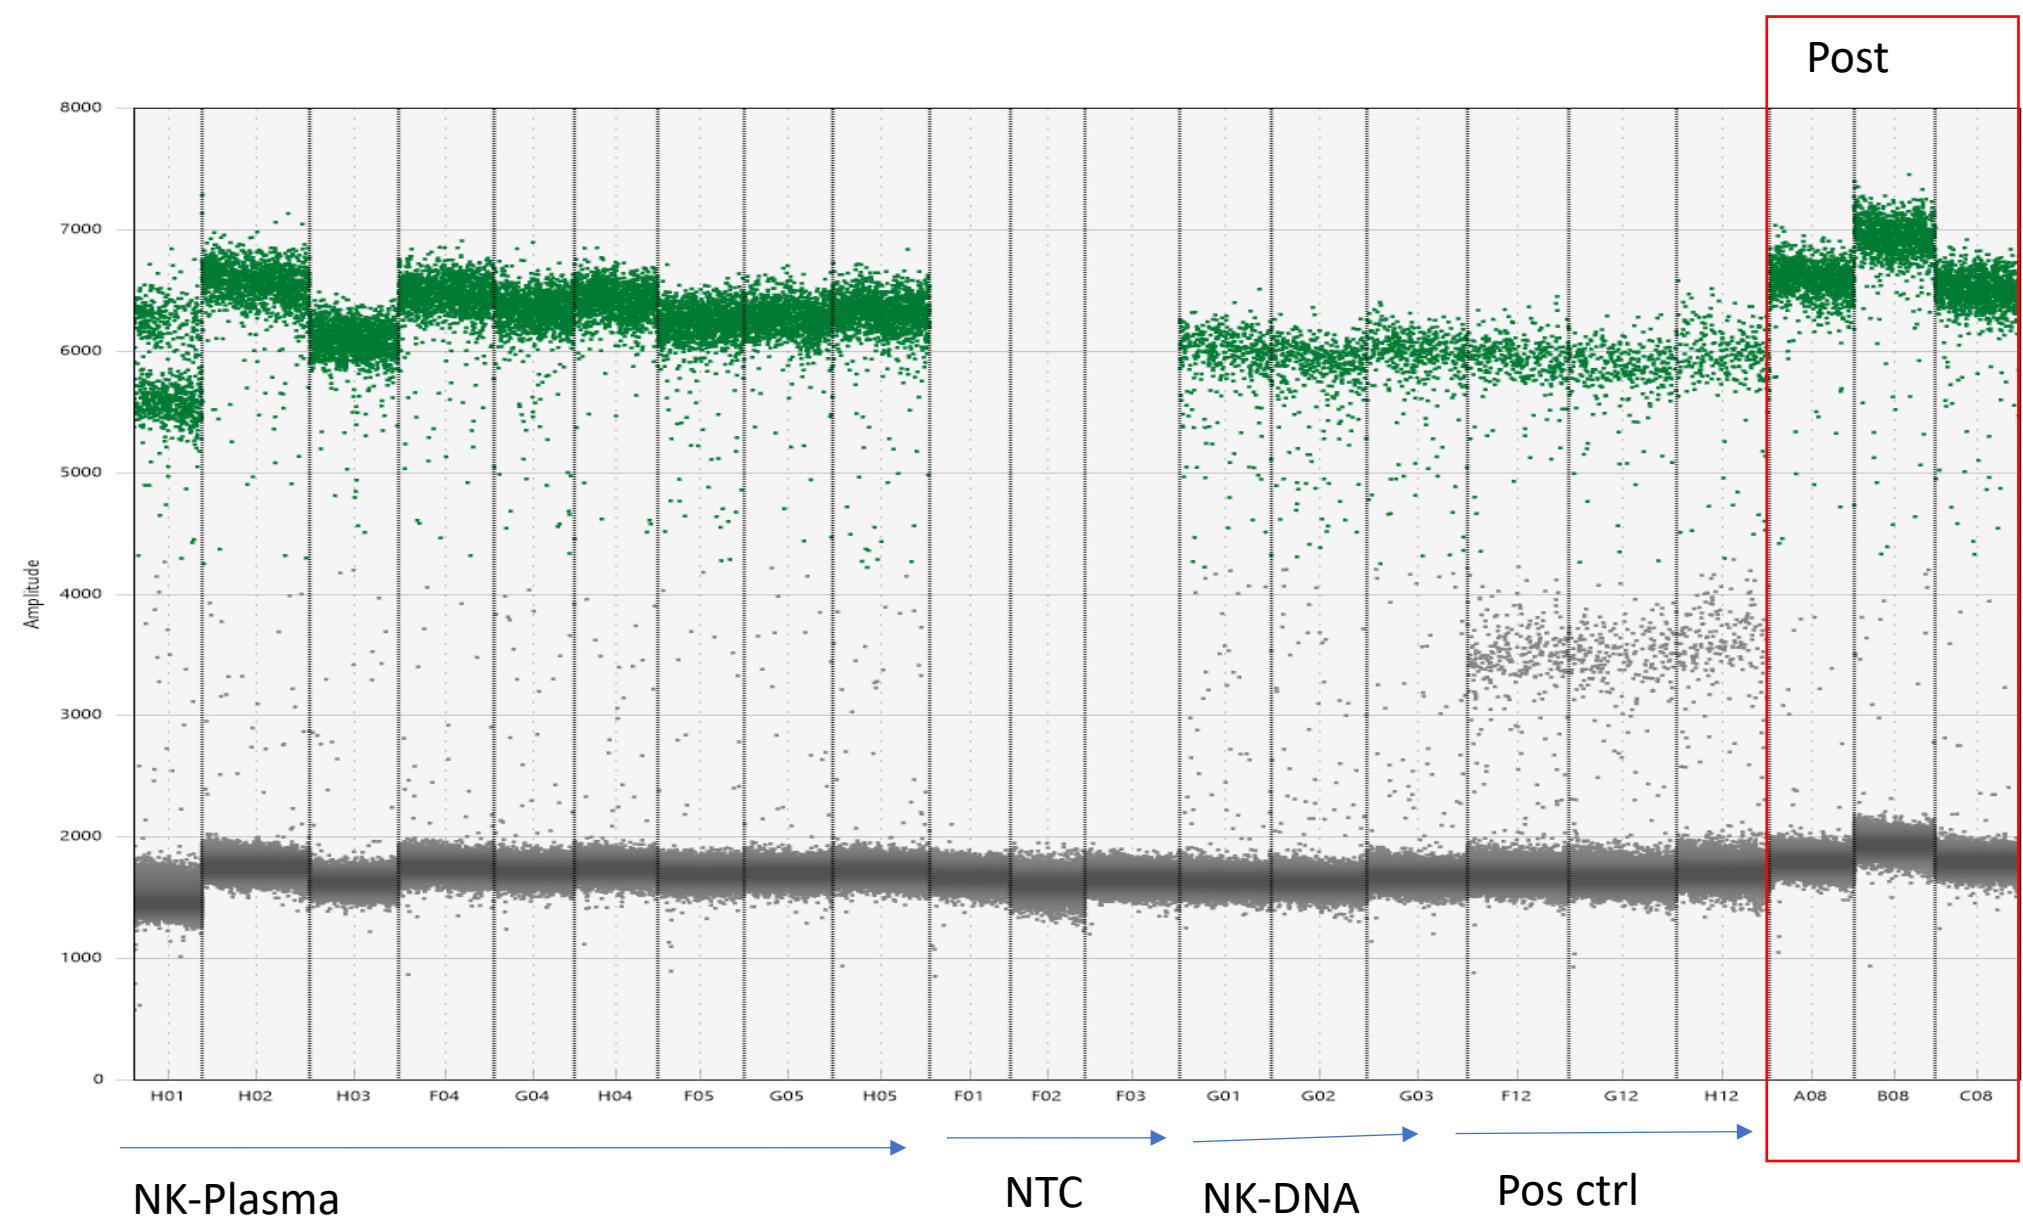

Positive control

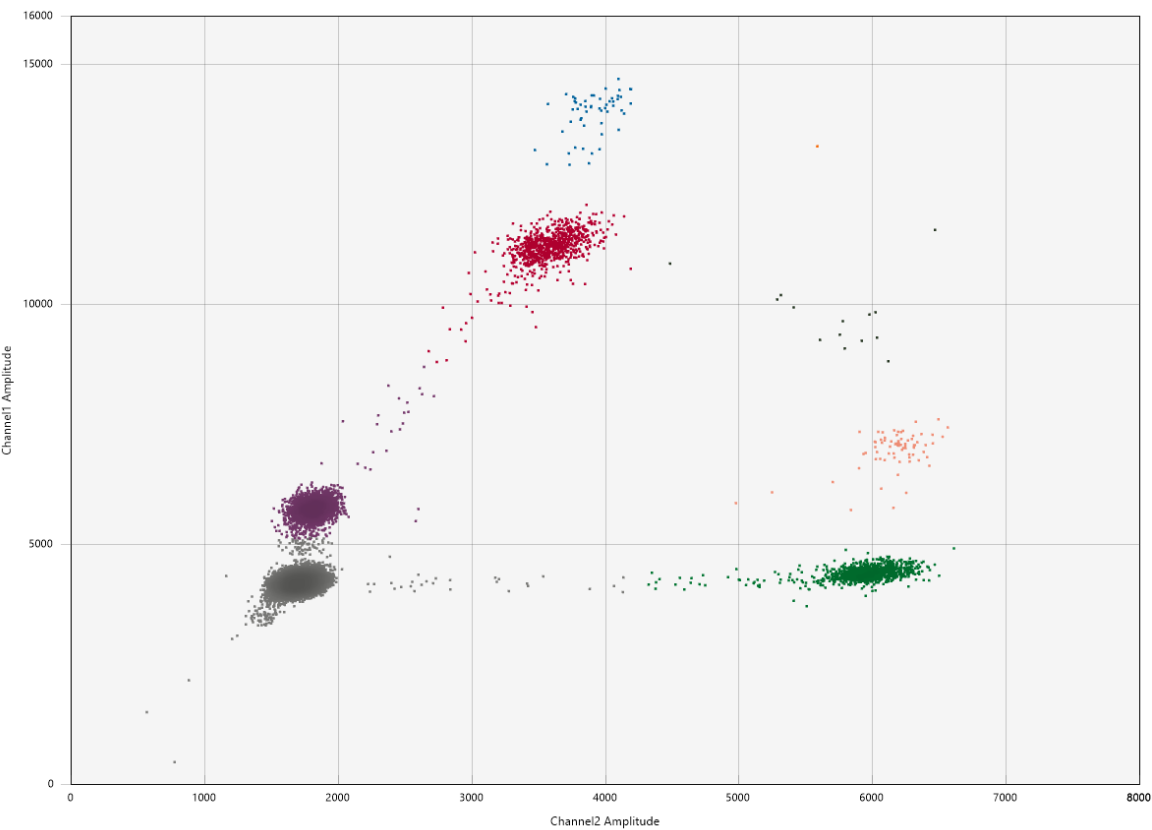

NK-Plasma

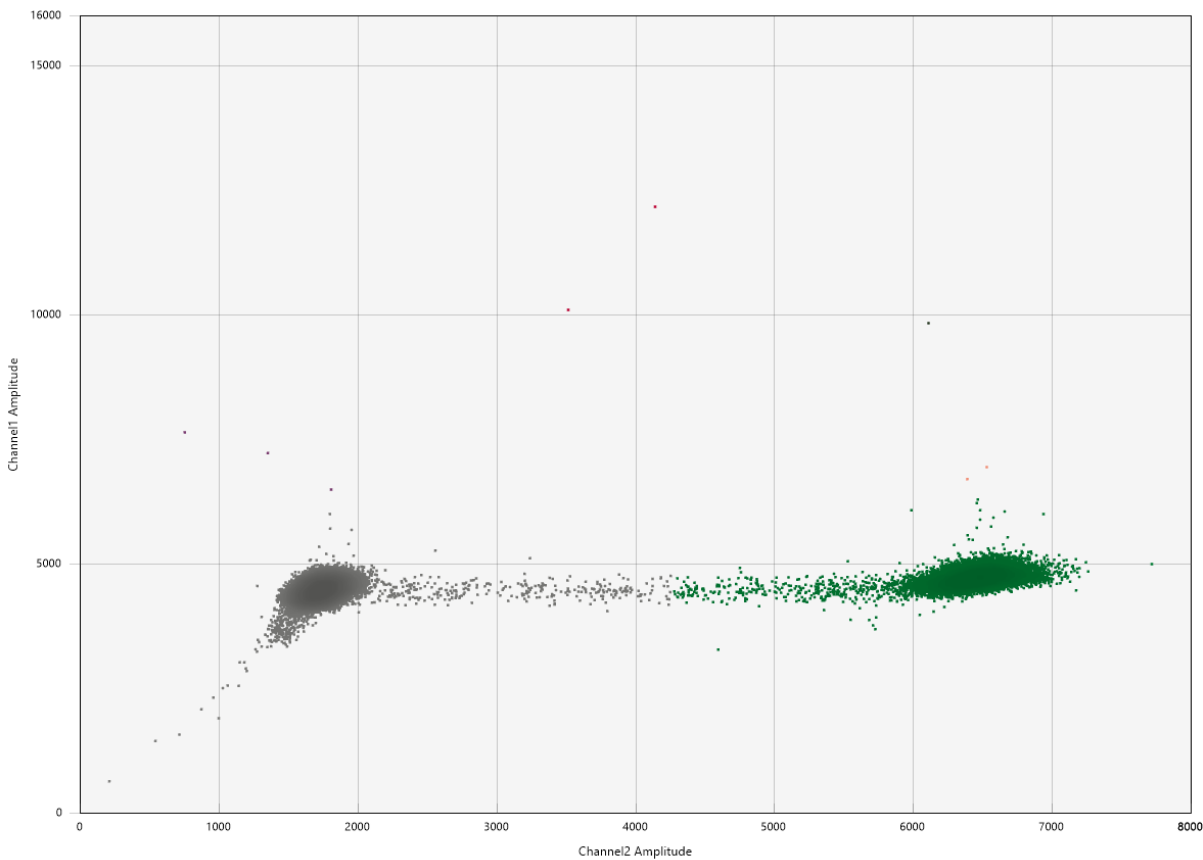

Pre-surgery

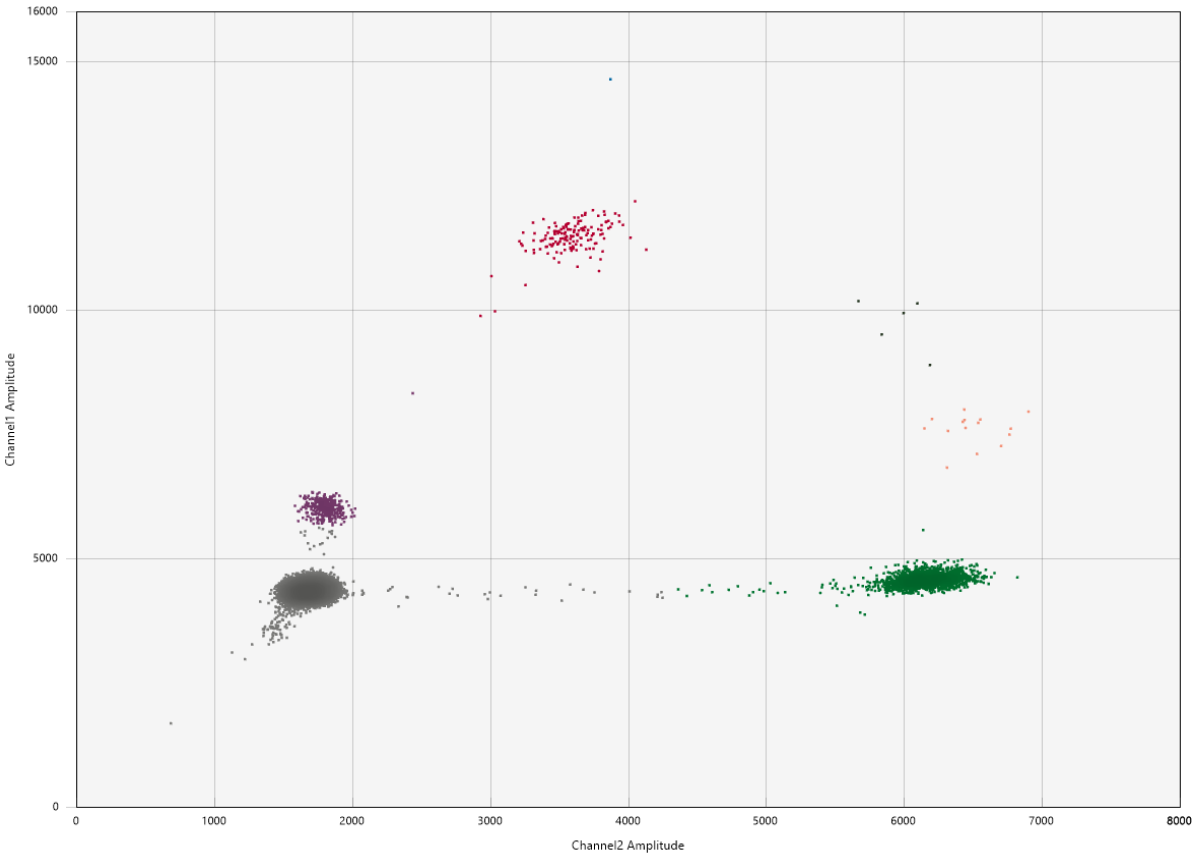

Follow-up 1

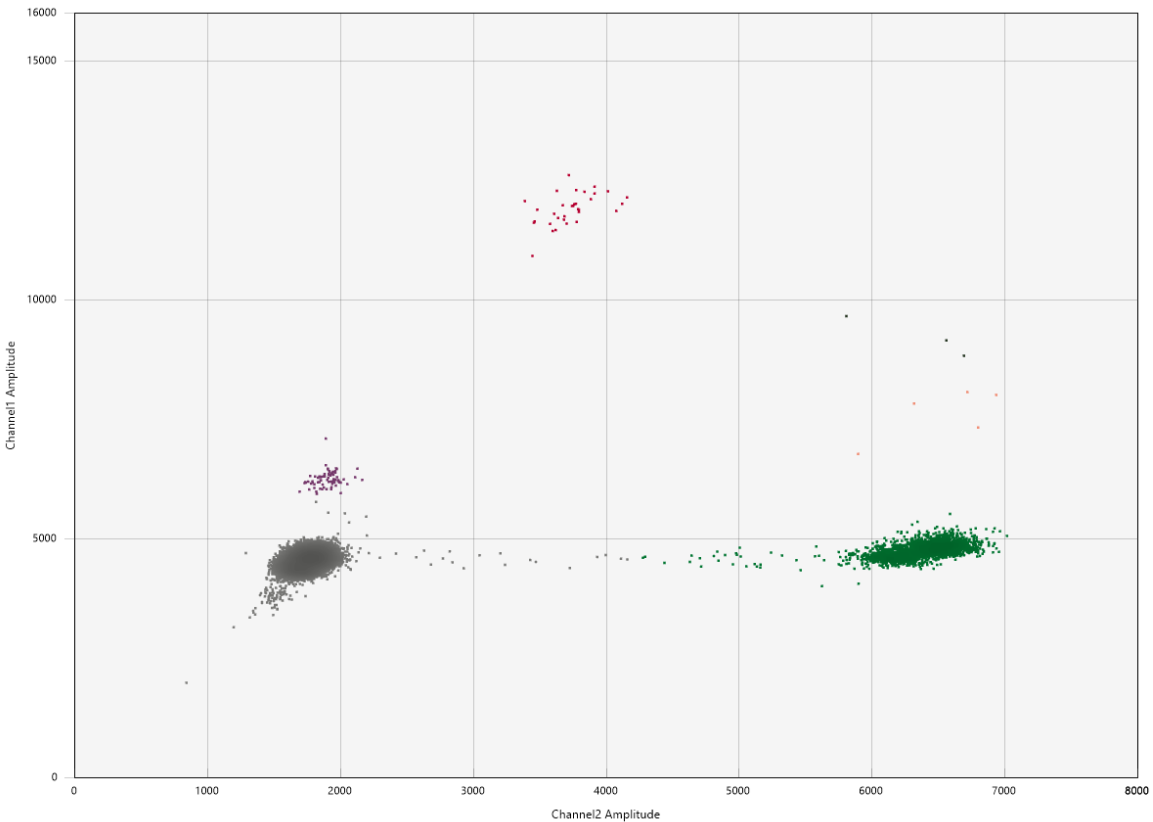

Post-surgery

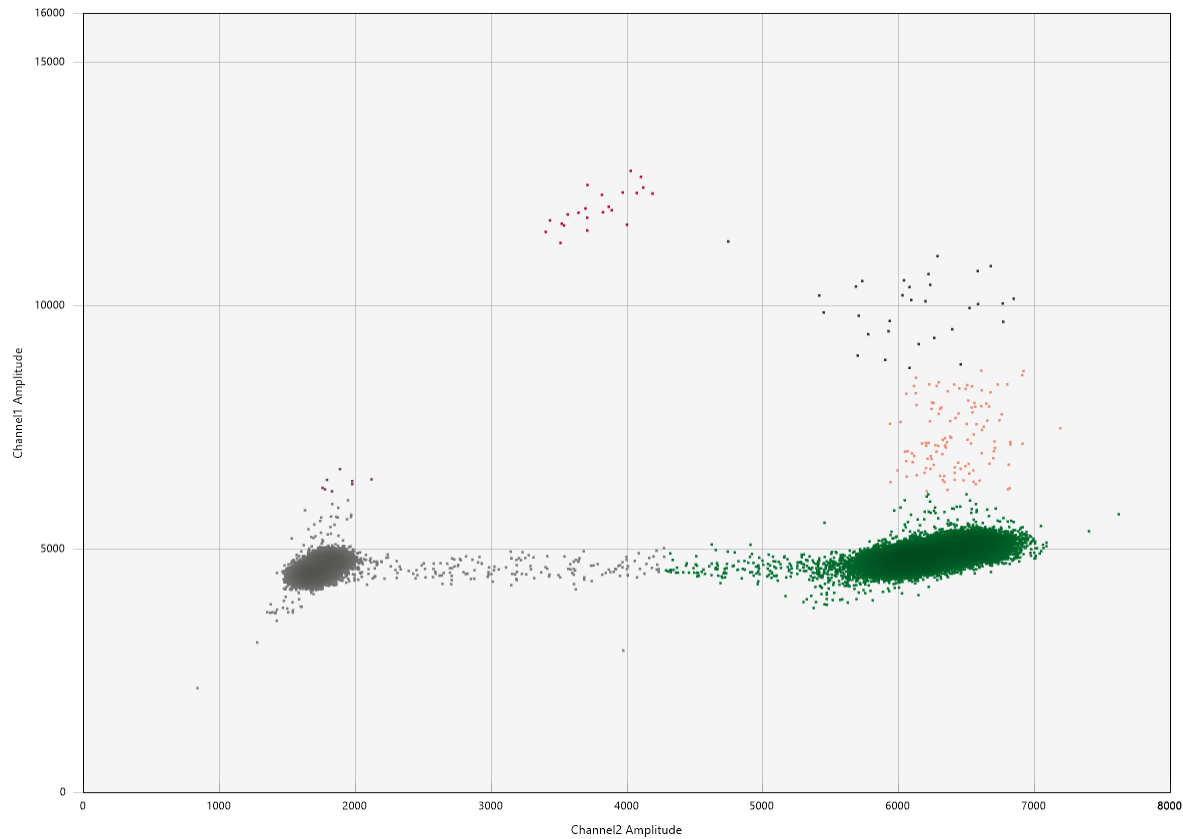

Post-surgery diluted

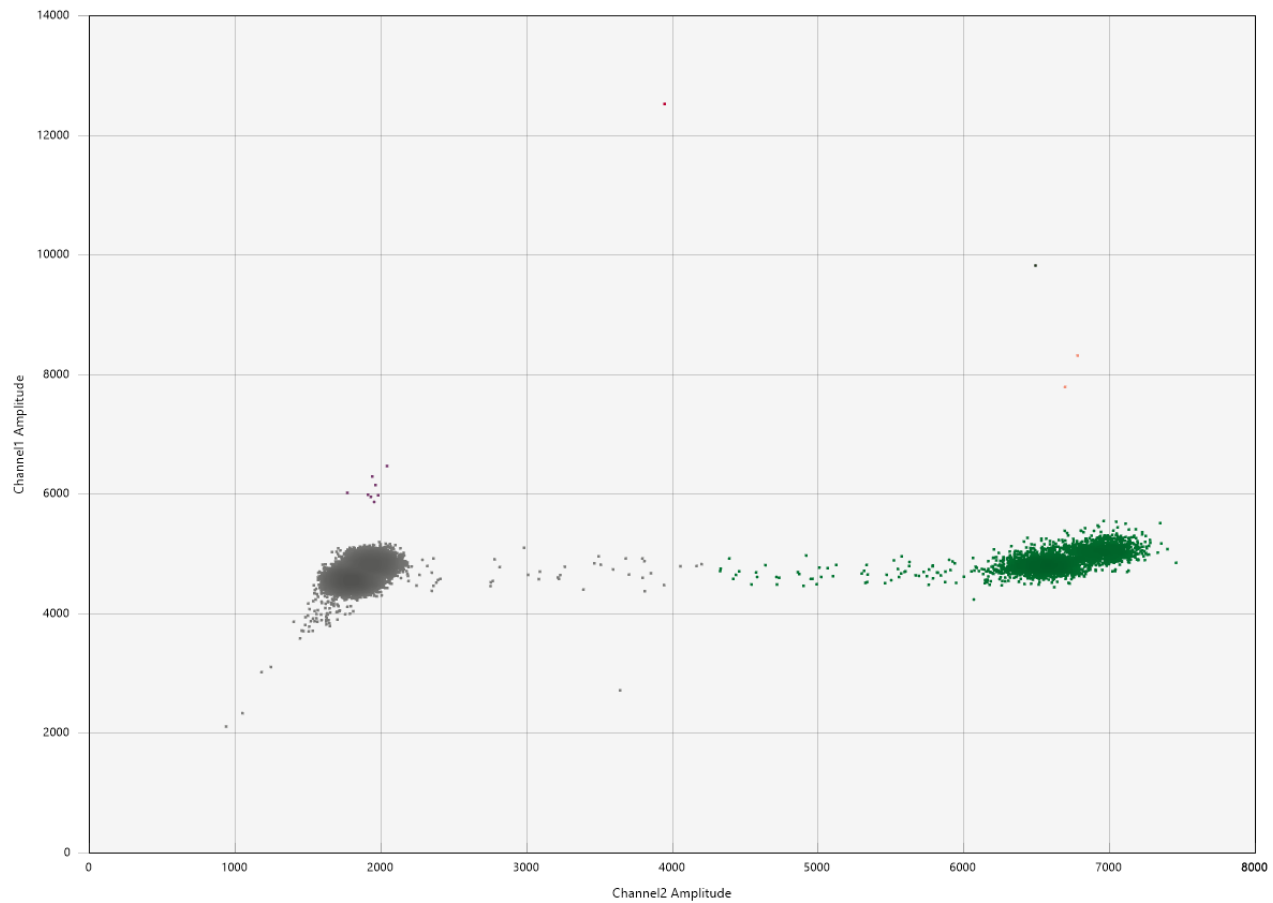

# Concentration plots

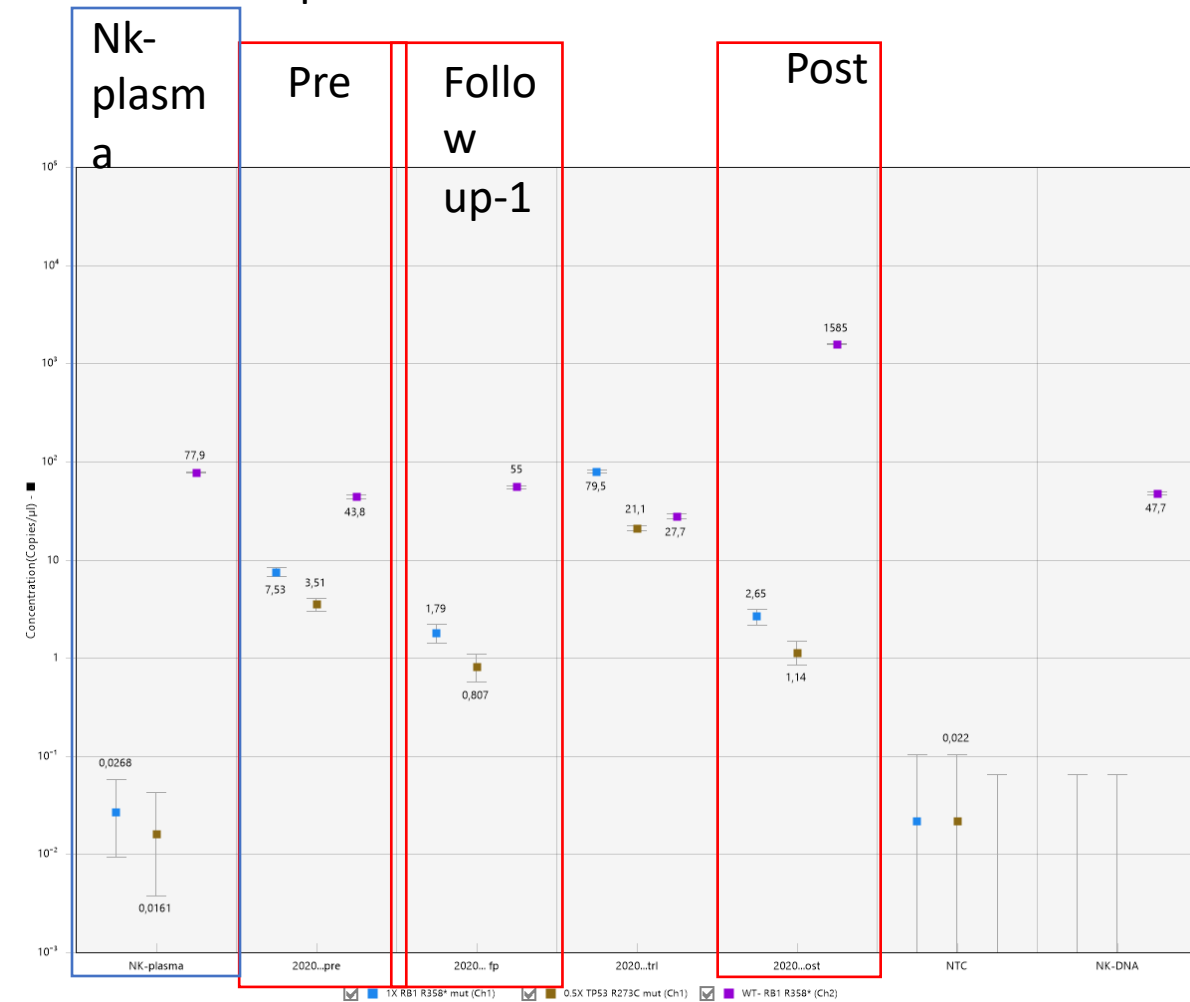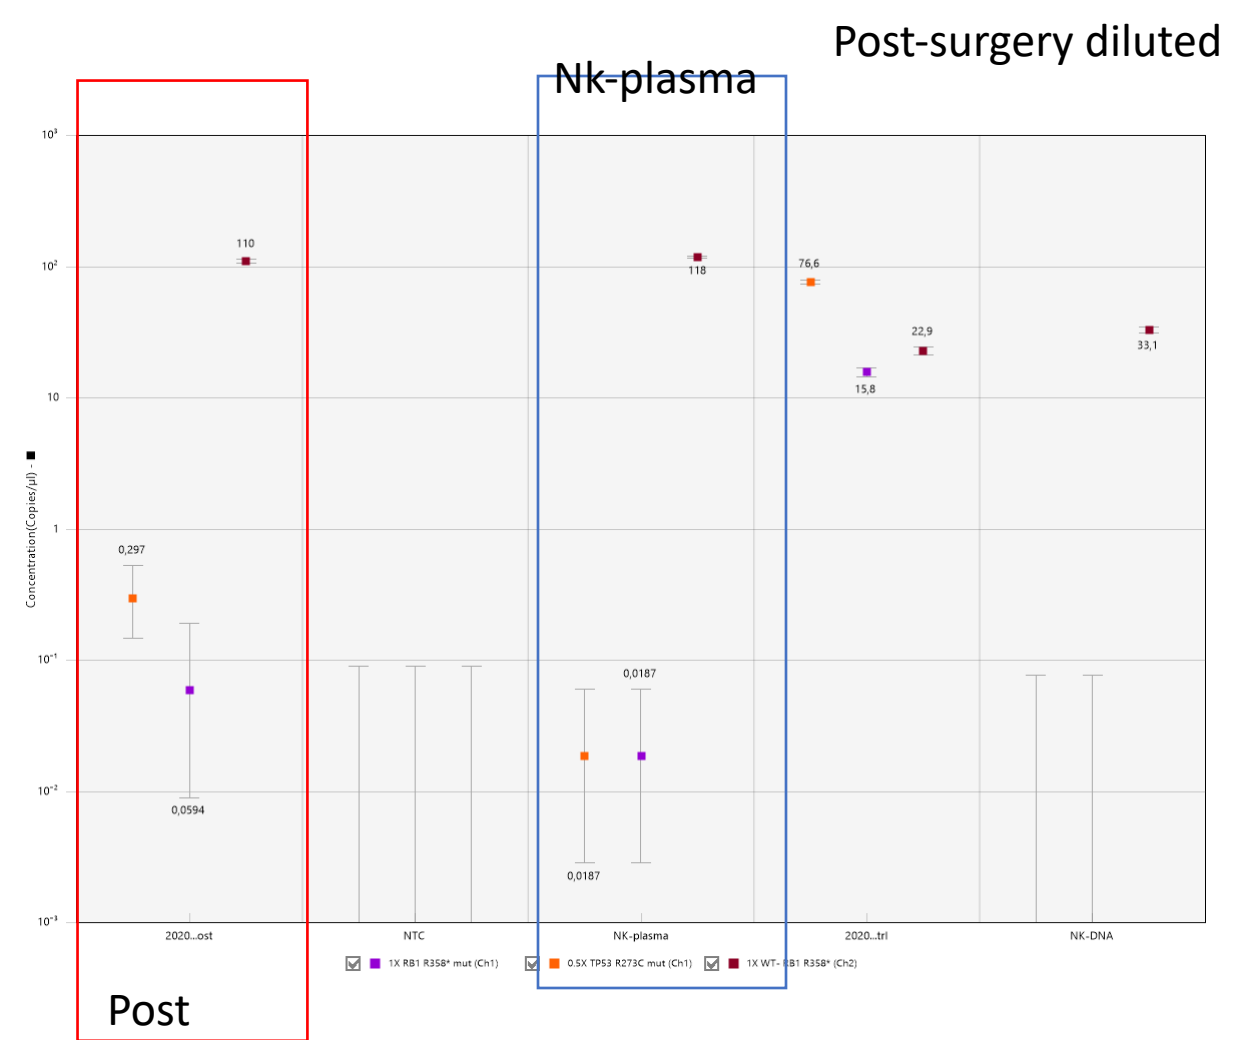

1X TP53,p.R196\*mut

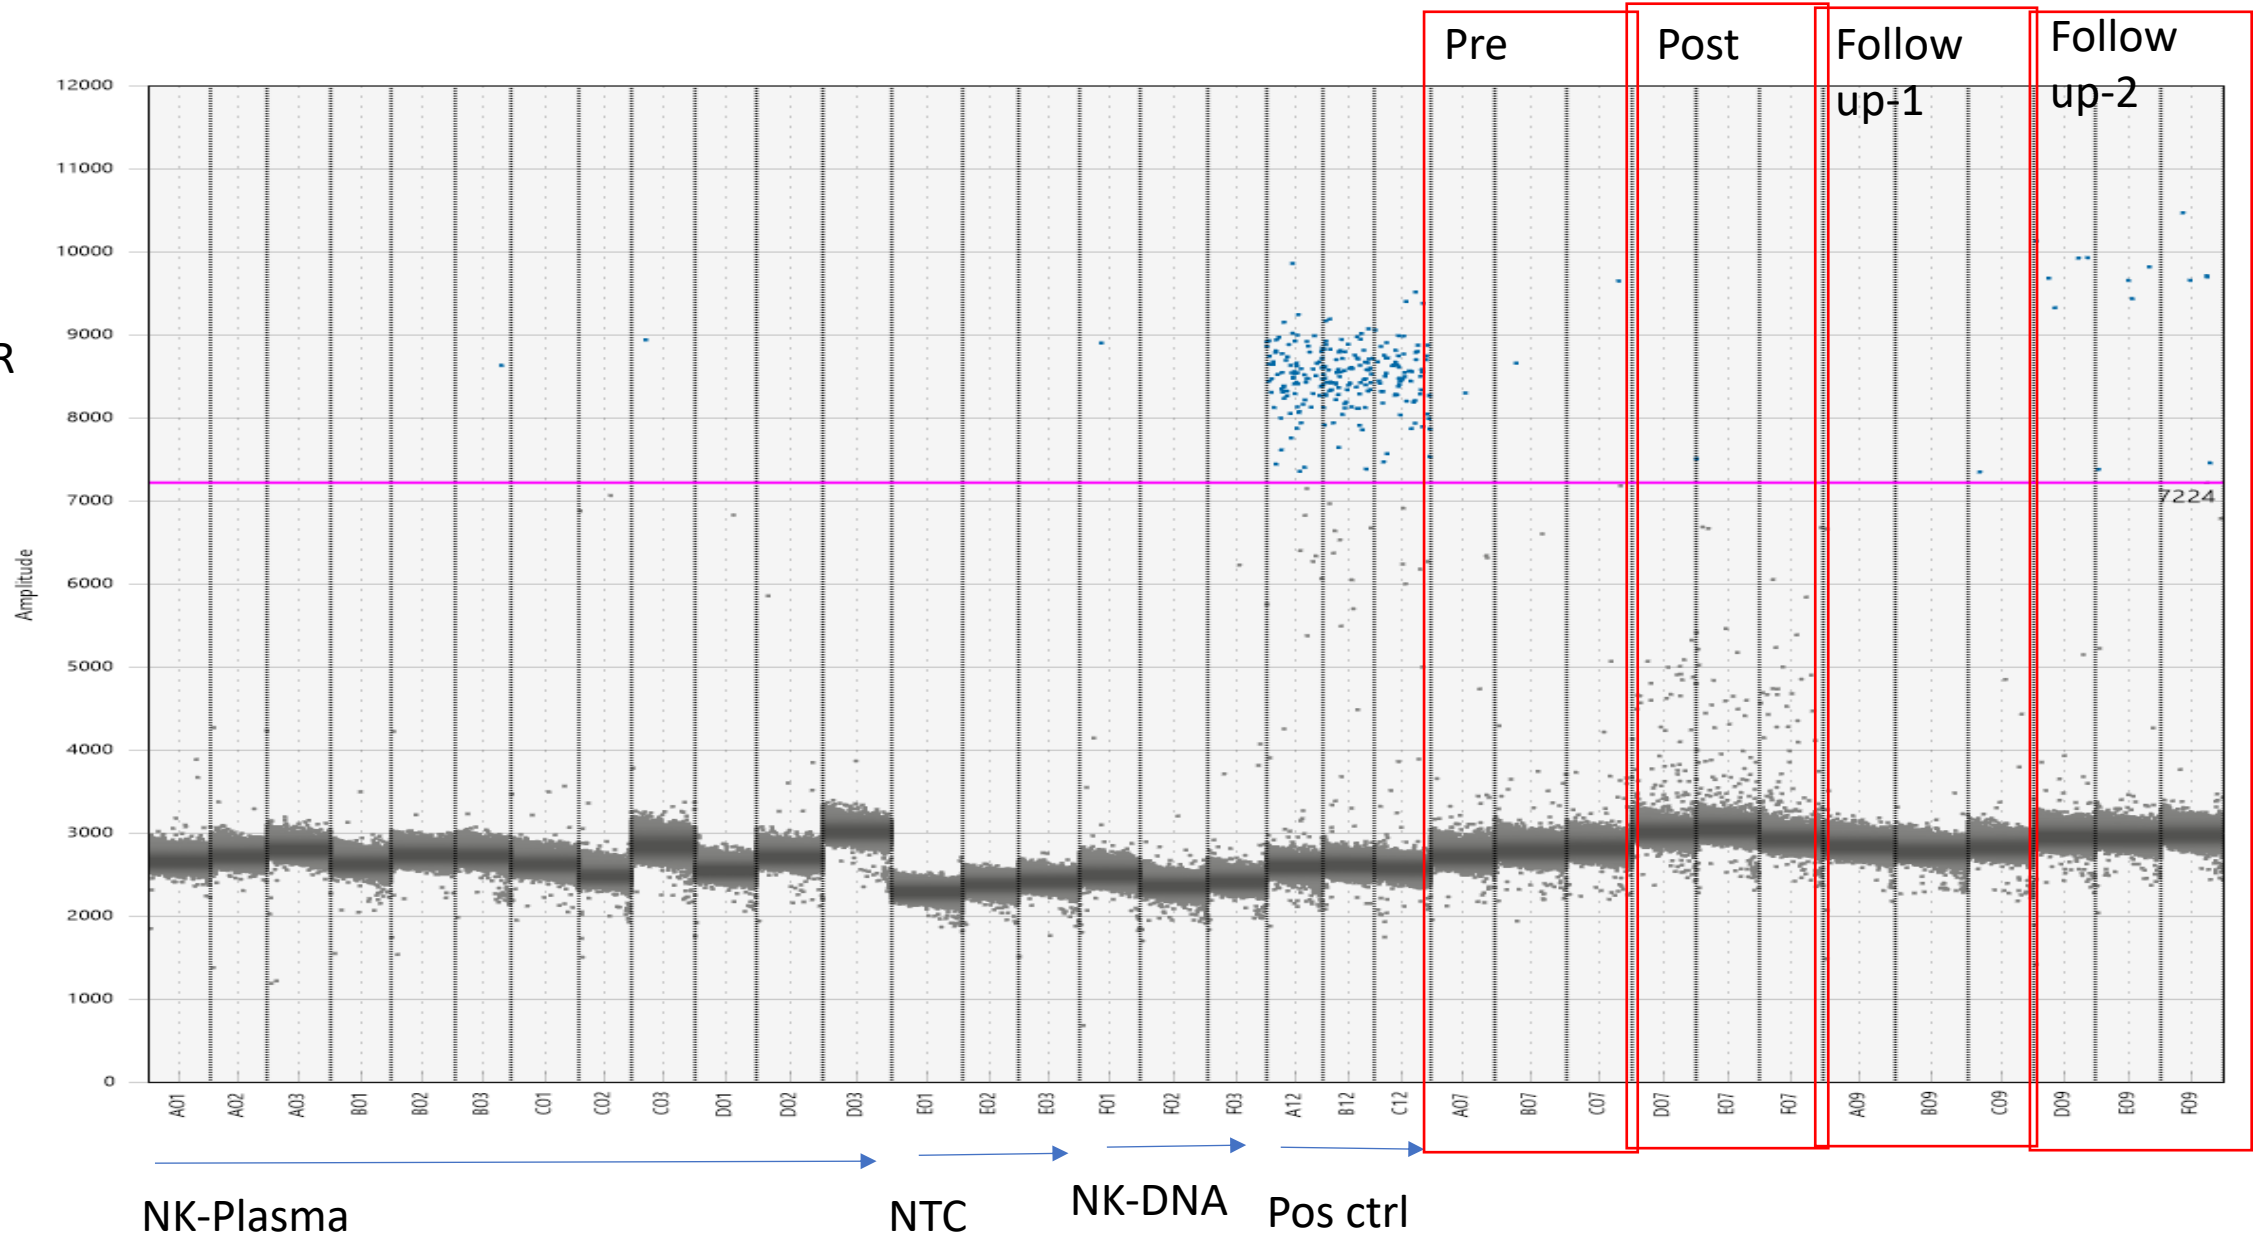

P25 - Final-WT

Assays: 1X TP53 WT,p.R196\* (HEX)

Gene target :TP53,p.R196\*,c.586C>T

1X TP53 WT  
,p.R196\*

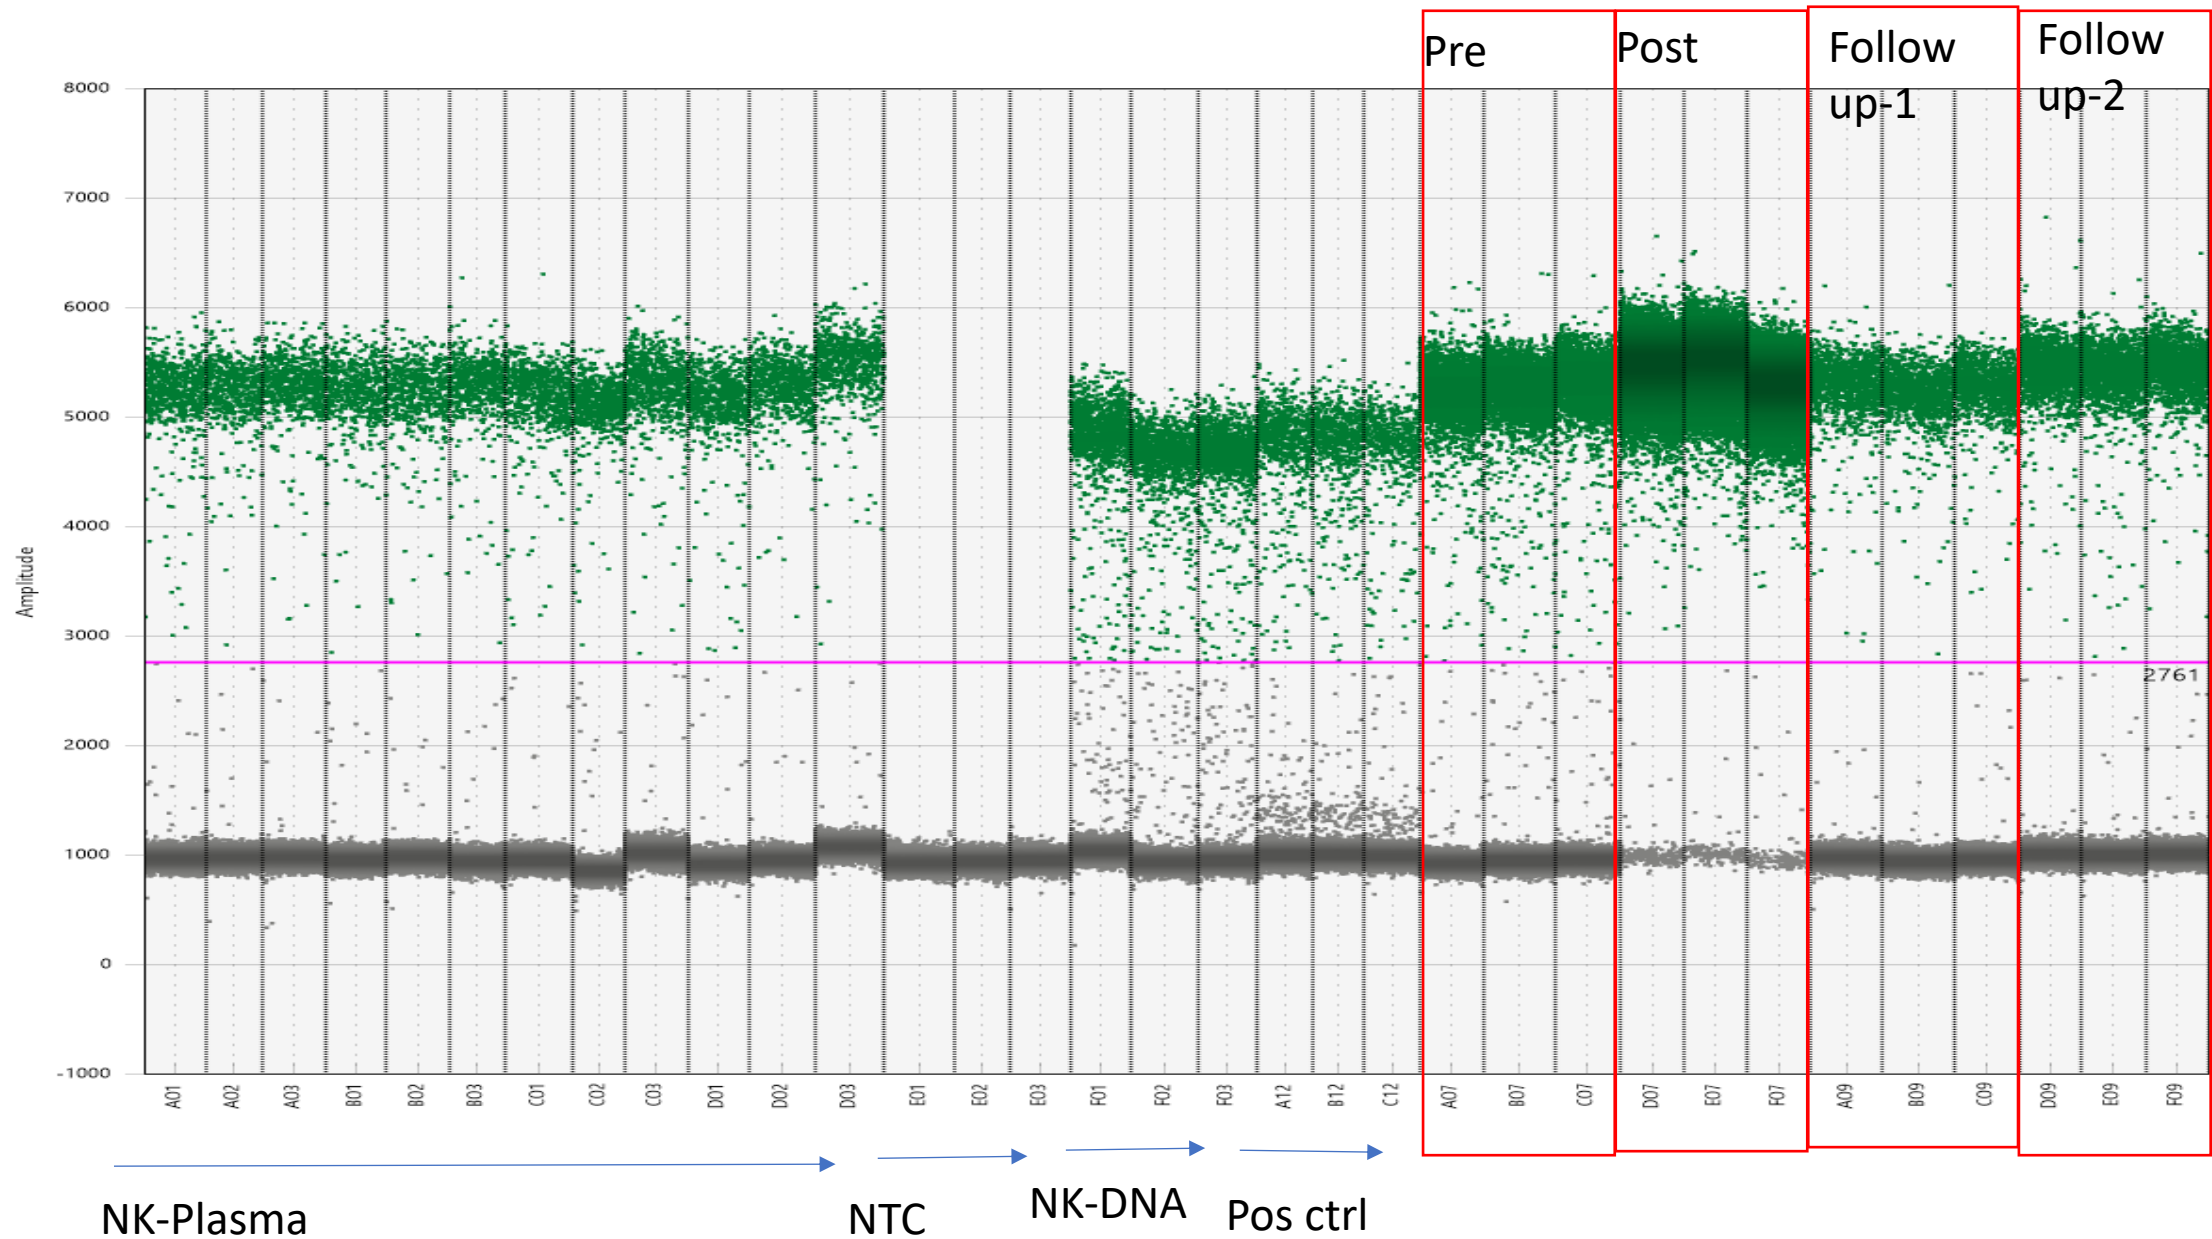

1X TP53,p.R196\*mut

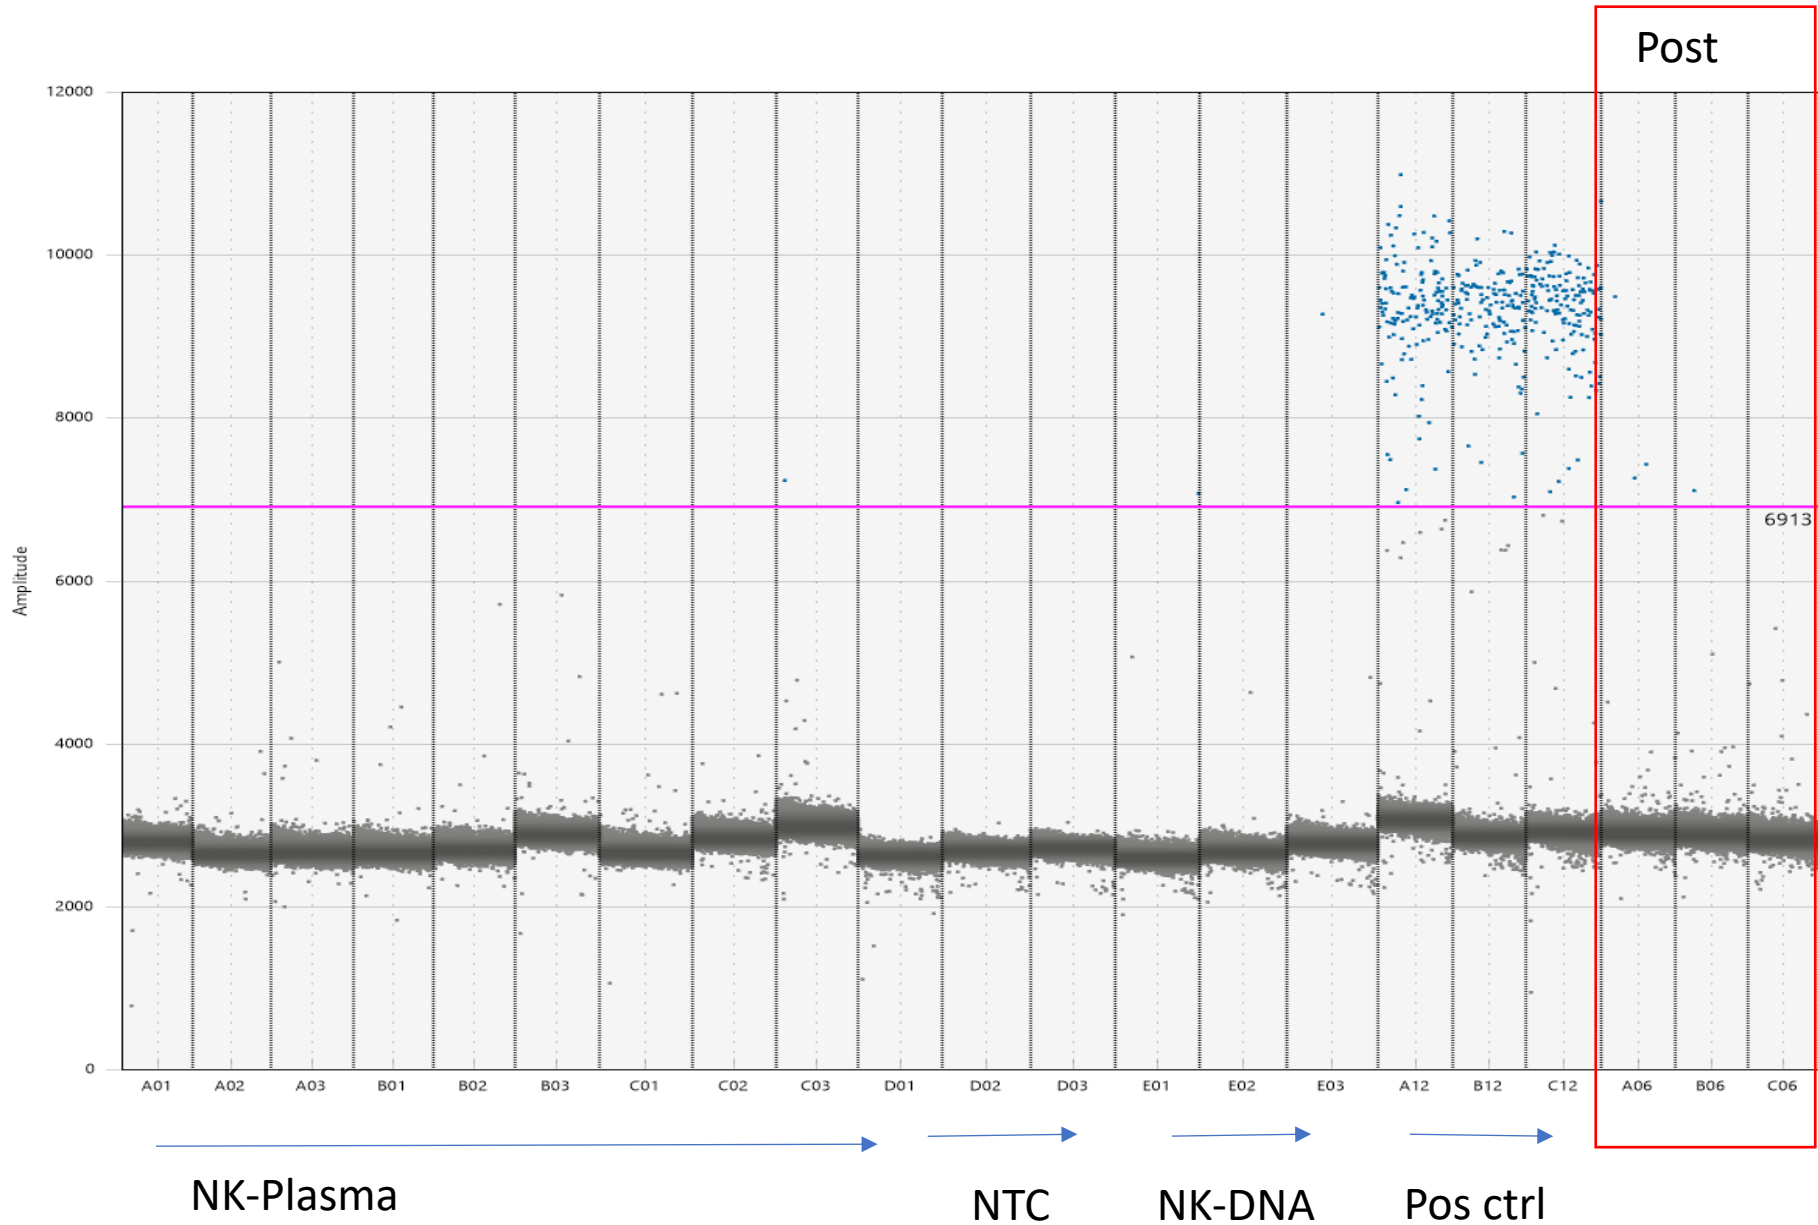

P25 - Final diluted  
Assays: 1X TP53 WT,p.R196\* (HEX)

Gene target :TP53,p.R196\*,c.586C>T

1X TP53  
WT,p.R196\*

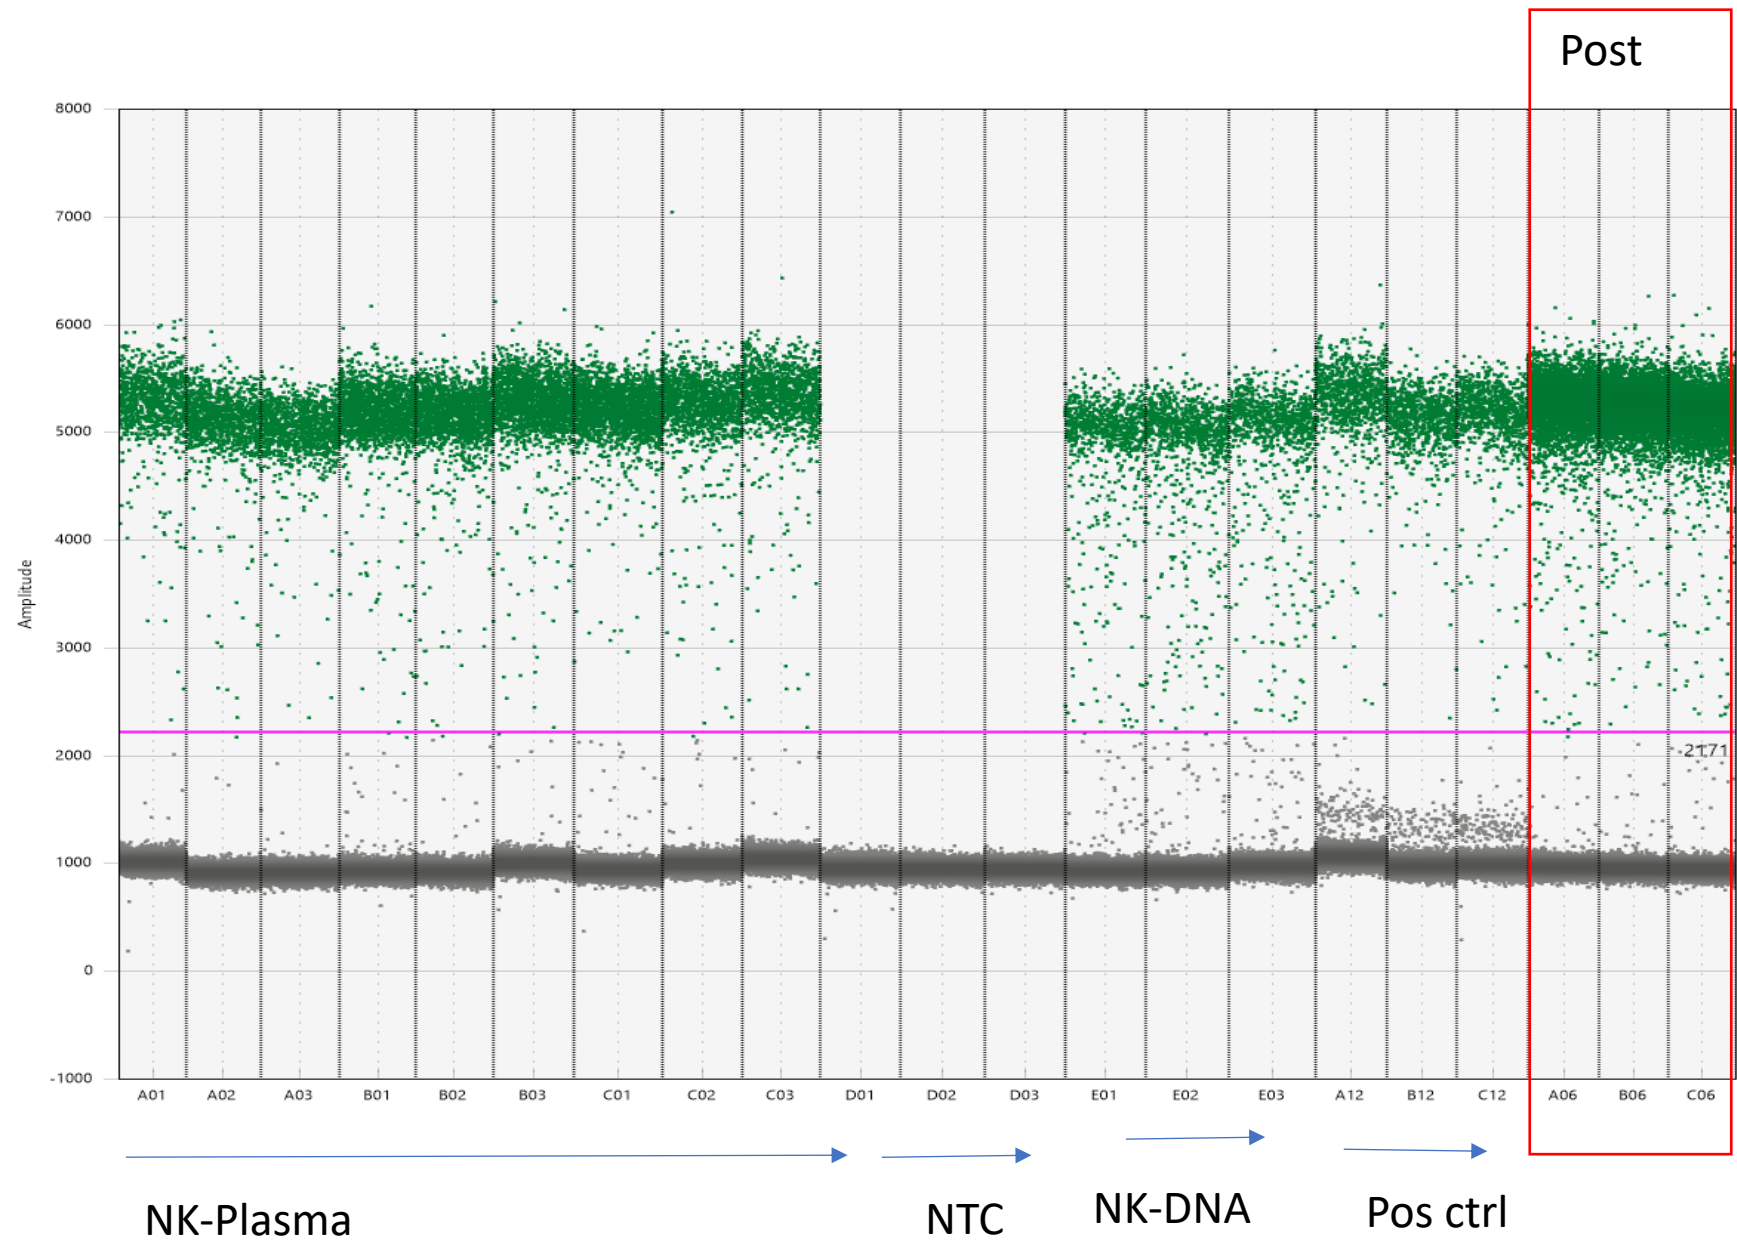

Positive control

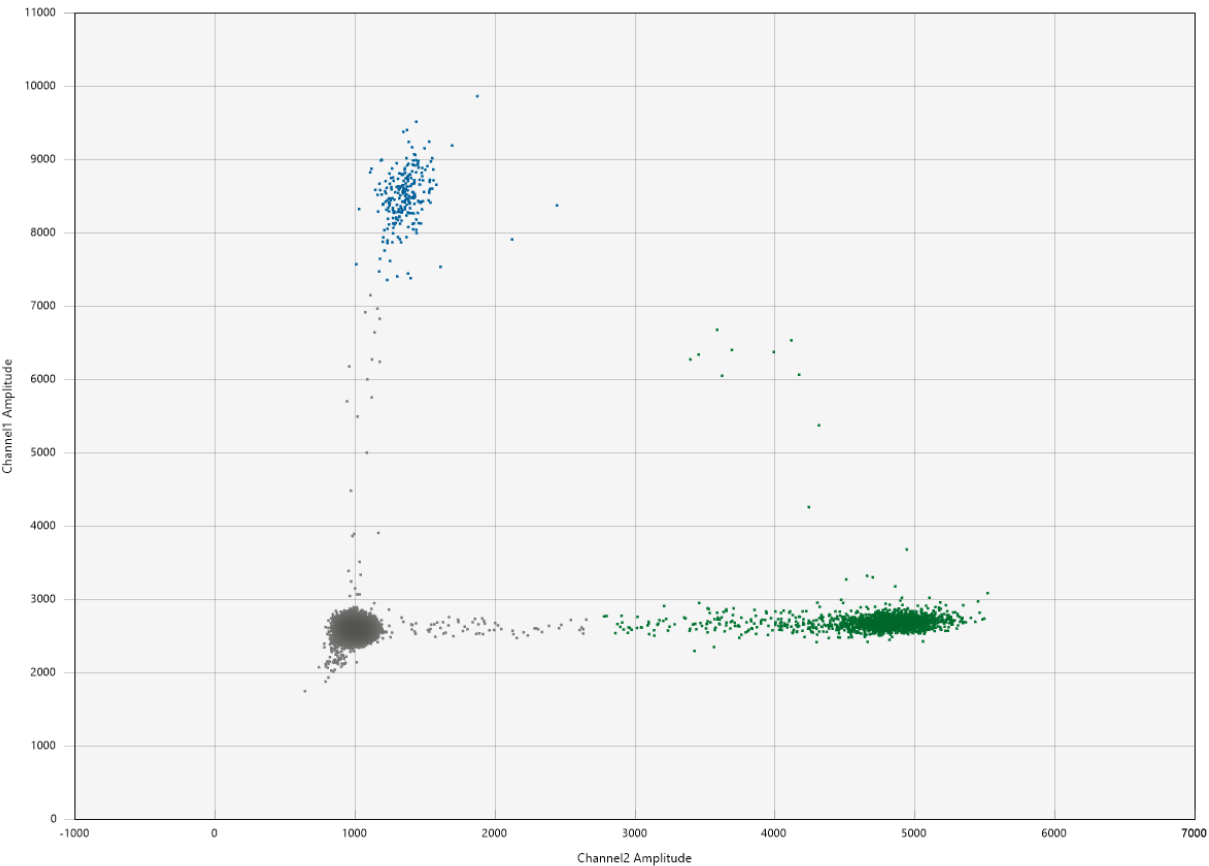

NK-plasma cfDNA

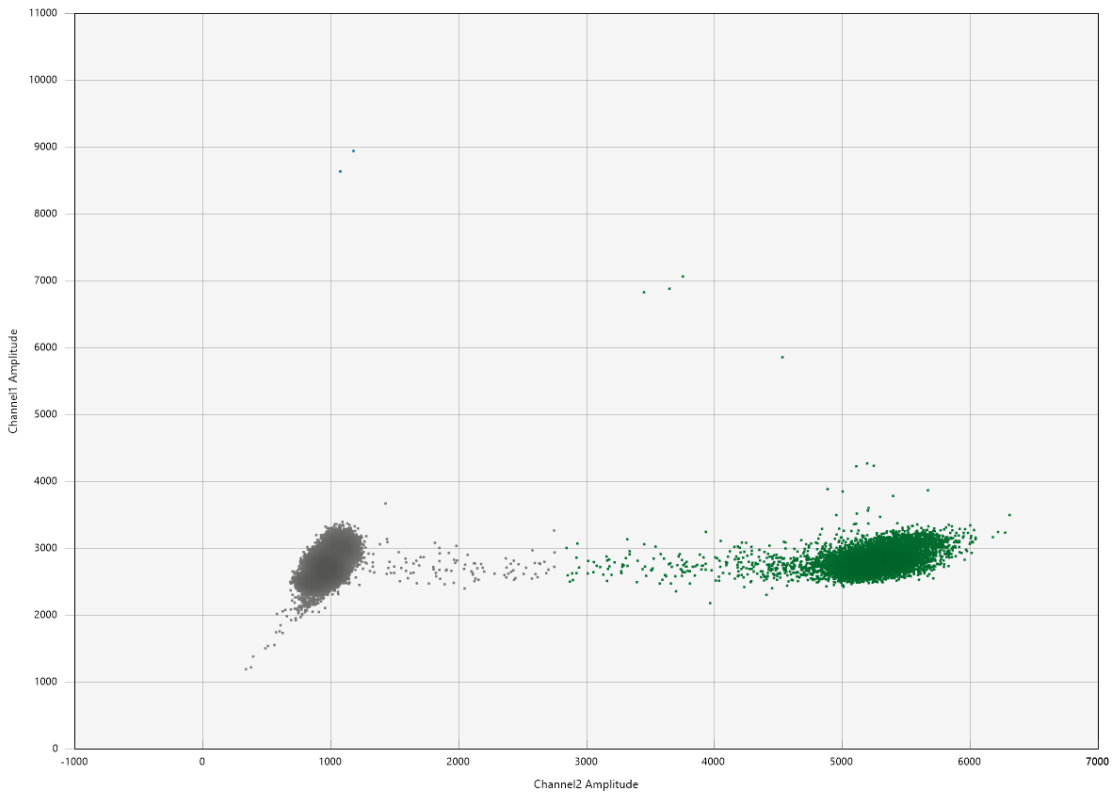

Pre-surgery

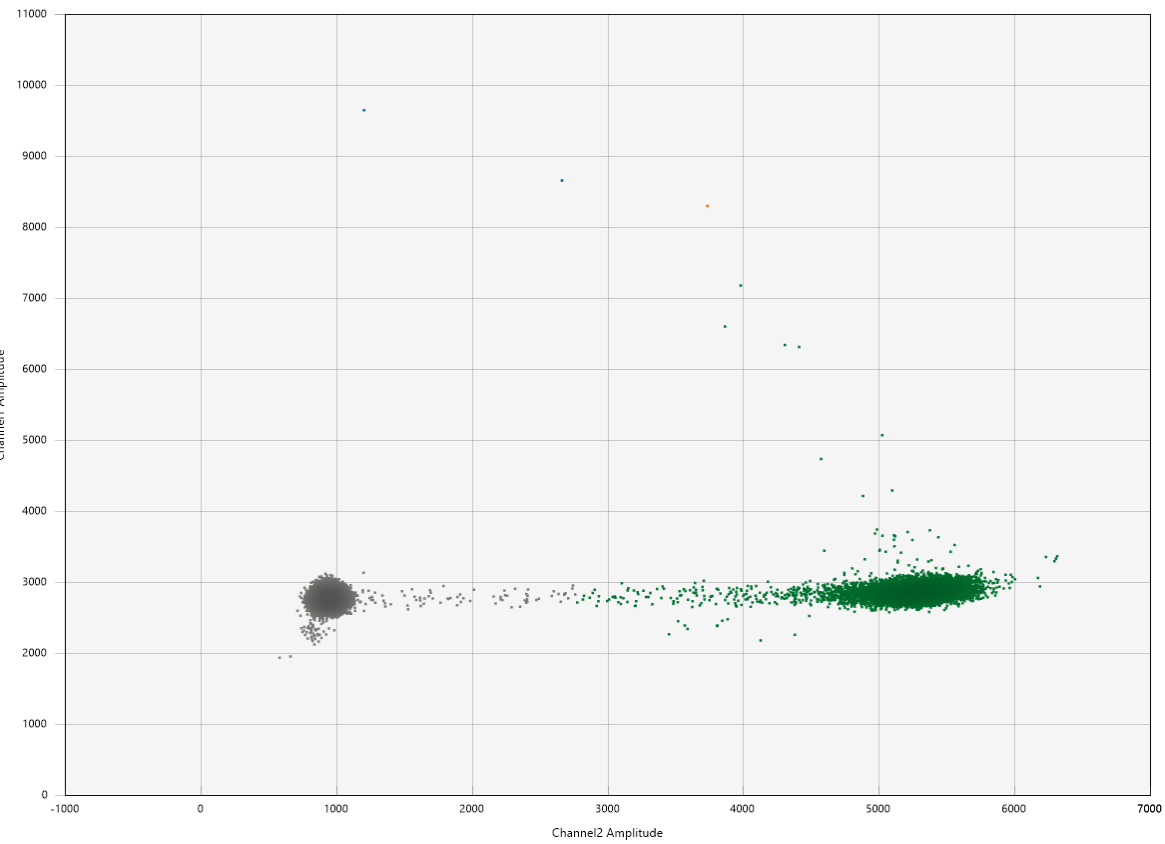

Post-surgery

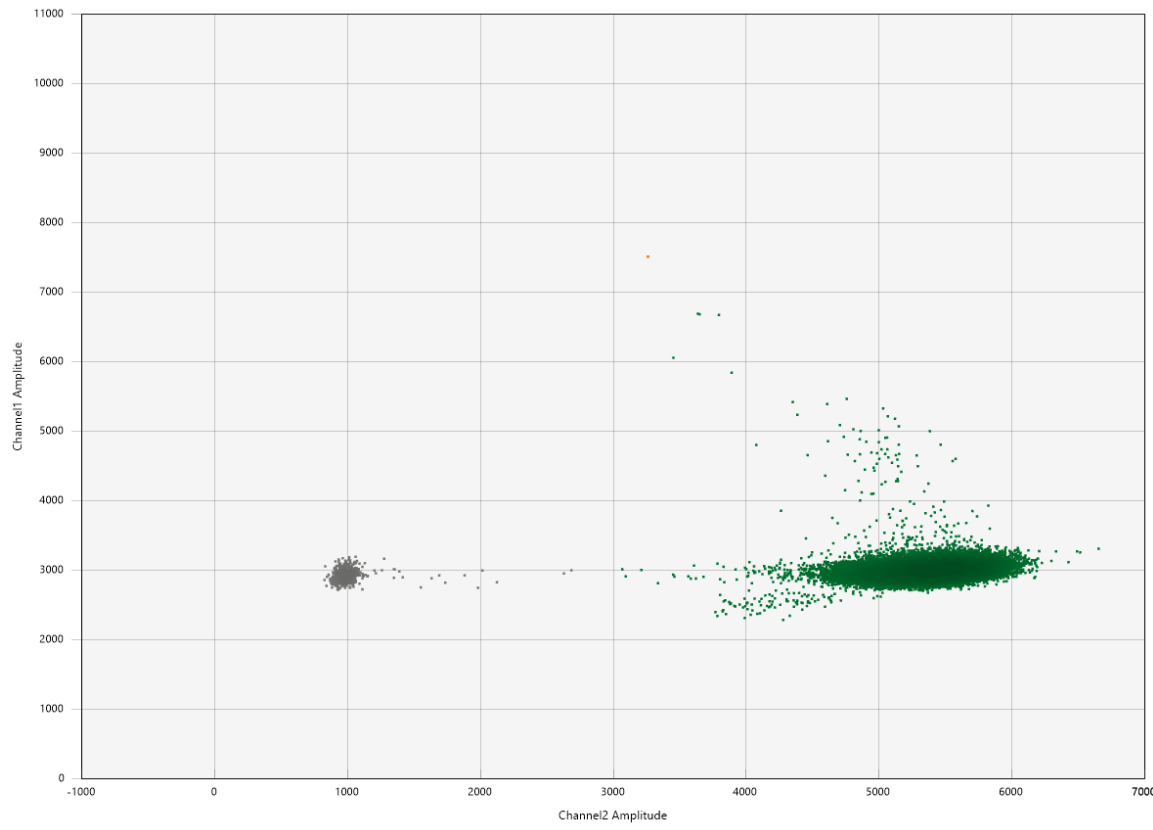

Post-surgery - diluted

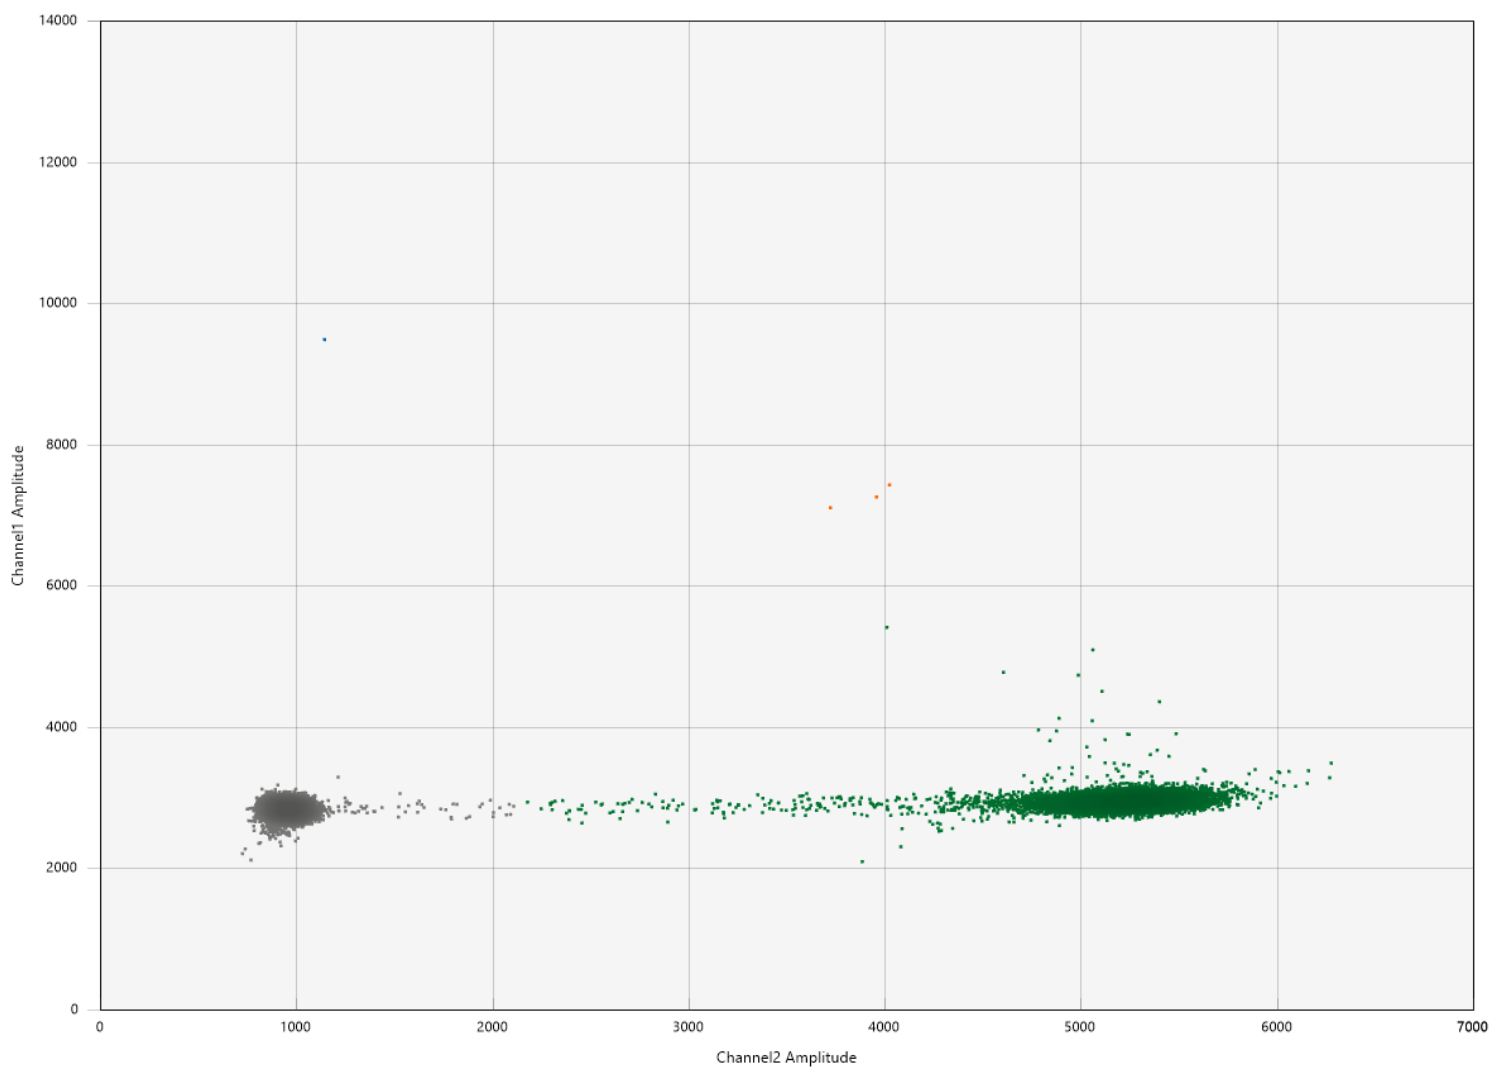

Follow up 1

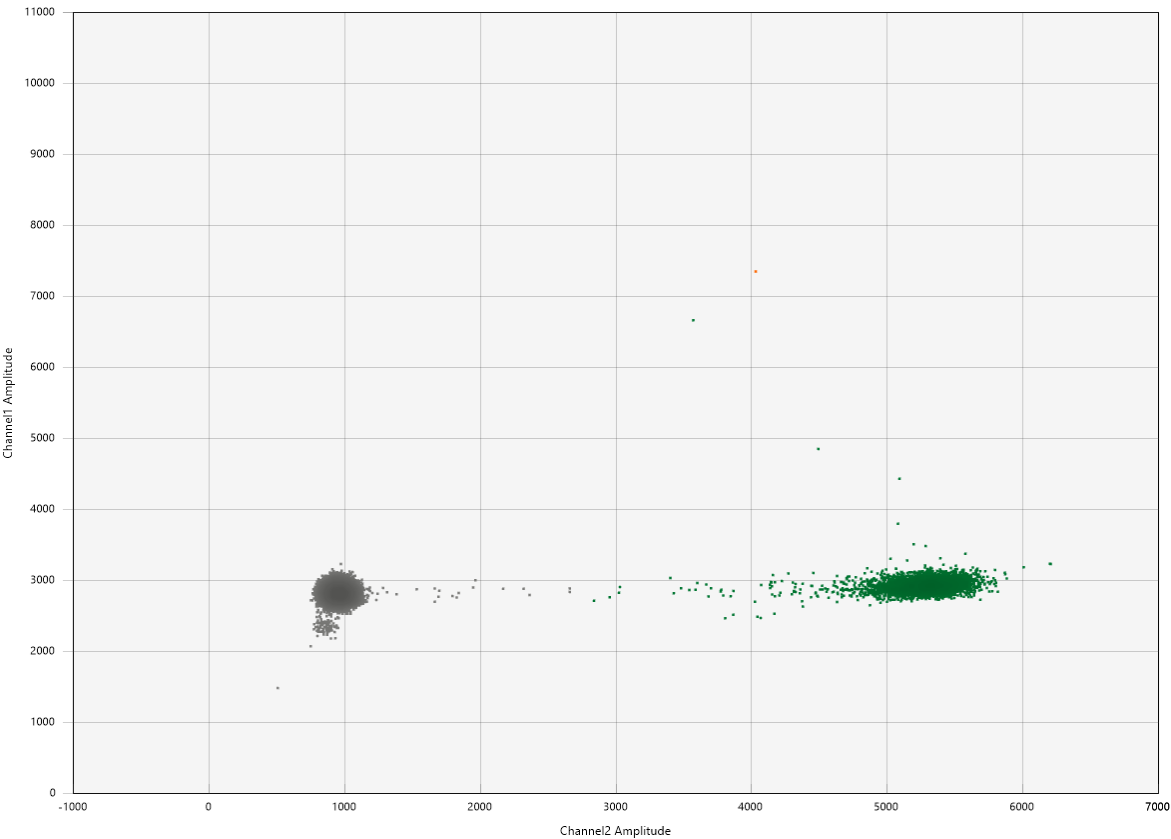

Follow up 2

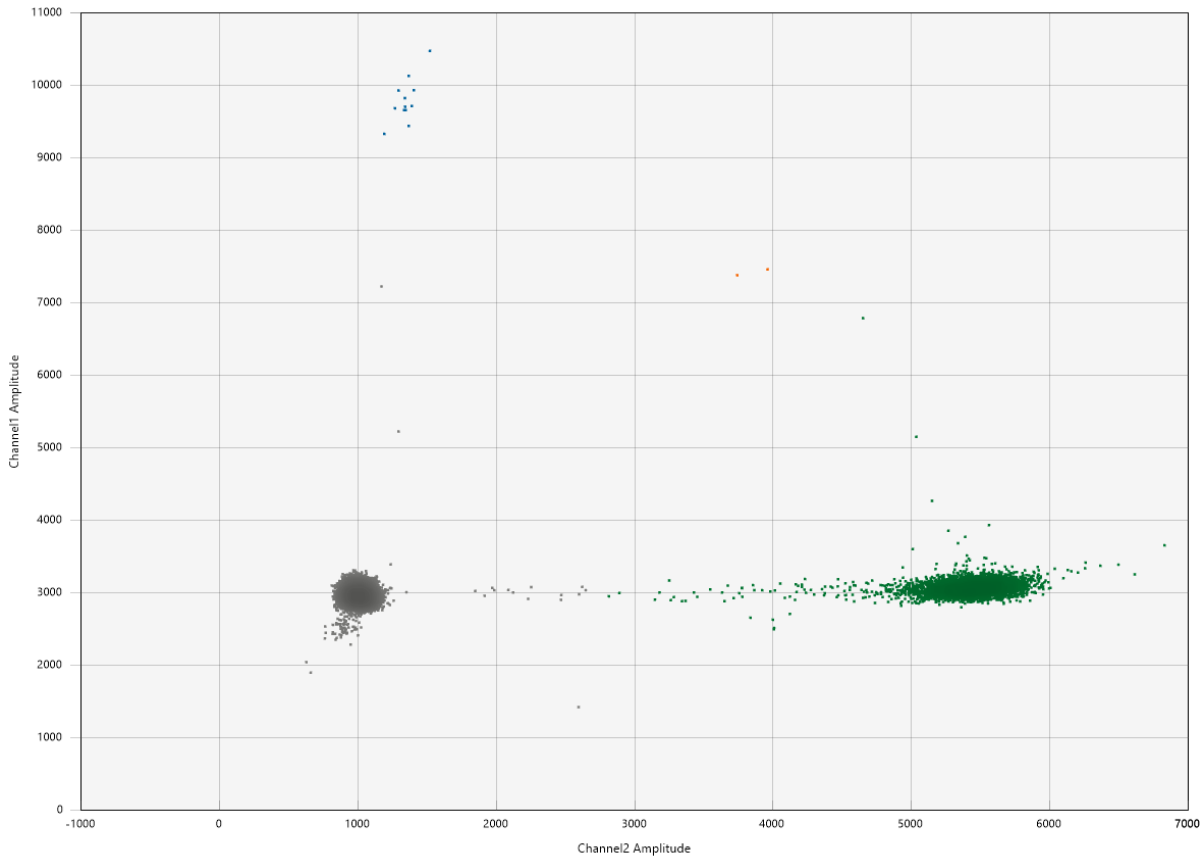

Concentration plots   Pre ,Post-surgery and Follow-up1 and 2

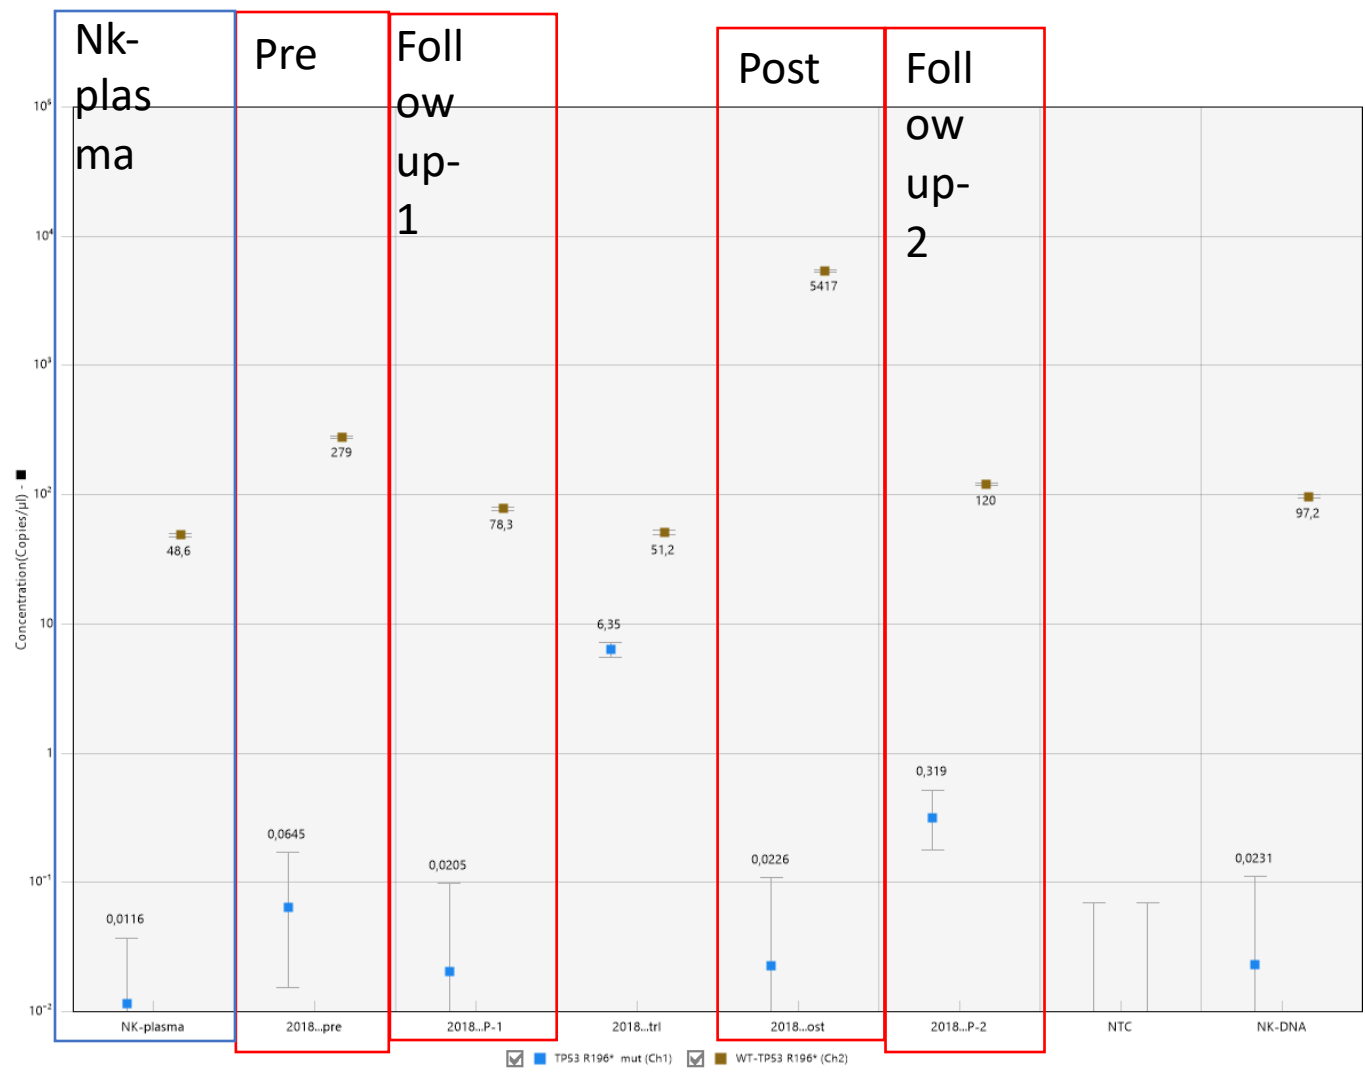

Post-dilution

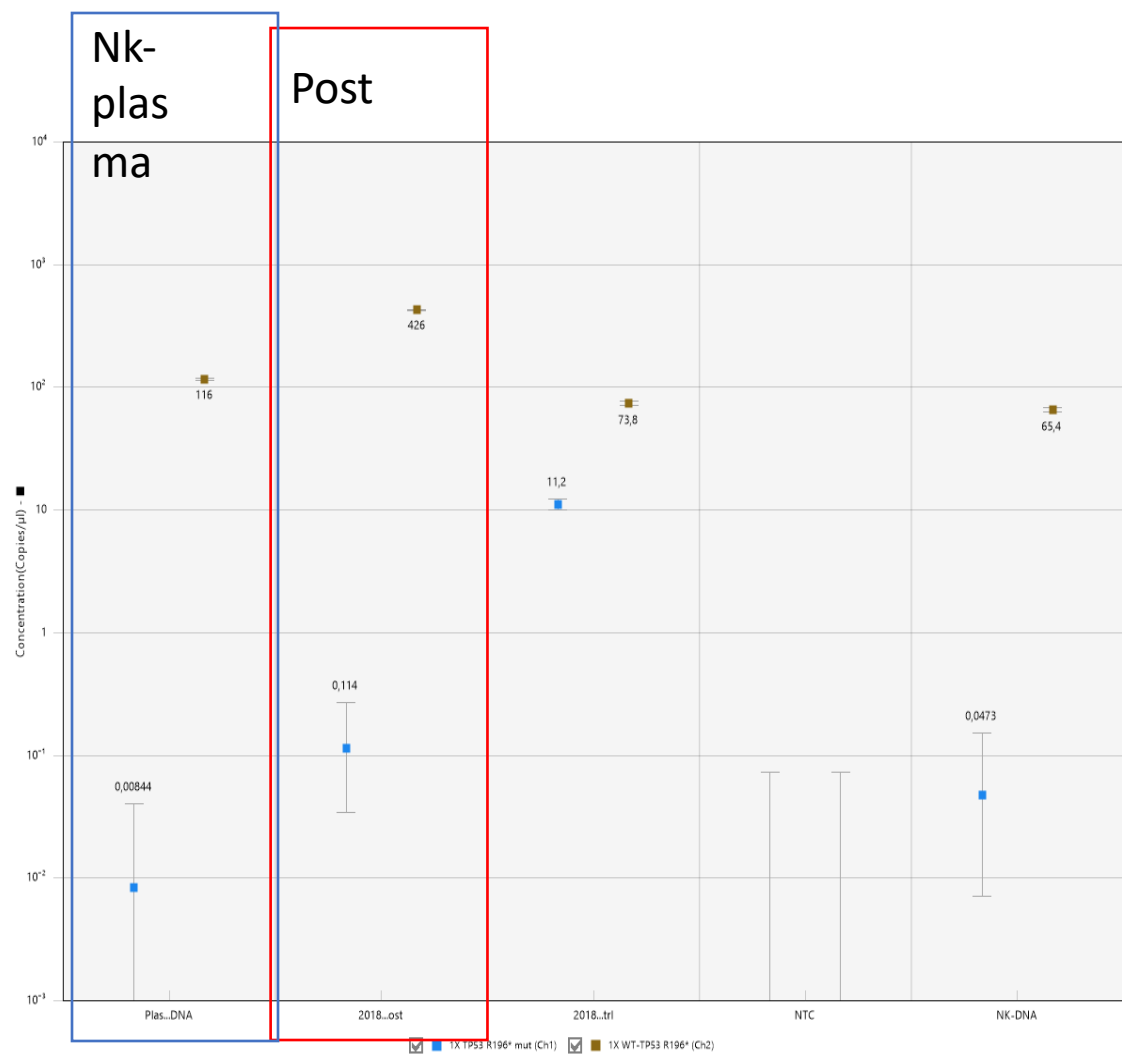

Assays: 1X TP53,p.R248Q mut (FAM) and 1X TP53 WT,p.R248Q (HEX)  
0.5X ERBB2,p.S310Y mut (FAM) and 1X dark probe for ERBB2,p.S310Y,

1X TP53,p.R248Q mut

0.5X ERBB2,p.S310Y mut

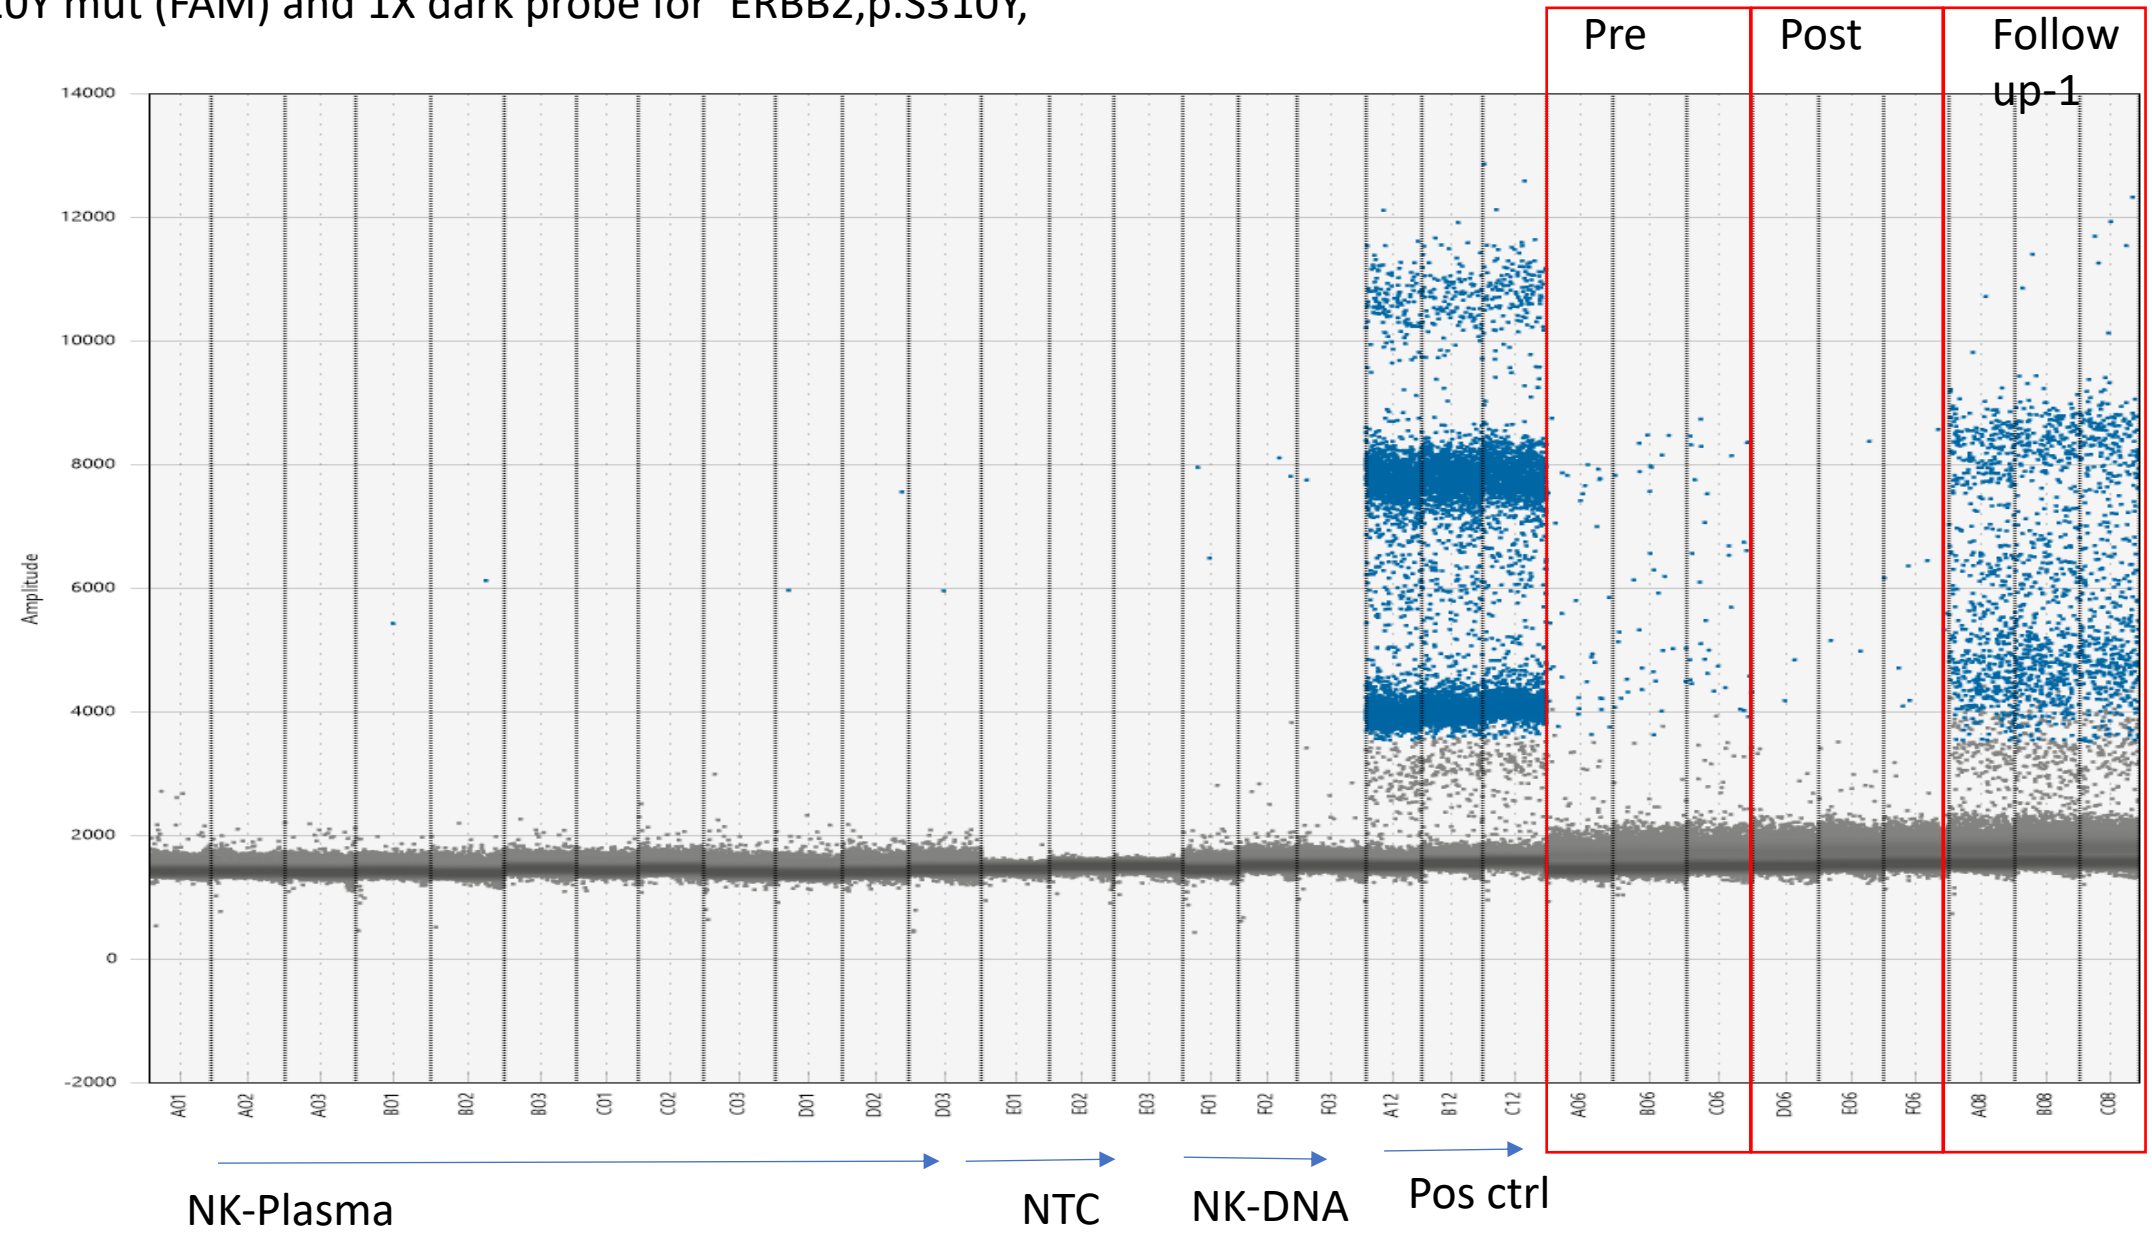

Assays:1X TP53 WT,p.R248Q (HEX) and 1X dark probe for ERBB2,p.S310Y,

1X TP53  
WT,p.R248Q mu  
t

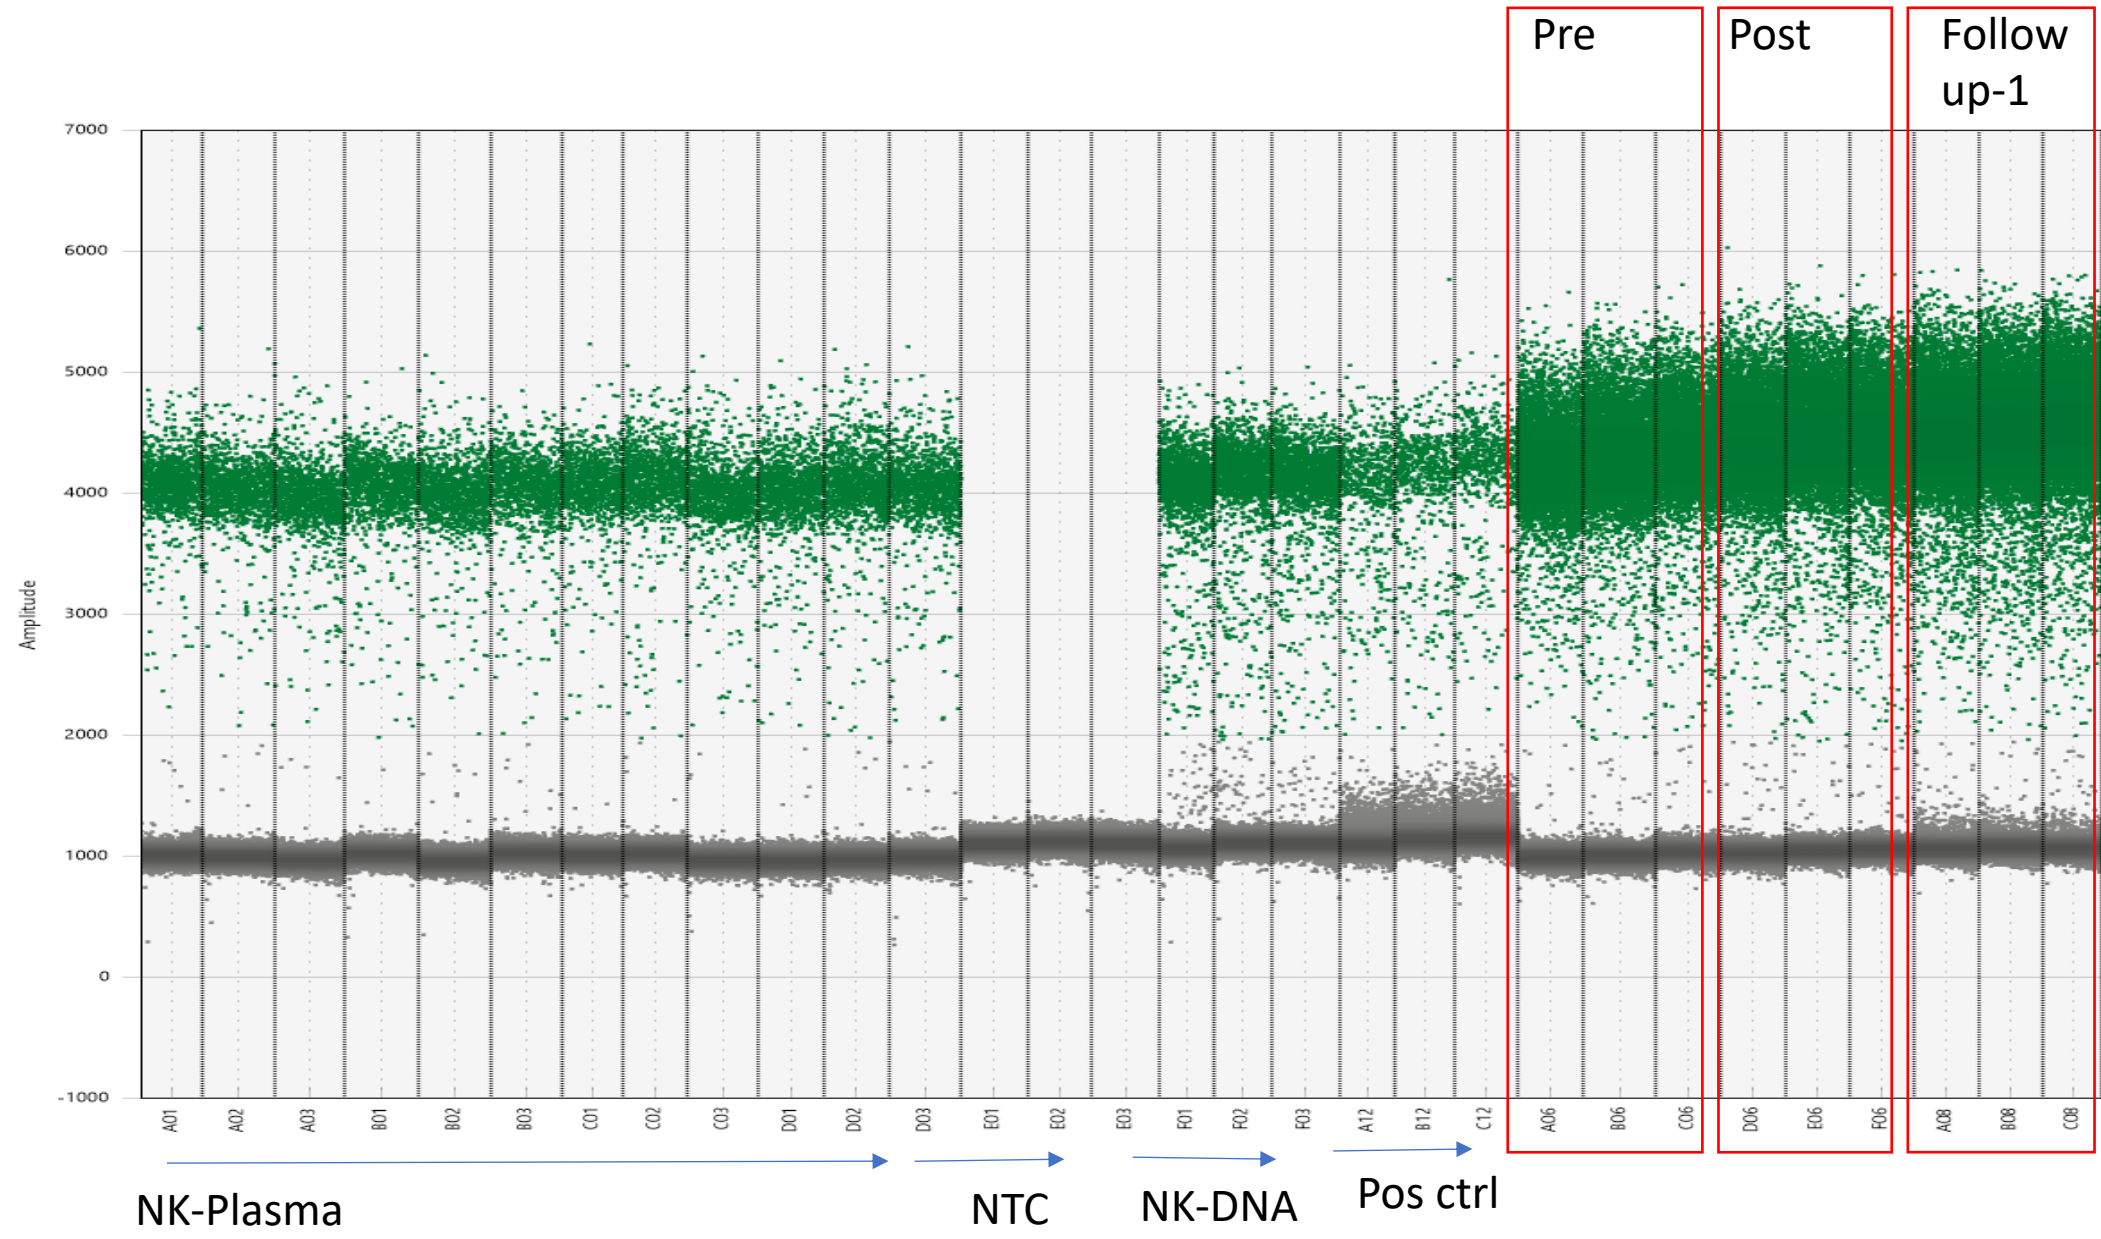

P15 Diluted

Gene targets : TP53,p.R248Q, c.743G>A and ERBB2,p.S310Y, c.929C>A

1X TP53,p.R248Q mut

0.5X ERBB2,p.S310Y mut

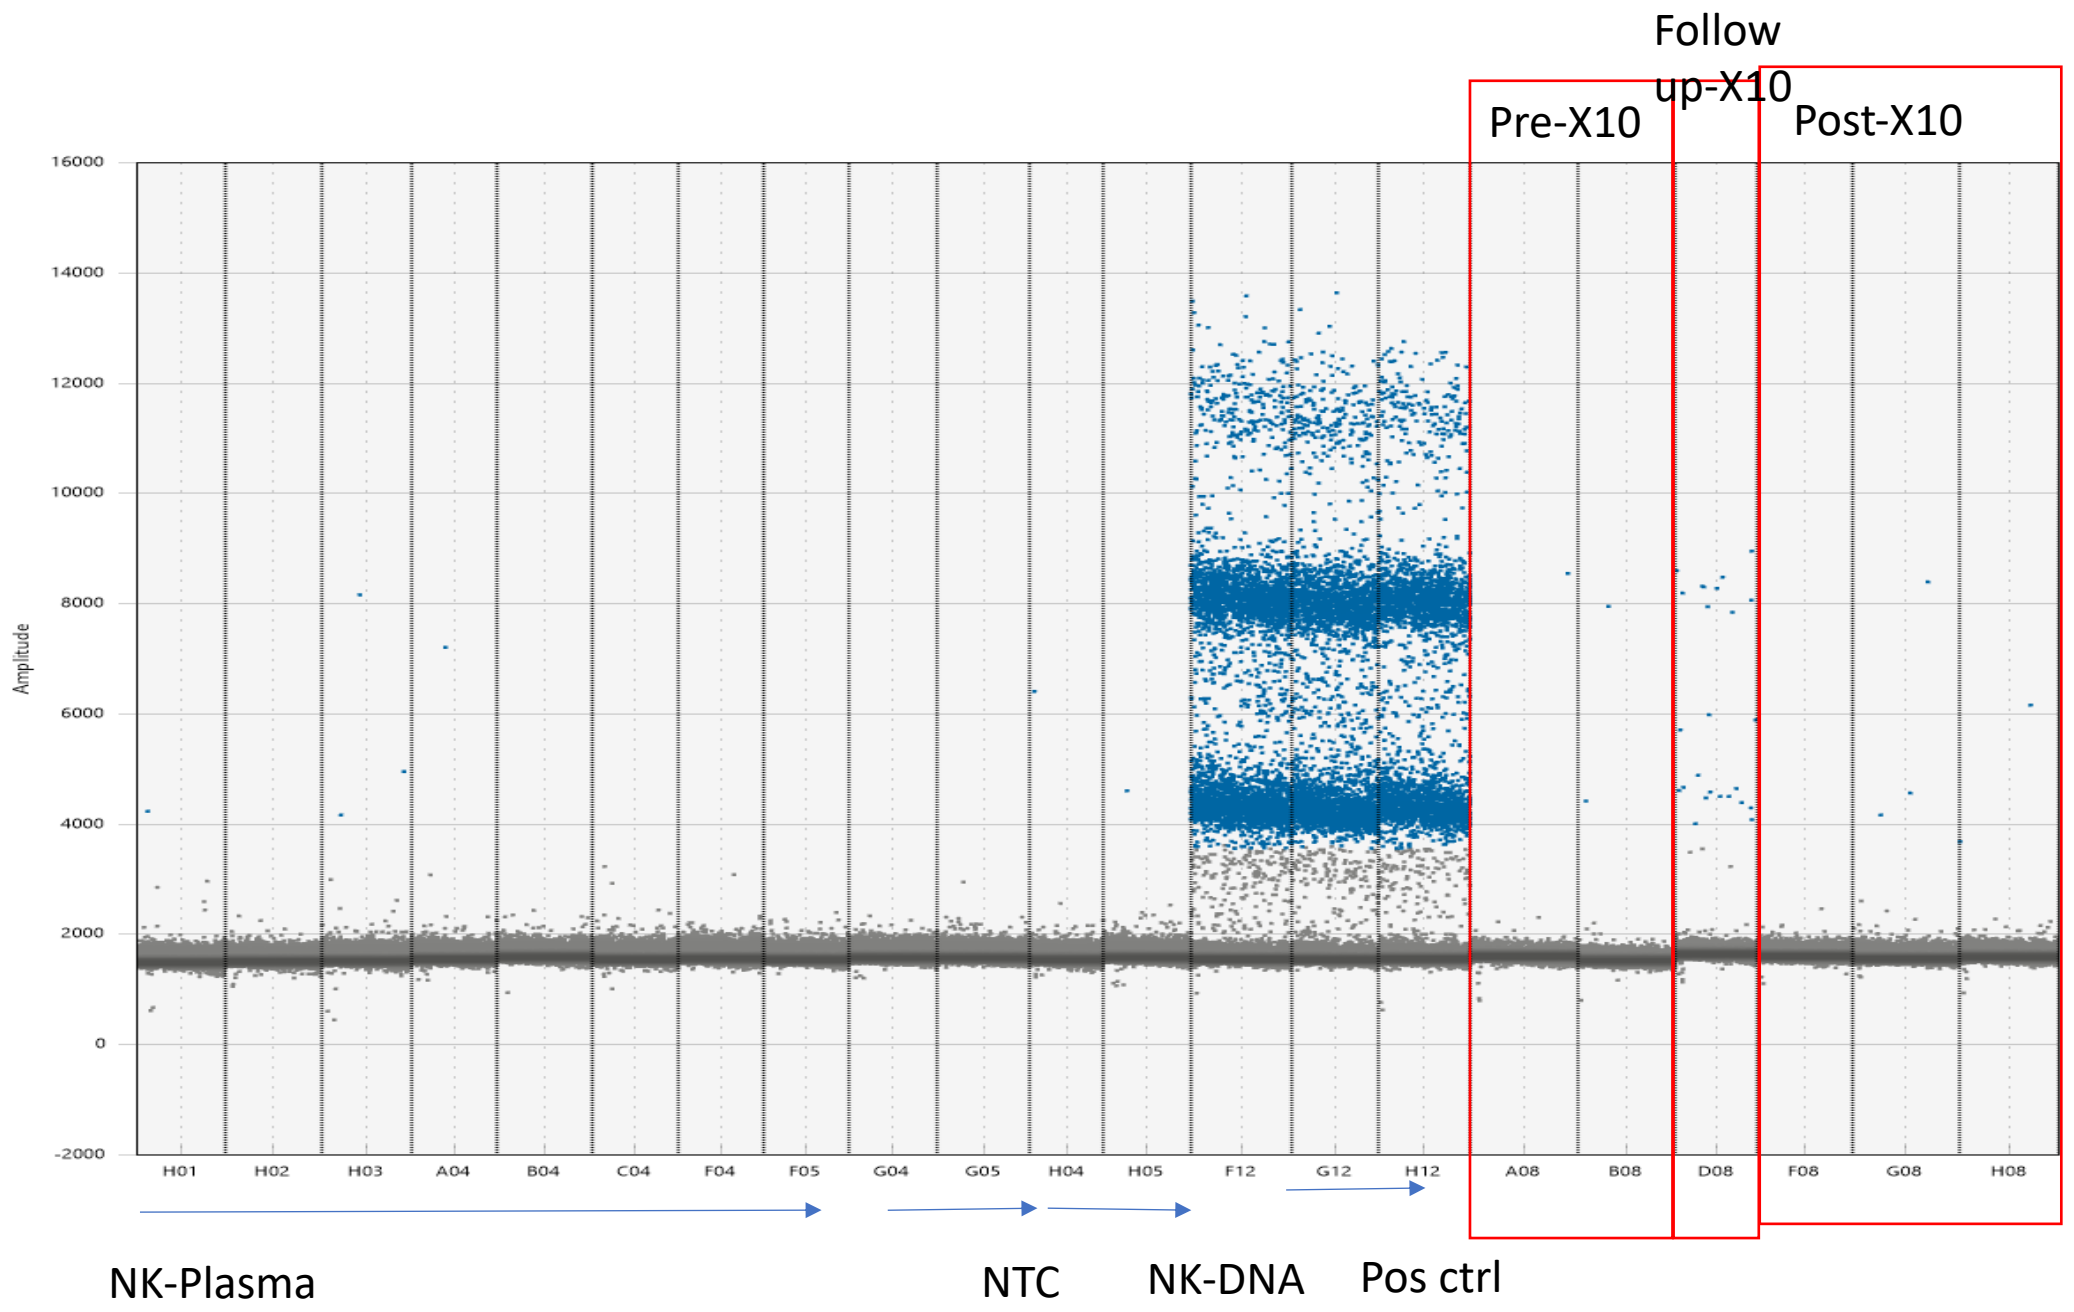

NK-Plasma

NTC

NK-DNA

Pos ctrl

P15 - Final diluted

Gene targets : TP53,p.R248Q, c.743G>A and ERBB2,p.S310Y, c.929C>A

Assays: 1X TP53 WT,p.R248Q (HEX) and 1X dark probe for ERBB2,p.S310Y

1X TP53  
WT,p.R248Q

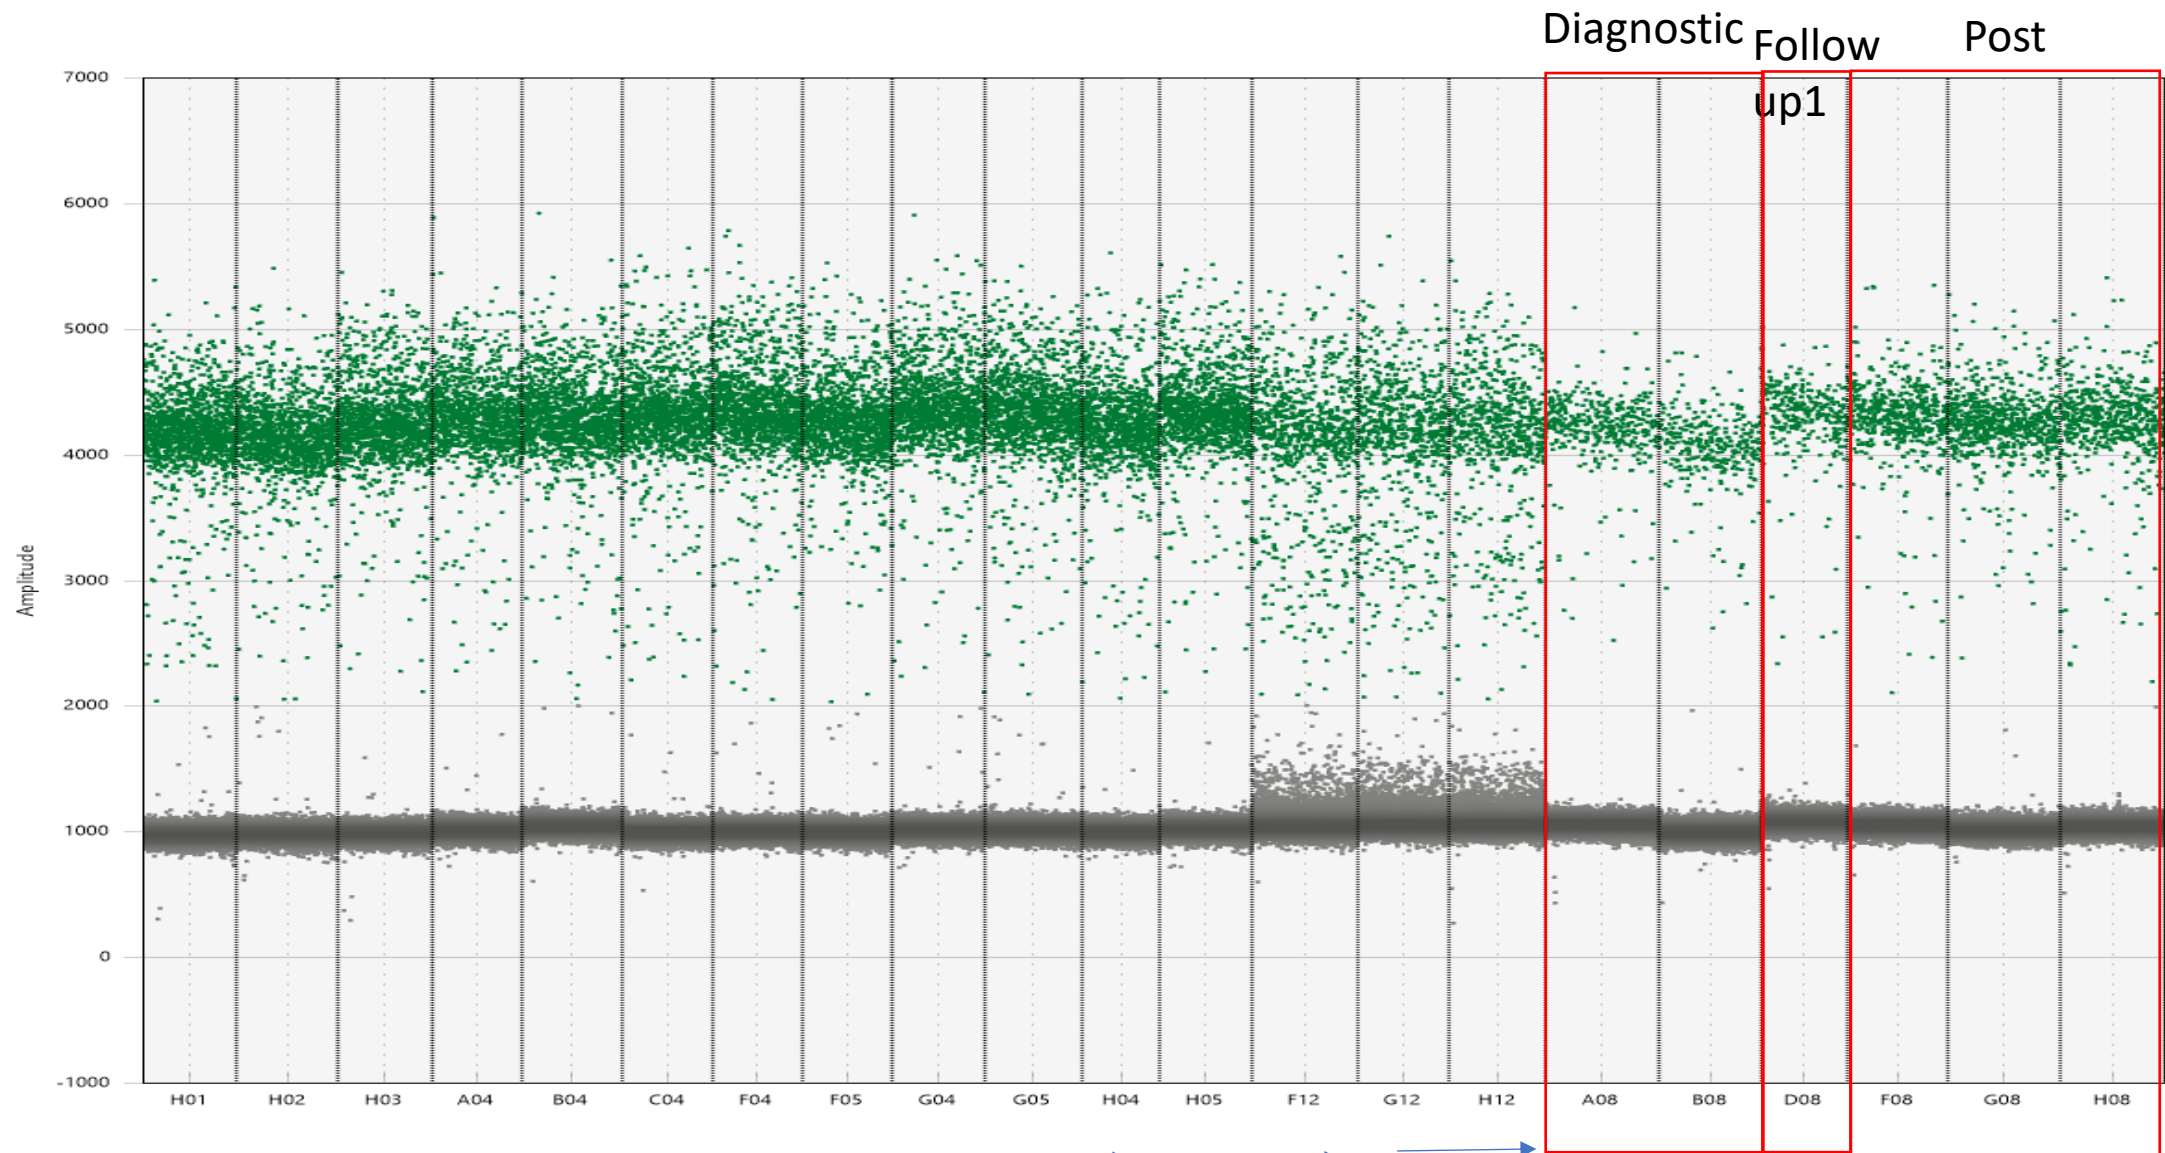

Neg ctrl - Plasma      NTC      Neg ctrl - DNA      Pos ctrl

Positive control

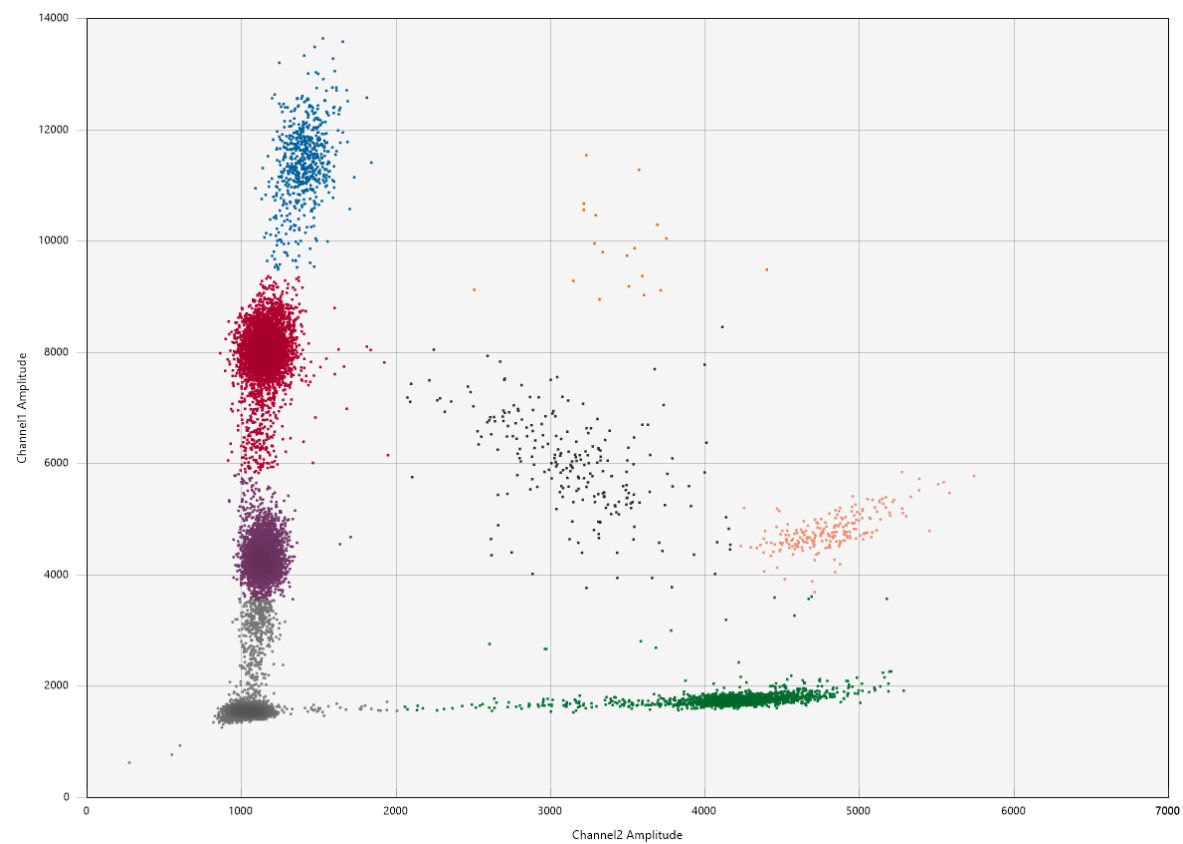

NK-plasma

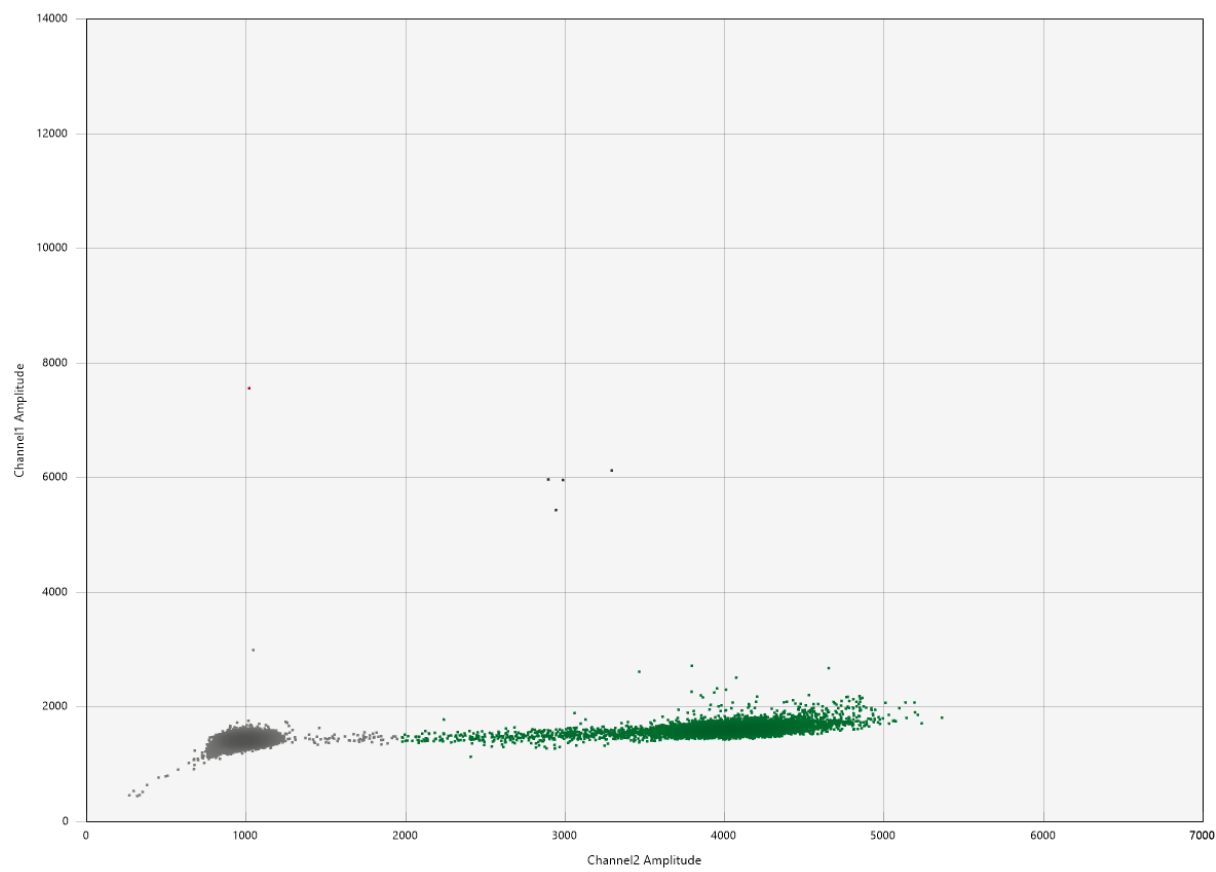

Pre-surgery

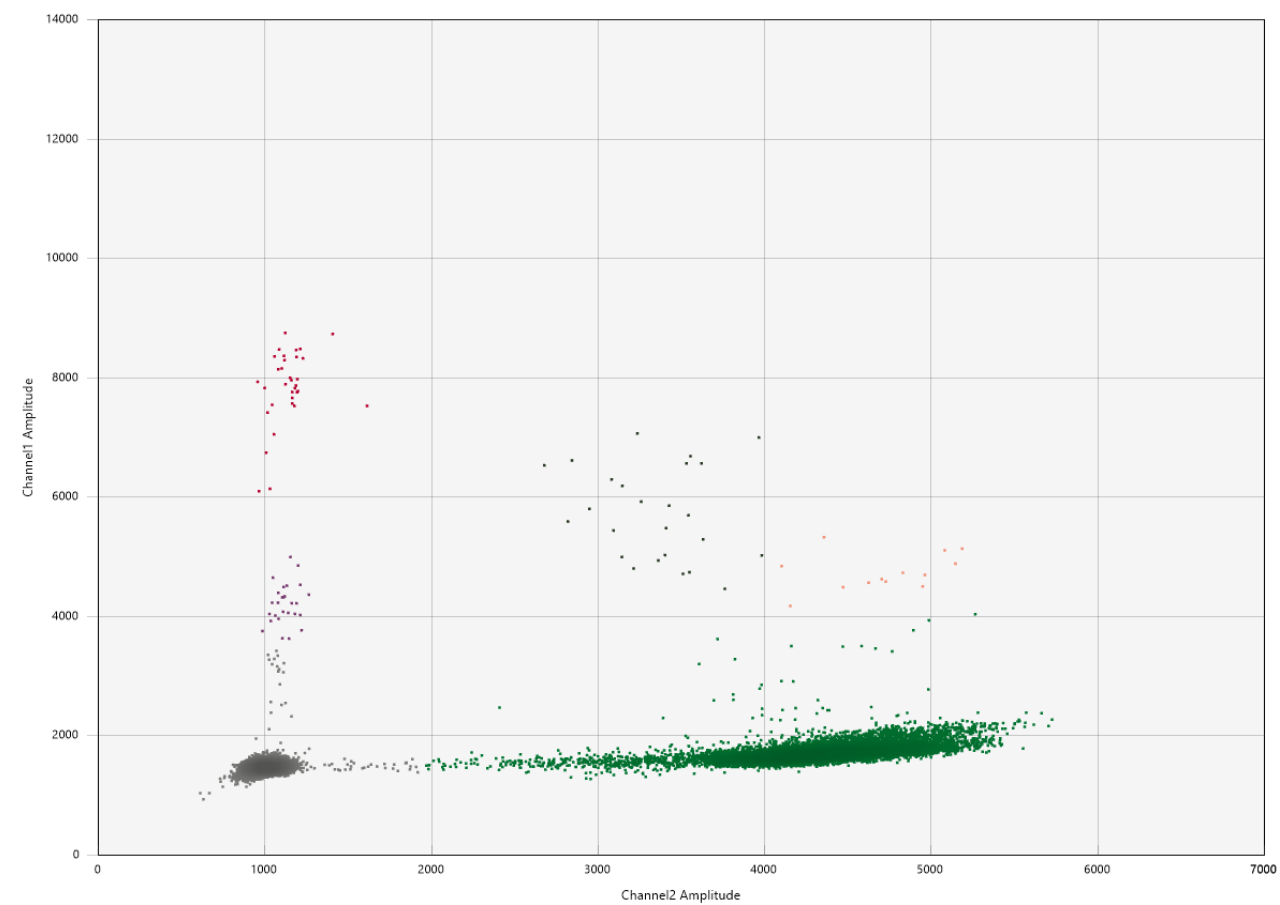

Pre-surgery- 10X dilution

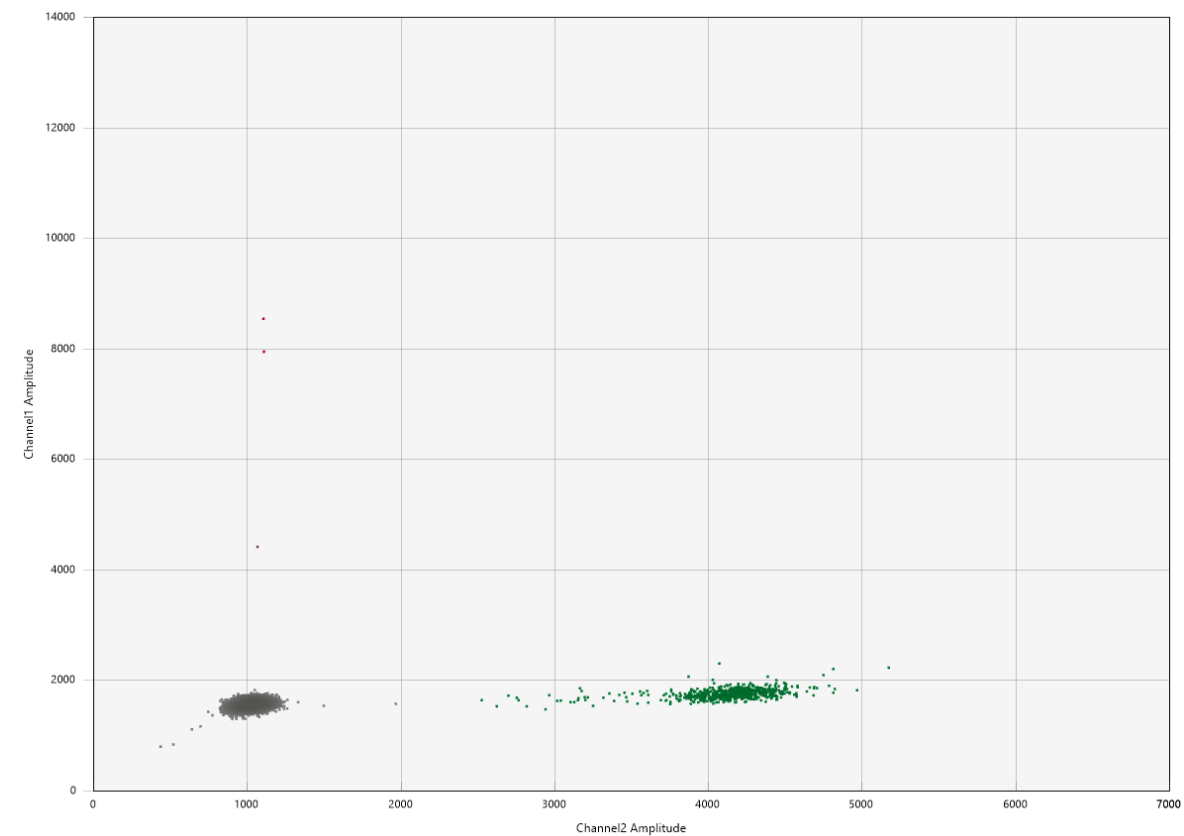

Post-surgery

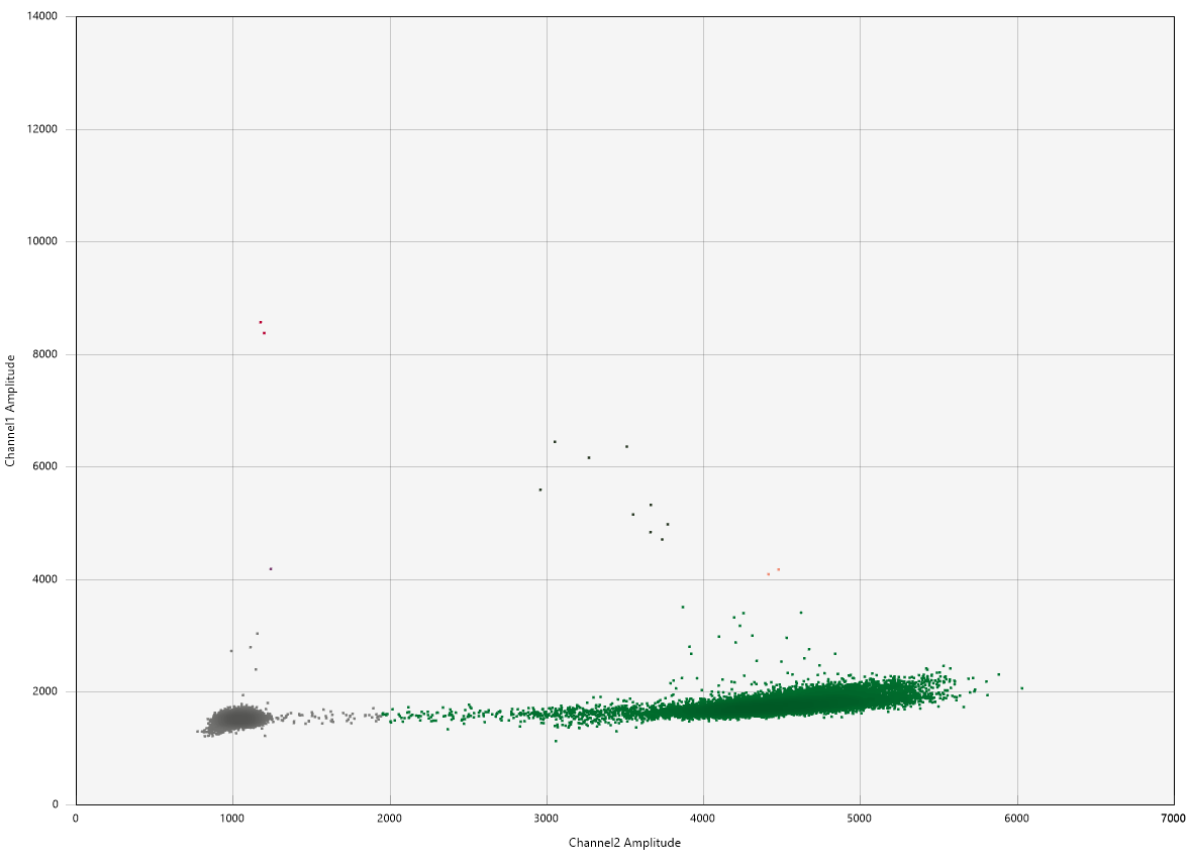

Post-surgery-10X dilution

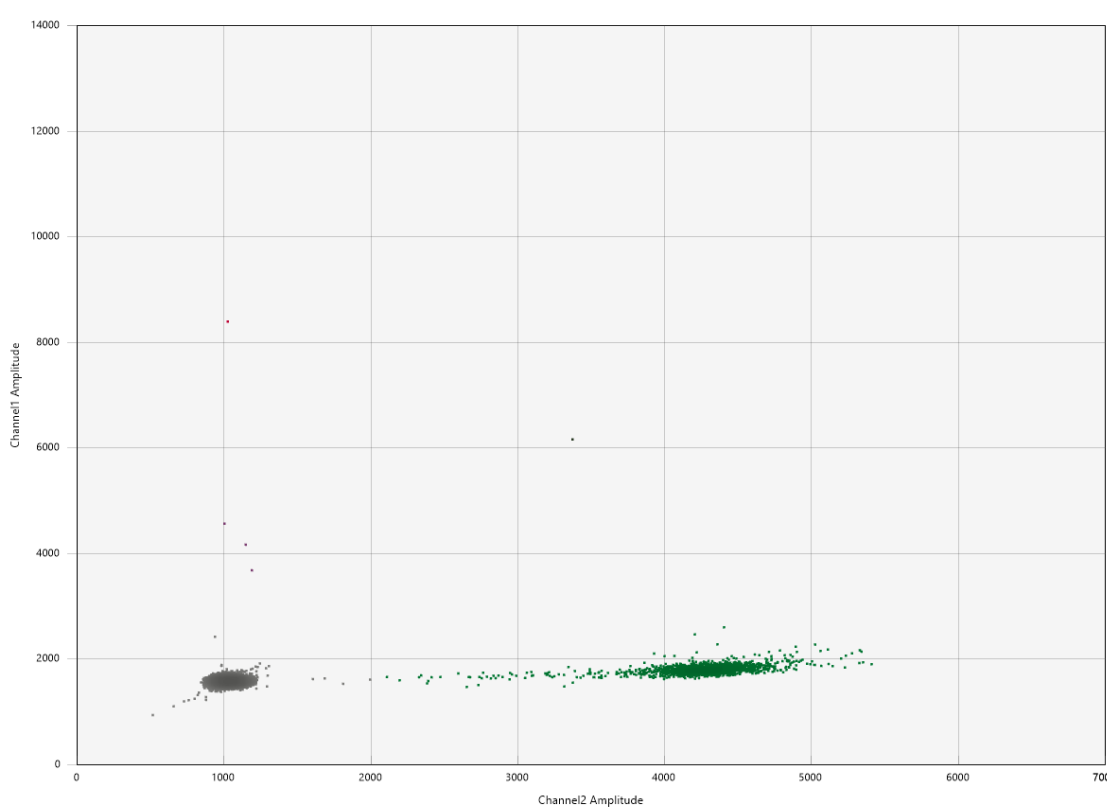

follow-up 1

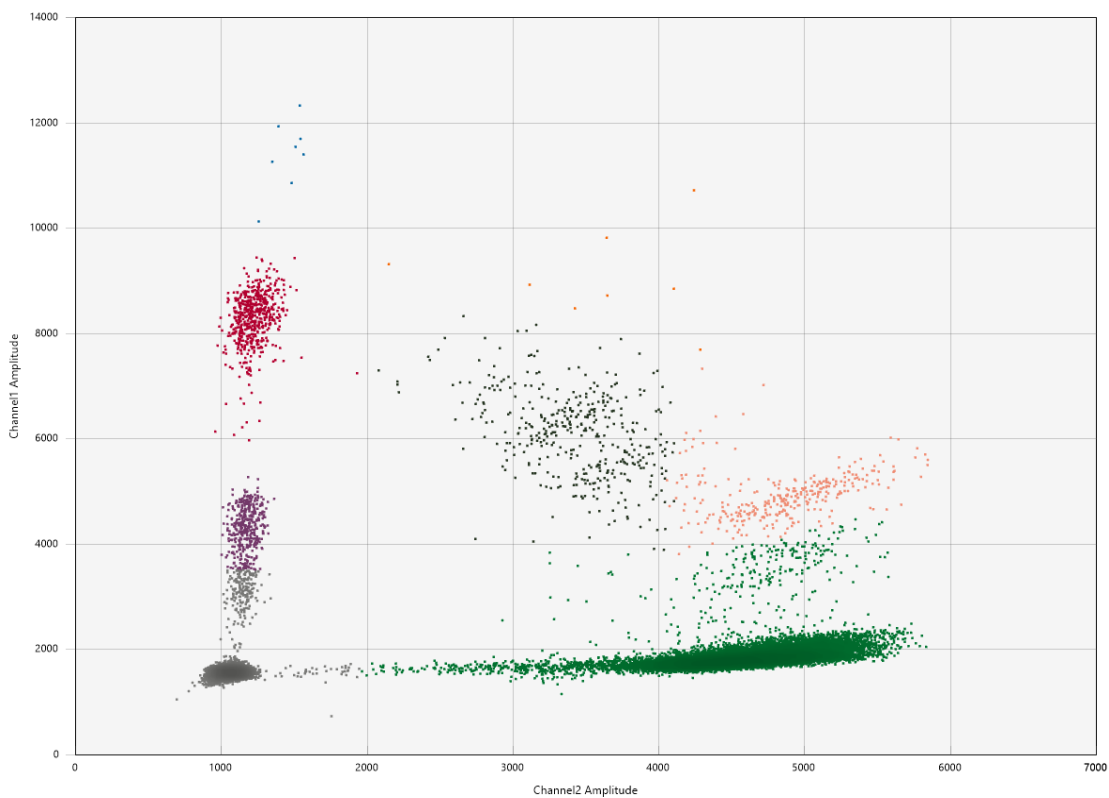

follow-up 1- 10 X dilution

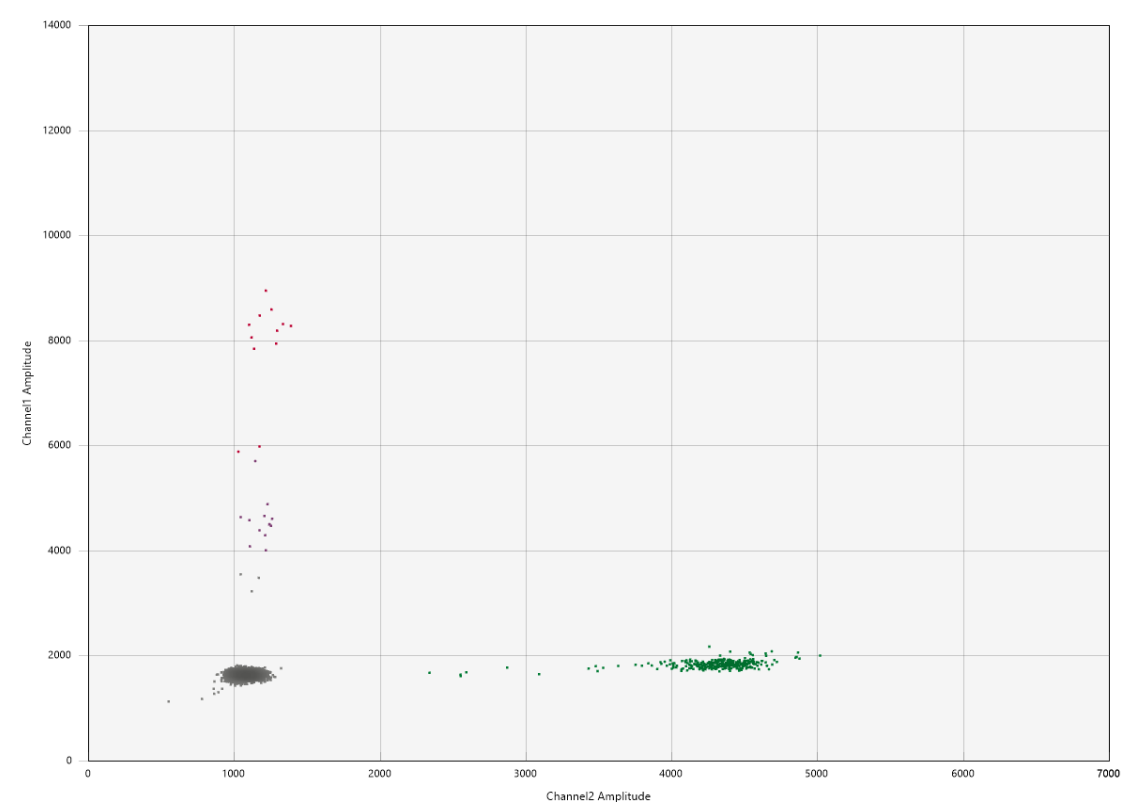

Concentration plots    Pre ,Post-surgery and Follow-up1

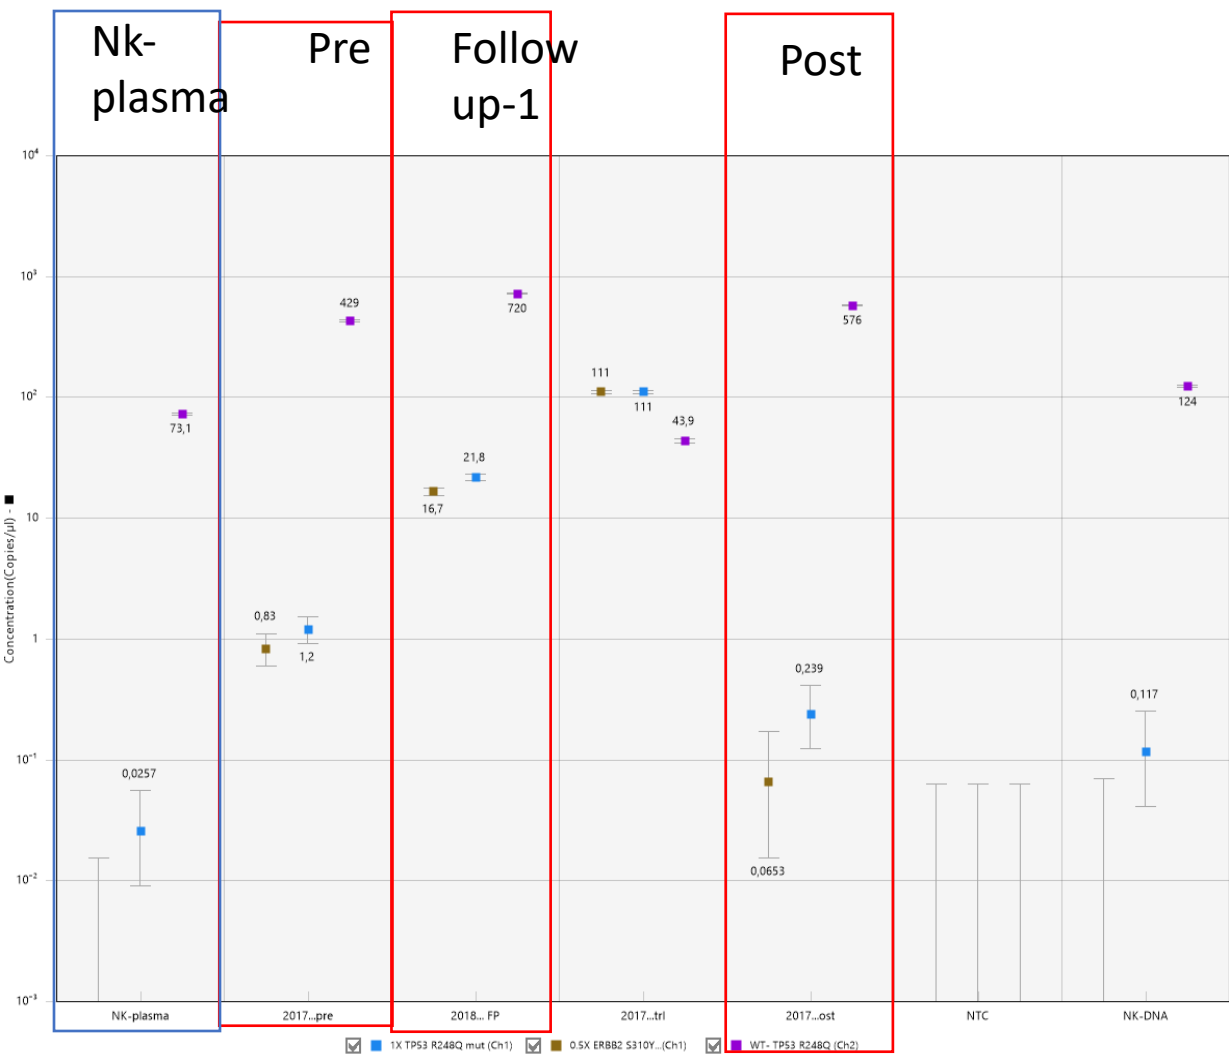

Diluted-Pre ,Post-surgery and Follow-up1

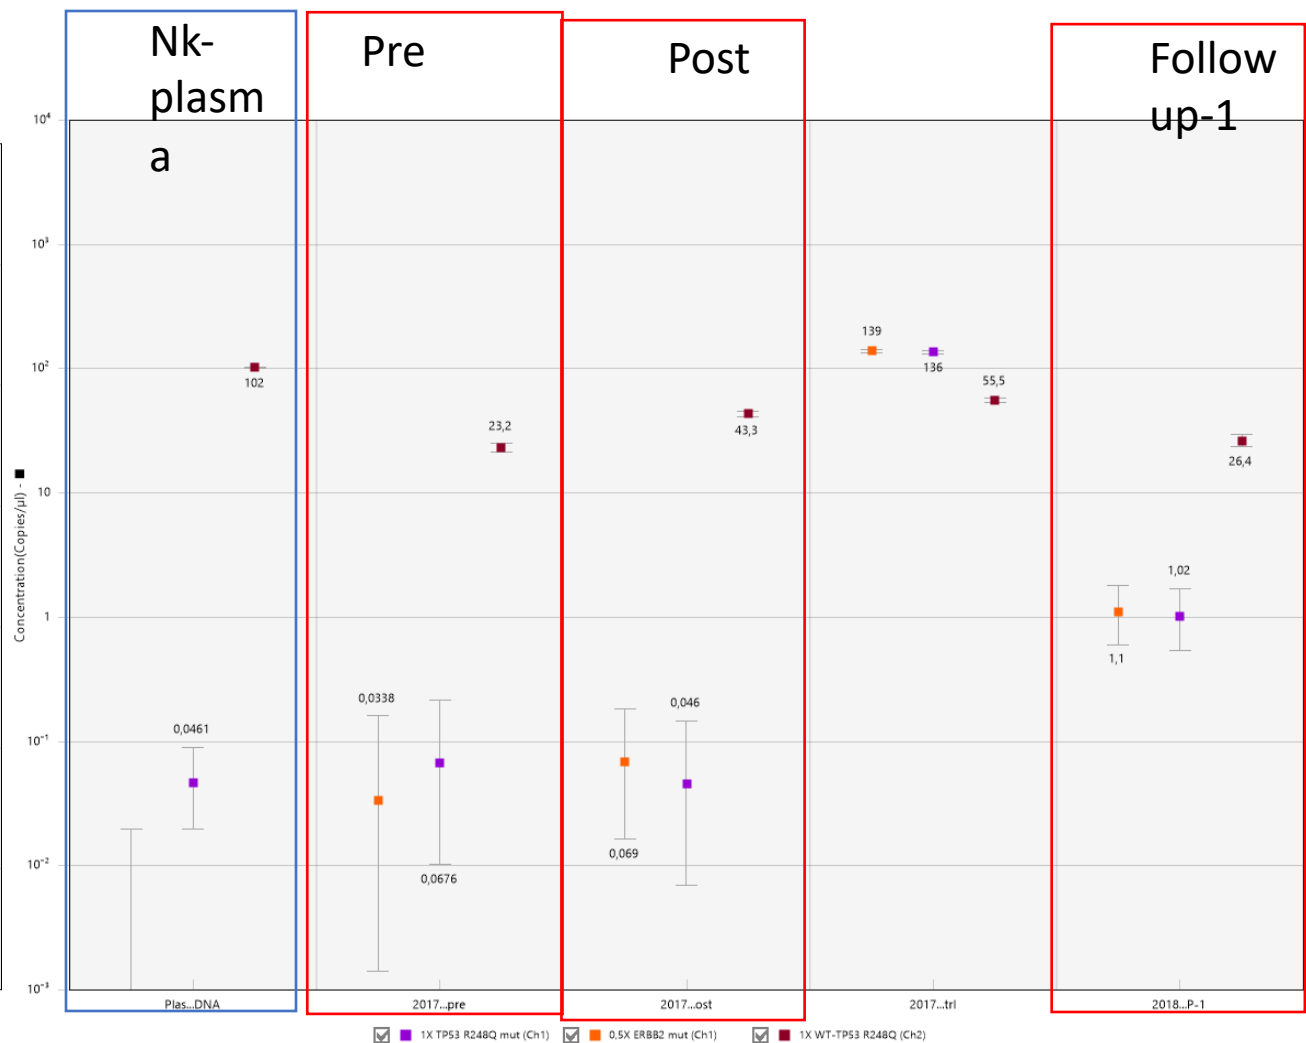

Supplement: Supplementary file 1 [file cancers-15-01160-s001.zip › Figure S6.pdf]
