# Supplementary material for: Sensitive Detection of Cell-Free Tumour DNA Using Optimised Targeted Sequencing Can Predict Prognosis in Gastro-Oesophageal Cancer
Source: Cancers (Basel). 2023 Feb 11;15(4):1160. doi: 10.3390/cancers15041160 (PMC9954085; doi:10.3390/cancers15041160)
Supplement: Supplementary file 1 [file cancers-15-01160-s001.zip › FigureS2.pdf]

## TNScope-TN (Secondrun)

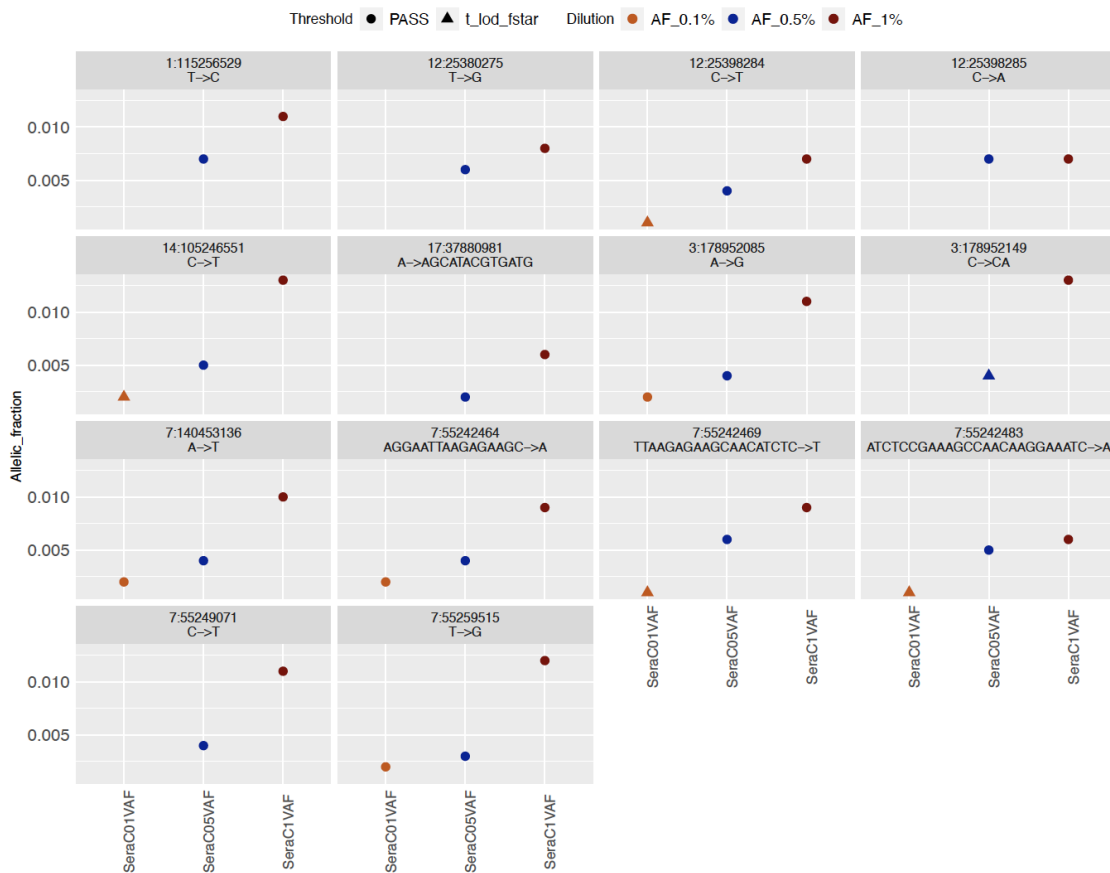

**Figure S2 – Scatter plot of technical validation of the GlcfDNA gene panel on cell free DNA from reference samples.** Scatterplot of detection of 14 reference variants with TNScope (Senteion) analysis of cfDNA sequencing aiming at 40M readpairs on SeraCare samples with VAF 0.1% (denoted SeraC01), 0.5% (denoted SeraC05) and 1% (SeraC1) run with plasma from blood donor as normal control. The default min\_tumor\_lod score was used. We could detect 4 variants at VAF 0.1%, 13 at VAF 0.5% and all 14 at 1% VAF. VAF; variant allele frequency.
