# Supplementary material for: Sensitive Detection of Cell-Free Tumour DNA Using Optimised Targeted Sequencing Can Predict Prognosis in Gastro-Oesophageal Cancer
Source: Cancers (Basel). 2023 Feb 11;15(4):1160. doi: 10.3390/cancers15041160 (PMC9954085; doi:10.3390/cancers15041160)
Supplement: Supplementary file 1 [file cancers-15-01160-s001.zip › TableS1.xlsx]

## Sheet: STable
Table S1 - GI cfDNA gene panel
GI cfDNA (gatsrointestinal cell free DNA) gene panel used for plasma targeted sequencing
Genes included (n=30) and their target regions are listed
Gene	Target regions
ACVR2A	Codon 435
AKT1	Codon 17
APC	Whole gene
ARID1A	Whole gene
BRAF	Codon 592-603
CDH1	Whole gene
CDKN2A	Codon 44, 50, 58, 80, 83, 84, 112, 153
CTNNB1	Codon 32-71, 335
EGFR	7:55155885 - 55161512; 7:55174818 - 55181412
ERBB2	Codon 310, 678, 755-759, 769, 772-775, 777-780, 842
FBXW7	Codon 465, 479, 505, 658, 667-668fs, 689
FGFR2	Codon 203, 210, 252, 253, 375, 382, 383, 549, 550, 659
GNAS	Codon 201
KMT2D	Codon 647, 2354
KRAS	Codon 12, 13, 59, 61, 146
KMT2C	Codon 2797 and 2798
MSH6	Whole gene
MYC	127736069-127736623; 127738248-127739019; 127740396-127741434
NF1	Whole gene
NRAS	Codon 12, 13, 61
PIK3CA	Codon 345, 546, 542, 545, 1047
POLD1	Codon 224, 474, 478, 987
POLE	Codon 286, 411, 424, 459, 697-699
PPP2R1A	Codon 179, 183, 256
PTEN	Whole gene
RHOA	Codon 5, 17, 34, 37, 40, 42, 47, 62, 69, 161
RNF43	Codon 659, 660, 661
SMAD4	Codon 118, 351-387, 445, 537, 538
SOX9	Whole gene
TP53	Whole gene
