# Supplementary material for: Sensitive Detection of Cell-Free Tumour DNA Using Optimised Targeted Sequencing Can Predict Prognosis in Gastro-Oesophageal Cancer
Source: Cancers (Basel). 2023 Feb 11;15(4):1160. doi: 10.3390/cancers15041160 (PMC9954085; doi:10.3390/cancers15041160)
Supplement: Supplementary file 1 [file cancers-15-01160-s001.zip › TableS2.xlsx]

## Sheet: Sheet1
Table S2 - Combined SNV and CNA study
The results from the present study compared to the previous copy number aberration (CNA) study in an overlapping cohort, using the program ichorCNA for estimating a tumour fraction.
The results from the previous study are presented in column B and D.
Participant	Detection CNV plasma (TA)*	Detection SNV plasma (TA, approach C)	Tumour fraction plasma, ichor*	Highest plasma VAF for SNVs in the present study
P01	0	0	0	NA
P02	1	2	0.08	0.02
P03	0	0	NR	NA
P04	0	0	NR	NA
P05	3	10	NR	0.03
P06	0	0	NR	NA
P08	20	4	0.04	0.03
P10	0	0	NR	NA
P11	2	0	0	NA
P13	0	0	0	NA
P14	0	0	0	NA
P15	0	2	NR	0.002
P16	0	0	NR	NA
P17	30	4	0.08	0.09
P18	0	15	0	0.008
P19	0	0	0	NA
P20	0	0	NR	NA
P21	0	0	0.05	NA
P22	0	0	NR	NA
P24	0	0	0	NA
TA; tumour-agnostic; NR; no result, SNV; single nucleotide variant; CNA; copy numver aberration
* data from Wallander et al 2020
