# Supplementary material for: Sensitive Detection of Cell-Free Tumour DNA Using Optimised Targeted Sequencing Can Predict Prognosis in Gastro-Oesophageal Cancer
Source: Cancers (Basel). 2023 Feb 11;15(4):1160. doi: 10.3390/cancers15041160 (PMC9954085; doi:10.3390/cancers15041160)
Supplement: Supplementary file 1 [file cancers-15-01160-s001.zip › TableS3.xlsx]

## Sheet: Sheet1
Table S3. Optimised ddPCR conditions for singleplex and multiplex reactions
ddPCR conditions for each assay target. All sequences are confidential. The dark probes were designed with the help of BioRad as part of a technical development collaboration.
ddPCR; digital droplet PCR, ID; identification number
Participant	ddPCR reaction	Target	Target type	BioRad Assay ID	Assay Concentration in ddPCR reaction (1X = 900nM primers/250nM probe)	Channel	Annealing temperature (℃)
P28	multiplex	TP53 p.R273H	Mutation	dHsaCP2000109	0,7X	FAM	60
		TP53 WT, p.R273H	Wild-type	Dark probe*	1x	HEX
		KRAS p.G13D	Mutation	dHsaCP2000013	0,3X	FAM
		KRAS WT p.G13D	Wild-type	dHsaCP2000014	1X	HEX
P27	multiplex	PIK3CA, p.H1047R	Mutation	dHsaCP2000077	0,5X	FAM	55
		PIK3CA WT, p.H1047R	Wild-type	dHsaCP2000078	1X	HEX
		TP53, p.R273C	Mutation	dHsaCP2500538	1X	FAM
		TP53 WT, p.R273C	Wild-type	Dark probe*	1x	HEX
P43	singleplex	KRAS, p.G12D	Mutation	#1863506	1X	FAM	60
		KRAS WT, p.G12D	Wild-type	#1863506	1X	HEX
P38	singleplex	TP53, p.R248W	Mutation	dHsaMDV2010107	1X	FAM	60
		TP53 WT, p.R248W	Wild-type	dHsaMDV2010107	1X	HEX
P42	singleplex	TP53,p.R158fs*12​, c.472del	Mutation	dHsaMDS851691356	1X	FAM	55
		TP53 WT,p.R158fs*12​	Wild-type	dHsaMDS851691356	1X	HEX
P32	singleplex	TP53 p.R248W	Mutation	dHsaMDV2010107	1X	FAM	55
		TP53 WT p.R248W	Wild-type	dHsaMDV2010107	1X	HEX
P44	multiplex	TP53,p.R273H	Mutation	dHsaCP2000109	0,7X	FAM	60
		TP53 WT, p.R273H	Wild-type	Dark probe*	1x	HEX
		KRAS,p.G13D	Mutation	dHsaCP2000013	0,3X	FAM
		KRAS WT,p.G13D	Wild-type	dHsaCP2000014	1X	HEX
P23	multiplex	TP53,p.R273H	Mutation	dHsaCP2000109	0,7X	FAM	60
		TP53 WT, p.R273H	Wild-type	Dark probe*	1x	HEX
		KRAS,p.G13D	Mutation	dHsaCP2000013	0,3X	FAM
		KRAS WT,p.G13D	Wild-type	dHsaCP2000014	1X	HEX
P12	multiplex	APC, p. R823*	Mutation	dHsaMDM1477572101	1X	FAM	60
		TP53,c.720_766del	Mutation	Customised in IDT	0,5X	FAM
		APC WT, p. R823*	Wild-type	dHsaMDW1477572103	1X	HEX
P41	multiplex	RB1, p.R358*	Mutation	dHsaIS2501212	1X	FAM	55
		RB1 WT, p.R358*	Wild-type	dHsaIS2501213	1X	HEX
		TP53,p.R273C	Mutation	dHsaCP2500538	0,5X	FAM
		TP53 WT,p.R273C	Wild-type	Dark probe*	1x	HEX
P25	singleplex	TP53,p.R196*	Mutation	dHsaMDV2010121	1X	FAM	55
		TP53 WT,p.R196*	Wild-type	dHsaMDV2010121	1X	HEX
P15	multiplex	TP53,p.R248Q	Mutation	dHsaCP2000127	1X	FAM	55
		TP53 WT,p.R248Q	Wild-type	dHsaCP2000128	1X	HEX
		ERBB2,p.S310Y,	Mutation	dHsaMDM4919721961	0,5X	FAM
		ERBB2 WT,p.S310Y,	Wild-type	Dark probe*	1x	HEX
