# Supplementary material for: Sensitive Detection of Cell-Free Tumour DNA Using Optimised Targeted Sequencing Can Predict Prognosis in Gastro-Oesophageal Cancer
Source: Cancers (Basel). 2023 Feb 11;15(4):1160. doi: 10.3390/cancers15041160 (PMC9954085; doi:10.3390/cancers15041160)
Supplement: Supplementary file 1 [file cancers-15-01160-s001.zip › TableS4.xlsx]

## Sheet: Sheet1
Table S4 - Demography
Clinical information about the included participants.
*as reported by the Pathology department, Karolinska University Hospital, Stockholm, Sweden. Analysis performed on clinical tumour tissue sample.
** Highest CRP measurement during inpatient care after gastric surgery, as reported by the Clinical chemistry department, Karolinska University Hospital, Stockholm, Sweden
TNM; international tumour stage classification according to tumour, lymph node metastases, and distant metastases.
HT; hypertension, Neg; negative, Pos; positive, COPD; chronic obstructive pulmonary disease, DM; diabetes mellitus
chemo; chemotherapy, RT; radiation therapy
Resections: S/O; stomach/oesophagus, L; liver, P; pancreas, D; duodenal
EXP; explorative laparotomy
M; metastasis at time of surgery
Participant ID	Cancer localisation		Co-morbidity	Sex	cTNM	Tumor size [cm]	Tumour stage (based on pathology report*)	pTNM*	Resection type	Chemotherapy	Radiotherapy	Complications during surgery	Inpatient care duration after surgery	CRPmax** during inpatient care	Age death	Overall survival [years]	Alive at the end of study	Progression free survival [years]	Progression?
P01	Stomach	71	HT, DM	Man	TXN0M0	16 x 12	IIIC	pT4aN3bL1V1Pn1R0	S/O	No chemo	No RT	Infection	10	151	72	1.31111	no	0.872222	yes
P02	Stomach	84	HT, DM	Man	T4aN0M0	10 x 5 x 3	IIB	L0V0Pn0R0	S/O	No chemo	No RT	Infection	16	160	NA	5.41111	yes	5.3	no
P03	Stomach	79		Man	TXN0M0	2,5 x 2,5 x 0,6	IIB	pT3N1L1V0Pn1R0	S/O	No chemo	No RT	Ileus	48	300	NA	5.41389	yes	5.225	no
P04	Stomach	79	HT, kidney failure	Man	TXN0MX	1,5 x 1	IB	pT2N0MxL1V1Pn1R0	S/O	No chemo	No RT	Anastomosis leakage, abscess	10	143	NA	5.39444	yes	5.20556	no
P05	Stomach	78	TIA	Man	T3N1M0	5.5	IIIC	pT4bN3aLV1Pn0R0	P	No chemo	No RT	Gall bladder leakage, respiratory failure	47	307	79	0.747222	no	0.377778	yes
P06	Stomach	78	HT, DM, atrial fibrillation	Man	T3-4aN0M0	4 x 1	IIIC	pT4aN3bL1V1Pn1	S/O	No chemo	No RT	Colangitis	14	251	78	0.902778	no	0.336111	yes
P07	Stomach	74	Stroke, atherosclerosis	Man	T2N0M0	5 x 3,5 x 2,5	IIA	pT3N0V1L0Pn1R0	S/O	No chemo	No RT	Infection	8	132	75	1.81111	no	1.59444	yes
P08	Stomach	64		Man	T4aN0M0		IB	ypT2N0L0V0Pn0	S/O	Neo EOX	No RT		7	113	68	4.34167	no	4.61944	no
P09	Stomach	59	Reumatism	Woman	TXN0M0	Whole ventricle	IIIC	pT4aN3bL1V1Pn1	S/O	No chemo	No RT		8	132	61	1.40278	no	M	NA
P10	Stomach	55	DM, arrhythmia	Man	T3N1-2M0		IB	pT1bN1V0L1	S/O	Neo and adjuvant Cap-Epi-Oxa	No RT		6	179	NA	5.02222	yes	4.60278	no
P11	Oesophagus	75	Colon cancer, stroke	Man	TXN0M0	>5 x 1,4	IIIC	pT4bN1cL1V0Pn1	S/O, L	No chemo	No RT	Stroke	10	189	76	0.986111	no	4.475	no
P12	Stomach	65	HT	Woman	T3N2M0	5	IIIC	pT4bN3bL1V1Pn1R1	S/O, P	No chemo	No RT	Infection	24	303	66	0.805556	no	M	NA
P13	Stomach	75	Stroke, hypothyreosis	Woman	T2/T3N0M0	4 x 3 x 0,7	IA	pT1bN0L0V0Pn0R0	S/O	No chemo	No RT	Infection	5	275	NA	4.62222	yes	4.40278	no
P14	Stomach	57		Woman	T1aN0M0	5	IA	pT1aN0R0-1	S/O	No chemo	No RT	Abscess	8	192	NA	4.83611	yes	4.4	no
P15	Stomach	74	HT, stroke	Man	T4N0-1M0-1	7 x 4,5 x 4	IIIC	pT4bN3aL1V1R0-1	S/O	No chemo	No RT	Anastomosis leakage, atrial fibrillation	8	272	75	0.791667	no	M	NA
P16	Stomach	68	Breast cancer	Woman	T2N0M0		IB	pT2N0L/V1Pn0	S/O	Neo Cap-Oxa	No RT	Infection	13	320	NA	4.71944	yes	4.35556	no
P17	Oesophagus	56	HT	Woman	T4aN3M0	15	IV	ypT3N1M1	S/O	Neo doc-oxa-flu	No RT	Anastomosis leakage	13	293	57	0.991667	no	0.258333	yes
P18	Stomach	71		Man	T4aN1M0	0	IIA	pT3N0M0R0	S/O	Neo and adjuvant FLOT	No RT	Infection	9	337	NA	4.32222	yes	3.93056	no
P19	Stomach	77	HT, atrial fibrillation	Woman	T2-T3N0M0	3,5 x 3 x 3	IIB	pT3N1L0V0Pn1	S/O	No chemo	No RT		8	141	NA	4.28056	yes	4.16667	no
P20	Stomach	43	DM	Man	T3N0-2M0	5,5 x 2,5	IIB	pT3N1L1V0R0	S/O	Neo and adjuvant Doc-Oxa-Flu	No RT	Infection	12	387	NA	4.475	yes	4.09722	no
P21	Stomach	76	Prostate cancer	Man	T3N1M0	5 x 5 x 4,5	IIIC	pT4aN3aL1V1Pn1R0	S/O	No chemo	No RT	Multi organ failure	30	377	76	0.216667	no	M	NA
P22	Oesophagus	48		Man	T3N2M0		IIIC	ypT3N3L1V1R0	S/O	Neo and adjuvant Pak+Kar, Cap-Iri	Neo and after surgery	Respiratory failure	10	234	50	1.825	no	0.380556	yes
P23	Stomach	75	DM, HT, kidney failure	Man	TXN0M0	2,5 x 1,5 x 0,8	IIA	pT2N1R0	S/O	No chemo	No RT	Anastomosis leakage	66	407	NA	4.10556	yes	3.975	no
P24	Stomach	85	Urinary bladder cancer	Man	T2-3N0M0	4 x 1,5	IIIC	pT4aN3bL1V0/EMV1Pn1R0	S/O	Adjuvant T Teysuno	No RT		7	217	86	1.71389	no	0.936111	yes
P25	Stomach	76	HT	Man	T4aN0-N1M0	9 x 1,5	IIIC	pT4aN3bL1V1Pn1	S/O	No chemo	No RT		10	193	77	0.741667	no	0.422222	yes
P26	Stomach	68	DM, HT	Man	T3/T4aN0/1M0	NA	IV	No complete report, spread disease	Biopsy	No chemo	No RT		4	72	69	0.45	no	M	NA
P27	Stomach	81	Kidney failure, atherosclerosis, HT	Man	T3N2M0	6 x 7 x 1	IIIB	pT3N3bMx L1V1Pn1	S/O	No chemo	No RT		7	191	82	0.880556	no	0.713889	yes
P28	Oesophagus	81		Woman	T4aN0M0	6.8	IIIC	pT3N1L1V1Pn1	S/O	No chemo	No RT	Anastomosis leakage	58	328	NA	3.66111	yes	3.55556	no
P29	Stomach	74	COPD, HT, heart infarction	Woman	T4aN2M0	3,5 x 2 x 2,5	IIIC	pT4aN3a	S/O	No chemo	No RT		5	64	75	1.04722	no	0.158333	yes
P30	Oesophagus	67	Hep C, porphyria	Man	T3N1M0-1	5 x 2	IIIC	pT3N3L1V1Pn1R0-1	S/O, L	Neo Oxa-Flo calciumfolinate	No RT	Infection, respiratory failure	21	176	69	1.02222	no	0.219444	yes
P31	Oesophagus	74	COPD, HT	Woman	T3N2M0		IIIC	pT3N3L1V1Pn1	S/O	Neo and adjuvant Kar+Pak	Adjuvant to chemo	Anastomosis leakage, embolism, atrial fibrillation	23	199	74	0.875	no	M	NA
P32	Stomach	80	NET, urinary cancer	Man	TXN2M0	1 x 1,4 x 0,3	IA	pT1aN0	S/O	No chemo	Prostate cancer --> RT, brachy		11	187	NA	3.79444	yes	3.35833	no
P33	Oesophagus	77	Atrial fibrillation, HT, sarcoidosis	Man	T3N3M0	5 x 2,4	IIIA	pT2N2L1V1	S/O	No chemo	No RT	Infection, atrial fibrillation, heart failure	32	319	NA	2.80556	yes	2.72778	no
P34	Stomach	36		Woman	T3N1-3M0	5 x 6 x 2,5	IIIC	pT4bN3aV1Pn1R0-1	S/O	Neo and adjuvant Doc-Oxa	No RT		7	105	NA	3.00833	yes	2.62778	no
P35	Stomach	64	HT	Man	T3N0M0	3 x 3 x 2	IIIB	pT4bN0M0R0	S/O, P, D	Neo and adjuvant Doc-Oxa-Flu-Calciumfolinate	No RT	Anastomosis leakage	20	302	NA	2.62778	yes	1.18333	yes
P36	Stomach	62	HT, thrombocytosis	Woman	T4aN0M0	NA	IV	No complete report	EXP	Neo FLOT, adjuvant Iri-Flv-mdg	No RT		8	12	64	2.30556	no	M	NA
P37	Stomach	81	HT, stroke	Woman	TXN0-1M0	1 x 3	IB	pT2N0L/V0Pn0R0	S/O	No chemo	No RT		6	102	81	0.713889	no	2.30278	no
P38	Stomach	77	Colon cancer, HT, DM	Woman	TXN1M0	5 x 5,5 x 0,8	IIA	pT3N0R0	S/O	No chemo	No RT		9	198	NA	2.36944	yes	2.28333	no
P39	Oesophagus	61		Man	T3NXM0	2	IIA	pT2N0L0V0Pn0R0	S/O	Neo Doc-Oxa-Flu	No RT	Anastomosis leakage, atrial fibrillation	23	358	NA	2.49444	yes	2.21667	no
P40	Stomach	72	Atrial fibrillation, HT, DM	Man	T3N0M0	4,5 x 2,5 x 0,8	IB	pT2N0R0	S/O	No chemo	No RT	Infection	18	332	NA	2.3	yes	2.18889	no
P41	Stomach	87	COPD, atrial fribrillation	Man	T4aN3M0	12 x 7	IIIC	pT4aN3L1V1Pn1R1	S/O	Neo Doc-Oxa-Flu, adjuvant Iri+Flv+calciumfolinate	No RT	Anastomosis leakage, embolism	16	184	88	0.572222	no	0.383333	yes
P42	Stomach	61	HT	Man	TXN0M0	2 x 2,5 x 0,5	IA	pT1bSM1N0R0	S/O	No chemo	No RT	Infection	7	141	NA	2.30556	yes	2.16944	no
P43	Stomach	79	Atrial fribrillation, HT, atherosclerosis	Man	T3N0M0	3 x 2,2 x 2	IIIC	pT4aN3aR0	S/O	No chemo	No RT	Atrial fibrillation	8	75	81	1.51944	no	0.436111	yes
P44	Oesophagus	83	Prostate cancer, stroke, HT	Woman	T3N1M0	6 x 3	IIIA	No complete report, based on clincal stage	S/O	No chemo	No RT	Embolism, atrial fibrillation	15	202	84	0.552778	no	0.311111	yes
P45	Oesophagus	72	HT	Man	T3N0M0	2	IA	pT1bN0L0V0Pn0R0	S/O	Neo and adjuvant Doc-Oxa-Flo-Calciumfolinat	No RT		9	151	NA	2.35833	yes	2.07778	no
P46	Stomach	64		Man	T2N0M0	0,6 x 0,5 x 0,3 mm	IB	pT1bN1L0V0Pn0R0	S/O	Neo and adjuvant Doc-Oxa-Flu	No RT		9	223	NA	2.39167	yes	2.06111	no
P47	Stomach	82	Breast cancer, HT	Woman	T3N2M0		IIIA	pT2N3aL1V1Pn0R0	S/O	No chemo	No RT		8	126	84	1.29722	no	1.05278	yes
