# Supplementary material for: Sensitive Detection of Cell-Free Tumour DNA Using Optimised Targeted Sequencing Can Predict Prognosis in Gastro-Oesophageal Cancer
Source: Cancers (Basel). 2023 Feb 11;15(4):1160. doi: 10.3390/cancers15041160 (PMC9954085; doi:10.3390/cancers15041160)
Supplement: Supplementary file 1 [file cancers-15-01160-s001.zip › TableS6.xlsx]

## Sheet: Sheet1
Table S6 - Variant filtering in approach C
Number of variants excluded for each patient divided by exclusion reason in approach C (as nominated by Figure 2)
SNV; single nucleotide variant, COSMIC; catalogue of somatic mutations in cancer
ID	# SNVs after filtering	Left after filtration gnomad 1% and exonic/splicing	Blacklist artefact filtration removal	Technical artifacts filtration removal	Manual filtration not cancer-driver (synonymous, inframe, not reported in COSMIC, germline, benign in ClinVar)
P01	1	31	25	1	4
P02	2	28	24	2	0
P03	0	38	32	0	6
P04	4	48	37	2	5
P05	10	37	23	3	1
P06	0	11	10	0	1
P07	2	36	33	0	1
P08	4	39	32	0	3
P09	1	21	17	2	1
P10	0	23	20	0	3
P11	0	9	6	2	1
P12	4	37	29	1	3
P13	0	37	31	0	6
P14	0	30	28	0	2
P15	2	27	23	0	2
P16	2	46	39	0	5
P17	4	45	35	1	5
P18	15	50	21	3	11
P19	0	14	14	0	0
P20	0	37	34	1	2
P21	0	32	28	1	3
P22	0	53	43	1	9
P23	1	30	27	0	2
P24	0	13	13	0	0
P25	1	28	25	0	2
P26	0	15	11	0	4
P27	3	16	13	0	0
P28	3	30	27	0	0
P29	0	22	21	0	1
P30	3	40	34	0	3
P31	1	35	28	2	4
P32	0	28	28	0	0
P33	2	26	21	0	3
P34	0	48	41	2	5
P35	0	24	23	0	1
P36	NA	NA	NA	NA	NA
P37	0	22	21	0	1
P38	2	31	25	1	3
P39	1	30	22	0	7
P40	0	41	34	0	7
P41	2	50	35	2	11
P42	NA	NA	NA	NA	NA
P43	4	23	15	0	4
P44	1	9	8	0	0
P45	NA	NA	NA	NA	NA
P46	1	53	38	7	7
P47	1	33	29	0	3
Sum	77	1376	1123	34	142
