# Supplementary material for: Sensitive Detection of Cell-Free Tumour DNA Using Optimised Targeted Sequencing Can Predict Prognosis in Gastro-Oesophageal Cancer
Source: Cancers (Basel). 2023 Feb 11;15(4):1160. doi: 10.3390/cancers15041160 (PMC9954085; doi:10.3390/cancers15041160)
Supplement: Supplementary file 1 [file cancers-15-01160-s001.zip › TableS7.xlsx]

## Sheet: Sheet1
Table S7 - Plasma variants
All potentially cancer-associated variants in plasma passing filtering criteria
Pre; diagnostic plasma sample, post; plasma sampled after surgery, HGNC; HUGO gene nomenclature committee; VAF; variant allele frequency, HGVS; human genome variation society, N; no, Y; yes, CH; clonal haematopoiesis
GEACII ID	Pre/post	Chromosome	Position	Change	Position_Change	HGNC_id	Gene_name	Canonical_transcript/HGVS/protein_change	Allele frequency_reference	Allele frequency_alternate	VAF in either approach A or C	Hotspot variant?	Pathogenic in ClinVar?	Present in tissue from same participant?	Detected in approach A?	Detected in approach B?	Detected in approach C?	Detected in approach D (= not CH)	Detected in approach E?	VAF tissue
P01	Pre	17	7577114	C>G	7577114_C>G	11998	TP53	NM_000546/c.824G>C/p.Cys275Ser	3320	5	0.00150376	N	Y	N	N	N	Y	Y (no WBC, not in post-surgical sample)	No analysis
P02	Pre	17	29559090	G>A	29559090_G>A	7765	NF1	NM_001042492/c.3198-1G>A/-	666	15	0.0220264	N	N	N	N	N	Y	N (removed by WBC)	N
P02	Pre	17	7578526	C>T	7578526_C>T	11998	TP53	NM_000546/c.404G>A/p.Cys135Tyr	894	5	0.00556174	Y	Y	Y	Y	Y	Y	Y	Y	7
P04	Pre	5	112170764	T>TACTTACCGGAGCCAGACAAA	112170764_T>TACTTACCGGAGCCAGACAAA	583	APC	XM_005271976/c.1861_1880dup/p.Asn627LysfsTer10	2198	4	0.00181653	N	N	N	N	N	Y	Y (no WBC, not in post-surgical sample)	No analysis
P04	Pre	18	48575150	G>T	48575150_G>T	6770	SMAD4	NM_005359/c.344G>T/p.Cys115Phe	2301	6	0.00260078	N	N	N	N	N	Y	Y (no WBC, not in post-surgical sample)	No analysis
P04	Pre	17	29422338	A>C	29422338_A>C	7765 | 41638	NF1 | MIR4733	NM_001042492/c.11A>C/p.His4Pro | NR_039886/-/-	1661	7	0.00419664	N	N	N	N	N	Y	Y (no WBC, not in post-surgical sample)	No analysis
P04	Pre	18	48575077	C>A	48575077_C>A	6770	SMAD4	NM_005359/c.271C>A/p.Pro91Thr	1383	8	0.00575126	N	N	N	N	N	Y	Y (no WBC, not in post-surgical sample)	No analysis
P05	Pre	16	68842438	G>C	68842438_G>C	1748	CDH1	NM_004360/c.499G>C/p.Glu167Gln	2490	4	0.00160385	N	N	N	N	N	Y	Y	N 35 re-ocurrences
P05	Pre	16	68846057	T>C	68846057_T>C	1748	CDH1	NM_004360/c.1028T>C/p.Leu343Pro	2295	24	0.0103493	N	N	Y	Y	Y	Y	N (post-op ratio<4)	Y	20
P05	Pre	10	89717608	A>G	89717608_A>G	9588	PTEN	NM_000314/c.635-2A>G/-	1622	19	0.0115783	N	Y	Y	Y	Y	Y	Y	Y	19
P05	Pre	10	89720811	C>CA	89720811_C>CA	9588	PTEN	NM_000314/c.968dup/p.Asn323LysfsTer2	1691	21	0.0122664	N	Y	Y	Y	Y	Y	Y	Y	18
P05	Pre	16	68849663	G>A	68849663_G>A	1748	CDH1	NM_004360/c.1565+1G>A/-	1457	19	0.0128726	N	Y	Y	Y	Y	Y	Y	Y	20
P05	Pre	17	7577588	G>T	7577588_G>T	11998	TP53	NM_000546/c.693C>A/p.Thr231%3D	1981	27	0.0134462	N	N	Y	Y	Y	Y	Y	Y	21
P05	Pre	1	27105922	C>T	27105922_C>T	11110	ARID1A	NM_006015/c.5533C>T/p.Arg1845Trp	2029	31	0.0150485	N	N	Y	Y	Y	Y	N (post-op ratio<4)	Y	20
P05	Pre	20	57484420	C>T	57484420_C>T	4392	GNAS	NM_001077490/c.2530C>T/p.Arg844Cys	1874	37	0.0193616	Y	Y	Y	Y	Y	Y	Y	Y	20
P05	Pre	4	153244155	TC>T	153244155_TC>T	16712	FBXW7	NM_033632/c.2001del/p.Ser668ValfsTer39	3203	65	0.0198898	N	N	Y	Y	Y	Y	Y (post-op ratio>4)	N not PASS, in normal	18
P05	Pre	17	56435160	AC>A	56435160_AC>A	18505 | 44148 | 11467	RNF43 | TSPOAP1-AS1 | SUPT4H1	NM_017763/c.1976del/p.Gly659ValfsTer41 | NR_038410/-/-	2402	74	0.0298869	Y	N	Y	Y	Y	Y	N (post-op ratio<4)	N not PASS, in normal	42
P07	Pre	17	7579329	T>C	7579329_T>C	11998	TP53	NM_000546/c.358A>G/p.Lys120Glu	3815	5	0.0013089	Y	Y	Y	Y	Y	Y	Y	N not PASS	19
P07	Pre	17	7578515	T>C	7578515_T>C	11998	TP53	NM_000546/c.415A>G/p.Lys139Glu	4380	4	0.000912409	N	N	N	N	N	Y	Y	N
P08	Pre	7	55259572	G>A	55259572_G>A	3236 | 40207	EGFR | EGFR-AS1	NM_005228/c.2625+5G>A/- | NR_047551/-/-	7619	8	0.00104891	N	N	N	N	N	Y	Y	Y
P08	Pre	7	55242419	T>A	55242419_T>A	3236	EGFR	NM_005228/c.2189T>A/p.Leu730His	11155	31	0.00277132	N	N	N	N	N	Y	Y	Y
P08	Pre	5	112176087	C>G	112176087_C>G	583	APC	XM_005271976/c.4796C>G/p.Ser1599Ter	1786	8	0.00445931	N	Y	Y	Y	Y	Y	Y	Y	46
P08	Pre	16	68847403	G>T	68847403_G>T	1748	CDH1	NM_004360/c.1320+5G>T/-	2160	57	0.0257104	N	N	Y	Y	Y	Y	Y	Y	62
P09	Pre	16	68842726	A>G	68842726_A>G	1748	CDH1	NM_004360/c.662A>G/p.Asp221Gly	2605	6	0.00229797	N	N	N (below threshold)	N	N	Y	Y	Y	1
P12	Pre	17	7577514	GTGATGATGGTGAGGATGGGCCTCCGGTTCATGCCGCCCATGCAGGAA>G	7577514_GTGATGATGGTGAGGATGGGCCTCCGGTTCATGCCGCCCATGCAGGAA>G	11998	TP53	NM_000546/c.720_766del/p.Ser241ThrfsTer7	1939	6	0.00308483	N	N	Y	Y	Y	Y	Y	Y	18
P12	Pre	3	41266113	C>T	41266113_C>T	2514	CTNNB1	NM_001904/c.110C>T/p.Ser37Phe	1907	10	0.00521648	Y	Y	N	N	N	Y	Y	Y
P12	Pre	5	112173704	C>T	112173704_C>T	583	APC	XM_005271976/c.2413C>T/p.Arg805Ter	1244	9	0.00718276	Y	Y	Y	Y	Y	Y	Y	Y	10
P12	Pre	17	70120427	TAC>T	70120427_TAC>T	11204 | 49321	SOX9 | SOX9-AS1	NM_000346/c.1432_1433del/p.Thr478ProfsTer99	2585	33	0.012605	N	N	Y	Y	Y	Y	Y	Y	15
P15	Pre	1	27099098	C>T	27099098_C>T	11110	ARID1A	NM_006015/c.3514C>T/p.Gln1172Ter	1545	3	0.00193798	N	N	Y	Y	Y	Y	Y	N	31
P15	Pre	17	7577538	C>T	7577538_C>T	11998	TP53	NM_000546/c.743G>A/p.Arg248Gln	1307	3	0.00229008	Y	Y	Y	Y	Y	Y	Y	Y but 7 repeats	68
P15	Pre	4	153244137	G>A	153244137_G>A	NM_033632	FBXW7	NM_033632:c.2020C>T,p.Arg674Trp			NA	N?	N?	Y	N	Y	N	N (not in C)	N not PASS	28
P16	Pre	17	70119806	T>A	70119806_T>A	11204 | 49321	SOX9 | SOX9-AS1	NM_000346/c.808T>A/p.Phe270Ile	2890	5	0.00172712	N	N	N	N	N	Y	Y (no WBC, not in post-surgical sample)	No analysis
P16	Pre	12	133249796	G>A	133249796_G>A	9177	POLE	NM_006231/c.1427C>T/p.Pro476Leu	2154	49	0.0222424	N	N	N	N	N	Y	N (no WBC, CHIP based on post-surgical sample)	No analysis
P17	Pre	3	41266097	G>T	41266097_G>T	2514	CTNNB1	NM_001904/c.94G>T/p.Asp32Tyr	3022	7	0.00231099	N	Y	N	N	N	Y	Y	N not PASS
P17	Pre	8	128750604	CCAG>C	128750604_CCAG>C	7553 | 48939	MYC | CASC11	NM_002467/c.154_156del/p.Gln52del	2021	12	0.00590261	N	N	N	N	N	Y	N (removed by WBC)	N not PASS, in normal	1
P17	Pre	12	25398284	C>A	25398284_C>A	6407	KRAS	NM_033360/c.35G>T/p.Gly12Val	2157	76	0.0340349	Y	Y	Y	Y	Y	Y	Y	Y (post-op ratio>4)	13
P17	Pre	17	7578443	A>C	7578443_A>C	11998	TP53	NM_000546/c.487T>G/p.Tyr163Asp	3235	317	0.0892455	Y	Y	Y	Y	Y	Y	Y	Y (post-op ratio>4)	42
P18	Pre	1	27058036	C>T	27058036_C>T	11110	ARID1A	NM_006015/c.1744C>T/p.Pro582Ser	1315	3	0.00227618	N	N	Y	Y	Y	Y	Y	N only 5 reads	12
P18	Pre	12	133250213	G>C	133250213_G>C	9177	POLE	NM_006231/c.1307C>G/p.Pro436Arg	1038	3	0.00288184	N	N	Y	Y	Y	Y	Y	Y	11
P18	Pre	5	112177901	C>T	112177901_C>T	583	APC	NM_000038/c.6610C>T/p.Arg2204Ter	1367	4	0.00291758	Y	Y	Y	Y	Y	Y	Y	Y	11
P18	Pre	5	112175050	T>G	112175050_T>G	583	APC	NM_000038/c.3759T>G/p.Ser1253%3D	1283	4	0.003108	N	N	Y	Y	Y	Y	Y	N only 3 reads in tumour	12
P18	Pre	5	112177368	C>A	112177368_C>A	583	APC	NM_000038/c.6077C>A/p.Ser2026Tyr	1509	6	0.0039604	N	N	Y	Y	Y	Y	Y	N not PASS	14
P18	Pre	5	112178211	C>T	112178211_C>T	583	APC	NM_000038/c.6920C>T/p.Ser2307Leu	1587	7	0.00439147	N	N	Y	Y	Y	Y	Y	Y	12
P18	Pre	3	178952018	A>G	178952018_A>G	8975	PIK3CA	NM_006218/c.3073A>G/p.Thr1025Ala	1039	5	0.00478927	Y	Y	Y	Y	Y	Y	Y	Y	10
P18	Pre	1	27106354	C>T	27106354_C>T	11110	ARID1A	NM_006015/c.5965C>T/p.Arg1989Ter	1121	6	0.00532387	Y	Y	Y	Y	Y	Y	Y	Y	12
P18	Pre	5	112173917	C>T	112173917_C>T	583	APC	NM_000038/c.2626C>T/p.Arg876Ter	1485	8	0.00535834	N	Y	Y	Y	Y	Y	Y	Y	11
P18	Pre	7	55242456	C>T	55242456_C>T	3236 | 40207	EGFR | EGFR-AS1	NM_005228/c.2226C>T/p.Val742%3D | NR_047551/-/-	1467	8	0.00542373	N	N	Y	Y	Y	Y	Y	Y	10
P18	Pre	2	48026458	G>T	48026458_G>T	7329 | 13590 | 36648	MSH6 | FBXO11 | RPL36AP15	NM_000179/c.1336G>T/p.Glu446Ter	1389	8	0.00572656	N	N	Y	Y	Y	Y	Y	Y	12
P18	Pre	18	48575206	G>A	48575206_G>A	6770	SMAD4	NM_005359/c.400G>A/p.Glu134Lys	1116	7	0.0062333	N	N	Y	Y	Y	Y	Y	Y	9
P18	Pre	12	133250243	G>A	133250243_G>A	9177	POLE	NM_006231/c.1277C>T/p.Ala426Val	1208	8	0.00657895	N	N	Y	Y	Y	Y	Y	N not PASS	10
P18	Pre	5	112176051	C>A	112176051_C>A	583	APC	NM_000038/c.4760C>A/p.Ser1587Ter	1290	9	0.00692841	N	N	Y	Y	Y	Y	Y	Y	11
P18	Pre	17	7578194	G>A	7578194_G>A	11998	TP53	NM_000546/c.655C>T/p.Pro219Ser	1359	11	0.0080292	N	Y	Y	Y	Y	Y	Y	Y	10
P21	Pre	9	21971111	G>A	21971111_G>A	NM_000077.4	CDKN2A	NM_001195132.1:c.247C>T,p.His83Tyr			NA	N?	N?	Y	N	Y	N	N (not in C)	No analysis	19
P23	Pre	8	128750604	CCAG>C	128750604_CCAG>C	7553 | 48939	MYC | CASC11	NM_002467/c.154_156del/p.Gln52del	534	15	0.0273224	N	N	N	N	N	Y	Y (no WBC, not in post-surgical sample)	No analysis
P25	Pre	17	7578263	G>A	7578263_G>A	11998	TP53	NM_000546/c.586C>T/p.Arg196Ter	6971	5	0.000716743	Y	Y	Y	Y	N	Y	Y	N	14
P27	Pre	17	7578370	C>T	7578370_C>T	11998	TP53	NM_000546/c.559+1G>A/-	872	3	0.00342857	N	Y	N	N	N	Y	N (removed by WBC)	N not PASS, in normal
P27	Pre	17	7578203	C>T	7578203_C>T	11998	TP53	NM_000546/c.646G>A/p.Val216Met	906	6	0.00657895	Y	Y	N	N	N	Y	N (removed by WBC)	N not PASS, in normal
P27	Pre	17	7577121	G>A	7577121_G>A	11998	TP53	NM_000546/c.817C>T/p.Arg273Cys	690	4	0.00576369	Y	Y	Y	Y	Y	Y	Y	Y	29
P28	Pre	12	25398281	C>T	25398281_C>T	6407	KRAS	NM_033360/c.38G>A/p.Gly13Asp	1406	4	0.00283688	Y	Y	Y	Y	Y	Y	Y	Y	27
P28	Pre	1	27106077	GC>G	27106077_GC>G	11110	ARID1A	NM_006015/c.5693del/p.Pro1898HisfsTer25	1862	7	0.00374532	N	Y	Y	Y	Y	Y	Y	Y	26
P28	Pre	17	7577120	C>T	7577120_C>T	11998	TP53	NM_000546/c.818G>A/p.Arg273His	2015	8	0.00395452	Y	Y	Y	Y	Y	Y	Y	Y	38
P30	Pre	17	37881577	C>T	37881577_C>T	3430 | 28230 | 41632	ERBB2 | MIEN1 | MIR4728	XM_005257140/c.2650-3C>T/- | NR_039881/-/-	7388	77	0.0103148	N	N	N	N	N	Y	Y (no WBC, not in post-surgical sample)	No analysis
P30	Pre	5	112179155	C>A	112179155_C>A	583	APC	XM_005271976/c.7864C>A/p.Pro2622Thr	1183	71	0.0566188	N	N	Y	Y	Y	Y	Y (no WBC, not in post-surgical sample)	No analysis	7
P30	Pre	17	7577120	C>T	7577120_C>T	11998	TP53	NM_000546/c.818G>A/p.Arg273His	1071	135	0.11194	Y	Y	Y	Y	Y	Y	Y (no WBC, not in post-surgical sample)	No analysis	12
P31	Pre	17	7578415	A>C	7578415_A>C	11998	TP53	NM_000546/c.515T>G/p.Val172Gly	1367	22	0.0158387	N	N	N	N	N	Y	Y	Y
P33	Pre	17	7577022	G>A	7577022_G>A	11998	TP53	NM_000546/c.916C>T/p.Arg306Ter	2112	48	0.0222222	Y	Y	N	N	N	Y	N (removed by WBC, no postop)	N not PASS, in normal
P33	Pre	17	29546035	C>T	29546035_C>T	7765	NF1	NM_001042492/c.1540C>T/p.Gln514Ter	2013	73	0.0349952	N	Y	N	N	N	Y	N (removed by WBC, no postop)	N not PASS, in normal
P38	Pre	17	7577539	G>A	7577539_G>A	11998	TP53	NM_000546/c.742C>T/p.Arg248Trp	1108	3	0.00270027	Y	Y	Y	Y	Y	Y	NA (no WBC, no post-surgical sample)	No analysis and no post-surgical sample	56
P38	Pre	17	29559090	G>A	29559090_G>A	7765	NF1	NM_001042492/c.3198-1G>A/-	640	9	0.0138675	N	N	N	N	N	Y	NA (no WBC, no post-surgical sample)	No analysis and no post-surgical sample
P39	Pre	17	73585403	A>C	73585403_A>C	14083	MYO15B	NR_003587/n.1265A>C/-	28	5	0.151515	N	N	N	N	N	Y	Y (no WBC, not in post-surgical sample)	No analysis
P41	Pre	17	29556941	C>G	29556941_C>G	7765	NF1	NM_001042492/c.2939C>G/p.Ser980Cys	2952	90	0.0295858	N	N	N	N	N	Y	Y	Y
P41	Pre	17	7577121	G>A	7577121_G>A	11998	TP53	NM_000546/c.817C>T/p.Arg273Cys	2861	593	0.171685	Y	Y	Y	Y	Y	Y	Y	Y	70
P43	Pre	12	25398284	C>T	25398284_C>T	6407	KRAS	NM_033360/c.35G>A/p.Gly12Asp	850	4	0.00468384	Y	Y	Y	Y	N	Y	Y	N	9
P43	Pre	17	56435160	AC>A	56435160_AC>A	18505 | 44148 | 11467	RNF43 | TSPOAP1-AS1 | SUPT4H1	NM_017763/c.1976del/p.Gly659ValfsTer41 | NR_038410/-/-	1962	12	0.00607903	Y	N	Y	Y	Y	Y	N (CHIP based on post-surgical sample)	N not PASS, in normal	12
P43	Pre	3	178936092	A>C	178936092_A>C	NM_006218.4	PIK3CA	NM_006218.4:c.1634A>C,p.Glu545Ala			NA	N?	N?	Y	N	Y	N	N (not in C)	N not PASS	6
P43	Pre	17	37881414	T>G	37881414_T>G		ERBB2;MIEN1;MIR4728	NM_004448.3:c.2606T>G,p.Leu869Arg			NA	N?	N?	Y	N	Y	N	N (not in C)	Y	7
P43	Pre	1	27023715	TG>T	27023715_TG>T	11110	ARID1A	NM_006015/c.827del/p.Gly276GlufsTer87	972	9	0.00917431	N	N	Y	Y	Y	Y	Y	N not pass, in normal but only 3 reads	8
P43	Pre	17	7578400	G>A	7578400_G>A	11998	TP53	NM_000546/c.530C>T/p.Pro177Leu	2063	41	0.0194867	N	Y	N	N	N	Y	N (CHIP based on post-surgical sample)	N not PASS, in normal
P44	Pre	17	7577120	C>T	7577120_C>T		TP53	NM_000546:c.818G>A,p.Arg273His			NA	N?	N?	Y	N	Y	N	N (no WBC, not in C)	No analysis	58
P44	Pre	17	29684389	T>A	29684389_T>A	7765	NF1	NM_001042492/c.7970+2T>A/-	1396	16	0.0113314	N	N	N	N	N	Y	N (no WBC, CHIP based on post-surgical sample)	No analysis
P46	Pre	17	29496985	G>T	29496985_G>T	7765	NF1	NM_001042492/c.556G>T/p.Asp186Tyr	1441	11	0.00757576	N	N	N	N	N	Y	Y (no WBC, not in post-surgical sample)	No analysis
P46	Pre	17	7579592	T>C	7579592_T>C	11998	TP53	NM_000546/c.97-2A>G/-	1983	4	0.00201309	N	Y	Y	Y	Y	Y	Y	N only 5 reads	6
P05	Post	16	68846057	T>C	68846057_T>C	1748	CDH1	NM_004360/c.1028T>C/p.Leu343Pro	1039	5	0.00478927	N	N	Y	Y	Y	Y	N (post-op ratio<4)	Y
P05	Post	1	27105922	C>T	27105922_C>T	11110	ARID1A	NM_006015/c.5533C>T/p.Arg1845Trp	833	4	0.00477897	N	N	Y	Y	Y	Y	N (post-op ratio<4)	Y
P05	Post	17	56435160	AC>A	56435160_AC>A	18505 | 44148 | 11467	RNF43 | TSPOAP1-AS1 | SUPT4H1	NM_017763/c.1976del/p.Gly659ValfsTer41 | NR_038410/-/-	899	8	0.00882029	Y	N	Y	Y	Y	Y	N (post-op ratio<4)	Y?
P05	Post	4	153244155	TC>T	153244155_TC>T	16712	FBXW7	NM_033632/c.2001del/p.Ser668ValfsTer39	1547	7	0.0045045	N	N	Y	Y	Y	Y	Y (post-op ratio>4)	Y
P06	Post	17	7578190	T>C	7578190_T>C	11998	TP53	NM_000546/c.659A>G/p.Tyr220Cys	1600	137	0.0788716	Y	Y	N (below threshold)	N (below threshold)	N (below threshold)	Y	Y (no WBC, no variants postop)	No analysis
P10	Post	17	7578406	C>T	7578406_C>T	11998	TP53	NM_000546/c.524G>A/p.Arg175His	2669	5	0.00186986	Y	Y	N	N	N	Y	Y (no WBC, no variants postop)	No analysis
P16	Post	12	133249796	G>A	133249796_G>A	9177	POLE	NM_006231/c.1427C>T/p.Pro476Leu	499	14	0.0272904	N	N	N	N	N	Y	N (no WBC, CHIP based on post-surgical sample)	No analysis
P17	Post	17	7578443	A>C	7578443_A>C	11998	TP53	NM_000546/c.487T>G/p.Tyr163Asp	2946	9	0.00304569	Y	Y	Y	Y	Y	Y	Y (post-op ratio>4)	Y
P17	Post	12	25398284	C>A	25398284_C>A	6407	KRAS	NM_033360/c.35G>T/p.Gly12Val	1322	3	0.00226415	Y	Y	Y	Y	Y	Y	Y (post-op ratio>4)	Y
P24	Post	17	7578406	C>T	7578406_C>T		TP53	NM_000546.5:c.524G>A,p.Arg175His			NA	N?	N?	Y	N	Y	N	N (no WBC, not in C)	No analysis
P26	Post	17	7578430	T>TGTC	7578430_T>TGTC	11998	TP53	NM_000546/c.499_500insGAC/p.Ser166_Gln167insArg	2273	24	0.0104484	N	N	Y	Y	N	N (not preop)	Y (but no WBC)	No analysis
P43	Post	17	7578400	G>A	7578400_G>A	11998	TP53	NM_000546/c.530C>T/p.Pro177Leu	753	15	0.0195312	N	Y	N	N	N	Y	N (CHIP based on post-surgical sample)	N
P43	Post	17	56435160	AC>A	56435160_AC>A	18505 | 44148 | 11467	RNF43 | TSPOAP1-AS1 | SUPT4H1	NM_017763/c.1976del/p.Gly659ValfsTer41 | NR_038410/-/-	703	4	0.00565771	Y	N	Y	Y	Y	Y	N (CHIP based on post-surgical sample)	Y?
P44	Post	17	29684389	T>A	29684389_T>A	7765	NF1	NM_001042492/c.7970+2T>A/-	574	3	0.00519931	N	N	N	N	N	Y	N (no WBC, CHIP based on post-surgical sample)	No analysis
